# Supplementary material for: Assembly of a Comprehensive Regulatory Network for the Mammalian Circadian Clock: A Bioinformatics Approach
Source: PLoS One. 2015 May 6;10(5):e0126283. doi: 10.1371/journal.pone.0126283 (PMC4422523; doi:10.1371/journal.pone.0126283)
Supplement: S2 Table — (XLSX) [file pone.0126283.s011.xlsx]

## Sheet: supplement3
Interactions for IFNA1(3439)
Sentences between IFNG and IFNA13
PMID.dPMID1705997.s10.p0	http://www.ncbi.nlm.nih.gov/pubmed/1705997	http://colonet.informatik.hu-berlin.de/geneview/view/abstract/1705997	In the IFN-alpha/beta-resistant FLC, IFN-gamma induces only the Fg complex and fails to induce F1.	IFN-gamma|3458@9606	IFN-alpha|3439@9606	153412
PMID.dPMID3121746.s11.p0	http://www.ncbi.nlm.nih.gov/pubmed/3121746	http://colonet.informatik.hu-berlin.de/geneview/view/abstract/3121746	The greatest similarities in polypeptide induction occur between IFN-alpha and IFN-gamma and between the IL-1s and TNF.	IFN-gamma|3458@9606	IFN-alpha|3439@9606	132517
PMID.dPMID1382910.s12.p0	http://www.ncbi.nlm.nih.gov/pubmed/1382910	http://colonet.informatik.hu-berlin.de/geneview/view/abstract/1382910	The data indicate that IFN-alpha and IFN-gamma can induce ANA associated with autoimmune disease in patients with myeloproliferative disorders.	IFN-gamma|3458@9606	IFN-alpha|3439@9606	127102
PMID.dPMID1693082.s21.p0	http://www.ncbi.nlm.nih.gov/pubmed/1693082	http://colonet.informatik.hu-berlin.de/geneview/view/abstract/1693082	IFN-alpha appears to resemble IFN-gamma in its ability to inhibit IgE and enhance IgG2a responses in GaM delta-injected mice, but it requires the presence of IFN-gamma to suppress IgG1 production in these mice.	IFN-gamma|15978@10090	IFN-alpha|3439@9606	116491
PMID.dPMID8807500.s10.p0	http://www.ncbi.nlm.nih.gov/pubmed/8807500	http://colonet.informatik.hu-berlin.de/geneview/view/abstract/8807500	The cooperation between IFN-gamma and IFN-alpha in macrophages may play a role in the antiviral defense of the body.	IFN-alpha|3439@9606	IFN-gamma|3458@9606	115798
PMID.dPMID15829421.s5.p0	http://www.ncbi.nlm.nih.gov/pubmed/15829421	http://colonet.informatik.hu-berlin.de/geneview/view/abstract/15829421	Results show that IFNgamma and IFNalpha influence NK cell function differently.	IFNalpha|3439@9606	IFNgamma|3458@9606	110019
PMID.dPMID2174056.s9.p2	http://www.ncbi.nlm.nih.gov/pubmed/2174056	http://colonet.informatik.hu-berlin.de/geneview/view/abstract/2174056	The results indicate that despite the presence of an ISRE, the control region of the IDO gene can distinguish between IFN-gamma and IFN-alpha.	IFN-alpha|3439@9606	IFN-gamma|3458@9606	106955
PMID.dPMID7705772.s15.p0	http://www.ncbi.nlm.nih.gov/pubmed/7705772	http://colonet.informatik.hu-berlin.de/geneview/view/abstract/7705772	We conclude that IFN-alpha and IFN-gamma inhibit proliferation as well as collagen synthesis in human MFBIC.	IFN-gamma|3458@9606	IFN-alpha|3439@9606	104489
PMID.dPMID1290032.s6.p0	http://www.ncbi.nlm.nih.gov/pubmed/1290032	http://colonet.informatik.hu-berlin.de/geneview/view/abstract/1290032	Statistically, there was no correlation between IFN-alpha and IFN-gamma values.	IFN-gamma|3458@9606	IFN-alpha|3439@9606	102242
PMID.dPMID22442968.s12.p0	http://www.ncbi.nlm.nih.gov/pubmed/22442968	http://colonet.informatik.hu-berlin.de/geneview/view/abstract/22442968	Correlation analysis showed that there is a strong negative association between IFNalpha, IFNgamma and seroconversion.	IFNgamma|3458@9606	IFNalpha|3439@9606	101987
Sentences between IFNB1 and IFNA13
PMID.dPMID10871875.s1.p0	http://www.ncbi.nlm.nih.gov/pubmed/10871875	http://colonet.informatik.hu-berlin.de/geneview/view/abstract/10871875	IFN-alpha and IFN-beta: a link between immune memory and chronic inflammation.	IFN-beta|3456@9606	IFN-alpha|3439@9606	116809
PMID.dPMID3014018.s4.p0	http://www.ncbi.nlm.nih.gov/pubmed/3014018	http://colonet.informatik.hu-berlin.de/geneview/view/abstract/3014018	IFN-beta ser was cleared from the nose like IFN-alpha.	IFN-alpha|3439@9606	IFN-beta|3456@9606	116518
PMID.dPMID15374728.s4.p0	http://www.ncbi.nlm.nih.gov/pubmed/15374728	http://colonet.informatik.hu-berlin.de/geneview/view/abstract/15374728	It was suggested that IFN-beta may be more suitable than IFN-alpha as an anti-endometriotic agent.	IFN-alpha|3439@9606	IFN-beta|3456@9606	103561
PMID.dPMID1506772.s12.p0	http://www.ncbi.nlm.nih.gov/pubmed/1506772	http://colonet.informatik.hu-berlin.de/geneview/view/abstract/1506772	Cytotoxin suppression by IFN-alpha and IFN-beta together appeared to be noninteractive.	IFN-beta|3456@9606	IFN-alpha|3439@9606	0.994454
PMID.dPMID11544103.s5.p0	http://www.ncbi.nlm.nih.gov/pubmed/11544103	http://colonet.informatik.hu-berlin.de/geneview/view/abstract/11544103	IFN-alpha and IFN-beta have a globular structure composed of five a-helices.	IFN-beta|3456@9606	IFN-alpha|3439@9606	0.93603
PMID.dPMID10871875.s5.p0	http://www.ncbi.nlm.nih.gov/pubmed/10871875	http://colonet.informatik.hu-berlin.de/geneview/view/abstract/10871875	Here, observations that IFN-alpha and IFN-beta inhibit activated T-cell apoptosis are described.	IFN-beta|3456@9606	IFN-alpha|3439@9606	0.915672
PMID.dPMID1740663.s11.p0	http://www.ncbi.nlm.nih.gov/pubmed/1740663	http://colonet.informatik.hu-berlin.de/geneview/view/abstract/1740663	Inducibility of endogenous IFN-beta and IFN-alpha RNA was also increased in PLB-IIIB cells.	IFN-alpha|3439@9606	IFN-beta|3456@9606	0.882161
PMC.dPMC1740663.s11.p0	http://www.ncbi.nlm.nih.gov/pubmed/1740663	http://colonet.informatik.hu-berlin.de/geneview/view/abstract/1740663	Inducibility of endogenous IFN-beta and IFN-alpha RNA was also increased in PLB-IIIB cells.	IFN-alpha|3439@9606	IFN-beta|3456@9606	0.882161
PMID.dPMID19651532.s6.p0	http://www.ncbi.nlm.nih.gov/pubmed/19651532	http://colonet.informatik.hu-berlin.de/geneview/view/abstract/19651532	This review also summarizes the structural differences between IFN-beta and different IFN-alpha subtypes, their interaction with their common receptor IFNAR, and their potency to elicit antiviral, antiproliferative and antitumoral responses.	IFN-alpha|3439@9606	IFN-beta|3456@9606	0.868404
PMID.dPMID1431305.s13.p2	http://www.ncbi.nlm.nih.gov/pubmed/1431305	http://colonet.informatik.hu-berlin.de/geneview/view/abstract/1431305	We propose that the 78-95 region influences species specificity among the murine and human IFN-alpha s and determines the differential specificity of action between human IFN-alpha and human IFN-beta.	IFN-beta|3456@9606	IFN-alpha|3439@9606	0.854595
Sentences between IL2 and IFNA13
PMID.dPMID11704790.s6.p0	http://www.ncbi.nlm.nih.gov/pubmed/11704790	http://colonet.informatik.hu-berlin.de/geneview/view/abstract/11704790	IL-2 and IFN-alpha enhance NK-cell activity.	IFN-alpha|3439@9606	IL-2|3558@9606	125277
PMID.dPMID3262520.s9.p0	http://www.ncbi.nlm.nih.gov/pubmed/3262520	http://colonet.informatik.hu-berlin.de/geneview/view/abstract/3262520	Sequential incubations showed that IFN-alpha acted earlier than IL2 on B cell response.	IL2|3558@9606	IFN-alpha|3439@9606	0.935742
PMID.dPMID3262520.s10.p0	http://www.ncbi.nlm.nih.gov/pubmed/3262520	http://colonet.informatik.hu-berlin.de/geneview/view/abstract/3262520	The effect of IFN-alpha was dependent on an efficient interaction between IL2 and its receptor which could be inhibited by a monoclonal antibody toward the CD25 antigen.	IL2|3558@9606	IFN-alpha|3439@9606	0.849354
PMID.dPMID12943498.s8.p0	http://www.ncbi.nlm.nih.gov/pubmed/12943498	http://colonet.informatik.hu-berlin.de/geneview/view/abstract/12943498	Biological therapies with IFN-alpha and IL-2 have demonstrated a real but minimal effect.	IL-2|3558@9606	IFN-alpha|3439@9606	0.823784
PMID.dPMID2818821.s1.p0	http://www.ncbi.nlm.nih.gov/pubmed/2818821	http://colonet.informatik.hu-berlin.de/geneview/view/abstract/2818821	Suppression of T-lymphocyte blastogenesis by ovine trophoblast protein-1 and human interferon-alpha may be independent of interleukin-2 production.	interleukin-2|3558@9606	interferon-alpha|3439@9606	0.783295
PMID.dPMID2783561.s11.p0	http://www.ncbi.nlm.nih.gov/pubmed/2783561	http://colonet.informatik.hu-berlin.de/geneview/view/abstract/2783561	The IL-2- and IFN-alpha-induced increase in lung water weight was also reduced significantly by the addition of IL-1 alpha.	IFN-alpha|3439@9606	IL-2|16183@10090	0.733492
PMID.dPMID11784295.s6.p0	http://www.ncbi.nlm.nih.gov/pubmed/11784295	http://colonet.informatik.hu-berlin.de/geneview/view/abstract/11784295	In the present study, the effects of IFN-alpha on IL-2 signal transduction was investigated.	IL-2|3558@9606	IFN-alpha|3439@9606	0.706951
PMID.dPMID12218122.s7.p0	http://www.ncbi.nlm.nih.gov/pubmed/12218122	http://colonet.informatik.hu-berlin.de/geneview/view/abstract/12218122	IFN-alpha is needed to maintain high level IL-2 production, which is confined to type 2 cytokine-producing cells and lost in the IFN-gamma(+) ones.	IL-2|3558@9606	IFN-alpha|3439@9606	0.697943
PMID.dPMID11593642.s10.p0	http://www.ncbi.nlm.nih.gov/pubmed/11593642	http://colonet.informatik.hu-berlin.de/geneview/view/abstract/11593642	IFN-alpha can augment the purging effect of IL-2 ABM and combination of the two cytokines can effectively maintain the cytotoxicity of ABM.	IL-2|3558@9606	IFN-alpha|3439@9606	0.67308
PMID.dPMID15625846.s9.p0	http://www.ncbi.nlm.nih.gov/pubmed/15625846	http://colonet.informatik.hu-berlin.de/geneview/view/abstract/15625846	IFN-alpha can augment the purging effect of IL-2 ABM and combination of the two cytokines can effectively maintain the cytotoxicity of ABM.	IL-2|3558@9606	IFN-alpha|3439@9606	0.67308
Sentences between TNF and IFNA13
PMID.dPMID16542137.s1.p0	http://www.ncbi.nlm.nih.gov/pubmed/16542137	http://colonet.informatik.hu-berlin.de/geneview/view/abstract/16542137	Ingested (oral) IFN-alpha represses TNF-alpha mRNA in relapsing-remitting multiple sclerosis.	TNF-alpha|7124@9606	IFN-alpha|3439@9606	11135
PMID.dPMID1906289.s9.p0	http://www.ncbi.nlm.nih.gov/pubmed/1906289	http://colonet.informatik.hu-berlin.de/geneview/view/abstract/1906289	These results suggest that IFN-alpha and TNF-alpha are induced by different agents during HIV-1 infection.	TNF-alpha|7124@9606	IFN-alpha|3439@9606	110195
PMID.dPMID1552742.s8.p0	http://www.ncbi.nlm.nih.gov/pubmed/1552742	http://colonet.informatik.hu-berlin.de/geneview/view/abstract/1552742	These results contradict the hypothesis that IFN alpha exerts its therapeutic action in HCL by inhibition of autocrine TNF alpha production.	TNF alpha|7124@9606	IFN alpha|3439@9606	105946
PMID.dPMID12445524.s5.p0	http://www.ncbi.nlm.nih.gov/pubmed/12445524	http://colonet.informatik.hu-berlin.de/geneview/view/abstract/12445524	In 1989 we proposed also treating AD including AIDS by removing TNF-alpha and IFN-alpha.	IFN-alpha|3439@9606	TNF-alpha|7124@9606	0.989494
PMID.dPMID16270532.s5.p0	http://www.ncbi.nlm.nih.gov/pubmed/16270532	http://colonet.informatik.hu-berlin.de/geneview/view/abstract/16270532	IFN-alpha enhanced TNF-alpha-induced apoptosis.	TNF-alpha|7124@9606	IFN-alpha|3439@9606	0.957092
PMID.dPMID12949243.s8.p0	http://www.ncbi.nlm.nih.gov/pubmed/12949243	http://colonet.informatik.hu-berlin.de/geneview/view/abstract/12949243	Synergy between IFN-alpha and TNF-alpha was also seen for CXCL9 and CXCL10 mRNA expression.	TNF-alpha|7124@9606	IFN-alpha|3439@9606	0.947191
PMID.dPMID18535206.s10.p2	http://www.ncbi.nlm.nih.gov/pubmed/18535206	http://colonet.informatik.hu-berlin.de/geneview/view/abstract/18535206	CD300a/c triggering by cross-linking antibody reduced TNF-alpha and increased IFN-alpha secretion by pDCs.	IFN-alpha|3439@9606	TNF-alpha|7124@9606	0.946369
PMID.dPMID11449369.s8.p0	http://www.ncbi.nlm.nih.gov/pubmed/11449369	http://colonet.informatik.hu-berlin.de/geneview/view/abstract/11449369	Unlike IFN-alpha, TNF-alpha is up-regulated in PDC by all CpG ODN tested.	TNF-alpha|7124@9606	IFN-alpha|3439@9606	0.890594
PMID.dPMID8572582.s8.p0	http://www.ncbi.nlm.nih.gov/pubmed/8572582	http://colonet.informatik.hu-berlin.de/geneview/view/abstract/8572582	These findings demonstrate that IFN-alpha, TNF-alpha and FUra have a distinct antitumor effect in combination.	TNF-alpha|7124@9606	IFN-alpha|3439@9606	0.880615
PMC.dPMC21603192.s110.p0	http://www.ncbi.nlm.nih.gov/pubmed/21603192	http://colonet.informatik.hu-berlin.de/geneview/view/abstract/21603192	In particular, a cross-regulation between IFN-alpha and TNF-alpha has been recently proposed, where both cytokines may interact each other to affect the inflammatory responses [].	TNF-alpha|7124@9606	IFN-alpha|3439@9606	0.843425
Sentences between STAT1 and IFNA13
PMID.dPMID11350940.s5.p0	http://www.ncbi.nlm.nih.gov/pubmed/11350940	http://colonet.informatik.hu-berlin.de/geneview/view/abstract/11350940	Here it is shown that IFN-alpha and -gamma signalling and STAT1 translocation are independent of the actin cytoskeleton or microtubules.	STAT1|6772@9606	IFN-alpha|3439@9606	0.862077
PMID.dPMID12429724.s1.p0	http://www.ncbi.nlm.nih.gov/pubmed/12429724	http://colonet.informatik.hu-berlin.de/geneview/view/abstract/12429724	CpG-DNA-induced IFN-alpha production involves p38 MAPK-dependent STAT1 phosphorylation in human plasmacytoid dendritic cell precursors.	STAT1|6772@9606	IFN-alpha|3439@9606	0.845267
PMID.dPMID18218993.s1.p0	http://www.ncbi.nlm.nih.gov/pubmed/18218993	http://colonet.informatik.hu-berlin.de/geneview/view/abstract/18218993	Human metapneumovirus inhibits IFN-alpha signaling through inhibition of STAT1 phosphorylation.	STAT1|6772@9606	IFN-alpha|3439@9606	0.821985
PMC.dPMC21603192.s102.p0	http://www.ncbi.nlm.nih.gov/pubmed/21603192	http://colonet.informatik.hu-berlin.de/geneview/view/abstract/21603192	In particular, IFN-alpha induces STAT1 expression, a Th1 transcription factor that regulates several genes involved in the inflammatory response [].	STAT1|6772@9606	IFN-alpha|3439@9606	0.78455
PMID.dPMID12967644.s7.p0	http://www.ncbi.nlm.nih.gov/pubmed/12967644	http://colonet.informatik.hu-berlin.de/geneview/view/abstract/12967644	The results indicate that STAT1 activation play a crucial role in IFNalpha signaling for cytolysis function of NK cells.	IFNalpha|3439@9606	STAT1|6772@9606	0.776832
PMID.dPMID1496402.s5.p0	http://www.ncbi.nlm.nih.gov/pubmed/1496402	http://colonet.informatik.hu-berlin.de/geneview/view/abstract/1496402	A system was developed in which IFN-alpha activated ISGF3 in homogenates of HeLa cells.	ISGF3|6772@9606	IFN-alpha|3439@9606	0.751063
PMID.dPMID14512876.s9.p1	http://www.ncbi.nlm.nih.gov/pubmed/14512876	http://colonet.informatik.hu-berlin.de/geneview/view/abstract/14512876	These inhibitory effects of IFN-alpha on COL1A2 transcription were exerted through the interaction between phosphorylated Stat1 and p300.	Stat1|20846@10090	IFN-alpha|3439@9606	0.731633
PMID.dPMID11034314.s1.p0	http://www.ncbi.nlm.nih.gov/pubmed/11034314	http://colonet.informatik.hu-berlin.de/geneview/view/abstract/11034314	IL-10 attenuates IFN-alpha-activated STAT1 in the liver: involvement of SOCS2 and SOCS3.	STAT1|6772@9606	IFN-alpha|3439@9606	0.715409
PMID.dPMID9804758.s11.p0	http://www.ncbi.nlm.nih.gov/pubmed/9804758	http://colonet.informatik.hu-berlin.de/geneview/view/abstract/9804758	In summary, our results indicate that the SH2 domain of STAT1 is not required for its ligand-dependent activation by IFNalpha/beta.	IFNalpha|3439@9606	STAT1|6772@9606	0.713634
PMID.dPMID19396596.s1.p0	http://www.ncbi.nlm.nih.gov/pubmed/19396596	http://colonet.informatik.hu-berlin.de/geneview/view/abstract/19396596	Bortezomib pre-treatment prolongs interferon-alpha-induced STAT1 phosphorylation in melanoma cells.	STAT1|6772@9606	interferon-alpha|3439@9606	0.697812
Sentences between IL6 and IFNA13
PMID.dPMID7619053.s5.p0	http://www.ncbi.nlm.nih.gov/pubmed/7619053	http://colonet.informatik.hu-berlin.de/geneview/view/abstract/7619053	Furthermore, IFN-alpha inhibits the ability of IL-6 to induce increases in [3H]thymidine incorporation.	IL-6|3569@9606	IFN-alpha|3439@9606	11415
PMID.dPMID11167829.s9.p0	http://www.ncbi.nlm.nih.gov/pubmed/11167829	http://colonet.informatik.hu-berlin.de/geneview/view/abstract/11167829	Altogether, our data show that IFN-alpha has an IL-6-like effect on human myeloma cells and suggest that it could be deleterious in some patients.	IL-6|3569@9606	IFN-alpha|3439@9606	0.983109
PMID.dPMID1753108.s1.p0	http://www.ncbi.nlm.nih.gov/pubmed/1753108	http://colonet.informatik.hu-berlin.de/geneview/view/abstract/1753108	IFN-alpha induces autocrine production of IL-6 in myeloma cell lines.	IL-6|3569@9606	IFN-alpha|3439@9606	0.901212
PMID.dPMID9743325.s9.p0	http://www.ncbi.nlm.nih.gov/pubmed/9743325	http://colonet.informatik.hu-berlin.de/geneview/view/abstract/9743325	However, unlike IL-6, IFN-alpha-treated cells remained mainly blocked in the G1 phase of the cycle.	IFN-alpha|3439@9606	IL-6|3569@9606	0.892725
PMID.dPMID7619053.s10.p0	http://www.ncbi.nlm.nih.gov/pubmed/7619053	http://colonet.informatik.hu-berlin.de/geneview/view/abstract/7619053	IFN-alpha reduces 125I-IL-6 binding without affecting its affinity, suggesting that IFN-alpha inhibits IL-6 receptor expression.	IL-6|3569@9606	IFN-alpha|3439@9606	0.823541
PMID.dPMID9449698.s10.p0	http://www.ncbi.nlm.nih.gov/pubmed/9449698	http://colonet.informatik.hu-berlin.de/geneview/view/abstract/9449698	These data implicate IL-6 and IFN-alpha as key factors both in symptom formation and host defense in influenza.	IFN-alpha|3439@9606	IL-6|3569@9606	0.779305
PMID.dPMID8627079.s8.p0	http://www.ncbi.nlm.nih.gov/pubmed/8627079	http://colonet.informatik.hu-berlin.de/geneview/view/abstract/8627079	Significantly more IFN-alpha and IL-6 were detected in culture supernatants of EBV-seronegative persons after stimulation with Newcastle disease virus.	IL-6|3569@9606	IFN-alpha|3439@9606	0.767193
PMID.dPMID8666316.s10.p0	http://www.ncbi.nlm.nih.gov/pubmed/8666316	http://colonet.informatik.hu-berlin.de/geneview/view/abstract/8666316	In conclusion, we found that IL-6 was induced by IFN-alpha in vivo, and that this induction was completely abrogated by the administration of GM.	IFN-alpha|3439@9606	IL-6|3569@9606	0.752636
PMID.dPMID9030876.s9.p0	http://www.ncbi.nlm.nih.gov/pubmed/9030876	http://colonet.informatik.hu-berlin.de/geneview/view/abstract/9030876	IFN-alpha significantly increased plasma concentrations of IL-6, IL-8 and IL-10.	IL-6|3569@9606	IFN-alpha|3439@9606	0.750762
PMID.dPMID11096458.s8.p0	http://www.ncbi.nlm.nih.gov/pubmed/11096458	http://colonet.informatik.hu-berlin.de/geneview/view/abstract/11096458	Despite this decrease, IFN-alpha priming causes very high levels of IL-6 protein expression in response to dsRNA but not in response to IL-1beta or TNF-alpha.	IL-6|3569@9606	IFN-alpha|3439@9606	0.71511
Sentences between IL10 and IFNA13
PMID.dPMID12817009.s9.p0	http://www.ncbi.nlm.nih.gov/pubmed/12817009	http://colonet.informatik.hu-berlin.de/geneview/view/abstract/12817009	The data show that IFN-alpha induces the IL-10 gene via a module consisting of interdependent IRF-1 and Stat3 motifs.	IL-10|3586@9606	IFN-alpha|3439@9606	118472
PMC.dPMC16800882.s108.p0	http://www.ncbi.nlm.nih.gov/pubmed/16800882	http://colonet.informatik.hu-berlin.de/geneview/view/abstract/16800882	A. Tnf-╬▒, ifn-╬│ and il-10 expressions.	il-10|3586@9606	ifn|3439@9606	0.967289
PMID.dPMID9637497.s1.p0	http://www.ncbi.nlm.nih.gov/pubmed/9637497	http://colonet.informatik.hu-berlin.de/geneview/view/abstract/9637497	Exogenous and endogenous IL-10 regulate IFN-alpha production by peripheral blood mononuclear cells in response to viral stimulation.	IFN-alpha|3439@9606	IL-10|3586@9606	0.9513
PMID.dPMID16936109.s11.p0	http://www.ncbi.nlm.nih.gov/pubmed/16936109	http://colonet.informatik.hu-berlin.de/geneview/view/abstract/16936109	The data suggest that IFN-alpha may control uveitis by promoting induction of IL-10-producing T-cells, possibly T-regulatory cells.	IL-10|3586@9606	IFN-alpha|3439@9606	0.870507
PMID.dPMID18221304.s9.p0	http://www.ncbi.nlm.nih.gov/pubmed/18221304	http://colonet.informatik.hu-berlin.de/geneview/view/abstract/18221304	In these latter, IFNalpha increased the synthesis of IL-10 compared with baseline.	IL-10|3586@9606	IFNalpha|3439@9606	0.870275
PMID.dPMID9557212.s1.p0	http://www.ncbi.nlm.nih.gov/pubmed/9557212	http://colonet.informatik.hu-berlin.de/geneview/view/abstract/9557212	Inhibitory effect of interleukin-10 on human leukocyte interferon-alpha production by Sendai virus.	interferon-alpha|3439@9606	interleukin-10|3586@9606	0.846246
PMID.dPMID18771341.s10.p3	http://www.ncbi.nlm.nih.gov/pubmed/18771341	http://colonet.informatik.hu-berlin.de/geneview/view/abstract/18771341	The results obtained indicate that baicalein- and wogonin-containing extracts modulate cytokine production, that is inhibit IFN-alpha and IFN-gamma and stimulate TNF-alpha and IL (IL-12, IL-10) production.	IL-10|3586@9606	IFN-alpha|3439@9606	0.821736
PMID.dPMID10648463.s9.p0	http://www.ncbi.nlm.nih.gov/pubmed/10648463	http://colonet.informatik.hu-berlin.de/geneview/view/abstract/10648463	The greater efficacy of combination therapy with IFN-alpha plus ribavirin may be related to its ability to suppress HCV-specific IL-10 production.	IL-10|3586@9606	IFN-alpha|3439@9606	0.81864
PMID.dPMID11730841.s9.p0	http://www.ncbi.nlm.nih.gov/pubmed/11730841	http://colonet.informatik.hu-berlin.de/geneview/view/abstract/11730841	Finally, the method was also used successfully to demonstrate that IFN-alpha induces IL-10 mRNA accumulation in human monocytes.	IL-10|3586@9606	IFN-alpha|3439@9606	0.742105
PMID.dPMID9637497.s14.p0	http://www.ncbi.nlm.nih.gov/pubmed/9637497	http://colonet.informatik.hu-berlin.de/geneview/view/abstract/9637497	We conclude that human IL-10 can serve as both an endogenous and exogenous regulator of IFN-alpha production.	IFN-alpha|3439@9606	IL-10|3586@9606	0.741848
Sentences between IL4 and IFNA13
PMID.dPMID14559900.s5.p0	http://www.ncbi.nlm.nih.gov/pubmed/14559900	http://colonet.informatik.hu-berlin.de/geneview/view/abstract/14559900	Here, we study cross-talk between IFN-alpha and IL-4 in human T cells.	IL-4|3565@9606	IFN-alpha|3439@9606	134444
PMID.dPMID9020930.s10.p0	http://www.ncbi.nlm.nih.gov/pubmed/9020930	http://colonet.informatik.hu-berlin.de/geneview/view/abstract/9020930	Our results indicate that IFN-alpha potently suppresses the abnormal IL-4 and IL-5 production, that IL-12 can correct the deficient IFN-gamma production and cell-mediated cytotoxicity, and that retinoids can enhance IFN-gamma and IL-12 production.	IL-4|3565@9606	IFN-alpha|3439@9606	0.897398
PMID.dPMID11167991.s5.p0	http://www.ncbi.nlm.nih.gov/pubmed/11167991	http://colonet.informatik.hu-berlin.de/geneview/view/abstract/11167991	We found that only IFN-alpha increased significantly whereas IL-4 decreased both EpCAM and LewisY expression.	IL-4|3565@9606	IFN-alpha|3439@9606	0.87314
PMID.dPMID2521231.s10.p3	http://www.ncbi.nlm.nih.gov/pubmed/2521231	http://colonet.informatik.hu-berlin.de/geneview/view/abstract/2521231	IFN-alpha inhibits IgE-BF production by IFN-gamma-stimulated PBMC and by IL-4-stimulated cells suggesting that it exerts its effect on B cells and on monocytes.	IL-4|3565@9606	IFN-alpha|3439@9606	0.842395
PMID.dPMID2521231.s11.p0	http://www.ncbi.nlm.nih.gov/pubmed/2521231	http://colonet.informatik.hu-berlin.de/geneview/view/abstract/2521231	Moreover IFN-alpha suppresses the IL-4-induced expression of Fc epsilon R II on B cells.	IL-4|3565@9606	IFN-alpha|3439@9606	0.828611
PMID.dPMID8856069.s1.p0	http://www.ncbi.nlm.nih.gov/pubmed/8856069	http://colonet.informatik.hu-berlin.de/geneview/view/abstract/8856069	The human IgE germline promoter is regulated by interleukin-4, interleukin-13, interferon-alpha and interferon-gamma via an interferon-gamma-activated site and its flanking regions.	interferon-alpha|3439@9606	interleukin-4|3565@9606	0.640009
PMID.dPMID15990796.s12.p3	http://www.ncbi.nlm.nih.gov/pubmed/15990796	http://colonet.informatik.hu-berlin.de/geneview/view/abstract/15990796	These results indicate that IFN-alpha enhances the induction of TH1 responses through upregulation of T-bet mRNA expression, as well as the induction of TH2 responses through upregulation of c-Maf mRNA expression, followed by IL-4 expression.	IL-4|3565@9606	IFN-alpha|3439@9606	0.63609
PMID.dPMID2521231.s13.p33	http://www.ncbi.nlm.nih.gov/pubmed/2521231	http://colonet.informatik.hu-berlin.de/geneview/view/abstract/2521231	Taken collectively the results indicate that: 1) IL-4 induces IgE-BF production by both B cells and monocytes, 2) IFN-gamma stimulates IgE-BF synthesis by monocytes but suppresses its production by IL-4-stimulated B cells, and finally 3) IFN-alpha inhibits IgE-BF synthesis in response to either IFN-gamma or IL-4.	IL-4|3565@9606	IFN-alpha|3439@9606	0.617739
PMID.dPMID2521231.s13.p10	http://www.ncbi.nlm.nih.gov/pubmed/2521231	http://colonet.informatik.hu-berlin.de/geneview/view/abstract/2521231	Taken collectively the results indicate that: 1) IL-4 induces IgE-BF production by both B cells and monocytes, 2) IFN-gamma stimulates IgE-BF synthesis by monocytes but suppresses its production by IL-4-stimulated B cells, and finally 3) IFN-alpha inhibits IgE-BF synthesis in response to either IFN-gamma or IL-4.	IFN-alpha|3439@9606	IL-4|3565@9606	0.610508
PMID.dPMID8156004.s1.p0	http://www.ncbi.nlm.nih.gov/pubmed/8156004	http://colonet.informatik.hu-berlin.de/geneview/view/abstract/8156004	Regulation of interleukin-5 production by interleukin-4, interferon-alpha, transforming growth factor-beta and interleukin-6.	interferon-alpha|3439@9606	interleukin-4|3565@9606	0.604464
Sentences between BCR and IFNA13
PMID.dPMID9657736.s1.p0	http://www.ncbi.nlm.nih.gov/pubmed/9657736	http://colonet.informatik.hu-berlin.de/geneview/view/abstract/9657736	Association between pretransplant interferon-alpha and outcome after unrelated donor marrow transplantation for chronic myelogenous leukemia in chronic phase.	chronic myelogenous leukemia|613@9606	interferon-alpha|3439@9606	107564
PMID.dPMID7596188.s8.p0	http://www.ncbi.nlm.nih.gov/pubmed/7596188	http://colonet.informatik.hu-berlin.de/geneview/view/abstract/7596188	However, if the 'faulty adhesion' hypothesis, and its correction by IFN-alpha, is to be considered correct, this case proves that it must include also Ph-negative, not BCR-ABL rearranged clonal myeloid proliferations.	BCR|613@9606	IFN-alpha|3439@9606	0.987293
PMID.dPMID14959848.s10.p0	http://www.ncbi.nlm.nih.gov/pubmed/14959848	http://colonet.informatik.hu-berlin.de/geneview/view/abstract/14959848	Our results indicate that IFN-alpha use in CML-CP reduces the number of CD34+ cells, activates T cells, enhances stem cell apoptotic markers and increases the production of intracellular IFN-gamma and IL-2 by lymphocytes.	CML|613@9606	IFN-alpha|3439@9606	0.951549
PMID.dPMID10484986.s11.p0	http://www.ncbi.nlm.nih.gov/pubmed/10484986	http://colonet.informatik.hu-berlin.de/geneview/view/abstract/10484986	However, our data suggest that IFN-alpha induces additional cytogenetic abnormalities even in the chronic phase through its immune-modulating effects and that these unusual cytogenetic abnormalities do not alter the history of CML.	CML|613@9606	IFN-alpha|3439@9606	0.883493
PMID.dPMID14999937.s14.p0	http://www.ncbi.nlm.nih.gov/pubmed/14999937	http://colonet.informatik.hu-berlin.de/geneview/view/abstract/14999937	The IFN-alpha was restarted to control the CML and hepatitis.	CML|613@9606	IFN-alpha|3439@9606	0.766684
PMID.dPMID15972148.s1.p0	http://www.ncbi.nlm.nih.gov/pubmed/15972148	http://colonet.informatik.hu-berlin.de/geneview/view/abstract/15972148	[Influence of IFN-alpha on function of CML-DC in vitro and expression of chemokine with its receptor].	CML|613@9606	IFN-alpha|3439@9606	0.763437
PMID.dPMID14959848.s11.p0	http://www.ncbi.nlm.nih.gov/pubmed/14959848	http://colonet.informatik.hu-berlin.de/geneview/view/abstract/14959848	Taken together, these results indicate that the therapeutic effect of IFN-alpha in CML-CP is mediated at least in part by immunological mechanisms.	CML|613@9606	IFN-alpha|3439@9606	0.758433
PMID.dPMID7543495.s5.p0	http://www.ncbi.nlm.nih.gov/pubmed/7543495	http://colonet.informatik.hu-berlin.de/geneview/view/abstract/7543495	We have recently demonstrated that IFN-alpha acts directly on CML hematopoietic progenitors to restore their adhesion to marrow stroma by modulating beta 1 integrin receptor function.	CML|613@9606	IFN-alpha|3439@9606	0.740622
PMID.dPMID12145689.s12.p0	http://www.ncbi.nlm.nih.gov/pubmed/12145689	http://colonet.informatik.hu-berlin.de/geneview/view/abstract/12145689	Therefore, IFN-alpha can induce DC differentiation from CML progenitor cells both in vitro and in vivo.	CML|613@9606	IFN-alpha|3439@9606	0.739717
PMID.dPMID7504544.s1.p0	http://www.ncbi.nlm.nih.gov/pubmed/7504544	http://colonet.informatik.hu-berlin.de/geneview/view/abstract/7504544	Potential mechanisms of action of interferon-alpha in CML.	CML|613@9606	interferon-alpha|3439@9606	0.738495
Sentences between MX1 and IFNA13
PMID.dPMID11257176.s12.p0	http://www.ncbi.nlm.nih.gov/pubmed/11257176	http://colonet.informatik.hu-berlin.de/geneview/view/abstract/11257176	Taken together, these results demonstrate that IFN-alpha inhibits HCV replicons via an MxA-independent pathway.	MxA|4599@9606	IFN-alpha|3439@9606	106872
PMC.dPMC21689416.s173.p0	http://www.ncbi.nlm.nih.gov/pubmed/21689416	http://colonet.informatik.hu-berlin.de/geneview/view/abstract/21689416	HDV proteins inhibit HBV replication by trans-repressing its enhancers and by trans-activating the IFN-alpha-inducible MxA gene [].	MxA|4599@9606	IFN-alpha|3439@9606	0.994241
PMID.dPMID16428869.s1.p2	http://www.ncbi.nlm.nih.gov/pubmed/16428869	http://colonet.informatik.hu-berlin.de/geneview/view/abstract/16428869	Correlation between the anti-virus-induced cytopathic effect activity of interferon-alpha subtypes and induction of MxA protein in vitro.	MxA|4599@9606	interferon-alpha|3439@9606	0.902338
PMID.dPMID19625466.s15.p0	http://www.ncbi.nlm.nih.gov/pubmed/19625466	http://colonet.informatik.hu-berlin.de/geneview/view/abstract/19625466	In conclusion, this study shows that HDV proteins inhibit HBV replication by trans-repressing its enhancers and by trans-activating the IFN-alpha-inducible MxA gene.	MxA|4599@9606	IFN-alpha|3439@9606	0.828521
PMID.dPMID11523057.s1.p0	http://www.ncbi.nlm.nih.gov/pubmed/11523057	http://colonet.informatik.hu-berlin.de/geneview/view/abstract/11523057	Intrahepatic MxA expression is correlated with interferon-alpha expression in chronic and fulminant hepatitis.	interferon-alpha|3439@9606	MxA|4599@9606	0.812314
PMID.dPMID18645522.s11.p0	http://www.ncbi.nlm.nih.gov/pubmed/18645522	http://colonet.informatik.hu-berlin.de/geneview/view/abstract/18645522	However, we found no correlation between IFN alpha and MxA expression levels, CD4 counts, and viral load.	MxA|4599@9606	IFN alpha|3439@9606	0.786775
PMID.dPMID17065141.s3.p0	http://www.ncbi.nlm.nih.gov/pubmed/17065141	http://colonet.informatik.hu-berlin.de/geneview/view/abstract/17065141	The aim of the study was to evaluate whether IFN-alpha/beta-inducible MxA protein expression in children receiving anticancer treatment can be used as an indicator for virus infections during the febrile episodes.	MxA|4599@9606	IFN-alpha|3439@9606	0.779907
PMID.dPMID7831843.s7.p0	http://www.ncbi.nlm.nih.gov/pubmed/7831843	http://colonet.informatik.hu-berlin.de/geneview/view/abstract/7831843	IFN-induced antiviral MxA protein was detected 3 days postinfection, suggesting IFN-alpha production in culture.	IFN-alpha|3439@9606	MxA|4599@9606	0.716256
PMID.dPMID8572623.s10.p0	http://www.ncbi.nlm.nih.gov/pubmed/8572623	http://colonet.informatik.hu-berlin.de/geneview/view/abstract/8572623	Moreover, there was no difference between recombinant or natural leukocyte IFN-alpha in the ability to induce MxA mRNA.	MxA|4599@9606	IFN-alpha|3439@9606	0.707092
PMID.dPMID11312354.s4.p0	http://www.ncbi.nlm.nih.gov/pubmed/11312354	http://colonet.informatik.hu-berlin.de/geneview/view/abstract/11312354	It was previously reported that human parainfluenza virus type 3 (HPIV3) multiplication was inhibited by IFN-alpha in human lung epithelial cells A549 and that MxA was found to contribute to the inhibition process (Zhao et al., Virology 220:330-338, 1996).	MxA|4599@9606	IFN-alpha|3439@9606	0.671678
Sentences between IFNA13 and PAEP
PMID.dPMID17030011.s6.p2	http://www.ncbi.nlm.nih.gov/pubmed/17030011	http://colonet.informatik.hu-berlin.de/geneview/view/abstract/17030011	Gene expression profiles were comparable between the PEG-IFN-alpha-2a and PEG-IFN-alpha-2b therapy.	PEG|5047@9606	IFN-alpha|3439@9606	0.893305
PMID.dPMID17030011.s6.p3	http://www.ncbi.nlm.nih.gov/pubmed/17030011	http://colonet.informatik.hu-berlin.de/geneview/view/abstract/17030011	Gene expression profiles were comparable between the PEG-IFN-alpha-2a and PEG-IFN-alpha-2b therapy.	IFN-alpha|3439@9606	PEG|5047@9606	0.893305
PMID.dPMID19258719.s11.p2	http://www.ncbi.nlm.nih.gov/pubmed/19258719	http://colonet.informatik.hu-berlin.de/geneview/view/abstract/19258719	We postulate PEG-IFN-alpha-2a treatment because both the molecular weight and the distribution volume of the PEG-IFN may accumulate in the liver resulting in an increase of plasma transaminase levels.	PEG|5047@9606	IFN-alpha|3439@9606	0.774206
PMID.dPMID19258719.s10.p1	http://www.ncbi.nlm.nih.gov/pubmed/19258719	http://colonet.informatik.hu-berlin.de/geneview/view/abstract/19258719	PEG-IFN-alpha-2a elimination and the addition of recombinant IFN-alpha-2a induced normalization of the plasma transaminase levels in about 2 months.	IFN-alpha|3439@9606	PEG|5047@9606	0.771222
PMID.dPMID12114447.s5.p0	http://www.ncbi.nlm.nih.gov/pubmed/12114447	http://colonet.informatik.hu-berlin.de/geneview/view/abstract/12114447	PEG-IFN-alpha at 7,000 units significantly decreased tumor incidence and volume.	IFN-alpha|3439@9606	PEG|5047@9606	0.670532
PMID.dPMID19100228.s6.p0	http://www.ncbi.nlm.nih.gov/pubmed/19100228	http://colonet.informatik.hu-berlin.de/geneview/view/abstract/19100228	For the last 25 years, conventional IFNalpha has been used as the treatment of chronic hepatitis B (CHB) and currently PEG-IFNalpha is indicated due to its greater effectiveness.	PEG|5047@9606	IFNalpha|3439@9606	0.668606
PMID.dPMID18081356.s24.p0	http://www.ncbi.nlm.nih.gov/pubmed/18081356	http://colonet.informatik.hu-berlin.de/geneview/view/abstract/18081356	Therefore, it is important to minimize PEG IFN-alpha-2a and ribavirin dose reductions by effectively managing treatment-related adverse events in elderly patients.	IFN-alpha|3439@9606	PEG|5047@9606	0.641794
PMID.dPMID18442866.s9.p0	http://www.ncbi.nlm.nih.gov/pubmed/18442866	http://colonet.informatik.hu-berlin.de/geneview/view/abstract/18442866	In this particular case it could be shown that the precipitation effect of PEG on IFN-alpha in water-filled pores plays a crucial role for the overall control of protein release.	IFN-alpha|3439@9606	PEG|5047@9606	0.598479
PMC.dPMC21994705.s69.p0	http://www.ncbi.nlm.nih.gov/pubmed/21994705	http://colonet.informatik.hu-berlin.de/geneview/view/abstract/21994705	Co-treatment with Peg-IFN increased this antiviral effect to 2.9 log10 IU/mL.	IFN|3439@9606	Peg|5047@9606	0.571234
PMID.dPMID19100228.s8.p0	http://www.ncbi.nlm.nih.gov/pubmed/19100228	http://colonet.informatik.hu-berlin.de/geneview/view/abstract/19100228	The advantages of IFNalpha and PEG-IFNalpha are that these drugs are administered for a limited time period, they achieve a higher sustained response rate and do not induce HBV mutants with antiviral resistance.	PEG|5047@9606	IFNalpha|3439@9606	0.550233
Sentences between CXCL10 and IFNA13
PMID.dPMID19759147.s9.p1	http://www.ncbi.nlm.nih.gov/pubmed/19759147	http://colonet.informatik.hu-berlin.de/geneview/view/abstract/19759147	Our results indicate that higher IFN-alpha, OAS, CXCL9, and CXCL10 mRNA expression in LN was associated with rapid disease progression and a LN environment that may favor SIV replication.	CXCL10|3627@9606	IFN-alpha|3439@9606	0.792476
PMID.dPMID18240301.s9.p0	http://www.ncbi.nlm.nih.gov/pubmed/18240301	http://colonet.informatik.hu-berlin.de/geneview/view/abstract/18240301	In summary, our data indicate that astrocytes are the predominant cell type responsible for the production of IFNalpha and CXCL10 in AGS.	CXCL10|3627@9606	IFNalpha|3439@9606	0.765693
PMC.dPMC22396727.s83.p0	http://www.ncbi.nlm.nih.gov/pubmed/22396727	http://colonet.informatik.hu-berlin.de/geneview/view/abstract/22396727	Inoculation with the same amount of UV-inactivated NY/238 virus was able to stimulate an IFNA1 and CXCL10 response.	CXCL10|3627@9606	IFNA1|3439@9606	0.710239
PMID.dPMID16499575.s8.p0	http://www.ncbi.nlm.nih.gov/pubmed/16499575	http://colonet.informatik.hu-berlin.de/geneview/view/abstract/16499575	Also, IFN-alpha maturation leads to an increase in IP-10 and MCP-1 chemokine secretion, but only a minor increase in IL-12p40 secretion.	IP-10|3627@9606	IFN-alpha|3439@9606	0.663968
PMC.dPMC21371334.s97.p0	http://www.ncbi.nlm.nih.gov/pubmed/21371334	http://colonet.informatik.hu-berlin.de/geneview/view/abstract/21371334	These results suggest that some pathways are commonly activated during neurotropic viral infection of the CNS, and the gene products like Ifn-╬│, Cxcl10/IP-10 etc.	Cxcl10|15945@10090	Ifn|3439@9606	0.622556
PMC.dPMC21371334.s97.p1	http://www.ncbi.nlm.nih.gov/pubmed/21371334	http://colonet.informatik.hu-berlin.de/geneview/view/abstract/21371334	These results suggest that some pathways are commonly activated during neurotropic viral infection of the CNS, and the gene products like Ifn-╬│, Cxcl10/IP-10 etc.	IP-10|15945@10090	Ifn|3439@9606	0.622556
PMID.dPMID18240301.s1.p0	http://www.ncbi.nlm.nih.gov/pubmed/18240301	http://colonet.informatik.hu-berlin.de/geneview/view/abstract/18240301	Astrocytes produce interferon-alpha and CXCL10, but not IL-6 or CXCL8, in Aicardi-Gouti├¿res syndrome.	CXCL10|3627@9606	interferon-alpha|3439@9606	0.598117
PMID.dPMID12949243.s8.p3	http://www.ncbi.nlm.nih.gov/pubmed/12949243	http://colonet.informatik.hu-berlin.de/geneview/view/abstract/12949243	Synergy between IFN-alpha and TNF-alpha was also seen for CXCL9 and CXCL10 mRNA expression.	CXCL10|3627@9606	IFN-alpha|3439@9606	0.569857
PMID.dPMID19450896.s1.p1	http://www.ncbi.nlm.nih.gov/pubmed/19450896	http://colonet.informatik.hu-berlin.de/geneview/view/abstract/19450896	Induction of IP-10/CXCL10 secretion as an immunomodulatory effect of low-dose adjuvant interferon-alpha during treatment of melanoma.	interferon-alpha|3439@9606	IP-10|3627@9606	0.561562
PMID.dPMID19450896.s1.p2	http://www.ncbi.nlm.nih.gov/pubmed/19450896	http://colonet.informatik.hu-berlin.de/geneview/view/abstract/19450896	Induction of IP-10/CXCL10 secretion as an immunomodulatory effect of low-dose adjuvant interferon-alpha during treatment of melanoma.	interferon-alpha|3439@9606	CXCL10|3627@9606	0.561562
Sentences between STAT3 and IFNA13
PMID.dPMID12817009.s9.p3	http://www.ncbi.nlm.nih.gov/pubmed/12817009	http://colonet.informatik.hu-berlin.de/geneview/view/abstract/12817009	The data show that IFN-alpha induces the IL-10 gene via a module consisting of interdependent IRF-1 and Stat3 motifs.	Stat3|6774@9606	IFN-alpha|3439@9606	0.807618
PMID.dPMID8626489.s4.p0	http://www.ncbi.nlm.nih.gov/pubmed/8626489	http://colonet.informatik.hu-berlin.de/geneview/view/abstract/8626489	We show that STAT3 undergoes IFNalpha-dependent tyrosine phosphorylation and IFNalpha treatment induces protein-DNA complexes that contain STAT3.	IFNalpha|3439@9606	STAT3|6774@9606	0.752648
PMID.dPMID19232485.s14.p0	http://www.ncbi.nlm.nih.gov/pubmed/19232485	http://colonet.informatik.hu-berlin.de/geneview/view/abstract/19232485	We propose that in some cases the application of IFN-alpha could increase the probability of disease progression via overactive STAT3.	STAT3|6774@9606	IFN-alpha|3439@9606	0.642777
PMID.dPMID8626489.s4.p5	http://www.ncbi.nlm.nih.gov/pubmed/8626489	http://colonet.informatik.hu-berlin.de/geneview/view/abstract/8626489	We show that STAT3 undergoes IFNalpha-dependent tyrosine phosphorylation and IFNalpha treatment induces protein-DNA complexes that contain STAT3.	STAT3|6774@9606	IFNalpha|3439@9606	0.583037
PMID.dPMID8626489.s4.p1	http://www.ncbi.nlm.nih.gov/pubmed/8626489	http://colonet.informatik.hu-berlin.de/geneview/view/abstract/8626489	We show that STAT3 undergoes IFNalpha-dependent tyrosine phosphorylation and IFNalpha treatment induces protein-DNA complexes that contain STAT3.	IFNalpha|3439@9606	STAT3|6774@9606	0.54664
PMID.dPMID15944325.s13.p2	http://www.ncbi.nlm.nih.gov/pubmed/15944325	http://colonet.informatik.hu-berlin.de/geneview/view/abstract/15944325	Moreover, DV infection by itself could activate STAT1 and STAT3 through IFN-alpha-dependent and both IFN-alpha-dependent and IFN-alpha-independent mechanisms, respectively.	IFN-alpha|3439@9606	STAT3|6774@9606	0.542603
PMID.dPMID19232485.s1.p0	http://www.ncbi.nlm.nih.gov/pubmed/19232485	http://colonet.informatik.hu-berlin.de/geneview/view/abstract/19232485	Interferon-alpha treatment may negatively influence disease progression in melanoma patients by hyperactivation of STAT3 protein.	STAT3|6774@9606	Interferon-alpha|3439@9606	0.520408
PMID.dPMID10470819.s13.p2	http://www.ncbi.nlm.nih.gov/pubmed/10470819	http://colonet.informatik.hu-berlin.de/geneview/view/abstract/10470819	Furthermore, in vitro experiments in which two independent short-term cultures obtained from freshly dissected meningioma samples were used indicated that Statl and Stat3 are phosphorylated in response to treatment with IFNalpha-2B.	IFNalpha|3439@9606	Stat3|6774@9606	0.500312
PMID.dPMID12817009.s5.p1	http://www.ncbi.nlm.nih.gov/pubmed/12817009	http://colonet.informatik.hu-berlin.de/geneview/view/abstract/12817009	We demonstrate that IFN-alpha will induce the binding of IRF-1 and Stat3 to the respective motifs.	Stat3|6774@9606	IFN-alpha|3439@9606	0.493358
PMID.dPMID16571725.s9.p0	http://www.ncbi.nlm.nih.gov/pubmed/16571725	http://colonet.informatik.hu-berlin.de/geneview/view/abstract/16571725	At the same time, IFNalpha-activated STAT3 supported ISGF-3-dependent induction of antiviral genes.	STAT3|6774@9606	IFNalpha|3439@9606	0.491058
Sentences between STAT2 and IFNA13
PMID.dPMID17559358.s1.p0	http://www.ncbi.nlm.nih.gov/pubmed/17559358	http://colonet.informatik.hu-berlin.de/geneview/view/abstract/17559358	Role of ISGF3 in modulating the anti-hepatitis B virus activity of interferon-alpha in vitro.	interferon-alpha|3439@9606	ISGF3|6773@9606	0.853622
PMID.dPMID10490982.s1.p1	http://www.ncbi.nlm.nih.gov/pubmed/10490982	http://colonet.informatik.hu-berlin.de/geneview/view/abstract/10490982	IFN-alpha activates Stat6 and leads to the formation of Stat2:Stat6 complexes in B cells.	Stat2|6773@9606	IFN-alpha|3439@9606	0.593747
PMID.dPMID9804758.s5.p0	http://www.ncbi.nlm.nih.gov/pubmed/9804758	http://colonet.informatik.hu-berlin.de/geneview/view/abstract/9804758	In addition, STAT2 is activated by IFNalpha, and, together with STAT1 and p48/ISGF3gamma, forms the transcription factor complex ISGF3.	IFNalpha|3439@9606	STAT2|6773@9606	0.58853
PMID.dPMID14722125.s11.p0	http://www.ncbi.nlm.nih.gov/pubmed/14722125	http://colonet.informatik.hu-berlin.de/geneview/view/abstract/14722125	Expression of Stat2 P630L in cells inhibits IFNalpha-stimulated gene expression.	IFNalpha|3439@9606	Stat2|6773@9606	0.568949
PMID.dPMID10490982.s5.p2	http://www.ncbi.nlm.nih.gov/pubmed/10490982	http://colonet.informatik.hu-berlin.de/geneview/view/abstract/10490982	In most cell types, activation of Stat1 and Stat2 by IFN-alpha leads to the formation of either STAT homo-/heterodimers or of the IFN-stimulated gene factor 3 complex composed of Stat1, Stat2, and p48, a non-STAT protein.	IFN-alpha|3439@9606	Stat2|6773@9606	0.566697
PMID.dPMID11408801.s7.p0	http://www.ncbi.nlm.nih.gov/pubmed/11408801	http://colonet.informatik.hu-berlin.de/geneview/view/abstract/11408801	Results showed that Stat1 and Stat2 immunostaining were significantly increased during IFN-alpha treatment.	IFN-alpha|3439@9606	Stat2|6773@9606	0.548129
PMID.dPMID17062732.s9.p0	http://www.ncbi.nlm.nih.gov/pubmed/17062732	http://colonet.informatik.hu-berlin.de/geneview/view/abstract/17062732	Moreover, chromatin immunoprecipitation showed that after IFNalpha stimulation STAT2 binds to ISRE element of PML promoter even in the presence of TSA and thus excluded STAT2-dependent mechanism of TSA effect.	STAT2|6773@9606	IFNalpha|3439@9606	0.495605
PMID.dPMID9218597.s8.p3	http://www.ncbi.nlm.nih.gov/pubmed/9218597	http://colonet.informatik.hu-berlin.de/geneview/view/abstract/9218597	We show that IFN-alpha and IFN-gamma rapidly and efficiently enhanced STAT1, STAT2, p48, and IRF-1 gene expression.	STAT2|6773@9606	IFN-alpha|3439@9606	0.472868
PMID.dPMID10490982.s5.p12	http://www.ncbi.nlm.nih.gov/pubmed/10490982	http://colonet.informatik.hu-berlin.de/geneview/view/abstract/10490982	In most cell types, activation of Stat1 and Stat2 by IFN-alpha leads to the formation of either STAT homo-/heterodimers or of the IFN-stimulated gene factor 3 complex composed of Stat1, Stat2, and p48, a non-STAT protein.	Stat2|6773@9606	IFN-alpha|3439@9606	0.467688
PMID.dPMID9804758.s5.p7	http://www.ncbi.nlm.nih.gov/pubmed/9804758	http://colonet.informatik.hu-berlin.de/geneview/view/abstract/9804758	In addition, STAT2 is activated by IFNalpha, and, together with STAT1 and p48/ISGF3gamma, forms the transcription factor complex ISGF3.	ISGF3|6773@9606	IFNalpha|3439@9606	0.430733
Sentences between IFNA13 and IRF7
PMC.dPMC19557165.s102.p0	http://www.ncbi.nlm.nih.gov/pubmed/19557165	http://colonet.informatik.hu-berlin.de/geneview/view/abstract/19557165	These results indicate that VP35 blocks virus-induced recruitment of IRF7 to Ifn genes.	Ifn|3439@9606	IRF7|3665@9606	0.82456
PMID.dPMID15265881.s1.p0	http://www.ncbi.nlm.nih.gov/pubmed/15265881	http://colonet.informatik.hu-berlin.de/geneview/view/abstract/15265881	Regulation of IFN regulatory factor-7 and IFN-alpha production by enveloped virus and lipopolysaccharide in human plasmacytoid dendritic cells.	IFN-alpha|3439@9606	IFN regulatory factor-7|3665@9606	0.683629
PMID.dPMID11473119.s9.p2	http://www.ncbi.nlm.nih.gov/pubmed/11473119	http://colonet.informatik.hu-berlin.de/geneview/view/abstract/11473119	These data together with the results of two-step chromatin immunoprecipitation strongly suggest that the IRF-3 and IRF-7 bind to IFNA1 promoter as a dimer.	IFNA1|3439@9606	IRF-7|3665@9606	0.641638
PMID.dPMID18505922.s7.p0	http://www.ncbi.nlm.nih.gov/pubmed/18505922	http://colonet.informatik.hu-berlin.de/geneview/view/abstract/18505922	The induction of IRF7 gene by IFNalpha in immortal LFS cells was potentiated by pretreatment with the demethylation agent 5-aza-2'-deoxycytidine.	IFNalpha|3439@9606	IRF7|3665@9606	0.54895
PMC.dPMC17490473.s327.p1	http://www.ncbi.nlm.nih.gov/pubmed/17490473	http://colonet.informatik.hu-berlin.de/geneview/view/abstract/17490473	The molecular pathway that is shared between the arthritis resistant DA.Ncf1E3 rat strain and the arthritis treatment achieved with phytol is the Ifn-╬▓-dependent pathway, which results in the upregulation of Best5, Irf7, Ifit3, Oas1 and Mx2.	Irf7|293624@10116	Ifn|3439@9606	0.535058
PMID.dPMID19557165.s10.p2	http://www.ncbi.nlm.nih.gov/pubmed/19557165	http://colonet.informatik.hu-berlin.de/geneview/view/abstract/19557165	VP35, while not itself a SUMO ligase, increased PIAS1-mediated SUMOylation of IRF7, and repressed Ifn transcription.	Ifn|3439@9606	IRF7|3665@9606	0.485066
PMC.dPMC19557165.s10.p2	http://www.ncbi.nlm.nih.gov/pubmed/19557165	http://colonet.informatik.hu-berlin.de/geneview/view/abstract/19557165	VP35, while not itself a SUMO ligase, increased PIAS1-mediated SUMOylation of IRF7, and repressed Ifn transcription.	Ifn|3439@9606	IRF7|3665@9606	0.485066
PMID.dPMID17357508.s1.p0	http://www.ncbi.nlm.nih.gov/pubmed/17357508	http://colonet.informatik.hu-berlin.de/geneview/view/abstract/17357508	Expression of plasmacytoid dendritic cells, IRF-7, IFN-alpha mRNA in the lesions of psoriasis vulgaris.	IFN-alpha|3439@9606	IRF-7|3665@9606	0.484519
PMID.dPMID17374731.s10.p0	http://www.ncbi.nlm.nih.gov/pubmed/17374731	http://colonet.informatik.hu-berlin.de/geneview/view/abstract/17374731	Blocking this intermediary type I IFN step using specific antisera shows the requirement for IFN-alpha and IFN-beta in the induction of IRF-7 and apoptosis.	IRF-7|3665@9606	IFN-alpha|3439@9606	0.483332
PMID.dPMID17056507.s13.p9	http://www.ncbi.nlm.nih.gov/pubmed/17056507	http://colonet.informatik.hu-berlin.de/geneview/view/abstract/17056507	Taken together, these results suggest that cross-linking BDCA-2, BDCA-4, and CD4 on PDC regulates IFN-alpha production at the level of IRF-7, while the decrease in IFN-alpha production after CD123 cross-linking is due to stimulation of the IL-3R and induction of PDC maturation.	IFN-alpha|3439@9606	IRF-7|3665@9606	0.47986
Sentences between TLR9 and IFNA13
PMC.dPMC19088911.s121.p0	http://www.ncbi.nlm.nih.gov/pubmed/19088911	http://colonet.informatik.hu-berlin.de/geneview/view/abstract/19088911	Efficient endosomal acidification of oligonucleotides that trigger TLR9 attenuates induction of IFN-alpha gene expression.	IFN-alpha|3439@9606	TLR9|81897@10090	140307
PMID.dPMID19501403.s1.p0	http://www.ncbi.nlm.nih.gov/pubmed/19501403	http://colonet.informatik.hu-berlin.de/geneview/view/abstract/19501403	HBsAg inhibits TLR9-mediated activation and IFN-alpha production in plasmacytoid dendritic cells.	IFN-alpha|3439@9606	TLR9|54106@9606	0.726434
PMID.dPMID19794067.s14.p2	http://www.ncbi.nlm.nih.gov/pubmed/19794067	http://colonet.informatik.hu-berlin.de/geneview/view/abstract/19794067	Simultaneous inhibition of both TLR7 and TLR9 completely abrogated IFN-alpha induction.	IFN-alpha|3439@9606	TLR9|54106@9606	0.558252
PMID.dPMID17371961.s5.p2	http://www.ncbi.nlm.nih.gov/pubmed/17371961	http://colonet.informatik.hu-berlin.de/geneview/view/abstract/17371961	We have analyzed the effects of TLR7/TLR9 costimulation on IFN-alpha production by leukocytes and pDCs.	IFN-alpha|3439@9606	TLR9|81897@10090	0.549542
PMID.dPMID20483722.s3.p0	http://www.ncbi.nlm.nih.gov/pubmed/20483722	http://colonet.informatik.hu-berlin.de/geneview/view/abstract/20483722	Recent studies have suggested that TLR9 signaling in early endosomes leads to IFN-alpha production by plasmacytoid dendritic cells (pDCs), whereas TLR9 signaling in late endosomes induces pDC maturation, IL-6, and TNF-alpha secretion.	IFN-alpha|3439@9606	TLR9|54106@9606	0.493094
PMID.dPMID17570328.s9.p0	http://www.ncbi.nlm.nih.gov/pubmed/17570328	http://colonet.informatik.hu-berlin.de/geneview/view/abstract/17570328	TLR9 agonist CpG2216 produced high IFN-alpha but failed to up regulate IFN-gamma singly or in tandem.	IFN-alpha|3439@9606	TLR9|54106@9606	0.418863
PMID.dPMID15383579.s5.p0	http://www.ncbi.nlm.nih.gov/pubmed/15383579	http://colonet.informatik.hu-berlin.de/geneview/view/abstract/15383579	In addition to favoring IFN-alpha release, TLR9 signals B cell activation, proliferation, and IgM production.	TLR9|54106@9606	IFN-alpha|3439@9606	0.402738
PMID.dPMID20205698.s11.p0	http://www.ncbi.nlm.nih.gov/pubmed/20205698	http://colonet.informatik.hu-berlin.de/geneview/view/abstract/20205698	The predominant cell type known to produce IFN-alpha in response to CpG (CpG ODN-2216) and other TLR9 agonists is the pDC.	TLR9|54106@9606	IFN-alpha|3439@9606	0.371358
PMID.dPMID17108047.s8.p5	http://www.ncbi.nlm.nih.gov/pubmed/17108047	http://colonet.informatik.hu-berlin.de/geneview/view/abstract/17108047	A role for Toll-like receptor 9 (TLR9) recognition of Ad was supported by the requirement for viral DNA and efficient endosomal acidification and by the ability of a TLR9-inhibitory oligonucleotide to attenuate IFN-alpha induction.	IFN-alpha|3439@9606	TLR9|54106@9606	0.362659
PMID.dPMID17565046.s6.p0	http://www.ncbi.nlm.nih.gov/pubmed/17565046	http://colonet.informatik.hu-berlin.de/geneview/view/abstract/17565046	Interestingly, we observed that the capacity for potent IFN-alpha-induction by TLR9 ligands like CpG-C and CpG-A is markedly reduced by concurrent small molecule TLR7 stimulation.	TLR9|54106@9606	IFN-alpha|3439@9606	0.335204
Sentences between TNFSF10 and IFNA13
PMID.dPMID16225956.s15.p0	http://www.ncbi.nlm.nih.gov/pubmed/16225956	http://colonet.informatik.hu-berlin.de/geneview/view/abstract/16225956	The synergistic effect of TRAIL and IFNalpha could be blocked by inhibiting caspase-8 expression.	IFNalpha|3439@9606	TRAIL|8743@9606	102442
PMID.dPMID12817000.s1.p0	http://www.ncbi.nlm.nih.gov/pubmed/12817000	http://colonet.informatik.hu-berlin.de/geneview/view/abstract/12817000	Plasmacytoid dendritic cell-derived IFN-alpha induces TNF-related apoptosis-inducing ligand/Apo-2L-mediated antitumor activity by human monocytes following CpG oligodeoxynucleotide stimulation.	Apo-2L|8743@9606	IFN-alpha|3439@9606	0.793533
PMID.dPMID19995562.s6.p0	http://www.ncbi.nlm.nih.gov/pubmed/19995562	http://colonet.informatik.hu-berlin.de/geneview/view/abstract/19995562	The TRAIL production induced by lactobacilli partially depends on IFN-alpha and IFN-gamma.	IFN-alpha|3439@9606	TRAIL|8743@9606	0.739746
PMID.dPMID15961346.s10.p0	http://www.ncbi.nlm.nih.gov/pubmed/15961346	http://colonet.informatik.hu-berlin.de/geneview/view/abstract/15961346	These results indicate that IFNalpha-induced enhancement of TRAIL expression and of TRAIL-mediated apoptosis may amplify the abnormal apoptotic process in SLE.	TRAIL|8743@9606	IFNalpha|3439@9606	0.632599
PMID.dPMID15240676.s7.p0	http://www.ncbi.nlm.nih.gov/pubmed/15240676	http://colonet.informatik.hu-berlin.de/geneview/view/abstract/15240676	Of the two classes, IFN-alpha production and TRAIL/Apo-2L-mediated killing of tumor cells was greatest with CpG-A ODN.	TRAIL|8743@9606	IFN-alpha|3439@9606	0.582554
PMID.dPMID15604261.s7.p0	http://www.ncbi.nlm.nih.gov/pubmed/15604261	http://colonet.informatik.hu-berlin.de/geneview/view/abstract/15604261	IFNalpha stimulated marked increases in TRAIL mRNA and protein in the majority of IFN-sensitive and IFN-resistant cell lines.	TRAIL|8743@9606	IFNalpha|3439@9606	0.568023
PMID.dPMID15585621.s13.p2	http://www.ncbi.nlm.nih.gov/pubmed/15585621	http://colonet.informatik.hu-berlin.de/geneview/view/abstract/15585621	Our results suggest that modulation of TRAIL/TRAIL receptor-mediated cytotoxic pathway might partially contribute to the anti-HCC effect of IFNalpha and 5-FU combination therapy.	IFNalpha|3439@9606	TRAIL|8743@9606	0.533717
PMID.dPMID15585621.s13.p1	http://www.ncbi.nlm.nih.gov/pubmed/15585621	http://colonet.informatik.hu-berlin.de/geneview/view/abstract/15585621	Our results suggest that modulation of TRAIL/TRAIL receptor-mediated cytotoxic pathway might partially contribute to the anti-HCC effect of IFNalpha and 5-FU combination therapy.	IFNalpha|3439@9606	TRAIL|8743@9606	0.533717
PMID.dPMID12406882.s12.p0	http://www.ncbi.nlm.nih.gov/pubmed/12406882	http://colonet.informatik.hu-berlin.de/geneview/view/abstract/12406882	The proapoptotic effect of AZT and IFN-alpha in PEL occurs through the concomitant activation of TRAIL and blockade of NF-kappaB and represents a novel antiviral therapy for a virally mediated tumor.	TRAIL|8743@9606	IFN-alpha|3439@9606	0.415994
PMID.dPMID12097384.s8.p0	http://www.ncbi.nlm.nih.gov/pubmed/12097384	http://colonet.informatik.hu-berlin.de/geneview/view/abstract/12097384	The latter cytotoxicity correlated with APO2L/TRAIL expression and was significantly enhanced in the presence of IFN-alpha.	IFN-alpha|3439@9606	TRAIL|8743@9606	0.403643
Sentences between SOAT1 and IFNA13
PMID.dPMID10490982.s4.p0	http://www.ncbi.nlm.nih.gov/pubmed/10490982	http://colonet.informatik.hu-berlin.de/geneview/view/abstract/10490982	The biologic activities of IFN-alpha are mediated by its binding to a multicomponent receptor complex resulting in the activation of the Janus kinase-STAT signaling pathway.	STAT|6646@9606	IFN-alpha|3439@9606	0.903031
PMID.dPMID11408801.s12.p0	http://www.ncbi.nlm.nih.gov/pubmed/11408801	http://colonet.informatik.hu-berlin.de/geneview/view/abstract/11408801	Analysis of cell fractions showed that IFN-alpha increased Stat protein both in cytoplasm and nucleoplasm of the cells.	Stat|6646@9606	IFN-alpha|3439@9606	0.884024
PMID.dPMID17141757.s3.p0	http://www.ncbi.nlm.nih.gov/pubmed/17141757	http://colonet.informatik.hu-berlin.de/geneview/view/abstract/17141757	IFNalpha activates JAK-STAT signaling, followed by up-regulation of a cohort of genes.	STAT|6646@9606	IFNalpha|3439@9606	0.696214
PMID.dPMID10490982.s5.p17	http://www.ncbi.nlm.nih.gov/pubmed/10490982	http://colonet.informatik.hu-berlin.de/geneview/view/abstract/10490982	In most cell types, activation of Stat1 and Stat2 by IFN-alpha leads to the formation of either STAT homo-/heterodimers or of the IFN-stimulated gene factor 3 complex composed of Stat1, Stat2, and p48, a non-STAT protein.	STAT|6646@9606	IFN-alpha|3439@9606	0.57337
PMID.dPMID11601909.s4.p0	http://www.ncbi.nlm.nih.gov/pubmed/11601909	http://colonet.informatik.hu-berlin.de/geneview/view/abstract/11601909	An earlier report suggested that HCV inhibits IFNalpha-induced signal transduction through the Jak/Stat pathway by preventing the formation of the transacting factor ISGF3 complex, although the effect on downstream pathway and the specific viral protein responsible for inhibition of IFNalpha-mediated signal transduction were not elucidated.	Stat|6646@9606	IFNalpha|3439@9606	0.559985
PMID.dPMID11408801.s11.p0	http://www.ncbi.nlm.nih.gov/pubmed/11408801	http://colonet.informatik.hu-berlin.de/geneview/view/abstract/11408801	In a carcinoid tumor cell line, Bon1, IFN-alpha dose-dependently increased the Stat expression.	Stat|6646@9606	IFN-alpha|3439@9606	0.520189
PMID.dPMID17141757.s12.p0	http://www.ncbi.nlm.nih.gov/pubmed/17141757	http://colonet.informatik.hu-berlin.de/geneview/view/abstract/17141757	Therefore we suggest that the genes that are regulated by both the STAT and the PI3K pathways by IFNalpha in these cells may be specifically involved in the induction of apoptosis.	IFNalpha|3439@9606	STAT|6646@9606	0.508176
PMID.dPMID9831114.s10.p10	http://www.ncbi.nlm.nih.gov/pubmed/9831114	http://colonet.informatik.hu-berlin.de/geneview/view/abstract/9831114	We have shown that both IFN-alpha and IFN-gamma can induce Stat protein binding (particularly Stat3 and Stat5) to their cognate DNA consensus sites and increase Stat protein steady state levels in BON cells.	Stat|6646@9606	IFN-alpha|3439@9606	0.4779
PMID.dPMID11278370.s11.p0	http://www.ncbi.nlm.nih.gov/pubmed/11278370	http://colonet.informatik.hu-berlin.de/geneview/view/abstract/11278370	These results suggest that IFN-alpha stimulation of Stat-dependent genes is necessary, but not sufficient, for this cytokine to induce apoptosis.	Stat|6646@9606	IFN-alpha|3439@9606	0.475906
PMID.dPMID10068671.s1.p0	http://www.ncbi.nlm.nih.gov/pubmed/10068671	http://colonet.informatik.hu-berlin.de/geneview/view/abstract/10068671	Interferon-alpha activates multiple STAT proteins and upregulates proliferation-associated IL-2Ralpha, c-myc, and pim-1 genes in human T cells.	STAT|6646@9606	Interferon-alpha|3439@9606	0.45032
Sentences between FAS and IFNA13
PMID.dPMID14647422.s11.p0	http://www.ncbi.nlm.nih.gov/pubmed/14647422	http://colonet.informatik.hu-berlin.de/geneview/view/abstract/14647422	Thus, our data indicate that IFNalpha-based BCC therapy induces Fas expression and apoptosis through interfering with Mek function.	Fas|355@9606	IFNalpha|3439@9606	129825
PMID.dPMID12761580.s8.p0	http://www.ncbi.nlm.nih.gov/pubmed/12761580	http://colonet.informatik.hu-berlin.de/geneview/view/abstract/12761580	Taken together, our findings suggest that activated NF-kappaB induced by the crosstalk between TNF and IFN-alpha is a novel pro-apoptotic signal acting via enhancement of Fas expression.	Fas|355@9606	IFN-alpha|3439@9606	115397
PMID.dPMID14647422.s9.p0	http://www.ncbi.nlm.nih.gov/pubmed/14647422	http://colonet.informatik.hu-berlin.de/geneview/view/abstract/14647422	We further show that IFNalpha induces expression of Fas in BCC cells through interfering with Mek function.	Fas|355@9606	IFNalpha|3439@9606	110923
PMID.dPMID14647422.s1.p0	http://www.ncbi.nlm.nih.gov/pubmed/14647422	http://colonet.informatik.hu-berlin.de/geneview/view/abstract/14647422	IFNalpha induces Fas expression and apoptosis in hedgehog pathway activated BCC cells through inhibiting Ras-Erk signaling.	Fas|355@9606	IFNalpha|3439@9606	0.992058
PMID.dPMID17652735.s11.p1	http://www.ncbi.nlm.nih.gov/pubmed/17652735	http://colonet.informatik.hu-berlin.de/geneview/view/abstract/17652735	IFN-alpha and IFN-gamma pretreatment increased Fas expression.	Fas|355@9606	IFN-alpha|3439@9606	0.720432
PMID.dPMID17045692.s13.p0	http://www.ncbi.nlm.nih.gov/pubmed/17045692	http://colonet.informatik.hu-berlin.de/geneview/view/abstract/17045692	Our results indicated that IFNalpha/5-FU combination treatment enhances the induction of apoptosis and the cytotoxic effect of PBMCs via the Fas/FasL pathway.	Fas|355@9606	IFNalpha|3439@9606	0.690648
PMID.dPMID9028327.s14.p3	http://www.ncbi.nlm.nih.gov/pubmed/9028327	http://colonet.informatik.hu-berlin.de/geneview/view/abstract/9028327	Our findings suggest that the Fas-R/Fas-ligand system might be involved in the immunologic regulation of CML progenitor growth and that its effect can be amplified by IFN-alpha.	IFN-alpha|3439@9606	Fas|355@9606	0.574786
PMID.dPMID15580300.s10.p3	http://www.ncbi.nlm.nih.gov/pubmed/15580300	http://colonet.informatik.hu-berlin.de/geneview/view/abstract/15580300	IFNalpha-induced PML was unable to recruit p53 into nuclear bodies and its downregulation by siRNA did not alter CD95 expression.	CD95|355@9606	IFNalpha|3439@9606	0.445835
PMID.dPMID17045692.s14.p1	http://www.ncbi.nlm.nih.gov/pubmed/17045692	http://colonet.informatik.hu-berlin.de/geneview/view/abstract/17045692	The Fas/FasL pathway seems, at least in part, to contribute to the anti-tumor effects of IFNalpha/5-FU against HCCs.	IFNalpha|3439@9606	Fas|355@9606	0.410606
PMID.dPMID12761580.s1.p0	http://www.ncbi.nlm.nih.gov/pubmed/12761580	http://colonet.informatik.hu-berlin.de/geneview/view/abstract/12761580	TNF combined with IFN-alpha accelerates NF-kappaB-mediated apoptosis through enhancement of Fas expression in colon cancer cells.	Fas|355@9606	IFN-alpha|3439@9606	0.401937
Sentences between IRF1 and IFNA13
PMID.dPMID17062732.s7.p0	http://www.ncbi.nlm.nih.gov/pubmed/17062732	http://colonet.informatik.hu-berlin.de/geneview/view/abstract/17062732	Moreover, IFNalpha induction of IRF-1 was also inhibited by TSA, although incompletely.	IRF-1|3659@9606	IFNalpha|3439@9606	0.835789
PMID.dPMID12817009.s9.p1	http://www.ncbi.nlm.nih.gov/pubmed/12817009	http://colonet.informatik.hu-berlin.de/geneview/view/abstract/12817009	The data show that IFN-alpha induces the IL-10 gene via a module consisting of interdependent IRF-1 and Stat3 motifs.	IRF-1|3659@9606	IFN-alpha|3439@9606	0.801673
PMID.dPMID9218597.s8.p6	http://www.ncbi.nlm.nih.gov/pubmed/9218597	http://colonet.informatik.hu-berlin.de/geneview/view/abstract/9218597	We show that IFN-alpha and IFN-gamma rapidly and efficiently enhanced STAT1, STAT2, p48, and IRF-1 gene expression.	IRF-1|3659@9606	IFN-alpha|3439@9606	0.678084
PMID.dPMID12817009.s5.p0	http://www.ncbi.nlm.nih.gov/pubmed/12817009	http://colonet.informatik.hu-berlin.de/geneview/view/abstract/12817009	We demonstrate that IFN-alpha will induce the binding of IRF-1 and Stat3 to the respective motifs.	IRF-1|3659@9606	IFN-alpha|3439@9606	0.605343
PMID.dPMID9393879.s10.p1	http://www.ncbi.nlm.nih.gov/pubmed/9393879	http://colonet.informatik.hu-berlin.de/geneview/view/abstract/9393879	RA stimulates the IFN regulatory factor 1 (IRF-1) gene expression directly through the GAS motif and causes the induction and secretion of IFNalpha.	IFNalpha|3439@9606	IFN regulatory factor 1|3659@9606	0.562563
PMID.dPMID14581002.s11.p0	http://www.ncbi.nlm.nih.gov/pubmed/14581002	http://colonet.informatik.hu-berlin.de/geneview/view/abstract/14581002	Our results suggest that IFN-alpha and IL-12 may enhance innate and Th1 immune responses by inducing IRF-1, IRF-4, and IRF-8 gene expression.	IRF-1|3659@9606	IFN-alpha|3439@9606	0.557102
PMID.dPMID9393879.s10.p2	http://www.ncbi.nlm.nih.gov/pubmed/9393879	http://colonet.informatik.hu-berlin.de/geneview/view/abstract/9393879	RA stimulates the IFN regulatory factor 1 (IRF-1) gene expression directly through the GAS motif and causes the induction and secretion of IFNalpha.	IFNalpha|3439@9606	IRF-1|3659@9606	0.520995
PMID.dPMID17691025.s8.p0	http://www.ncbi.nlm.nih.gov/pubmed/17691025	http://colonet.informatik.hu-berlin.de/geneview/view/abstract/17691025	However, in the presence of anti-IFN-alpha antibodies, live RSV induced detectable IRF-1 mRNA expression in neonate MCs.	IRF-1|3659@9606	IFN-alpha|3439@9606	0.441285
PMID.dPMID8335353.s7.p0	http://www.ncbi.nlm.nih.gov/pubmed/8335353	http://colonet.informatik.hu-berlin.de/geneview/view/abstract/8335353	IRF-1 mRNA is expressed at high levels in monocytes and is regulated by both LPS and priming cytokines, but its expression alone does not correlate with the induction of IFN-alpha 2 expression.	IFN-alpha|3439@9606	IRF-1|3659@9606	0.420806
PMID.dPMID17617740.s9.p1	http://www.ncbi.nlm.nih.gov/pubmed/17617740	http://colonet.informatik.hu-berlin.de/geneview/view/abstract/17617740	Together, our results demonstrate that IFNalpha induces TRAIL expression via a STAT-1/IRF-1-dependent mechanism in human bladder cancer cells, and this induction of TRAIL plays an important role in IFNalpha-induced cell killing.	IRF-1|3659@9606	IFNalpha|3439@9606	0.416352
Sentences between IFNA13 and TLR7
PMID.dPMID16887967.s1.p0	http://www.ncbi.nlm.nih.gov/pubmed/16887967	http://colonet.informatik.hu-berlin.de/geneview/view/abstract/16887967	TLR7 ligands induce higher IFN-alpha production in females.	IFN-alpha|3439@9606	TLR7|51284@9606	117533
PMID.dPMID18439103.s12.p0	http://www.ncbi.nlm.nih.gov/pubmed/18439103	http://colonet.informatik.hu-berlin.de/geneview/view/abstract/18439103	Thus, the results demonstrate that the TLR7 agonist 852A inhibits in vitro proliferation of some tumor cells in a pDC-dependent and IFN-alpha-dependent manner and can delay tumor growth in vivo.	IFN-alpha|3439@9606	TLR7|51284@9606	0.769028
PMID.dPMID20034855.s4.p0	http://www.ncbi.nlm.nih.gov/pubmed/20034855	http://colonet.informatik.hu-berlin.de/geneview/view/abstract/20034855	The result showed that SAT05f could down-regulate TLR7/9-dependent IFN-alpha production in cultured human PBMC stimulated by inactivated Flu virus PR8 or HSV-1 or CpG ODN or imiquimod, protect d-GalN-treated mice from lethal shock induced by TLR9 agonist, not by TLR3/4 agonist.	IFN-alpha|3439@9606	TLR7|51284@9606	0.709808
PMC.dPMC22606294.s63.p0	http://www.ncbi.nlm.nih.gov/pubmed/22606294	http://colonet.informatik.hu-berlin.de/geneview/view/abstract/22606294	Myxoma Virus Induction Of Ifn-╬▒ And Tnf In Human Pdcs Is Inhibited By Chloroquine pDCs utilize TLR7 and TLR9 to detect viral nucleic acids and initiate an antiviral response.	TLR7|170743@10090	Ifn|3439@9606	0.687269
PMID.dPMID16887967.s12.p0	http://www.ncbi.nlm.nih.gov/pubmed/16887967	http://colonet.informatik.hu-berlin.de/geneview/view/abstract/16887967	Our data reveal for the first time a profound sex-dependent pathway of TLR7-induced IFN-alpha with higher production in females.	IFN-alpha|3439@9606	TLR7|51284@9606	0.533446
PMID.dPMID18025223.s7.p0	http://www.ncbi.nlm.nih.gov/pubmed/18025223	http://colonet.informatik.hu-berlin.de/geneview/view/abstract/18025223	Regardless of viral replication, PDCs secreted cytokines after contact with HCMV, including IFN-alpha secretion that was blocked by inhibitory CpG, suggesting an engagement of the TLR7 and/or TLR9 pathways.	TLR7|51284@9606	IFN-alpha|3439@9606	0.484153
PMID.dPMID18250417.s9.p0	http://www.ncbi.nlm.nih.gov/pubmed/18250417	http://colonet.informatik.hu-berlin.de/geneview/view/abstract/18250417	Furthermore, the sequence-specific IFN-alpha induction profile in human PBMCs was accurately modeled by a sequence-specific activation of murine TLR7 in mouse macrophages.	TLR7|170743@10090	IFN-alpha|3439@9606	0.481477
PMID.dPMID17565046.s11.p3	http://www.ncbi.nlm.nih.gov/pubmed/17565046	http://colonet.informatik.hu-berlin.de/geneview/view/abstract/17565046	These data indicate that TLR7 and TLR9 costimulation do not combine synergistically for IFN-alpha induction and demonstrate that, instead, a negative feedback mechanism has evolved, possibly to prevent levels of IFN-alpha secretion potentially detrimental to the host.	IFN-alpha|3439@9606	TLR7|51284@9606	0.455004
PMC.dPMC18439305.s209.p3	http://www.ncbi.nlm.nih.gov/pubmed/18439305	http://colonet.informatik.hu-berlin.de/geneview/view/abstract/18439305	A. Photomicrographs showing localization of Ifna1, Ifit1, Irf7 and Tlr7.	Tlr7|170743@10090	Ifna1|15962@10090	0.429863
PMC.dPMC18439305.s210.p3	http://www.ncbi.nlm.nih.gov/pubmed/18439305	http://colonet.informatik.hu-berlin.de/geneview/view/abstract/18439305	In the small intestine, all signals for Ifna1, Ifit1, Irf7 and Tlr7 were detected in Paneth cells.	Tlr7|170743@10090	Ifna1|15962@10090	0.358079
Sentences between IL8 and IFNA13
PMID.dPMID8915952.s6.p0	http://www.ncbi.nlm.nih.gov/pubmed/8915952	http://colonet.informatik.hu-berlin.de/geneview/view/abstract/8915952	The results for IL-8 and IFN-alpha differed depending on the method of reporting.	IFN-alpha|3439@9606	IL-8|3576@9606	0.753244
PMID.dPMID8746785.s8.p0	http://www.ncbi.nlm.nih.gov/pubmed/8746785	http://colonet.informatik.hu-berlin.de/geneview/view/abstract/8746785	We next found that IFN-alpha enhanced IL-1 alpha-augmented neutrophil-mediated anticandidal action while marginally enhancing IL-8- and IL-1 beta-mediated reactions.	IL-8|3576@9606	IFN-alpha|3439@9606	0.697644
PMID.dPMID8915952.s1.p0	http://www.ncbi.nlm.nih.gov/pubmed/8915952	http://colonet.informatik.hu-berlin.de/geneview/view/abstract/8915952	Interleukin-1 alpha, interleukin-8 and interferon-alpha levels in gingival crevicular fluid.	interferon-alpha|3439@9606	interleukin-8|3576@9606	0.665629
PMID.dPMID9030876.s9.p1	http://www.ncbi.nlm.nih.gov/pubmed/9030876	http://colonet.informatik.hu-berlin.de/geneview/view/abstract/9030876	IFN-alpha significantly increased plasma concentrations of IL-6, IL-8 and IL-10.	IL-8|3576@9606	IFN-alpha|3439@9606	0.655903
PMID.dPMID9537260.s5.p1	http://www.ncbi.nlm.nih.gov/pubmed/9537260	http://colonet.informatik.hu-berlin.de/geneview/view/abstract/9537260	Furthermore, we report that IFN-alpha and IFN-beta did not inhibit steady-state IL-8 production.	IL-8|3576@9606	IFN-alpha|3439@9606	0.597127
PMID.dPMID15300216.s11.p0	http://www.ncbi.nlm.nih.gov/pubmed/15300216	http://colonet.informatik.hu-berlin.de/geneview/view/abstract/15300216	However, IFN-alpha generation was CpG specific as was increased IL-8 levels.	IL-8|3576@9606	IFN-alpha|3439@9606	0.535712
PMID.dPMID8932979.s12.p1	http://www.ncbi.nlm.nih.gov/pubmed/8932979	http://colonet.informatik.hu-berlin.de/geneview/view/abstract/8932979	IFN-alpha both enhanced and inhibited IL-6 and IL-8 responses in combination with E. coli, depending on the order of stimulant addition.	IL-8|3576@9606	IFN-alpha|3439@9606	0.493022
PMID.dPMID18240301.s1.p3	http://www.ncbi.nlm.nih.gov/pubmed/18240301	http://colonet.informatik.hu-berlin.de/geneview/view/abstract/18240301	Astrocytes produce interferon-alpha and CXCL10, but not IL-6 or CXCL8, in Aicardi-Gouti├¿res syndrome.	CXCL8|3576@9606	interferon-alpha|3439@9606	0.468697
PMID.dPMID15720891.s6.p2	http://www.ncbi.nlm.nih.gov/pubmed/15720891	http://colonet.informatik.hu-berlin.de/geneview/view/abstract/15720891	Blood was taken for leucocyte count, CRP, ESR, IL-6, IL-8, IFN-alpha and TNF-alpha on the day of admission.	IFN-alpha|3439@9606	IL-8|3576@9606	0.449665
PMID.dPMID12774392.s6.p3	http://www.ncbi.nlm.nih.gov/pubmed/12774392	http://colonet.informatik.hu-berlin.de/geneview/view/abstract/12774392	The LBZ injection could promote IFN-alpha, IFN-gamma, TNF-alpha inductions of PBMCs, but had no effect on IL-8.	IL-8|3576@9606	IFN-alpha|3439@9606	0.44092
Sentences between CD4 and IFNA13
PMID.dPMID16840343.s10.p1	http://www.ncbi.nlm.nih.gov/pubmed/16840343	http://colonet.informatik.hu-berlin.de/geneview/view/abstract/16840343	Given that the IFN-alpha/APOBEC3G pathway has potent anti-HIV-1 capability in resting CD4 T cells, augmentation of this innate immunity barrier could prevent residual HIV-1 replication in its native reservoir in the post-highly active antiretroviral therapy era.	CD4|920@9606	IFN-alpha|3439@9606	0.798587
PMID.dPMID12699408.s11.p1	http://www.ncbi.nlm.nih.gov/pubmed/12699408	http://colonet.informatik.hu-berlin.de/geneview/view/abstract/12699408	These results indicate that IFN-alpha by itself enhances CD154 expression in CD4+ T cells independently of the induction of IFN-gamma mRNA expression.	CD4|920@9606	IFN-alpha|3439@9606	0.657553
PMID.dPMID8345204.s11.p0	http://www.ncbi.nlm.nih.gov/pubmed/8345204	http://colonet.informatik.hu-berlin.de/geneview/view/abstract/8345204	Antibodies against CD4, however, did not induce monocytes to produce IFN-alpha.	IFN-alpha|3439@9606	CD4|920@9606	0.630565
PMID.dPMID16840343.s7.p0	http://www.ncbi.nlm.nih.gov/pubmed/16840343	http://colonet.informatik.hu-berlin.de/geneview/view/abstract/16840343	Interestingly, short-time treatments of newly infected resting CD4 T cells with IFN-alpha will significantly inactivate human immunodeficiency virus type 1 (HIV-1) at its early stage.	IFN-alpha|3439@9606	CD4|920@9606	0.622829
PMID.dPMID15470074.s10.p0	http://www.ncbi.nlm.nih.gov/pubmed/15470074	http://colonet.informatik.hu-berlin.de/geneview/view/abstract/15470074	The major contributor of IFN-alpha was the CD4-CD11c+B220+ IPDC subpopulation.	CD4|12504@10090	IFN-alpha|3439@9606	0.622809
PMID.dPMID1680935.s8.p0	http://www.ncbi.nlm.nih.gov/pubmed/1680935	http://colonet.informatik.hu-berlin.de/geneview/view/abstract/1680935	CD4+ T cells and B cells may release sIL-2R when these cells are stimulated with IFN-alpha.	IFN-alpha|3439@9606	CD4|920@9606	0.565636
PMID.dPMID20206223.s10.p0	http://www.ncbi.nlm.nih.gov/pubmed/20206223	http://colonet.informatik.hu-berlin.de/geneview/view/abstract/20206223	In conclusion, the present results indicate that iHIV-1 impairs the in vitro generation of functional DCs from PBMCs through the induction of IFN-alpha from plasmacytoid DCs in a CD4-dependent fashion in the absence of TNF.	CD4|920@9606	IFN-alpha|3439@9606	0.554636
PMID.dPMID8345204.s1.p0	http://www.ncbi.nlm.nih.gov/pubmed/8345204	http://colonet.informatik.hu-berlin.de/geneview/view/abstract/8345204	Induction of IFN-alpha by HIV-1 in monocyte-enriched PBMC requires gp120-CD4 interaction but not virus replication.	CD4|920@9606	IFN-alpha|3439@9606	0.538189
PMID.dPMID16791012.s7.p0	http://www.ncbi.nlm.nih.gov/pubmed/16791012	http://colonet.informatik.hu-berlin.de/geneview/view/abstract/16791012	IFN-alpha inhibited spontaneous apoptosis of CD4 and CD8 T lymphocytes.	CD4|920@9606	IFN-alpha|3439@9606	0.527506
PMID.dPMID1695643.s1.p0	http://www.ncbi.nlm.nih.gov/pubmed/1695643	http://colonet.informatik.hu-berlin.de/geneview/view/abstract/1695643	A distinct population of nonphagocytic and low level CD4+ null lymphocytes produce IFN-alpha after stimulation by herpes simplex virus-infected cells.	IFN-alpha|3439@9606	CD4|920@9606	0.44686
Sentences between EIF2AK2 and IFNA13
PMID.dPMID18535617.s1.p0	http://www.ncbi.nlm.nih.gov/pubmed/18535617	http://colonet.informatik.hu-berlin.de/geneview/view/abstract/18535617	Dual induction of PKR with E2F-1 and IFN-alpha to enhance gene therapy against hepatocellular carcinoma.	IFN-alpha|3439@9606	PKR|5610@9606	0.603314
PMID.dPMID7568028.s10.p0	http://www.ncbi.nlm.nih.gov/pubmed/7568028	http://colonet.informatik.hu-berlin.de/geneview/view/abstract/7568028	Interestingly, while IFN-alpha induction by dsRNA was impaired in PKR-deficient cells, IFN-beta induction remained intact.	PKR|5610@9606	IFN-alpha|3439@9606	0.545419
PMID.dPMID10745229.s4.p0	http://www.ncbi.nlm.nih.gov/pubmed/10745229	http://colonet.informatik.hu-berlin.de/geneview/view/abstract/10745229	Since variability of ISDR was shown to correlate with nonresponsiveness to IFN-alpha therapy in chronically HCV-infected patients, it has been suggested that prototype ISDR might be a viral inhibitor of cellular PKR.	PKR|5610@9606	IFN-alpha|3439@9606	0.417269
PMID.dPMID10386860.s9.p0	http://www.ncbi.nlm.nih.gov/pubmed/10386860	http://colonet.informatik.hu-berlin.de/geneview/view/abstract/10386860	The persistently infected cell lines, P3HR-MP2 and Akata-MP2, showed poor induction of 2',5'-OAS and PKR in response to IFN-alpha.	IFN-alpha|3439@9606	PKR|5610@9606	0.39651
PMID.dPMID10745229.s3.p4	http://www.ncbi.nlm.nih.gov/pubmed/10745229	http://colonet.informatik.hu-berlin.de/geneview/view/abstract/10745229	The hepatitis C virus (HCV) interferon-alpha (IFN-alpha) sensitivity-determining region (ISDR) has been shown to suppress double-stranded RNA-dependent protein kinase (PKR) activity in vitro in a yeast PKR expression system.	PKR|5610@9606	IFN-alpha|3439@9606	0.349253
PMID.dPMID10745229.s3.p3	http://www.ncbi.nlm.nih.gov/pubmed/10745229	http://colonet.informatik.hu-berlin.de/geneview/view/abstract/10745229	The hepatitis C virus (HCV) interferon-alpha (IFN-alpha) sensitivity-determining region (ISDR) has been shown to suppress double-stranded RNA-dependent protein kinase (PKR) activity in vitro in a yeast PKR expression system.	PKR|5610@9606	interferon-alpha|3439@9606	0.325434
PMID.dPMID10745229.s3.p2	http://www.ncbi.nlm.nih.gov/pubmed/10745229	http://colonet.informatik.hu-berlin.de/geneview/view/abstract/10745229	The hepatitis C virus (HCV) interferon-alpha (IFN-alpha) sensitivity-determining region (ISDR) has been shown to suppress double-stranded RNA-dependent protein kinase (PKR) activity in vitro in a yeast PKR expression system.	PKR|5610@9606	IFN-alpha|3439@9606	0.318793
PMC.dPMC22574220.s247.p20	http://www.ncbi.nlm.nih.gov/pubmed/22574220	http://colonet.informatik.hu-berlin.de/geneview/view/abstract/22574220	Primer sequences were designed to span exon-to-exon and were as follows: ╬▓-actin forward, [gene: TTGCTGACAGGATGCAGAAG], ╬▓-actin reverse, [gene: GTACTTGCGCTCAGGAGGAG]; baff forward, [gene: CAGGAACAGACGCGCTTTC], baff reverse, [gene: GTTGAGAATGGCGGCATCC]; tnf-╬▒ forward, [gene: GCCACCACGCTCTTCTGTCT], tnf-╬▒ reverse, [gene: TCTGGGCCATAGAACTGATGAGA]; pkr forward, [gene: TGAGCGCCCCCCATCT], pkr revers…	ifn|3439@9606	pkr|19106@10090	0.318655
PMC.dPMC22574220.s247.p19	http://www.ncbi.nlm.nih.gov/pubmed/22574220	http://colonet.informatik.hu-berlin.de/geneview/view/abstract/22574220	Primer sequences were designed to span exon-to-exon and were as follows: ╬▓-actin forward, [gene: TTGCTGACAGGATGCAGAAG], ╬▓-actin reverse, [gene: GTACTTGCGCTCAGGAGGAG]; baff forward, [gene: CAGGAACAGACGCGCTTTC], baff reverse, [gene: GTTGAGAATGGCGGCATCC]; tnf-╬▒ forward, [gene: GCCACCACGCTCTTCTGTCT], tnf-╬▒ reverse, [gene: TCTGGGCCATAGAACTGATGAGA]; pkr forward, [gene: TGAGCGCCCCCCATCT], pkr revers…	ifn|3439@9606	pkr|19106@10090	0.318096
PMID.dPMID16027772.s11.p9	http://www.ncbi.nlm.nih.gov/pubmed/16027772	http://colonet.informatik.hu-berlin.de/geneview/view/abstract/16027772	The STAT1, STAT2, ISGF3-gamma, 2'5'-OAS, PKR mRNA levels were upregulated by IFNalpha-2b.	IFNalpha|3439@9606	PKR|5610@9606	0.316287
Sentences between BCL2 and IFNA13
PMID.dPMID10561278.s12.p0	http://www.ncbi.nlm.nih.gov/pubmed/10561278	http://colonet.informatik.hu-berlin.de/geneview/view/abstract/10561278	CRA/IFNalpha decreased bcl-2 expression in vitro and in PBMCs.	bcl-2|596@9606	IFNalpha|3439@9606	114834
PMID.dPMID10561278.s15.p0	http://www.ncbi.nlm.nih.gov/pubmed/10561278	http://colonet.informatik.hu-berlin.de/geneview/view/abstract/10561278	CRA/IFNalpha can modulate bcl-2 expression in vitro and demonstrates similar biologic activity in patients.	bcl-2|596@9606	IFNalpha|3439@9606	103134
PMID.dPMID16270532.s8.p0	http://www.ncbi.nlm.nih.gov/pubmed/16270532	http://colonet.informatik.hu-berlin.de/geneview/view/abstract/16270532	While, IFN-alpha did not affect the level of Bcl-2 protein expression during this cultivation time.	Bcl-2|596@9606	IFN-alpha|3439@9606	0.774237
PMID.dPMID10561278.s5.p0	http://www.ncbi.nlm.nih.gov/pubmed/10561278	http://colonet.informatik.hu-berlin.de/geneview/view/abstract/10561278	Pharmacodynamic studies were performed to determine whether CRA and IFNalpha could modulate bcl-2 expression in vitro and in patients.	bcl-2|596@9606	IFNalpha|3439@9606	0.574028
PMID.dPMID10561278.s8.p0	http://www.ncbi.nlm.nih.gov/pubmed/10561278	http://colonet.informatik.hu-berlin.de/geneview/view/abstract/10561278	The effect of CRA/IFNalpha on bcl-2 expression was assessed in vitro and in peripheral-blood mononuclear cells (PBMCs) by immunoblotting.	bcl-2|596@9606	IFNalpha|3439@9606	0.542871
PMID.dPMID12881711.s11.p3	http://www.ncbi.nlm.nih.gov/pubmed/12881711	http://colonet.informatik.hu-berlin.de/geneview/view/abstract/12881711	We conclude that IFNalpha induces Bak and Bax activation via distinct mechanisms involving an unknown protease, and that their activation is regulated by Bcl-2.	Bcl-2|596@9606	IFNalpha|3439@9606	0.487218
PMID.dPMID10561278.s16.p1	http://www.ncbi.nlm.nih.gov/pubmed/10561278	http://colonet.informatik.hu-berlin.de/geneview/view/abstract/10561278	Further studies will determine the activity of CRA/IFNalpha/TAX and validate the assessment of bcl-2 in PBMCs as a marker of tumor response.	bcl-2|596@9606	IFNalpha|3439@9606	0.474548
PMID.dPMID10352242.s8.p3	http://www.ncbi.nlm.nih.gov/pubmed/10352242	http://colonet.informatik.hu-berlin.de/geneview/view/abstract/10352242	Instead, IFN-alpha and IFN-beta, but not IFN-gamma, significantly increase the levels of the survival protein Bcl-2, and to a lesser extent, Bcl-xL expression.	Bcl-2|596@9606	IFN-alpha|3439@9606	0.439143
PMID.dPMID7803269.s7.p0	http://www.ncbi.nlm.nih.gov/pubmed/7803269	http://colonet.informatik.hu-berlin.de/geneview/view/abstract/7803269	All of eight patients who received IFN-alpha (3 megaunits subcutaneously three times a week) demonstrated an increase in bcl-2 expression on circulating malignant cells.	bcl-2|596@9606	IFN-alpha|3439@9606	0.423975
PMID.dPMID17852408.s11.p0	http://www.ncbi.nlm.nih.gov/pubmed/17852408	http://colonet.informatik.hu-berlin.de/geneview/view/abstract/17852408	However, when we over-expressed BCL2 in these cells, they lost processed form of caspase-1 and became resistant to anti-proliferative activity of IFN-alpha.	IFN-alpha|3439@9606	BCL2|596@9606	0.397396
Sentences between STAT4 and IFNA13
PMID.dPMID19109131.s7.p0	http://www.ncbi.nlm.nih.gov/pubmed/19109131	http://colonet.informatik.hu-berlin.de/geneview/view/abstract/19109131	Regression analyses confirmed that the risk allele of STAT4 was associated with increased sensitivity to IFN-alpha signaling.	IFN-alpha|3439@9606	STAT4|6775@9606	0.853738
PMID.dPMID19109131.s9.p0	http://www.ncbi.nlm.nih.gov/pubmed/19109131	http://colonet.informatik.hu-berlin.de/geneview/view/abstract/19109131	These data provide biologic relevance for the risk variant of STAT4 in the IFN-alpha pathway in vivo.	IFN-alpha|3439@9606	STAT4|6775@9606	0.663978
PMID.dPMID10087648.s9.p0	http://www.ncbi.nlm.nih.gov/pubmed/10087648	http://colonet.informatik.hu-berlin.de/geneview/view/abstract/10087648	In the human, this may also occur via IFN-alpha, which is able to activate Stat4.	Stat4|6775@9606	IFN-alpha|3439@9606	0.657952
PMID.dPMID11513540.s4.p0	http://www.ncbi.nlm.nih.gov/pubmed/11513540	http://colonet.informatik.hu-berlin.de/geneview/view/abstract/11513540	STAT-4 is at that point of convergence, unifying the IFNalpha and IL-12 pathways.	IFNalpha|3439@9606	STAT-4|6775@9606	0.614911
PMID.dPMID17015705.s1.p0	http://www.ncbi.nlm.nih.gov/pubmed/17015705	http://colonet.informatik.hu-berlin.de/geneview/view/abstract/17015705	Distinct characteristics of murine STAT4 activation in response to IL-12 and IFN-alpha.	IFN-alpha|3439@9606	STAT4|20849@10090	0.574959
PMID.dPMID19109131.s1.p0	http://www.ncbi.nlm.nih.gov/pubmed/19109131	http://colonet.informatik.hu-berlin.de/geneview/view/abstract/19109131	Cutting edge: autoimmune disease risk variant of STAT4 confers increased sensitivity to IFN-alpha in lupus patients in vivo.	IFN-alpha|3439@9606	STAT4|6775@9606	0.569897
PMID.dPMID11449378.s9.p0	http://www.ncbi.nlm.nih.gov/pubmed/11449378	http://colonet.informatik.hu-berlin.de/geneview/view/abstract/11449378	We show that Stat4 activation is transient in cells stimulated with IFN-alpha, whereas IL-12 induces more long-lasting activation of the transcription factor.	IFN-alpha|3439@9606	Stat4|6775@9606	0.514887
PMID.dPMID9862683.s5.p0	http://www.ncbi.nlm.nih.gov/pubmed/9862683	http://colonet.informatik.hu-berlin.de/geneview/view/abstract/9862683	The molecular basis for this species specificity is that IFN-alpha/beta activate Stat4 in differentiating human, but not mouse, Th cells.	Stat4|6775@9606	IFN-alpha|3439@9606	0.473177
PMID.dPMID14688310.s4.p0	http://www.ncbi.nlm.nih.gov/pubmed/14688310	http://colonet.informatik.hu-berlin.de/geneview/view/abstract/14688310	IL-12 and IFN-alpha both activate STAT4, but with different kinetics.	STAT4|6775@9606	IFN-alpha|3439@9606	0.429748
PMID.dPMID11389027.s12.p1	http://www.ncbi.nlm.nih.gov/pubmed/11389027	http://colonet.informatik.hu-berlin.de/geneview/view/abstract/11389027	IFN-alpha stimulation, which leads to transient phosphorylation of STAT4, does not reduce the level of STAT4 protein.	STAT4|6775@9606	IFN-alpha|3439@9606	0.401099
Sentences between IFNAR1 and IFNA13
PMID.dPMID8910507.s12.p0	http://www.ncbi.nlm.nih.gov/pubmed/8910507	http://colonet.informatik.hu-berlin.de/geneview/view/abstract/8910507	The known signaling molecules that interact with IFNAR1 are positive regulators of IFN-alpha function.	IFN-alpha|3439@9606	IFNAR1|3454@9606	0.770293
PMID.dPMID7623815.s11.p0	http://www.ncbi.nlm.nih.gov/pubmed/7623815	http://colonet.informatik.hu-berlin.de/geneview/view/abstract/7623815	Ligand-induced association of IFNAR and IFN-alpha/beta R probably triggers transmembrane signaling.	IFN-alpha|3439@9606	IFNAR|3454@9606	0.709827
PMID.dPMID15107924.s14.p0	http://www.ncbi.nlm.nih.gov/pubmed/15107924	http://colonet.informatik.hu-berlin.de/geneview/view/abstract/15107924	The present results suggest that IFNAR1-mRNA expression in PBMC is associated with IFN-alpha response to hepatitis C and may be useful for monitoring therapy in patients with chronic hepatitis C.	IFN-alpha|3439@9606	IFNAR1|3454@9606	0.664843
PMID.dPMID17300701.s11.p0	http://www.ncbi.nlm.nih.gov/pubmed/17300701	http://colonet.informatik.hu-berlin.de/geneview/view/abstract/17300701	Conclusion: The results suggest that the expression of IFNAR1 and IFNAR2c independently are important for the antiproliferative effect of IFN-alpha in HCC cells.	IFN-alpha|3439@9606	IFNAR1|3454@9606	0.655872
PMID.dPMID17594944.s14.p0	http://www.ncbi.nlm.nih.gov/pubmed/17594944	http://colonet.informatik.hu-berlin.de/geneview/view/abstract/17594944	Our results suggest that the level of IFN-alpha expressed by PBMCs cells is independent of IFNAR feedback signalling and that the nature of the inducing agent modifies the pattern of IFN-A subtypes preferentially expressed by these cells.	IFNAR|3454@9606	IFN-alpha|3439@9606	0.630712
PMID.dPMID7623815.s9.p1	http://www.ncbi.nlm.nih.gov/pubmed/7623815	http://colonet.informatik.hu-berlin.de/geneview/view/abstract/7623815	We show by cross-linking that both the cloned (51-kDa) and native (102-kDa) IFN-alpha/beta R bind IFN-alpha 2 to form an intermediate product, while IFNAR associates with this product to form a ternary complex.	IFNAR|3454@9606	IFN-alpha|3439@9606	0.578883
PMID.dPMID7623815.s9.p2	http://www.ncbi.nlm.nih.gov/pubmed/7623815	http://colonet.informatik.hu-berlin.de/geneview/view/abstract/7623815	We show by cross-linking that both the cloned (51-kDa) and native (102-kDa) IFN-alpha/beta R bind IFN-alpha 2 to form an intermediate product, while IFNAR associates with this product to form a ternary complex.	IFNAR|3454@9606	IFN-alpha|3439@9606	0.549674
PMID.dPMID7623815.s10.p0	http://www.ncbi.nlm.nih.gov/pubmed/7623815	http://colonet.informatik.hu-berlin.de/geneview/view/abstract/7623815	Hence, IFNAR and IFN-alpha/beta R are components of a common type I IFN receptor, cooperating in ligand binding.	IFN-alpha|3439@9606	IFNAR|3454@9606	0.483678
PMID.dPMID17979888.s11.p1	http://www.ncbi.nlm.nih.gov/pubmed/17979888	http://colonet.informatik.hu-berlin.de/geneview/view/abstract/17979888	Curcumin increased IFN-alpha-induced IL-10 and IFNAR1 expression.	IFNAR1|3454@9606	IFN-alpha|3439@9606	0.424862
PMID.dPMID6182879.s1.p0	http://www.ncbi.nlm.nih.gov/pubmed/6182879	http://colonet.informatik.hu-berlin.de/geneview/view/abstract/6182879	Direct evidence that the gene product of the human chromosome 21 locus, IFRC, is the interferon-alpha receptor.	interferon-alpha|3439@9606	IFRC|3454@9606	0.378722
Sentences between OAS1 and IFNA13
PMC.dPMC17490473.s327.p3	http://www.ncbi.nlm.nih.gov/pubmed/17490473	http://colonet.informatik.hu-berlin.de/geneview/view/abstract/17490473	The molecular pathway that is shared between the arthritis resistant DA.Ncf1E3 rat strain and the arthritis treatment achieved with phytol is the Ifn-╬▓-dependent pathway, which results in the upregulation of Best5, Irf7, Ifit3, Oas1 and Mx2.	Oas1|192281@10116	Ifn|3439@9606	0.532975
PMID.dPMID7606736.s11.p0	http://www.ncbi.nlm.nih.gov/pubmed/7606736	http://colonet.informatik.hu-berlin.de/geneview/view/abstract/7606736	Although RA per se has no effect on the 2-5A synthetase expression, when it is combined with IFN-alpha-2b it appears to be able to potentiate the IFN-induced 2-5A synthetase expression.	IFN-alpha|3439@9606	2-5A synthetase|4938@9606	0.442557
PMID.dPMID2096597.s9.p0	http://www.ncbi.nlm.nih.gov/pubmed/2096597	http://colonet.informatik.hu-berlin.de/geneview/view/abstract/2096597	In vitro, IFN-alpha 2a induced the 2-5A synthetase in lymph node tumor B cells isolated before therapy, and the degree of induction was significantly higher in patients who proved to respond to therapy than in patients who displayed no or minor responses (P less than 0.013).	2-5A synthetase|4938@9606	IFN-alpha|3439@9606	0.418583
PMID.dPMID3942393.s8.p0	http://www.ncbi.nlm.nih.gov/pubmed/3942393	http://colonet.informatik.hu-berlin.de/geneview/view/abstract/3942393	This strongly suggests that one of the antiviral mechanisms might function through the induction of 2',5'-oligo A synthetase activity through the IFN-alpha receptor.	IFN-alpha|3439@9606	2',5'-oligo A synthetase|4938@9606	0.414563
PMID.dPMID14734752.s5.p0	http://www.ncbi.nlm.nih.gov/pubmed/14734752	http://colonet.informatik.hu-berlin.de/geneview/view/abstract/14734752	IFN-alpha priming induced higher levels of mRNA for dsRNA-activated protein kinase, 2'5'-oligoadenylate synthetase, and Toll-like receptor 3, transcripts that encode dsRNA-responsive proteins.	2'5'-oligoadenylate synthetase|4938@9606	IFN-alpha|3439@9606	0.375284
PMID.dPMID2096597.s10.p0	http://www.ncbi.nlm.nih.gov/pubmed/2096597	http://colonet.informatik.hu-berlin.de/geneview/view/abstract/2096597	This indicates that, in nodular NHL, the 2-5A synthetase assay may have some predictive value for responsiveness to IFN-alpha therapy.	IFN-alpha|3439@9606	2-5A synthetase|4938@9606	0.344158
PMID.dPMID7648430.s8.p0	http://www.ncbi.nlm.nih.gov/pubmed/7648430	http://colonet.informatik.hu-berlin.de/geneview/view/abstract/7648430	Although IFN-alpha treatment induced high levels of 2-5A synthetase with or without HSV infection, no activation of the latent endonuclease was detected by specific cleavage of ribosomal RNA.	2-5A synthetase|4938@9606	IFN-alpha|3439@9606	0.319735
PMID.dPMID3942393.s7.p0	http://www.ncbi.nlm.nih.gov/pubmed/3942393	http://colonet.informatik.hu-berlin.de/geneview/view/abstract/3942393	The IFN-alpha was able to induce 2',5'-oligo A synthetase activity in RSa, HeLa S3 and M08 cell lines but not in a HEC-IC cell line lacking receptors for IFN-alpha.	2',5'-oligo A synthetase|4938@9606	IFN-alpha|3439@9606	0.310882
PMID.dPMID9260891.s6.p0	http://www.ncbi.nlm.nih.gov/pubmed/9260891	http://colonet.informatik.hu-berlin.de/geneview/view/abstract/9260891	Cotreatment of cells with TPA and IFN-alpha increases induction of 2-5A synthetase mRNAs above that seen in cells treated with IFN-alpha alone.	2-5A synthetase|4938@9606	IFN-alpha|3439@9606	0.299845
PMID.dPMID6317538.s7.p0	http://www.ncbi.nlm.nih.gov/pubmed/6317538	http://colonet.informatik.hu-berlin.de/geneview/view/abstract/6317538	Thus the amplification in response occurs subsequent to the binding of IFN-alpha to its receptor and the triggering of the first set of intracellular events, the latter exemplified by the induction of 2-5A synthetase.	2-5A synthetase|4938@9606	IFN-alpha|3439@9606	0.285066
Sentences between TP53 and IFNA13
PMID.dPMID15580300.s9.p0	http://www.ncbi.nlm.nih.gov/pubmed/15580300	http://colonet.informatik.hu-berlin.de/geneview/view/abstract/15580300	Altogether these results demonstrate that p53 plays a pivotal role in the IFNalpha-induced apoptotic response.	IFNalpha|3439@9606	p53|7157@9606	0.707573
PMID.dPMID11716533.s7.p1	http://www.ncbi.nlm.nih.gov/pubmed/11716533	http://colonet.informatik.hu-berlin.de/geneview/view/abstract/11716533	These results suggest that the combination of IFN-alpha/TNF-alpha induces apoptotic cell death through a p53- independent pathway.	p53|7157@9606	IFN-alpha|3439@9606	0.627803
PMID.dPMID9111194.s9.p2	http://www.ncbi.nlm.nih.gov/pubmed/9111194	http://colonet.informatik.hu-berlin.de/geneview/view/abstract/9111194	There was no significant interaction between the SspI 2-2 and BstUI 1-1 types indicating that IFN-alpha and p53 genotypes behave as independent risk factors.	p53|7157@9606	IFN-alpha|3439@9606	0.58451
PMID.dPMID15941683.s12.p1	http://www.ncbi.nlm.nih.gov/pubmed/15941683	http://colonet.informatik.hu-berlin.de/geneview/view/abstract/15941683	Our results suggest a role of p53 and its downstream target Bax, in the control of RCC sensitivity to IFN-alpha.	IFN-alpha|3439@9606	p53|7157@9606	0.582644
PMID.dPMID17099286.s1.p0	http://www.ncbi.nlm.nih.gov/pubmed/17099286	http://colonet.informatik.hu-berlin.de/geneview/view/abstract/17099286	Role of p53 in the inhibitory effects of interferon-alpha subtypes on proliferation of hepatocellular carcinoma cells.	interferon-alpha|3439@9606	p53|7157@9606	0.467693
PMID.dPMID17275163.s1.p0	http://www.ncbi.nlm.nih.gov/pubmed/17275163	http://colonet.informatik.hu-berlin.de/geneview/view/abstract/17275163	Synergy of interferon-alpha and 5-fluorouracil in human renal cell carcinoma requires p53 activity.	p53|7157@9606	interferon-alpha|3439@9606	0.460655
PMID.dPMID15941683.s5.p0	http://www.ncbi.nlm.nih.gov/pubmed/15941683	http://colonet.informatik.hu-berlin.de/geneview/view/abstract/15941683	Recently, the role of p53 in the cellular response to IFN-alpha has been proposed in other tumor models (hepatoblastoma).	IFN-alpha|3439@9606	p53|7157@9606	0.438169
PMID.dPMID9053838.s8.p1	http://www.ncbi.nlm.nih.gov/pubmed/9053838	http://colonet.informatik.hu-berlin.de/geneview/view/abstract/9053838	We show that a p53-independent upregulation of p21 mRNA occurs following IFN-alpha treatment in all three cell lines.	IFN-alpha|3439@9606	p53|7157@9606	0.412525
PMID.dPMID17099286.s11.p0	http://www.ncbi.nlm.nih.gov/pubmed/17099286	http://colonet.informatik.hu-berlin.de/geneview/view/abstract/17099286	These results propose that IFN-alpha subtypes induce cells to undergo apoptosis through p53 activation directly and indirectly, in collaboration with 5-FU, further suggesting the presence of distinct signal pathways for IFN-alpha-induced apoptosis.	p53|7157@9606	IFN-alpha|3439@9606	0.35899
PMID.dPMID15941683.s6.p0	http://www.ncbi.nlm.nih.gov/pubmed/15941683	http://colonet.informatik.hu-berlin.de/geneview/view/abstract/15941683	We therefore studied the expression of p53 during IFN-alpha treatment using two freshly established RCC cell lines RCC5 and RCC7.	IFN-alpha|3439@9606	p53|7157@9606	0.324694
Sentences between TYK2 and IFNA13
PMID.dPMID15963247.s7.p1	http://www.ncbi.nlm.nih.gov/pubmed/15963247	http://colonet.informatik.hu-berlin.de/geneview/view/abstract/15963247	It is noteworthy that IFN-zeta/limitin activates the Tyk2-Daxx and Tyk2-Crk pathways weaker than IFN-alpha.	IFN-alpha|3439@9606	Tyk2|7297@9606	0.674188
PMID.dPMID15963247.s7.p2	http://www.ncbi.nlm.nih.gov/pubmed/15963247	http://colonet.informatik.hu-berlin.de/geneview/view/abstract/15963247	It is noteworthy that IFN-zeta/limitin activates the Tyk2-Daxx and Tyk2-Crk pathways weaker than IFN-alpha.	IFN-alpha|3439@9606	Tyk2|7297@9606	0.61977
PMID.dPMID7929242.s7.p0	http://www.ncbi.nlm.nih.gov/pubmed/7929242	http://colonet.informatik.hu-berlin.de/geneview/view/abstract/7929242	Enhanced stimulation of activation of JAK-1, Tyk-2, and p91 by IFN-alpha was progressively reduced from G1/S to G2/M to pass G2/M.	IFN-alpha|3439@9606	Tyk-2|7297@9606	0.539438
PMID.dPMID7518712.s17.p0	http://www.ncbi.nlm.nih.gov/pubmed/7518712	http://colonet.informatik.hu-berlin.de/geneview/view/abstract/7518712	In particular, tyk2 is required for the responses initiated by IFN-alpha while Jak2 has been implicated in the responses to G-CSF, IL-3, EPO, growth hormone, prolactin and IFN-gamma.(ABSTRACT	IFN-alpha|3439@9606	tyk2|7297@9606	0.518085
PMID.dPMID15781341.s11.p5	http://www.ncbi.nlm.nih.gov/pubmed/15781341	http://colonet.informatik.hu-berlin.de/geneview/view/abstract/15781341	In addition, the antisense oligonucleotides against Crk and Daxx, downstream molecules of Tyk2, greatly rescued the IFN-zeta/limitin- and IFN-alpha-induced reduction of megakaryocyte colony numbers.	IFN-alpha|3439@9606	Tyk2|7297@9606	0.486392
PMID.dPMID8780896.s8.p0	http://www.ncbi.nlm.nih.gov/pubmed/8780896	http://colonet.informatik.hu-berlin.de/geneview/view/abstract/8780896	Coprecipitation experiments demonstrated an association of constitutively tyrosine-phosphorylated TYK2 with the IFN-alpha receptor 1 chain.	IFN-alpha|3439@9606	TYK2|7297@9606	0.457293
PMID.dPMID8055912.s6.p0	http://www.ncbi.nlm.nih.gov/pubmed/8055912	http://colonet.informatik.hu-berlin.de/geneview/view/abstract/8055912	Using these, we have identified tyk2 as a 134-kDa protein which is rapidly and transiently phosphorylated on tyrosine in response to IFN-alpha/beta and possesses an inducible kinase activity when tested in vitro.	IFN-alpha|3439@9606	tyk2|7297@9606	0.446476
PMID.dPMID7504784.s8.p2	http://www.ncbi.nlm.nih.gov/pubmed/7504784	http://colonet.informatik.hu-berlin.de/geneview/view/abstract/7504784	Somatic cell genetics experiments have demonstrated a requirement for tyrosine kinase-2 (Tyk2) in the IFN-alpha response pathway and for Jak2 (ref.	IFN-alpha|3439@9606	Tyk2|7297@9606	0.373419
PMID.dPMID7504784.s8.p1	http://www.ncbi.nlm.nih.gov/pubmed/7504784	http://colonet.informatik.hu-berlin.de/geneview/view/abstract/7504784	Somatic cell genetics experiments have demonstrated a requirement for tyrosine kinase-2 (Tyk2) in the IFN-alpha response pathway and for Jak2 (ref.	IFN-alpha|3439@9606	tyrosine kinase-2|7297@9606	0.354081
PMID.dPMID7929242.s6.p0	http://www.ncbi.nlm.nih.gov/pubmed/7929242	http://colonet.informatik.hu-berlin.de/geneview/view/abstract/7929242	In addition, cells from the G1/S phase exhibited increased tyrosine phosphorylation of JAK-1 and Tyk-2 kinases and p91 by IFN-alpha as compared with asynchronized cells.	IFN-alpha|3439@9606	Tyk-2|7297@9606	0.314776
Sentences between EGF and IFNA13
PMID.dPMID15281090.s4.p0	http://www.ncbi.nlm.nih.gov/pubmed/15281090	http://colonet.informatik.hu-berlin.de/geneview/view/abstract/15281090	Since apoptosis occurs together with cytoskeleton reorganization we have evaluated if IFNalpha and EGF could modulate cell remodeling in our experimental conditions.	EGF|1950@9606	IFNalpha|3439@9606	112155
PMID.dPMID8845479.s6.p0	http://www.ncbi.nlm.nih.gov/pubmed/8845479	http://colonet.informatik.hu-berlin.de/geneview/view/abstract/8845479	EGF and IFN-alpha binding to their receptors caused modulation of the other ligand's receptor binding.	IFN-alpha|3439@9606	EGF|1950@9606	104935
PMID.dPMID14684586.s10.p0	http://www.ncbi.nlm.nih.gov/pubmed/14684586	http://colonet.informatik.hu-berlin.de/geneview/view/abstract/14684586	The antiproliferative action of IFN-alpha could not block the signal transduction of the EGF-EGFR pathway.	EGF|1950@9606	IFN-alpha|3439@9606	0.995199
PMID.dPMID12700650.s4.p0	http://www.ncbi.nlm.nih.gov/pubmed/12700650	http://colonet.informatik.hu-berlin.de/geneview/view/abstract/12700650	We have previously demonstrated that IFNalpha induces apoptosis on epidermoid cancer cells and EGF antagonizes this effect.	EGF|1950@9606	IFNalpha|3439@9606	0.746627
PMID.dPMID15281090.s10.p0	http://www.ncbi.nlm.nih.gov/pubmed/15281090	http://colonet.informatik.hu-berlin.de/geneview/view/abstract/15281090	Notably, IFNalpha and EGF did not modify the expression of other molecules associated to cytoskeleton such as focal adhesion kinase and vinculin.	EGF|1950@9606	IFNalpha|3439@9606	0.624971
PMID.dPMID12700650.s12.p0	http://www.ncbi.nlm.nih.gov/pubmed/12700650	http://colonet.informatik.hu-berlin.de/geneview/view/abstract/12700650	Moreover, the selective inhibition of this pathway abrogates the counteracting effect of EGF on the IFNalpha-induced apoptosis.	IFNalpha|3439@9606	EGF|1950@9606	0.545823
PMID.dPMID15281090.s3.p1	http://www.ncbi.nlm.nih.gov/pubmed/15281090	http://colonet.informatik.hu-berlin.de/geneview/view/abstract/15281090	We have previously reported that interferon-alpha (IFNalpha) induces apoptosis and EGF can antagonize this effect in human epidermoid cancer KB cells.	EGF|1950@9606	interferon-alpha|3439@9606	0.522464
PMID.dPMID18230610.s5.p0	http://www.ncbi.nlm.nih.gov/pubmed/18230610	http://colonet.informatik.hu-berlin.de/geneview/view/abstract/18230610	We first connected EGF and IFNalpha-2a via a linker that allows both ligands to bind to their receptors on a cell surface and then incorporated a series of mutations into the IFNalpha-2a portion that progressively decrease both the on rate and the dissociation constant of the IFNalpha-2a-IFNalpha receptor 2 (IFNAR2) interaction.	IFNalpha|3439@9606	EGF|1950@9606	0.516077
PMID.dPMID12700650.s7.p0	http://www.ncbi.nlm.nih.gov/pubmed/12700650	http://colonet.informatik.hu-berlin.de/geneview/view/abstract/12700650	Here we report that the apoptosis induced by IFNalpha occurs together with activation of caspases 3, 6 and 8 and that EGF also antagonizes this effect.	EGF|1950@9606	IFNalpha|3439@9606	0.436878
PMID.dPMID15281090.s3.p2	http://www.ncbi.nlm.nih.gov/pubmed/15281090	http://colonet.informatik.hu-berlin.de/geneview/view/abstract/15281090	We have previously reported that interferon-alpha (IFNalpha) induces apoptosis and EGF can antagonize this effect in human epidermoid cancer KB cells.	EGF|1950@9606	IFNalpha|3439@9606	0.380985
Sentences between MYC and IFNA13
PMID.dPMID12743599.s1.p0	http://www.ncbi.nlm.nih.gov/pubmed/12743599	http://colonet.informatik.hu-berlin.de/geneview/view/abstract/12743599	Long-term high-dose interferon-alpha therapy delays Hepadnavirus-related hepatocarcinogenesis in X/myc transgenic mice.	myc|17869@10090	interferon-alpha|3439@9606	0.744704
PMID.dPMID9016668.s5.p0	http://www.ncbi.nlm.nih.gov/pubmed/9016668	http://colonet.informatik.hu-berlin.de/geneview/view/abstract/9016668	IFN-alpha was the factor used to modulate c-myc mRNA half-life in HeLa 1C5 cells, a stable clone derived from HeLa cells.	c-myc|4609@9606	IFN-alpha|3439@9606	0.680505
PMID.dPMID11716533.s11.p0	http://www.ncbi.nlm.nih.gov/pubmed/11716533	http://colonet.informatik.hu-berlin.de/geneview/view/abstract/11716533	Antisense c-myc inhibited IFN-alpha/TNF-alpha cytotoxicity and apoptotic cell death.	IFN-alpha|3439@9606	c-myc|4609@9606	0.609384
PMID.dPMID3881681.s8.p0	http://www.ncbi.nlm.nih.gov/pubmed/3881681	http://colonet.informatik.hu-berlin.de/geneview/view/abstract/3881681	Thus, IFN-alpha fails to reduce the c-myc mRNA and to change the cell-cycle distribution in HL-60 and U937 cells, although normal induction of other IFN-regulated activities takes place.	c-myc|4609@9606	IFN-alpha|3439@9606	0.602714
PMID.dPMID11394656.s10.p0	http://www.ncbi.nlm.nih.gov/pubmed/11394656	http://colonet.informatik.hu-berlin.de/geneview/view/abstract/11394656	Whether c-myc and hepatocyte proliferation down-regulation could be relevant parameters of IFN-alpha efficiency for hepatocarcinogenesis prevention in cirrhotic patients should be established.	IFN-alpha|3439@9606	c-myc|4609@9606	0.598501
PMID.dPMID16270532.s1.p1	http://www.ncbi.nlm.nih.gov/pubmed/16270532	http://colonet.informatik.hu-berlin.de/geneview/view/abstract/16270532	IFN-alpha enhances TNF-alpha-induced apoptosis through down-regulation of c-Myc protein expression in HL-60 cells.	c-Myc|4609@9606	IFN-alpha|3439@9606	0.588294
PMID.dPMID8423625.s11.p0	http://www.ncbi.nlm.nih.gov/pubmed/8423625	http://colonet.informatik.hu-berlin.de/geneview/view/abstract/8423625	IFN-alpha producers exhibited enhanced HLA antigen expression and suppressed c-myc messenger RNA expression; when cocultured in vitro, they induced similar changes in parental R11 cells.	c-myc|4609@9606	IFN-alpha|3439@9606	0.51703
PMID.dPMID9016668.s8.p0	http://www.ncbi.nlm.nih.gov/pubmed/9016668	http://colonet.informatik.hu-berlin.de/geneview/view/abstract/9016668	However, the c-myc mRNA in IFN-alpha treated cells was less stable than that in the control cells.	IFN-alpha|3439@9606	c-myc|4609@9606	0.501362
PMID.dPMID15548813.s10.p0	http://www.ncbi.nlm.nih.gov/pubmed/15548813	http://colonet.informatik.hu-berlin.de/geneview/view/abstract/15548813	Higher c-myc expression was associated with IFN-alpha resistance as measured by the maximum percentage of inhibition (p = 0.05) and there was a trend with the IFN sensitivity index (p = 0.07).	IFN-alpha|3439@9606	c-myc|4609@9606	0.489213
PMID.dPMID12743599.s5.p0	http://www.ncbi.nlm.nih.gov/pubmed/12743599	http://colonet.informatik.hu-berlin.de/geneview/view/abstract/12743599	We have demonstrated that IFN-alpha can downregulate dose-dependently hepatocyte proliferation and c-myc overexpression at early premalignant stages, while it does not affect either hepatocyte apoptosis or telomerase activity at these steps.	c-myc|4609@9606	IFN-alpha|3439@9606	0.481885
Sentences between VEGFA and IFNA13
PMID.dPMID18771339.s15.p0	http://www.ncbi.nlm.nih.gov/pubmed/18771339	http://colonet.informatik.hu-berlin.de/geneview/view/abstract/18771339	In summary, IFN-alpha inhibits VEGF secretion by melanoma cell lines in vitro and may have similar actions in malignancies that respond to IFN-alpha treatment.	VEGF|7422@9606	IFN-alpha|3439@9606	0.79586
PMID.dPMID18771339.s7.p0	http://www.ncbi.nlm.nih.gov/pubmed/18771339	http://colonet.informatik.hu-berlin.de/geneview/view/abstract/18771339	We hypothesized that IFN-alpha would decrease the release of VEGF by melanoma tumors.	VEGF|7422@9606	IFN-alpha|3439@9606	0.681298
PMID.dPMID18771339.s8.p0	http://www.ncbi.nlm.nih.gov/pubmed/18771339	http://colonet.informatik.hu-berlin.de/geneview/view/abstract/18771339	We studied the effect of IFN-alpha on VEGF production in nine human melanoma cell lines.	VEGF|7422@9606	IFN-alpha|3439@9606	0.648688
PMID.dPMID19129670.s5.p0	http://www.ncbi.nlm.nih.gov/pubmed/19129670	http://colonet.informatik.hu-berlin.de/geneview/view/abstract/19129670	VEGF production was inhibited by IFN-alpha alone in ACHN and SMKT-R2 cells and by sorafenib alone in ACHN, Caki-1, SMKT-R1 and SMKT-R2 cells.	IFN-alpha|3439@9606	VEGF|7422@9606	0.515643
PMID.dPMID16723453.s10.p3	http://www.ncbi.nlm.nih.gov/pubmed/16723453	http://colonet.informatik.hu-berlin.de/geneview/view/abstract/16723453	RA and IFN-alpha dose dependently abrogated IL-6 and IL-8 but had no effect on VEGF expression after UV exposure.	VEGF|7422@9606	IFN-alpha|3439@9606	0.436223
PMID.dPMID18771339.s6.p1	http://www.ncbi.nlm.nih.gov/pubmed/18771339	http://colonet.informatik.hu-berlin.de/geneview/view/abstract/18771339	IFN-alpha may exert its anti-tumor effect in the setting of advanced malignancy by inhibiting the secretion of vascular endothelial growth factor (VEGF), a pro-angiogenic substance.	VEGF|7422@9606	IFN-alpha|3439@9606	0.421751
PMID.dPMID18771339.s6.p0	http://www.ncbi.nlm.nih.gov/pubmed/18771339	http://colonet.informatik.hu-berlin.de/geneview/view/abstract/18771339	IFN-alpha may exert its anti-tumor effect in the setting of advanced malignancy by inhibiting the secretion of vascular endothelial growth factor (VEGF), a pro-angiogenic substance.	vascular endothelial growth factor|7422@9606	IFN-alpha|3439@9606	0.409081
PMID.dPMID18771339.s15.p2	http://www.ncbi.nlm.nih.gov/pubmed/18771339	http://colonet.informatik.hu-berlin.de/geneview/view/abstract/18771339	In summary, IFN-alpha inhibits VEGF secretion by melanoma cell lines in vitro and may have similar actions in malignancies that respond to IFN-alpha treatment.	IFN-alpha|3439@9606	VEGF|7422@9606	0.395444
PMID.dPMID12644537.s8.p2	http://www.ncbi.nlm.nih.gov/pubmed/12644537	http://colonet.informatik.hu-berlin.de/geneview/view/abstract/12644537	Liver metastases from eight patients with NE tumors were analyzed for microvessel density, VEGF mRNA content, and VEGF plasma levels before and after initiation of IFN-alpha therapy.	IFN-alpha|3439@9606	VEGF|7422@9606	0.364225
PMID.dPMID19821965.s13.p0	http://www.ncbi.nlm.nih.gov/pubmed/19821965	http://colonet.informatik.hu-berlin.de/geneview/view/abstract/19821965	Modulation of VEGF and Angs secretion by IFN-alpha and 5-FU may contribute to their anti-angiogenic and anti-tumor effects on HCC.	IFN-alpha|3439@9606	VEGF|7422@9606	0.355657
Sentences between IDO1 and IFNA13
PMID.dPMID2174056.s9.p1	http://www.ncbi.nlm.nih.gov/pubmed/2174056	http://colonet.informatik.hu-berlin.de/geneview/view/abstract/2174056	The results indicate that despite the presence of an ISRE, the control region of the IDO gene can distinguish between IFN-gamma and IFN-alpha.	IFN-alpha|3439@9606	IDO|3620@9606	0.709821
PMID.dPMID11440641.s13.p0	http://www.ncbi.nlm.nih.gov/pubmed/11440641	http://colonet.informatik.hu-berlin.de/geneview/view/abstract/11440641	Our results indicate that IFN-alpha modulates levels of IDO produced by activated CD4(+) T cells.	IDO|3620@9606	IFN-alpha|3439@9606	0.614209
PMID.dPMID19918244.s13.p0	http://www.ncbi.nlm.nih.gov/pubmed/19918244	http://colonet.informatik.hu-berlin.de/geneview/view/abstract/19918244	In conclusion, peripheral administration of IFN-alpha activated IDO in concert with central cytokine responses, resulting in increased brain KYN and QUIN, which correlated with depressive symptoms.	IDO|3620@9606	IFN-alpha|3439@9606	0.540626
PMID.dPMID19853722.s24.p0	http://www.ncbi.nlm.nih.gov/pubmed/19853722	http://colonet.informatik.hu-berlin.de/geneview/view/abstract/19853722	The results are consistent with the physiopathological hypothesis of an induction of IDO underlying depressive and anxiety symptoms related to IFN-alpha therapy in patients with chronic active hepatitis C.	IFN-alpha|3439@9606	IDO|3620@9606	0.455488
PMID.dPMID18055547.s10.p2	http://www.ncbi.nlm.nih.gov/pubmed/18055547	http://colonet.informatik.hu-berlin.de/geneview/view/abstract/18055547	Accordingly, CD11c+ antigen-presenting cells significantly up-regulate IDO gene expression and intracellular IDO protein expression after stimulation with IFN-alpha in vitro.	IFN-alpha|3439@9606	IDO|3620@9606	0.392689
PMID.dPMID19853722.s6.p3	http://www.ncbi.nlm.nih.gov/pubmed/19853722	http://colonet.informatik.hu-berlin.de/geneview/view/abstract/19853722	The latter posits that IFN-alpha is responsible for central serotonin (5-HT) depletion by deviating its precursor, tryptophan (TRP), to a catabolic kynurenine (KYN) pathway through induction of indoleamine 2.3 dioxygenase (IDO).	indoleamine 2.3 dioxygenase|3620@9606	IFN-alpha|3439@9606	0.363381
PMID.dPMID19853722.s6.p6	http://www.ncbi.nlm.nih.gov/pubmed/19853722	http://colonet.informatik.hu-berlin.de/geneview/view/abstract/19853722	The latter posits that IFN-alpha is responsible for central serotonin (5-HT) depletion by deviating its precursor, tryptophan (TRP), to a catabolic kynurenine (KYN) pathway through induction of indoleamine 2.3 dioxygenase (IDO).	IDO|3620@9606	IFN-alpha|3439@9606	0.322286
PMID.dPMID18055547.s10.p1	http://www.ncbi.nlm.nih.gov/pubmed/18055547	http://colonet.informatik.hu-berlin.de/geneview/view/abstract/18055547	Accordingly, CD11c+ antigen-presenting cells significantly up-regulate IDO gene expression and intracellular IDO protein expression after stimulation with IFN-alpha in vitro.	IFN-alpha|3439@9606	IDO|3620@9606	0.308717
PMID.dPMID17227442.s1.p1	http://www.ncbi.nlm.nih.gov/pubmed/17227442	http://colonet.informatik.hu-berlin.de/geneview/view/abstract/17227442	Comparative effects of two type I interferons, human IFN-alpha and ovine IFN-tau on indoleamine-2,3-dioxygenase in primary cultures of human macrophages.	indoleamine-2,3-dioxygenase|3620@9606	IFN-alpha|3439@9606	0.25276
PMID.dPMID11799348.s9.p0	http://www.ncbi.nlm.nih.gov/pubmed/11799348	http://colonet.informatik.hu-berlin.de/geneview/view/abstract/11799348	IFN-alpha-based immunotherapy significantly increased the kynurenine per tryptophan quotient, which estimates the activity of indoleamine 2,3-dioxygenase, the major tryptophan-catabolizing enzyme, which is induced by IFNs.	indoleamine 2,3-dioxygenase|3620@9606	IFN-alpha|3439@9606	0.241566
Sentences between TGFB1 and IFNA13
PMID.dPMID20067543.s1.p0	http://www.ncbi.nlm.nih.gov/pubmed/20067543	http://colonet.informatik.hu-berlin.de/geneview/view/abstract/20067543	Tumour-derived prostaglandin E and transforming growth factor-beta synergize to inhibit plasmacytoid dendritic cell-derived interferon-alpha.	interferon-alpha|3439@9606	transforming growth factor-beta|7040@9606	0.843265
PMID.dPMID7523521.s9.p0	http://www.ncbi.nlm.nih.gov/pubmed/7523521	http://colonet.informatik.hu-berlin.de/geneview/view/abstract/7523521	In contrast, neutralizing Abs to Il-4, IFN-alpha, and TGF-beta failed to improve colony formation.	TGF-beta|7040@9606	IFN-alpha|3439@9606	0.773522
PMID.dPMID16988787.s9.p0	http://www.ncbi.nlm.nih.gov/pubmed/16988787	http://colonet.informatik.hu-berlin.de/geneview/view/abstract/16988787	Our study provides a functional link between IFN-alpha and TGF-beta signaling and extends the function of IFN signaling to calcium-sensitive processes.	TGF-beta|7040@9606	IFN-alpha|3439@9606	0.721248
PMID.dPMID20067543.s7.p0	http://www.ncbi.nlm.nih.gov/pubmed/20067543	http://colonet.informatik.hu-berlin.de/geneview/view/abstract/20067543	Suppression of tumour-derived PGE(2) and TGF-beta restored TLR-induced IFN-alpha production of PDC.	IFN-alpha|3439@9606	TGF-beta|7040@9606	0.513821
PMID.dPMID9815590.s6.p0	http://www.ncbi.nlm.nih.gov/pubmed/9815590	http://colonet.informatik.hu-berlin.de/geneview/view/abstract/9815590	Biological activity of CRA and IFN-alpha was assessed by the measurement of plasma TGF-beta1.	TGF-beta1|7040@9606	IFN-alpha|3439@9606	0.415312
PMID.dPMID7909823.s9.p74	http://www.ncbi.nlm.nih.gov/pubmed/7909823	http://colonet.informatik.hu-berlin.de/geneview/view/abstract/7909823	Addition of exogenous cytokines during the period of activation with anti-CD3 markedly alters the profile of cytokine production by primed cells: 1) IL-2 uniformly enhances Th1 and Th2 cytokine production; 2) IL-4 markedly enhances the release of IL-4, IL-5, and IL-10 and suppresses that of IFN-gamma; 3) IFN-gamma strongly inhibits IL-4 and IL-5 production but slightly enhances IFN-gamma release;…	TGF-beta|7040@9606	IFN-alpha|3439@9606	0.275283
PMID.dPMID16988787.s5.p0	http://www.ncbi.nlm.nih.gov/pubmed/16988787	http://colonet.informatik.hu-berlin.de/geneview/view/abstract/16988787	A DNA microarray-based search for proliferation control genes involved that are cooperatively activated by IFN-alpha and TGF-beta, yielded 28 genes.	TGF-beta|7040@9606	IFN-alpha|3439@9606	0.261256
PMID.dPMID8368581.s7.p1	http://www.ncbi.nlm.nih.gov/pubmed/8368581	http://colonet.informatik.hu-berlin.de/geneview/view/abstract/8368581	IFN-alpha, IFN-gamma TGF-beta and IL-10 are inhibitory, whereas IL-5, IL-6 and TNF-alpha act synergistically with IL-4.	TGF-beta|7040@9606	IFN-alpha|3439@9606	0.223428
PMID.dPMID9140360.s12.p0	http://www.ncbi.nlm.nih.gov/pubmed/9140360	http://colonet.informatik.hu-berlin.de/geneview/view/abstract/9140360	Based on elucidation of the role of cytokines in EAMG and MG, treatments that up-modulate TGF-beta or IFN-alpha and/or suppress cytokines that help B-cell proliferation could be useful to improve the clinical outcome.	IFN-alpha|3439@9606	TGF-beta|7040@9606	0.203716
PMID.dPMID2715197.s8.p1	http://www.ncbi.nlm.nih.gov/pubmed/2715197	http://colonet.informatik.hu-berlin.de/geneview/view/abstract/2715197	These results demonstrate for the first time the cooperative effects between TGF-beta and TNF-alpha and IFN-alpha in the suppression of hematopoietic cell growth, raising the possibility that TGF-beta might be used in concert with TNF-alpha or IFN-alpha in the treatment of various myeloproliferative disorders.	IFN-alpha|3439@9606	TGF-beta|7040@9606	0.165006
Sentences between XRCC1 and IFNA13
PMID.dPMID10412941.s6.p0	http://www.ncbi.nlm.nih.gov/pubmed/10412941	http://colonet.informatik.hu-berlin.de/geneview/view/abstract/10412941	IFN-alpha enhanced the sensitivity of three of five RCC cell lines to 5-FU in a dose- and schedule-dependent manner.	RCC|7515@9606	IFN-alpha|3439@9606	0.692598
PMID.dPMID20640575.s13.p0	http://www.ncbi.nlm.nih.gov/pubmed/20640575	http://colonet.informatik.hu-berlin.de/geneview/view/abstract/20640575	This data provides insight into the molecular mechanism of action of the combined treatment of VPA and IFN-alpha in RCC.	RCC|7515@9606	IFN-alpha|3439@9606	0.635176
PMID.dPMID15082204.s1.p0	http://www.ncbi.nlm.nih.gov/pubmed/15082204	http://colonet.informatik.hu-berlin.de/geneview/view/abstract/15082204	Interleukin-2, interferon-alpha and 5-fluorouracil immunotherapy for metastatic renal cell carcinoma: the all Ireland experience.	renal cell carcinoma|7515@9606	interferon-alpha|3439@9606	0.474003
PMID.dPMID8653314.s1.p0	http://www.ncbi.nlm.nih.gov/pubmed/8653314	http://colonet.informatik.hu-berlin.de/geneview/view/abstract/8653314	Impaired production of interferon-alpha in whole-blood cultures from patients with renal cell carcinoma.	renal cell carcinoma|7515@9606	interferon-alpha|3439@9606	0.448348
PMID.dPMID20640575.s14.p0	http://www.ncbi.nlm.nih.gov/pubmed/20640575	http://colonet.informatik.hu-berlin.de/geneview/view/abstract/20640575	Implications are that the combined application of VPA and IFN-alpha may represent a more efficient alternative to existing therapy options for RCC.	RCC|7515@9606	IFN-alpha|3439@9606	0.38734
PMID.dPMID10412941.s11.p1	http://www.ncbi.nlm.nih.gov/pubmed/10412941	http://colonet.informatik.hu-berlin.de/geneview/view/abstract/10412941	These results suggest that IFN-alpha upregulates TP expression and modulates 5-FU anabolism thus enhancing 5-FU cytotoxicity in a dose- and schedule-dependent manner in some RCC cells.	RCC|7515@9606	IFN-alpha|3439@9606	0.358048
PMID.dPMID8653314.s8.p0	http://www.ncbi.nlm.nih.gov/pubmed/8653314	http://colonet.informatik.hu-berlin.de/geneview/view/abstract/8653314	This study demonstrated that the immune status of patients with high-stage RCC was impaired significantly and exogenous IFN-alpha therapy might be beneficial clinically for this group.	IFN-alpha|3439@9606	RCC|7515@9606	0.293053
PMID.dPMID10412941.s10.p3	http://www.ncbi.nlm.nih.gov/pubmed/10412941	http://colonet.informatik.hu-berlin.de/geneview/view/abstract/10412941	In addition, two of three RCC cell lines with more than a twofold increase in sensitivity to 5-FU induced by IFN-alpha showed a higher TP expression without IFN-alpha stimulation.	IFN-alpha|3439@9606	RCC|7515@9606	0.283359
PMID.dPMID10412941.s10.p0	http://www.ncbi.nlm.nih.gov/pubmed/10412941	http://colonet.informatik.hu-berlin.de/geneview/view/abstract/10412941	In addition, two of three RCC cell lines with more than a twofold increase in sensitivity to 5-FU induced by IFN-alpha showed a higher TP expression without IFN-alpha stimulation.	IFN-alpha|3439@9606	RCC|7515@9606	0.219709
PMC.dPMC19829827.s58.p1	http://www.ncbi.nlm.nih.gov/pubmed/19829827	http://colonet.informatik.hu-berlin.de/geneview/view/abstract/19829827	To our knowledge, this is the first case report of metastatic RCC which showed different responses to two types of 5FU prodrugs in combination with IFN-alpha, suggesting the biochemical modulation of capecitabine by IFN-alpha as a possible mechanism underlying the antitumor effect of the combination of IFN-alpha and capecitabine at the clinical setting.	IFN-alpha|3439@9606	RCC|7515@9606	0.183982
Sentences between CD40LG and IFNA13
PMID.dPMID12699408.s11.p0	http://www.ncbi.nlm.nih.gov/pubmed/12699408	http://colonet.informatik.hu-berlin.de/geneview/view/abstract/12699408	These results indicate that IFN-alpha by itself enhances CD154 expression in CD4+ T cells independently of the induction of IFN-gamma mRNA expression.	CD154|959@9606	IFN-alpha|3439@9606	0.946733
PMID.dPMID3155465.s5.p0	http://www.ncbi.nlm.nih.gov/pubmed/3155465	http://colonet.informatik.hu-berlin.de/geneview/view/abstract/3155465	In the presence of all forms of IFN-alpha tested, IgG and IgM production by PBMC increased twofold to fourfold.	IgM|959@9606	IFN-alpha|3439@9606	0.848887
PMID.dPMID20811042.s1.p0	http://www.ncbi.nlm.nih.gov/pubmed/20811042	http://colonet.informatik.hu-berlin.de/geneview/view/abstract/20811042	Platelet CD154 potentiates interferon-alpha secretion by plasmacytoid dendritic cells in systemic lupus erythematosus.	interferon-alpha|3439@9606	CD154|959@9606	0.837375
PMID.dPMID8174169.s5.p0	http://www.ncbi.nlm.nih.gov/pubmed/8174169	http://colonet.informatik.hu-berlin.de/geneview/view/abstract/8174169	Monocytes overcome the suppressive effects of IFN-alpha on the IgM production induced by SA + IL-2.	IgM|959@9606	IFN-alpha|3439@9606	0.717677
PMID.dPMID9221964.s1.p0	http://www.ncbi.nlm.nih.gov/pubmed/9221964	http://colonet.informatik.hu-berlin.de/geneview/view/abstract/9221964	A randomised clinical trial comparing interferon-alpha and intravenous immunoglobulin in polyneuropathy associated with monoclonal IgM.	IgM|959@9606	interferon-alpha|3439@9606	0.419814
PMID.dPMID12699408.s7.p0	http://www.ncbi.nlm.nih.gov/pubmed/12699408	http://colonet.informatik.hu-berlin.de/geneview/view/abstract/12699408	IFN-alpha suppressed CD154 protein and mRNA expression in CD4+ T cells at the initial phase of activation with immobilized anti-CD3, but enhanced it in the subsequent maturation phase irrespective of the presence of IL-12.	CD154|959@9606	IFN-alpha|3439@9606	0.407146
PMID.dPMID7489967.s7.p0	http://www.ncbi.nlm.nih.gov/pubmed/7489967	http://colonet.informatik.hu-berlin.de/geneview/view/abstract/7489967	After IFN-alpha therapy, IgM anti-HCV-core levels became undetectable with significantly greater frequency in sustained responders (P = .014); a similar trend was observed for HCV RNA (P < .0001).	IgM|959@9606	IFN-alpha|3439@9606	0.405137
PMID.dPMID8174169.s7.p0	http://www.ncbi.nlm.nih.gov/pubmed/8174169	http://colonet.informatik.hu-berlin.de/geneview/view/abstract/8174169	IFN-alpha still enhanced the IgM production induced by SA + IL-2 in the presence of monocytes and indomethacin.	IgM|959@9606	IFN-alpha|3439@9606	0.3666
PMID.dPMID12699408.s10.p0	http://www.ncbi.nlm.nih.gov/pubmed/12699408	http://colonet.informatik.hu-berlin.de/geneview/view/abstract/12699408	Neither IFN-alpha nor IL-12 influenced the stability of CD154 mRNA in anti-CD3-activated CD4+ T cells.	CD154|959@9606	IFN-alpha|3439@9606	0.366543
PMID.dPMID1906385.s6.p0	http://www.ncbi.nlm.nih.gov/pubmed/1906385	http://colonet.informatik.hu-berlin.de/geneview/view/abstract/1906385	IgM anti-IFN-alpha 2a were found more frequently in patients with AVH type A than in normal control subjects (P less than 0.01).	IFN-alpha|3439@9606	IgM|959@9606	0.355601
Sentences between IL1B and IFNA13
PMID.dPMID15342370.s4.p3	http://www.ncbi.nlm.nih.gov/pubmed/15342370	http://colonet.informatik.hu-berlin.de/geneview/view/abstract/15342370	We show that IFN-alpha and polyinosinic:polycytidylic acid (p-I:C) synergize with the classical" type-1-polarizing cytokine cocktail [tumor necrosis factor alpha (TNFalpha)/IL-1beta/IFNgamma], allowing for serum-free generation of fully mature type-1-polarized DCs (DC1). "	IL-1beta|3553@9606	IFN-alpha|3439@9606	0.419831
PMID.dPMID12165091.s11.p1	http://www.ncbi.nlm.nih.gov/pubmed/12165091	http://colonet.informatik.hu-berlin.de/geneview/view/abstract/12165091	On top of its inhibitory effects on IL-1 and TNF-alpha release, IFN-alpha also exerts its anti-inflammatory action in vivo by induction of IL-18BP.	IFN-alpha|3439@9606	IL-1|3553@9606	0.408573
PMID.dPMID17304626.s8.p0	http://www.ncbi.nlm.nih.gov/pubmed/17304626	http://colonet.informatik.hu-berlin.de/geneview/view/abstract/17304626	Additions of the pro-inflammatory cytokines, such as IL-1beta and TNF-alpha, or human rheumatoid synovial fluid, increase murine cDC transdifferentiation into OC, whereas IFN-alpha inhibits it.	IFN-alpha|3439@9606	IL-1beta|16176@10090	0.371281
PMID.dPMID18494930.s8.p1	http://www.ncbi.nlm.nih.gov/pubmed/18494930	http://colonet.informatik.hu-berlin.de/geneview/view/abstract/18494930	In addition, IFN-alpha or IFN-beta significantly enhanced the stimulatory effect of IL-1beta on production of IL-1Ra.	IL-1beta|3553@9606	IFN-alpha|3439@9606	0.311646
PMC.dPMC16171525.s121.p2	http://www.ncbi.nlm.nih.gov/pubmed/16171525	http://colonet.informatik.hu-berlin.de/geneview/view/abstract/16171525	An in vitro study on the effects of IFN-alpha on human bone marrow stromal cells showed that IFN-alpha decreased the production of IL-1b [], which has been shown to stimulate osteoclastic bone resorption [].	IL-1b|3553@9606	IFN-alpha|3439@9606	0.278276
PMID.dPMID12051728.s1.p1	http://www.ncbi.nlm.nih.gov/pubmed/12051728	http://colonet.informatik.hu-berlin.de/geneview/view/abstract/12051728	Involvement of IL-1beta and IL-10 in IFN-alpha-mediated antiviral gene induction in human hepatoma cells.	IFN-alpha|3439@9606	IL-1beta|3553@9606	0.239954
PMID.dPMID11836673.s7.p42	http://www.ncbi.nlm.nih.gov/pubmed/11836673	http://colonet.informatik.hu-berlin.de/geneview/view/abstract/11836673	Systems studied have included lysis by interleukin-2 (IL-2)-activated lymphokine-activated killer (LAK) cells, tumor necrosis factor-alpha (TNF-alpha), a p16-expressing adenovirus vector, suicide gene therapy using the herpes simplex virus-tyrosine kinase (HSV-tk) followed by ganciclovir, and immunomodulatory gene therapy with IL-2, IL-4, interferon-gamma (IFN-gamma), IFN-alpha, TNF-alpha, granul…	IL-1beta|3553@9606	IFN-alpha|3439@9606	0.227033
PMID.dPMID12051728.s9.p6	http://www.ncbi.nlm.nih.gov/pubmed/12051728	http://colonet.informatik.hu-berlin.de/geneview/view/abstract/12051728	IL-1beta and IL-10 interact with IFN-alpha to up- and down-regulate antiviral gene expression, respectively, by modulating STAT1 activation induced by IFN-alpha.	IFN-alpha|3439@9606	IL-1beta|3553@9606	0.173934
PMID.dPMID9402107.s13.p1	http://www.ncbi.nlm.nih.gov/pubmed/9402107	http://colonet.informatik.hu-berlin.de/geneview/view/abstract/9402107	IFN-alpha, IFN-gamma, IL1-beta, IL12, and TNF-alpha had limited effects on m-RCA expression on uveal melanoma cells in vitro.	IL1-beta|3553@9606	IFN-alpha|3439@9606	0.167189
PMID.dPMID12687259.s4.p1	http://www.ncbi.nlm.nih.gov/pubmed/12687259	http://colonet.informatik.hu-berlin.de/geneview/view/abstract/12687259	Cytokine mRNA level in the cell cultures was measured by the RT-PCR method using 11 primer pairs for the following cytokines: IFN-alpha, IFN-gamma, IL-1beta, IL-2, IL-4, IL-6, IL-8, IL-10, IL-12, IL-18 and TNF-alpha.	IL-1beta|3553@9606	IFN-alpha|3439@9606	0.160991
Sentences between IGHE and IFNA13
PMID.dPMID2521231.s10.p0	http://www.ncbi.nlm.nih.gov/pubmed/2521231	http://colonet.informatik.hu-berlin.de/geneview/view/abstract/2521231	IFN-alpha inhibits IgE-BF production by IFN-gamma-stimulated PBMC and by IL-4-stimulated cells suggesting that it exerts its effect on B cells and on monocytes.	IgE|3497@9606	IFN-alpha|3439@9606	1031
PMID.dPMID1693082.s21.p1	http://www.ncbi.nlm.nih.gov/pubmed/1693082	http://colonet.informatik.hu-berlin.de/geneview/view/abstract/1693082	IFN-alpha appears to resemble IFN-gamma in its ability to inhibit IgE and enhance IgG2a responses in GaM delta-injected mice, but it requires the presence of IFN-gamma to suppress IgG1 production in these mice.	IgE|3497@9606	IFN-alpha|3439@9606	100995
PMID.dPMID2521231.s13.p20	http://www.ncbi.nlm.nih.gov/pubmed/2521231	http://colonet.informatik.hu-berlin.de/geneview/view/abstract/2521231	Taken collectively the results indicate that: 1) IL-4 induces IgE-BF production by both B cells and monocytes, 2) IFN-gamma stimulates IgE-BF synthesis by monocytes but suppresses its production by IL-4-stimulated B cells, and finally 3) IFN-alpha inhibits IgE-BF synthesis in response to either IFN-gamma or IL-4.	IgE|3497@9606	IFN-alpha|3439@9606	0.839516
PMID.dPMID8829490.s17.p0	http://www.ncbi.nlm.nih.gov/pubmed/8829490	http://colonet.informatik.hu-berlin.de/geneview/view/abstract/8829490	The results argue for a benefical effect of IFN-alpha 2b in suppressing IgE production and symptoms of pruritus in an early-stage B-CLL.	IgE|3497@9606	IFN-alpha|3439@9606	0.788794
PMID.dPMID1825101.s11.p3	http://www.ncbi.nlm.nih.gov/pubmed/1825101	http://colonet.informatik.hu-berlin.de/geneview/view/abstract/1825101	Collectively, our data indicate that spontaneous IgE synthesis in vitro can be modulated by IL-4, IL-5, IFN-gamma, and IFN-alpha.	IFN-alpha|3439@9606	IgE|3497@9606	0.632148
PMID.dPMID2521231.s13.p11	http://www.ncbi.nlm.nih.gov/pubmed/2521231	http://colonet.informatik.hu-berlin.de/geneview/view/abstract/2521231	Taken collectively the results indicate that: 1) IL-4 induces IgE-BF production by both B cells and monocytes, 2) IFN-gamma stimulates IgE-BF synthesis by monocytes but suppresses its production by IL-4-stimulated B cells, and finally 3) IFN-alpha inhibits IgE-BF synthesis in response to either IFN-gamma or IL-4.	IFN-alpha|3439@9606	IgE|3497@9606	0.550875
PMID.dPMID2521231.s13.p13	http://www.ncbi.nlm.nih.gov/pubmed/2521231	http://colonet.informatik.hu-berlin.de/geneview/view/abstract/2521231	Taken collectively the results indicate that: 1) IL-4 induces IgE-BF production by both B cells and monocytes, 2) IFN-gamma stimulates IgE-BF synthesis by monocytes but suppresses its production by IL-4-stimulated B cells, and finally 3) IFN-alpha inhibits IgE-BF synthesis in response to either IFN-gamma or IL-4.	IFN-alpha|3439@9606	IgE|3497@9606	0.543297
PMID.dPMID2533178.s5.p16	http://www.ncbi.nlm.nih.gov/pubmed/2533178	http://colonet.informatik.hu-berlin.de/geneview/view/abstract/2533178	The IL-4-mediated IgE synthesis is enhanced by IL-2, IL-5 and IL-6 and suppressed by IFN-gamma, IFN-alpha and PGE2.	IFN-alpha|3439@9606	IgE|3497@9606	0.470008
PMID.dPMID2496134.s14.p11	http://www.ncbi.nlm.nih.gov/pubmed/2496134	http://colonet.informatik.hu-berlin.de/geneview/view/abstract/2496134	Our findings demonstrate that IL-4-induced IgE production involves complex interactions of T cells, B cells, and monocytes and is positively modulated by IL-5 and s-CD23 but down-regulated by IFN-gamma, IFN-alpha, and PGE-2, respectively.	IFN-alpha|3439@9606	IgE|3497@9606	0.389296
PMID.dPMID8829490.s1.p0	http://www.ncbi.nlm.nih.gov/pubmed/8829490	http://colonet.informatik.hu-berlin.de/geneview/view/abstract/8829490	B-cell chronic lymphocytic leukemia associated with high serum IGE levels and pruriginous skin lesions: successful therapy with IFN-alpha 2b after failure on IFN-gamma.	IFN-alpha|3439@9606	IGE|3497@9606	0.304196
Sentences between TLR3 and IFNA13
PMID.dPMID15778392.s12.p0	http://www.ncbi.nlm.nih.gov/pubmed/15778392	http://colonet.informatik.hu-berlin.de/geneview/view/abstract/15778392	In conclusion, our results suggest that IFN-alpha-induced up-regulation of TLR3 expression is involved in dsRNA activated antiviral response in human epithelial and endothelial cells.	TLR3|7098@9606	IFN-alpha|3439@9606	0.993215
PMID.dPMID16087162.s8.p0	http://www.ncbi.nlm.nih.gov/pubmed/16087162	http://colonet.informatik.hu-berlin.de/geneview/view/abstract/16087162	IFN-alpha priming enhanced TLR3 expression and MIP-1alpha production in poly(I:C)-treated keratinocytes.	TLR3|7098@9606	IFN-alpha|3439@9606	0.693484
PMID.dPMID15856047.s5.p0	http://www.ncbi.nlm.nih.gov/pubmed/15856047	http://colonet.informatik.hu-berlin.de/geneview/view/abstract/15856047	Expression of IFN-alpha, -beta and TLR-3 proteins was also studied by immunohistochemistry.	TLR-3|7098@9606	IFN-alpha|3439@9606	0.521875
PMID.dPMID15778392.s1.p0	http://www.ncbi.nlm.nih.gov/pubmed/15778392	http://colonet.informatik.hu-berlin.de/geneview/view/abstract/15778392	IFN-alpha enhances TLR3-mediated antiviral cytokine expression in human endothelial and epithelial cells by up-regulating TLR3 expression.	TLR3|7098@9606	IFN-alpha|3439@9606	0.455694
PMC.dPMC22570612.s150.p0	http://www.ncbi.nlm.nih.gov/pubmed/22570612	http://colonet.informatik.hu-berlin.de/geneview/view/abstract/22570612	Interestingly, although we show that Tlr3/Trif-dependent epithelial cell signaling significantly contributes to the recruitment of effector T lymphocytes to the proximal intestine, Trif-deficient mice similar to mice lacking the Ifn-╬╗ receptor IL-28R successfully cleared the virus during the second week after infection .	Ifn|3439@9606	Tlr3|142980@10090	0.414267
PMID.dPMID16782388.s6.p6	http://www.ncbi.nlm.nih.gov/pubmed/16782388	http://colonet.informatik.hu-berlin.de/geneview/view/abstract/16782388	We also demonstrate that IFN-alpha and IFN-beta upregulate mda-5, RIG-I, and TLR3 gene expression in epithelial and endothelial cell lines.	TLR3|7098@9606	IFN-alpha|3439@9606	0.328917
PMID.dPMID15699120.s7.p0	http://www.ncbi.nlm.nih.gov/pubmed/15699120	http://colonet.informatik.hu-berlin.de/geneview/view/abstract/15699120	IFN-alpha pretreatment of macrophages was required for efficient TLR3 and TLR4 agonist-induced activation of IFN-alpha, IFN-beta, IL-28, and IL-29 genes.	TLR3|7098@9606	IFN-alpha|3439@9606	0.259189
PMID.dPMID16087162.s9.p0	http://www.ncbi.nlm.nih.gov/pubmed/16087162	http://colonet.informatik.hu-berlin.de/geneview/view/abstract/16087162	This suggests that IFN-alpha enhanced the TLR3 expression and reinforced the response of keratinocytes to poly(I:C), which resulted in an increase in MIP-1alpha production.	TLR3|7098@9606	IFN-alpha|3439@9606	0.252655
PMID.dPMID14530357.s6.p3	http://www.ncbi.nlm.nih.gov/pubmed/14530357	http://colonet.informatik.hu-berlin.de/geneview/view/abstract/14530357	In contrast, MDCs, which express TLR3, TLR4, and TLR7, responded to poly(I:C), LPS, and imidazoquinolines with phenotypic maturation and high production of IL-12 p70 without producing detectable IFN-alpha.	IFN-alpha|3439@9606	TLR3|7098@9606	0.176173
PMID.dPMID18428149.s9.p2	http://www.ncbi.nlm.nih.gov/pubmed/18428149	http://colonet.informatik.hu-berlin.de/geneview/view/abstract/18428149	In search for factors regulating TLR/RIG-I expression, it was shown that IFN-alpha, polyinosine-polycytidylic acid and lipopolysaccharide induced TLR3, TLR4 and RIG-I, but TNF-alpha, HCV core or HCV non-structural proteins did not.	TLR3|7098@9606	IFN-alpha|3439@9606	0.172148
Sentences between IL18 and IFNA13
PMID.dPMID10925275.s5.p0	http://www.ncbi.nlm.nih.gov/pubmed/10925275	http://colonet.informatik.hu-berlin.de/geneview/view/abstract/10925275	IL-18 exerts its effects in synergy with IFN-alpha or IL-12 to induce IFN-gamma.	IFN-alpha|3439@9606	IL-18|3606@9606	0.980453
PMID.dPMID9637519.s10.p0	http://www.ncbi.nlm.nih.gov/pubmed/9637519	http://colonet.informatik.hu-berlin.de/geneview/view/abstract/9637519	IL-18 synergized with IFN-alpha to up-regulate IFN-gamma gene expression and protein production.	IFN-alpha|3439@9606	IL-18|3606@9606	0.887644
PMID.dPMID12918059.s7.p0	http://www.ncbi.nlm.nih.gov/pubmed/12918059	http://colonet.informatik.hu-berlin.de/geneview/view/abstract/12918059	Interestingly, IFN-alpha also induced IL-18 secretion of the poorly differentiated cell line PC-3.	IL-18|3606@9606	IFN-alpha|3439@9606	0.844988
PMID.dPMID10925275.s1.p0	http://www.ncbi.nlm.nih.gov/pubmed/10925275	http://colonet.informatik.hu-berlin.de/geneview/view/abstract/10925275	IFN-alpha and IL-12 induce IL-18 receptor gene expression in human NK and T cells.	IL-18|3606@9606	IFN-alpha|3439@9606	0.837419
PMID.dPMID19238512.s1.p0	http://www.ncbi.nlm.nih.gov/pubmed/19238512	http://colonet.informatik.hu-berlin.de/geneview/view/abstract/19238512	Proapoptotic IL-18 in patients with chronic hepatitis C treated with pegylated interferon-alpha.	interferon-alpha|3439@9606	IL-18|3606@9606	0.710657
PMID.dPMID11449378.s11.p0	http://www.ncbi.nlm.nih.gov/pubmed/11449378	http://colonet.informatik.hu-berlin.de/geneview/view/abstract/11449378	Our results demonstrate that IFN-alpha and IL-18 are important innate cytokines in inducing NK cell IFN-gamma production.	IL-18|3606@9606	IFN-alpha|3439@9606	0.691324
PMID.dPMID11449378.s5.p0	http://www.ncbi.nlm.nih.gov/pubmed/11449378	http://colonet.informatik.hu-berlin.de/geneview/view/abstract/11449378	During microbial infections macrophage-derived IFN-alpha, IL-12, and IL-18 enhance IFN-gamma production and Th1 response.	IL-18|3606@9606	IFN-alpha|3439@9606	0.512001
PMID.dPMID9637519.s11.p0	http://www.ncbi.nlm.nih.gov/pubmed/9637519	http://colonet.informatik.hu-berlin.de/geneview/view/abstract/9637519	The data suggest that IFN-alpha/beta and IL-18 produced by macrophages during virus infection may act together to induce IFN-gamma synthesis and, consequently, may play an important role for both of these cytokines in the development of Th1-type immune responses.	IL-18|3606@9606	IFN-alpha|3439@9606	0.489011
PMID.dPMID11449378.s6.p0	http://www.ncbi.nlm.nih.gov/pubmed/11449378	http://colonet.informatik.hu-berlin.de/geneview/view/abstract/11449378	Here we show that IFN-alpha in combination with IL-18 very efficiently induces IFN-gamma expression also in primary, nonactivated NK cells and in NK-92 cell line.	IL-18|3606@9606	IFN-alpha|3439@9606	0.472838
PMID.dPMID12218122.s6.p0	http://www.ncbi.nlm.nih.gov/pubmed/12218122	http://colonet.informatik.hu-berlin.de/geneview/view/abstract/12218122	The monokine combination IL-12, IL-18, and IFN-alpha substitutes for TCR-mediated stimulation to induce the same differentiation process in both immature CD2(-/low) and primary mature CD2(+) IL-13(+) T cells.	IFN-alpha|3439@9606	IL-18|3606@9606	0.382522
Sentences between FCER2 and IFNA13
PMID.dPMID7948749.s12.p0	http://www.ncbi.nlm.nih.gov/pubmed/7948749	http://colonet.informatik.hu-berlin.de/geneview/view/abstract/7948749	In contrast, IFN-alpha was a potent inhibitor of monocyte CD23 expression induced by these three cytokines.(ABSTRACT	CD23|2208@9606	IFN-alpha|3439@9606	0.548117
PMID.dPMID8453305.s7.p3	http://www.ncbi.nlm.nih.gov/pubmed/8453305	http://colonet.informatik.hu-berlin.de/geneview/view/abstract/8453305	IFN-alpha also suppresses these IL-4-mediated activities and, in addition, suppresses IFN-gamma-mediated stimulation of CD23 production.	CD23|2208@9606	IFN-alpha|3439@9606	0.442625
PMID.dPMID8453305.s4.p20	http://www.ncbi.nlm.nih.gov/pubmed/8453305	http://colonet.informatik.hu-berlin.de/geneview/view/abstract/8453305	Interleukin-4 (IL-4), interferon-gamma (IFN-gamma), and interferon-alpha (IFN-alpha) are involved in coordinate regulation of CD23.	CD23|2208@9606	IFN-alpha|3439@9606	0.36506
PMID.dPMID2529929.s4.p0	http://www.ncbi.nlm.nih.gov/pubmed/2529929	http://colonet.informatik.hu-berlin.de/geneview/view/abstract/2529929	The suggestion that the CD23 molecule (Fc epsilon II receptor) might be involved in the signalling pathway of LMW-BCGF prompted us to study the expression of this molecule on hairy cells and its modulation by IFN-alpha.	IFN-alpha|3439@9606	CD23|2208@9606	0.303628
PMID.dPMID8707347.s8.p2	http://www.ncbi.nlm.nih.gov/pubmed/8707347	http://colonet.informatik.hu-berlin.de/geneview/view/abstract/8707347	We report here that amongst the other ligands for CD21 (EBV, C3d,g and IFN-alpha), only EBV is able to inhibit the binding of CD23 to CD21.	CD23|2208@9606	IFN-alpha|3439@9606	0.25073
PMID.dPMID8453305.s4.p19	http://www.ncbi.nlm.nih.gov/pubmed/8453305	http://colonet.informatik.hu-berlin.de/geneview/view/abstract/8453305	Interleukin-4 (IL-4), interferon-gamma (IFN-gamma), and interferon-alpha (IFN-alpha) are involved in coordinate regulation of CD23.	CD23|2208@9606	interferon-alpha|3439@9606	0.214975
PMID.dPMID2529929.s6.p0	http://www.ncbi.nlm.nih.gov/pubmed/2529929	http://colonet.informatik.hu-berlin.de/geneview/view/abstract/2529929	In vitro incubation of hairy cells with IFN-alpha, which elicits a suppression of the proliferative response of these cells to LMW-BCGF, induced a parallel significant reduction of CD23 expression in only three cases.	CD23|2208@9606	IFN-alpha|3439@9606	0.208682
PMID.dPMID2523019.s4.p0	http://www.ncbi.nlm.nih.gov/pubmed/2523019	http://colonet.informatik.hu-berlin.de/geneview/view/abstract/2523019	Alpha interferon (IFN-alpha) and its intracellular mediator, (2'-5')oligoadenylate (2, 5-A), induced Fc epsilon R2/CD23 expression on U937 with no significant increase of the Fc epsilon R2/CD23 mRNA.	CD23|2208@9606	IFN-alpha|3439@9606	0.205035
PMID.dPMID7948749.s3.p3	http://www.ncbi.nlm.nih.gov/pubmed/7948749	http://colonet.informatik.hu-berlin.de/geneview/view/abstract/7948749	CD23 expression by B cells and monocytes can be regulated by cytokines including IL-4, IFN-gamma and IFN-alpha.	IFN-alpha|3439@9606	CD23|2208@9606	0.197595
PMID.dPMID2523019.s7.p9	http://www.ncbi.nlm.nih.gov/pubmed/2523019	http://colonet.informatik.hu-berlin.de/geneview/view/abstract/2523019	The results suggest that the mechanisms of enhancement of Fc epsilon R2/CD23 expression on U937 cells by IFN-alpha and IFN-gamma are different and that 2, 5-A may play an important role in the Fc epsilon R2/CD23 expression on U937 cells induced by IFN-alpha.	IFN-alpha|3439@9606	CD23|2208@9606	0.18793
Sentences between IL5 and IFNA13
PMID.dPMID9020930.s10.p1	http://www.ncbi.nlm.nih.gov/pubmed/9020930	http://colonet.informatik.hu-berlin.de/geneview/view/abstract/9020930	Our results indicate that IFN-alpha potently suppresses the abnormal IL-4 and IL-5 production, that IL-12 can correct the deficient IFN-gamma production and cell-mediated cytotoxicity, and that retinoids can enhance IFN-gamma and IL-12 production.	IL-5|3567@9606	IFN-alpha|3439@9606	0.829277
PMID.dPMID11148473.s10.p1	http://www.ncbi.nlm.nih.gov/pubmed/11148473	http://colonet.informatik.hu-berlin.de/geneview/view/abstract/11148473	These results suggest that IFN-alpha and perhaps IL-12 may produce a therapeutic response in patients with CTCL and eosinophilia through direct suppression of IL-5 production by malignant S├®zary cells.	IL-5|3567@9606	IFN-alpha|3439@9606	0.446737
PMID.dPMID7613117.s6.p0	http://www.ncbi.nlm.nih.gov/pubmed/7613117	http://colonet.informatik.hu-berlin.de/geneview/view/abstract/7613117	IFN-alpha efficiently used for the treatment of hypereosinophilic syndromes can significantly decrease eosinophil degranulation and IL-5 release by eosinophils, through binding to a receptor for IFN-alpha.	IL-5|3567@9606	IFN-alpha|3439@9606	0.437327
PMID.dPMID8567949.s4.p0	http://www.ncbi.nlm.nih.gov/pubmed/8567949	http://colonet.informatik.hu-berlin.de/geneview/view/abstract/8567949	We found that IFN-alpha profoundly inhibited in a dose-dependent manner IL-5 production by resting CD4+ T cells whereas IL-10 was upregulated in both systems.	IL-5|16191@10090	IFN-alpha|3439@9606	0.419049
PMID.dPMID10476943.s1.p0	http://www.ncbi.nlm.nih.gov/pubmed/10476943	http://colonet.informatik.hu-berlin.de/geneview/view/abstract/10476943	Oral administration of interferon-alpha induces a transient decline in oral mucosal immunoglobulins and an increase in interleukin-5.	interleukin-5|3567@9606	interferon-alpha|3439@9606	0.410326
PMID.dPMID15990796.s13.p0	http://www.ncbi.nlm.nih.gov/pubmed/15990796	http://colonet.informatik.hu-berlin.de/geneview/view/abstract/15990796	Moreover, the data also suggest that IFN-alpha might suppress the expression of IL-5 and IL-13 in differentiated TH2 cells.	IL-5|3567@9606	IFN-alpha|3439@9606	0.394107
PMID.dPMID2533178.s5.p18	http://www.ncbi.nlm.nih.gov/pubmed/2533178	http://colonet.informatik.hu-berlin.de/geneview/view/abstract/2533178	The IL-4-mediated IgE synthesis is enhanced by IL-2, IL-5 and IL-6 and suppressed by IFN-gamma, IFN-alpha and PGE2.	IFN-alpha|3439@9606	IL-5|3567@9606	0.256288
PMID.dPMID8589265.s5.p12	http://www.ncbi.nlm.nih.gov/pubmed/8589265	http://colonet.informatik.hu-berlin.de/geneview/view/abstract/8589265	Cytokine gene expression was investigated by intronspanning RT-PCR for IL-1 alpha, IL-1 beta, IL-2, IL-4, IL-5, IL-6, IL-10, IFN-alpha, IFN-beta, IFN-gamma, and TNF-alpha.	IFN-alpha|3439@9606	IL-5|3567@9606	0.172309
PMID.dPMID16126951.s8.p0	http://www.ncbi.nlm.nih.gov/pubmed/16126951	http://colonet.informatik.hu-berlin.de/geneview/view/abstract/16126951	As recombinant IFN-alpha downregulates IL-5 production of CD4(+) T cells in vitro, the increased secretion of IL-5 in patients with CSS may provide the clue for the therapeutic efficacy of recombinant IFN-alpha in the disease.	IL-5|3567@9606	IFN-alpha|3439@9606	0.128215
PMID.dPMID11148473.s7.p2	http://www.ncbi.nlm.nih.gov/pubmed/11148473	http://colonet.informatik.hu-berlin.de/geneview/view/abstract/11148473	Suppression of IL-5 production by IFN-alpha and IL-12 was assessed by comparing IL-5 production by PBMCs from patients with S├®zary syndrome and eosinophilia when cultured alone or in the presence of either IFN-alpha or IL-12.	IL-5|3567@9606	IFN-alpha|3439@9606	0.124882
Sentences between CD40 and IFNA13
PMID.dPMID12946990.s8.p0	http://www.ncbi.nlm.nih.gov/pubmed/12946990	http://colonet.informatik.hu-berlin.de/geneview/view/abstract/12946990	IL-12-producing PDCs require costimulation through CD40 and appear more mature than IFN-alpha-producing PDCs.	IFN-alpha|3439@9606	CD40|958@9606	0.70615
PMID.dPMID10334384.s5.p0	http://www.ncbi.nlm.nih.gov/pubmed/10334384	http://colonet.informatik.hu-berlin.de/geneview/view/abstract/10334384	In cell samples from 16 B-CLL patients, the addition of IFN-alpha to CD40-stimulated purified B-CLL cells caused a significant increase in [3H]thymidine uptake (p < 0.003).	CD40|958@9606	IFN-alpha|3439@9606	0.55809
PMC.dPMC22470494.s208.p0	http://www.ncbi.nlm.nih.gov/pubmed/22470494	http://colonet.informatik.hu-berlin.de/geneview/view/abstract/22470494	How does this reconcile with our data of reduced IFN-alpha production upon enhanced CD40:CD40L interactions?	CD40|958@9606	IFN-alpha|3439@9606	0.528661
PMID.dPMID10334384.s1.p0	http://www.ncbi.nlm.nih.gov/pubmed/10334384	http://colonet.informatik.hu-berlin.de/geneview/view/abstract/10334384	IFN-alpha stimulates proliferation and cytokine secretion of CD40-stimulated B cell chronic lymphocytic leukemia cells in vitro.	CD40|958@9606	IFN-alpha|3439@9606	0.455795
PMID.dPMID12480254.s9.p0	http://www.ncbi.nlm.nih.gov/pubmed/12480254	http://colonet.informatik.hu-berlin.de/geneview/view/abstract/12480254	The ratio of IFN-alpha versus IL-12 and the quantity of these cytokines are regulated by T helper cell-mediated costimulation via CD40 ligation.	CD40|958@9606	IFN-alpha|3439@9606	0.436389
PMID.dPMID10334384.s7.p1	http://www.ncbi.nlm.nih.gov/pubmed/10334384	http://colonet.informatik.hu-berlin.de/geneview/view/abstract/10334384	In contrast, proliferation of normal tonsillar B cells stimulated by the combination CD40/IL-2/IL-10 was significantly inhibited by IFN-alpha.	IFN-alpha|3439@9606	CD40|958@9606	0.401767
PMID.dPMID11592079.s9.p1	http://www.ncbi.nlm.nih.gov/pubmed/11592079	http://colonet.informatik.hu-berlin.de/geneview/view/abstract/11592079	CD40 ligand (CD40L) and CpG ODN synergized to activate PDC and to stimulate the production of IFN-alpha and IL-12 including bioactive IL-12 p70.	IFN-alpha|3439@9606	CD40|21939@10090	0.268954
PMID.dPMID16499575.s7.p1	http://www.ncbi.nlm.nih.gov/pubmed/16499575	http://colonet.informatik.hu-berlin.de/geneview/view/abstract/16499575	We found that 24-h IFN-alpha co-culture of day 7 monocyte-derived DC generated with GM-CSF and IL-4 induces increased numbers of DC positive for CD54 and CD40 together with the co-stimulatory molecule CD80 but not the activation marker CD83.	CD40|958@9606	IFN-alpha|3439@9606	0.223017
PMC.dPMC22470494.s166.p0	http://www.ncbi.nlm.nih.gov/pubmed/22470494	http://colonet.informatik.hu-berlin.de/geneview/view/abstract/22470494	The functional PDC deficit correlates with the expression of CD40 on the PDC in HIV-1 infected subjects with reduced CD4+ T cell counts Did sCD40L also affect the CpG-induced IFN-alpha production in HIV-1 infected donors?	IFN-alpha|3439@9606	CD40|958@9606	0.217163
PMC.dPMC22470494.s24.p1	http://www.ncbi.nlm.nih.gov/pubmed/22470494	http://colonet.informatik.hu-berlin.de/geneview/view/abstract/22470494	In this respect, we focused on the costimulatory molecule CD40 and its ligand, CD40L (CD154), because we and others have shown that CD40L reduced the IFN-alpha production at high concentrations , .	IFN-alpha|3439@9606	CD40|958@9606	0.173808
Sentences between IFNA13 and IFNA2
PMID.dPMID10939636.s3.p0	http://www.ncbi.nlm.nih.gov/pubmed/10939636	http://colonet.informatik.hu-berlin.de/geneview/view/abstract/10939636	We have previously reported that interferon-alpha-2b (IFN-alpha-2b) can be encapsulated in liposomes without compromising its anti-fibrogenic effects on dermal fibroblasts in vitro.	IFN-alpha|3439@9606	interferon-alpha-2b|3440@9606	0.829169
PMID.dPMID15004750.s9.p0	http://www.ncbi.nlm.nih.gov/pubmed/15004750	http://colonet.informatik.hu-berlin.de/geneview/view/abstract/15004750	In healthy subjects, IFNA allele 2, which is over-represented in patients with sarcoidosis, was significantly associated with increased IFN-alpha and IL-12p70 production induced by Sendai virus in vitro.	IFN-alpha|3439@9606	IFNA|3440@9606	0.674829
PMID.dPMID15004750.s10.p0	http://www.ncbi.nlm.nih.gov/pubmed/15004750	http://colonet.informatik.hu-berlin.de/geneview/view/abstract/15004750	This study suggests that possession of the IFNA allele with higher levels of IFN-alpha significantly increases the risk of sarcoidosis.	IFN-alpha|3439@9606	IFNA|3440@9606	0.63807
PMID.dPMID4086883.s3.p0	http://www.ncbi.nlm.nih.gov/pubmed/4086883	http://colonet.informatik.hu-berlin.de/geneview/view/abstract/4086883	Recombinant human interferon-alpha A/D (IFN-alpha A/D) is known to act on murine cells.	IFN-alpha|3439@9606	interferon-alpha A|3440@9606	0.409127
PMID.dPMID9204955.s3.p0	http://www.ncbi.nlm.nih.gov/pubmed/9204955	http://colonet.informatik.hu-berlin.de/geneview/view/abstract/9204955	This study was conducted to determine whether interferon-alpha-2b (IFN-alpha-2b) can be encapsulated in liposomes without compromising its anti-fibrogenic effects on human dermal fibroblasts.	IFN-alpha|3439@9606	interferon-alpha-2b|3440@9606	0.397276
PMID.dPMID10470819.s4.p2	http://www.ncbi.nlm.nih.gov/pubmed/10470819	http://colonet.informatik.hu-berlin.de/geneview/view/abstract/10470819	The results of these investigations are important for all meningioma therapies that, similar to interferon-alpha-2B (IFNalpha-2B), depend on activation of this pathway for their effect.	IFNalpha|3439@9606	interferon-alpha-2B|3440@9606	0.391406
PMID.dPMID2988456.s4.p0	http://www.ncbi.nlm.nih.gov/pubmed/2988456	http://colonet.informatik.hu-berlin.de/geneview/view/abstract/2988456	Human recombinant interferon-alpha A/D (IFN-alpha A/D) is known to be effective on murine cells.	IFN-alpha|3439@9606	interferon-alpha A|3440@9606	0.372639
PMID.dPMID4004283.s3.p0	http://www.ncbi.nlm.nih.gov/pubmed/4004283	http://colonet.informatik.hu-berlin.de/geneview/view/abstract/4004283	Human recombinant interferon-alpha A/D (IFN-alpha A/D) is known to be as active on murine cells as on human cells.	IFN-alpha|3439@9606	interferon-alpha A|3440@9606	0.316369
PMID.dPMID8091933.s3.p0	http://www.ncbi.nlm.nih.gov/pubmed/8091933	http://colonet.informatik.hu-berlin.de/geneview/view/abstract/8091933	We report the disease characteristics and therapeutic results for 25 patients suffering from essential thrombocythaemia (ET), treated with recombinant interferon-alpha-2b (IFN-alpha 2b).	IFN-alpha|3439@9606	interferon-alpha-2b|3440@9606	0.247622
PMID.dPMID9793270.s4.p0	http://www.ncbi.nlm.nih.gov/pubmed/9793270	http://colonet.informatik.hu-berlin.de/geneview/view/abstract/9793270	It has been suggested that interferon-alpha 2b (IFN-alpha 2b) may be useful in the treatment of chronic refractory ITP patients.	IFN-alpha|3439@9606	interferon-alpha 2b|3440@9606	0.246296
Sentences between IFIT3 and IFNA13
PMID.dPMID17933493.s5.p0	http://www.ncbi.nlm.nih.gov/pubmed/17933493	http://colonet.informatik.hu-berlin.de/geneview/view/abstract/17933493	We found that IFN-alpha failed in inducing IFIT4 in STAT1-negative U3A cells.	IFIT4|3437@9606	IFN-alpha|3439@9606	0.646759
PMID.dPMID18067071.s11.p0	http://www.ncbi.nlm.nih.gov/pubmed/18067071	http://colonet.informatik.hu-berlin.de/geneview/view/abstract/18067071	RIG-G is a target gene directly regulated by STAT1 protein and should play a key role in IFNalpha signaling pathways.	IFNalpha|3439@9606	RIG-G|3437@9606	0.544206
PMID.dPMID18067071.s10.p2	http://www.ncbi.nlm.nih.gov/pubmed/18067071	http://colonet.informatik.hu-berlin.de/geneview/view/abstract/18067071	ISREs present in RIG-G promoter region are molecular basis of IFNalpha induced RIG-G expression.	RIG-G|3437@9606	IFNalpha|3439@9606	0.539465
PMID.dPMID18067071.s10.p0	http://www.ncbi.nlm.nih.gov/pubmed/18067071	http://colonet.informatik.hu-berlin.de/geneview/view/abstract/18067071	ISREs present in RIG-G promoter region are molecular basis of IFNalpha induced RIG-G expression.	IFNalpha|3439@9606	RIG-G|3437@9606	0.38474
PMC.dPMC21366908.s229.p3	http://www.ncbi.nlm.nih.gov/pubmed/21366908	http://colonet.informatik.hu-berlin.de/geneview/view/abstract/21366908	Other IFN genes without elevation in the high ANA HC group shown with black symbols are: IFI6, HES4, ISG15, OAS1, IFIT3, HERC5, EIF2AK2.	IFIT3|3437@9606	IFN|3439@9606	0.349119
PMID.dPMID17050680.s8.p1	http://www.ncbi.nlm.nih.gov/pubmed/17050680	http://colonet.informatik.hu-berlin.de/geneview/view/abstract/17050680	In addition, our studies reveal that Rig-G is a direct target of STAT1, a key transcription factor in regulating IFN responses, and may be one of the first experimentally proven molecular mediators for the antiproliferative effect of IFN-alpha.	IFN-alpha|3439@9606	Rig-G|3437@9606	0.21993
PMID.dPMID20403236.s10.p5	http://www.ncbi.nlm.nih.gov/pubmed/20403236	http://colonet.informatik.hu-berlin.de/geneview/view/abstract/20403236	The complex STAT2/IRF-9 is the key factor mediating the expression of RIG-G gene regulated by IFN-alpha.	IFN-alpha|3439@9606	RIG-G|3437@9606	0.1968
PMID.dPMID20403236.s4.p5	http://www.ncbi.nlm.nih.gov/pubmed/20403236	http://colonet.informatik.hu-berlin.de/geneview/view/abstract/20403236	The expression of STAT1, p-STAT1 and RIG-G in IFN-alpha-treated NB4 cells was detected by Western blot.	IFN-alpha|3439@9606	RIG-G|3437@9606	0.144442
PMID.dPMID17050680.s9.p2	http://www.ncbi.nlm.nih.gov/pubmed/17050680	http://colonet.informatik.hu-berlin.de/geneview/view/abstract/17050680	Considering that IFN-alpha and ATRA synergistically inhibit growth along the intracellular pathways triggered by the two compounds in many cell types, we suggest that Rig-G may also represent one of the key molecular nodes of signaling cross-talk between ATRA and IFN-alpha.	IFN-alpha|3439@9606	Rig-G|3437@9606	0.126492
PMID.dPMID9207104.s6.p0	http://www.ncbi.nlm.nih.gov/pubmed/9207104	http://colonet.informatik.hu-berlin.de/geneview/view/abstract/9207104	ATRA treatment induces the transcriptional expression of RIG-G relatively late (12-24 hr) in a protein synthesis-dependent manner, whereas IFN-alpha induces its expression early (30 min to 3 hr).	IFN-alpha|3439@9606	RIG-G|3437@9606	0.120975
Sentences between IFNA13 and EGFR
PMID.dPMID14684586.s10.p1	http://www.ncbi.nlm.nih.gov/pubmed/14684586	http://colonet.informatik.hu-berlin.de/geneview/view/abstract/14684586	The antiproliferative action of IFN-alpha could not block the signal transduction of the EGF-EGFR pathway.	EGFR|1956@9606	IFN-alpha|3439@9606	0.995199
PMID.dPMID14684586.s9.p0	http://www.ncbi.nlm.nih.gov/pubmed/14684586	http://colonet.informatik.hu-berlin.de/geneview/view/abstract/14684586	Our results indicate that cytostatic concentrations of IFN-alpha can enhance cell surface and intracellular EGFR expression in a proportion of human colon cancer cells.	EGFR|1956@9606	IFN-alpha|3439@9606	0.68565
PMID.dPMID12700650.s8.p0	http://www.ncbi.nlm.nih.gov/pubmed/12700650	http://colonet.informatik.hu-berlin.de/geneview/view/abstract/12700650	On the basis of these results, we have hypothesized that the increased EGF-R expression and function could represent an inducible survival response that might protect tumor cells from apoptosis caused by IFNalpha via extracellular signal regulated kinase 1 and 2 (Erk-1/2) cascades.	IFNalpha|3439@9606	EGF-R|1956@9606	0.641574
PMID.dPMID8845479.s7.p0	http://www.ncbi.nlm.nih.gov/pubmed/8845479	http://colonet.informatik.hu-berlin.de/geneview/view/abstract/8845479	Scatchard analyses of binding data showed that IFN-alpha treatment leads to an increase of EGFR number in three out of four cell lines and to a decrease of EGFR number in one out of four (CaKi-1).	EGFR|1956@9606	IFN-alpha|3439@9606	0.595865
PMID.dPMID12700650.s6.p1	http://www.ncbi.nlm.nih.gov/pubmed/12700650	http://colonet.informatik.hu-berlin.de/geneview/view/abstract/12700650	At the same time, IFNalpha increases the expression and function of the epidermal growth factor receptor (EGF-R).	EGF-R|1956@9606	IFNalpha|3439@9606	0.341129
PMID.dPMID14684586.s1.p0	http://www.ncbi.nlm.nih.gov/pubmed/14684586	http://colonet.informatik.hu-berlin.de/geneview/view/abstract/14684586	Regulation of epidermal growth factor receptor in human colon cancer cell lines by interferon alpha.	interferon alpha|3439@9606	epidermal growth factor receptor|1956@9606	0.308615
PMID.dPMID12789268.s7.p0	http://www.ncbi.nlm.nih.gov/pubmed/12789268	http://colonet.informatik.hu-berlin.de/geneview/view/abstract/12789268	Although ErbB receptors have been shown to crosscommunicate with various other receptors, our results show for the first time that the IFN-alpha receptor can crosscommunicate with ErbB3.	IFN-alpha|3439@9606	ErbB|1956@9606	0.274887
PMID.dPMID12700650.s6.p0	http://www.ncbi.nlm.nih.gov/pubmed/12700650	http://colonet.informatik.hu-berlin.de/geneview/view/abstract/12700650	At the same time, IFNalpha increases the expression and function of the epidermal growth factor receptor (EGF-R).	epidermal growth factor receptor|1956@9606	IFNalpha|3439@9606	0.272611
PMC.dPMC16060964.s158.p404	http://www.ncbi.nlm.nih.gov/pubmed/16060964	http://colonet.informatik.hu-berlin.de/geneview/view/abstract/16060964	ATM Ataxia telangiectasia BAD BCL2-antagonist of cell death BAK BCL2-antagonist/killer 1 BAX BCL2-associated ├ù protein BCGF1 B-cell growth factor BCL2- A1 BCL2-related protein A1 BCL2 B-cell CLL/lymphoma 2 Bcl-xL BCL2-like 1 CUL-5 Cullin 5 BCLW BCL2-like 2 Bik/Nbk BCL2-interacting killer/ natural-born killer BMP8 Bone morphogenetic protein 8 CASP10 Apoptotic cysteine protease MCH4 CASP8 Apoptoti…	IFN-alpha|3439@9606	EGFR|1956@9606	0.261903
PMID.dPMID8845479.s7.p1	http://www.ncbi.nlm.nih.gov/pubmed/8845479	http://colonet.informatik.hu-berlin.de/geneview/view/abstract/8845479	Scatchard analyses of binding data showed that IFN-alpha treatment leads to an increase of EGFR number in three out of four cell lines and to a decrease of EGFR number in one out of four (CaKi-1).	EGFR|1956@9606	IFN-alpha|3439@9606	0.235978
Sentences between IL3 and IFNA13
PMID.dPMID14610485.s1.p0	http://www.ncbi.nlm.nih.gov/pubmed/14610485	http://colonet.informatik.hu-berlin.de/geneview/view/abstract/14610485	IFN-alpha inhibits IL-3 priming of human basophil cytokine secretion but not leukotriene C4 and histamine release.	IL-3|3562@9606	IFN-alpha|3439@9606	127407
PMID.dPMID1719612.s1.p0	http://www.ncbi.nlm.nih.gov/pubmed/1719612	http://colonet.informatik.hu-berlin.de/geneview/view/abstract/1719612	Interferons and the colony-stimulating factors IL-3 and GM-CSF enhance the IFN-alpha response in human blood leucocytes induced by herpes simplex virus.	IFN-alpha|3439@9606	IL-3|3562@9606	0.737315
PMID.dPMID14610485.s9.p0	http://www.ncbi.nlm.nih.gov/pubmed/14610485	http://colonet.informatik.hu-berlin.de/geneview/view/abstract/14610485	IFN-alpha specifically inhibited the effects IL-3 has on basophil cytokine secretion.	IL-3|3562@9606	IFN-alpha|3439@9606	0.581283
PMID.dPMID9506460.s7.p0	http://www.ncbi.nlm.nih.gov/pubmed/9506460	http://colonet.informatik.hu-berlin.de/geneview/view/abstract/9506460	The production of IL-3 by T helper cells was significantly inhibited by IFN-alpha as well.	IFN-alpha|3439@9606	IL-3|3562@9606	0.507674
PMID.dPMID7518712.s17.p4	http://www.ncbi.nlm.nih.gov/pubmed/7518712	http://colonet.informatik.hu-berlin.de/geneview/view/abstract/7518712	In particular, tyk2 is required for the responses initiated by IFN-alpha while Jak2 has been implicated in the responses to G-CSF, IL-3, EPO, growth hormone, prolactin and IFN-gamma.(ABSTRACT	IL-3|3562@9606	IFN-alpha|3439@9606	0.450201
PMID.dPMID14610485.s6.p0	http://www.ncbi.nlm.nih.gov/pubmed/14610485	http://colonet.informatik.hu-berlin.de/geneview/view/abstract/14610485	Basophils isolated from blood were treated with IFN-alpha in the presence and absence of IL-3 priming before stimulating through the IgE receptor to release histamine, leukotriene C4, and IL-4.	IL-3|3562@9606	IFN-alpha|3439@9606	0.284768
PMID.dPMID1719612.s8.p0	http://www.ncbi.nlm.nih.gov/pubmed/1719612	http://colonet.informatik.hu-berlin.de/geneview/view/abstract/1719612	The IL-3 and GM-CSF, especially in combination with IFN-alpha, had the most pronounced enhancing effects on IPC numbers when PBMC were induced at low cell concentrations.	IFN-alpha|3439@9606	IL-3|3562@9606	0.261235
PMID.dPMID11207245.s11.p0	http://www.ncbi.nlm.nih.gov/pubmed/11207245	http://colonet.informatik.hu-berlin.de/geneview/view/abstract/11207245	Unlike IFN-alpha, IL-3 was a potent survival factor and induced the maturation of CD11c(-) DCs.	IL-3|3562@9606	IFN-alpha|3439@9606	0.195509
PMID.dPMID8103535.s8.p9	http://www.ncbi.nlm.nih.gov/pubmed/8103535	http://colonet.informatik.hu-berlin.de/geneview/view/abstract/8103535	The results suggest that LFA-1 (CD11a/CD18) participates in the early phase of the IFN-alpha response and may be activated by cytokines such as IL-3 and GM-CSF.	IL-3|3562@9606	IFN-alpha|3439@9606	0.149875
PMID.dPMID14610485.s12.p1	http://www.ncbi.nlm.nih.gov/pubmed/14610485	http://colonet.informatik.hu-berlin.de/geneview/view/abstract/14610485	Furthermore, IFN-alpha blocked IL-13 secretion directly induced by IL-3.	IL-3|3562@9606	IFN-alpha|3439@9606	0.142594
Sentences between TYMP and IFNA13
PMID.dPMID10412941.s11.p0	http://www.ncbi.nlm.nih.gov/pubmed/10412941	http://colonet.informatik.hu-berlin.de/geneview/view/abstract/10412941	These results suggest that IFN-alpha upregulates TP expression and modulates 5-FU anabolism thus enhancing 5-FU cytotoxicity in a dose- and schedule-dependent manner in some RCC cells.	TP|1890@9606	IFN-alpha|3439@9606	0.828912
PMID.dPMID19024520.s5.p0	http://www.ncbi.nlm.nih.gov/pubmed/19024520	http://colonet.informatik.hu-berlin.de/geneview/view/abstract/19024520	Whether the JAK-STAT cascade mediates IFN-alpha-induced TP mRNA expression was studied by pretreatment with Janus Kinase (JAK) inhibitor, AG-490.	TP|1890@9606	IFN-alpha|3439@9606	0.705812
PMID.dPMID19024520.s6.p0	http://www.ncbi.nlm.nih.gov/pubmed/19024520	http://colonet.informatik.hu-berlin.de/geneview/view/abstract/19024520	Effects of IFN-alpha on TP mRNA stability were detected with additional actinomycin D.	TP|1890@9606	IFN-alpha|3439@9606	0.591572
PMID.dPMID10412941.s8.p0	http://www.ncbi.nlm.nih.gov/pubmed/10412941	http://colonet.informatik.hu-berlin.de/geneview/view/abstract/10412941	IFN-alpha enhanced TP expression in a dose-dependent manner in three of five RCC cell lines (P < 0.05).	TP|1890@9606	IFN-alpha|3439@9606	0.506874
PMID.dPMID19024520.s12.p0	http://www.ncbi.nlm.nih.gov/pubmed/19024520	http://colonet.informatik.hu-berlin.de/geneview/view/abstract/19024520	IFN-alpha at certain doses upregulates TP mRNA expression via both JAK-STAT transcriptional activation and post-transcriptional mRNA stabilization in human hepatocellular carcinoma SMMC-7721 cells.	TP|1890@9606	IFN-alpha|3439@9606	0.45376
PMID.dPMID17988526.s8.p0	http://www.ncbi.nlm.nih.gov/pubmed/17988526	http://colonet.informatik.hu-berlin.de/geneview/view/abstract/17988526	When SMMC-7721 cells was cultured with the concentration 10 000 U/ml IFN-alpha, the level of TP mRNA rose at 8hr, reached the peak value at 12hr, and remained high level up to 72hr.	TP|1890@9606	IFN-alpha|3439@9606	0.391368
PMID.dPMID17988526.s14.p0	http://www.ncbi.nlm.nih.gov/pubmed/17988526	http://colonet.informatik.hu-berlin.de/geneview/view/abstract/17988526	IFN-alpha enhanced cytotoxicity of 5'-dFUrd against SMMC-7721 cells positively related to its induction of TP mRNA.	TP|1890@9606	IFN-alpha|3439@9606	0.351393
PMID.dPMID17988526.s6.p0	http://www.ncbi.nlm.nih.gov/pubmed/17988526	http://colonet.informatik.hu-berlin.de/geneview/view/abstract/17988526	Expression levels of TP mRNA was elevated in SMMC-7721 cells after cultured with IFN-alpha, which was a concentration- and time-dependent increase.	IFN-alpha|3439@9606	TP|1890@9606	0.31302
PMID.dPMID19024520.s8.p0	http://www.ncbi.nlm.nih.gov/pubmed/19024520	http://colonet.informatik.hu-berlin.de/geneview/view/abstract/19024520	TP mRNA levels rose at 8 h, reached the peak value at 12 h, and remained at a high level up to 72 h in SMMC-7721 cells treated with IFN-alpha 10000 U/ml.	IFN-alpha|3439@9606	TP|1890@9606	0.254256
PMID.dPMID10412941.s9.p1	http://www.ncbi.nlm.nih.gov/pubmed/10412941	http://colonet.informatik.hu-berlin.de/geneview/view/abstract/10412941	The relative IFN-alpha-induced increase in sensitivity to 5-FU correlated with the relative IFN-alpha-induced increase in TP expression (P < 0.05).	TP|1890@9606	IFN-alpha|3439@9606	0.248575
Sentences between IRF5 and IFNA13
PMID.dPMID18075793.s6.p0	http://www.ncbi.nlm.nih.gov/pubmed/18075793	http://colonet.informatik.hu-berlin.de/geneview/view/abstract/18075793	One of the key genes of the IFN-alpha pathway, IRF5, was found to be strongly associated with SLE.	IRF5|3663@9606	IFN-alpha|3439@9606	0.730106
PMID.dPMID19854706.s12.p2	http://www.ncbi.nlm.nih.gov/pubmed/19854706	http://colonet.informatik.hu-berlin.de/geneview/view/abstract/19854706	In European-derived individuals, an IRF5 haplotype was associated with increased IRF5, IFNalpha and IFN-inducible chemokine expression.	IFNalpha|3439@9606	IRF5|3663@9606	0.61089
PMID.dPMID19854706.s9.p0	http://www.ncbi.nlm.nih.gov/pubmed/19854706	http://colonet.informatik.hu-berlin.de/geneview/view/abstract/19854706	A haplotype containing these risk alleles of rs13242262, rs10488631 and rs2280714 was associated with increased IRF5, IFNalpha and IFN-inducible chemokine expression in CEU LCLs.	IFNalpha|3439@9606	IRF5|3663@9606	0.563619
PMID.dPMID19854706.s12.p1	http://www.ncbi.nlm.nih.gov/pubmed/19854706	http://colonet.informatik.hu-berlin.de/geneview/view/abstract/19854706	In European-derived individuals, an IRF5 haplotype was associated with increased IRF5, IFNalpha and IFN-inducible chemokine expression.	IFNalpha|3439@9606	IRF5|3663@9606	0.533277
PMC.dPMC21635716.s24.p0	http://www.ncbi.nlm.nih.gov/pubmed/21635716	http://colonet.informatik.hu-berlin.de/geneview/view/abstract/21635716	IRF5-/- mice are highly vulnerable to both DNA and RNA viruses and infection of them was accompanied by low IFNalpha concentrations in the sera [].	IFNalpha|3439@9606	IRF5|27056@10090	0.41305
PMID.dPMID18668568.s4.p0	http://www.ncbi.nlm.nih.gov/pubmed/18668568	http://colonet.informatik.hu-berlin.de/geneview/view/abstract/18668568	The aim of this study was to determine whether the IRF5 SLE risk haplotype mediates the risk of SLE by predisposing patients to the development of high levels of serum IFNalpha activity.	IFNalpha|3439@9606	IRF5|3663@9606	0.385331
PMID.dPMID18668568.s1.p0	http://www.ncbi.nlm.nih.gov/pubmed/18668568	http://colonet.informatik.hu-berlin.de/geneview/view/abstract/18668568	Association of the IRF5 risk haplotype with high serum interferon-alpha activity in systemic lupus erythematosus patients.	interferon-alpha|3439@9606	IRF5|3663@9606	0.356365
PMID.dPMID19854706.s1.p0	http://www.ncbi.nlm.nih.gov/pubmed/19854706	http://colonet.informatik.hu-berlin.de/geneview/view/abstract/19854706	Association of IRF5 polymorphisms with activation of the interferon alpha pathway.	interferon alpha|3439@9606	IRF5|3663@9606	0.294013
PMC.dPMC21635716.s23.p2	http://www.ncbi.nlm.nih.gov/pubmed/21635716	http://colonet.informatik.hu-berlin.de/geneview/view/abstract/21635716	Infection of cells with various viruses can activate Toll-like receptors (TLRs) and, further downstream, IRF5 to induce IFNalpha and the transcription of numerous inflammatory proteins [].	IFNalpha|3439@9606	IRF5|27056@10090	0.217952
PMID.dPMID15805103.s11.p0	http://www.ncbi.nlm.nih.gov/pubmed/15805103	http://colonet.informatik.hu-berlin.de/geneview/view/abstract/15805103	The results of this study demonstrated the existence of multiple IRF-5 spliced isoforms with distinct cell type-specific expression, cellular localization, differential regulation, and dissimilar functions in virus-mediated type I IFN gene induction.	IFN|3439@9606	IRF-5|3663@9606	0.157165
Interactions for TNF(7124)
Sentences between TNF and IL6
PMID.dPMID12202945.s11.p0	http://www.ncbi.nlm.nih.gov/pubmed/12202945	http://colonet.informatik.hu-berlin.de/geneview/view/abstract/12202945	Our results suggest that IL-6 and TNF-alpha are involved in male fertility.	TNF-alpha|7124@9606	IL-6|3569@9606	174563
PMID.dPMID12242080.s7.p0	http://www.ncbi.nlm.nih.gov/pubmed/12242080	http://colonet.informatik.hu-berlin.de/geneview/view/abstract/12242080	Significant association between TNF-alpha and IL-6 (r=0.28, r=0.43;	IL-6|3569@9606	TNF-alpha|7124@9606	156667
PMID.dPMID1768380.s9.p0	http://www.ncbi.nlm.nih.gov/pubmed/1768380	http://colonet.informatik.hu-berlin.de/geneview/view/abstract/1768380	Our data indicate an association between HIV, IL-6, TNF-alpha and hypergammaglobulinemia.	TNF-alpha|7124@9606	IL-6|3569@9606	151896
PMID.dPMID16785562.s14.p0	http://www.ncbi.nlm.nih.gov/pubmed/16785562	http://colonet.informatik.hu-berlin.de/geneview/view/abstract/16785562	The balance between TNF-alpha and IL-6 during the early phase of infection controls the development of the inflammatory response to R. aurantiacus infection.	IL-6|16193@10090	TNF-alpha|21926@10090	144698
PMID.dPMID9973433.s4.p0	http://www.ncbi.nlm.nih.gov/pubmed/9973433	http://colonet.informatik.hu-berlin.de/geneview/view/abstract/9973433	Previous reports showed that VIP/PACAP inhibit IL-6 and TNF-alpha production in LPS-stimulated macrophages.	TNF-alpha|21926@10090	IL-6|16193@10090	141919
PMID.dPMID9727279.s10.p0	http://www.ncbi.nlm.nih.gov/pubmed/9727279	http://colonet.informatik.hu-berlin.de/geneview/view/abstract/9727279	In conclusions, our results suggest that IL-6 and TNF-alpha are involved during the onset of an acute attack of asthma once the threshold limit has been passed.	TNF-alpha|7124@9606	IL-6|3569@9606	140942
PMID.dPMID8928089.s1.p0	http://www.ncbi.nlm.nih.gov/pubmed/8928089	http://colonet.informatik.hu-berlin.de/geneview/view/abstract/8928089	TNF-alpha suppresses IL-6 upregulation of protein S in HepG-2 hepatoma cells.	IL-6|3569@9606	TNF-alpha|7124@9606	140415
PMID.dPMID12383455.s10.p0	http://www.ncbi.nlm.nih.gov/pubmed/12383455	http://colonet.informatik.hu-berlin.de/geneview/view/abstract/12383455	These results suggest that TNF-alpha and IL-6 are involved in endotoxin-induced anorexia in humans.	IL-6|3569@9606	TNF-alpha|7124@9606	13806
PMID.dPMID17957100.s14.p0	http://www.ncbi.nlm.nih.gov/pubmed/17957100	http://colonet.informatik.hu-berlin.de/geneview/view/abstract/17957100	TNF-alpha and IL-6 may be involved in the pathophysiologic process.	IL-6|3569@9606	TNF-alpha|7124@9606	137424
PMID.dPMID12080455.s14.p0	http://www.ncbi.nlm.nih.gov/pubmed/12080455	http://colonet.informatik.hu-berlin.de/geneview/view/abstract/12080455	Only IL-6 was associated with smoking while TNFalpha was correlated with hyperinsulinaemia.	TNFalpha|7124@9606	IL-6|3569@9606	134064
Sentences between TNF and IFNG
PMID.dPMID2512345.s13.p0	http://www.ncbi.nlm.nih.gov/pubmed/2512345	http://colonet.informatik.hu-berlin.de/geneview/view/abstract/2512345	Hemin and Sn-protoporphyrin stimulate TNF-alpha and IFN-gamma production by PBMC.	IFN-gamma|3458@9606	TNF-alpha|7124@9606	168265
PMID.dPMID9631453.s8.p0	http://www.ncbi.nlm.nih.gov/pubmed/9631453	http://colonet.informatik.hu-berlin.de/geneview/view/abstract/9631453	TNF-alpha induced IFN-gamma production by astrocytes was confirmed by using immunocytochemical staining.	IFN-gamma|25712@10116	TNF-alpha|24835@10116	158409
PMID.dPMID20060062.s9.p0	http://www.ncbi.nlm.nih.gov/pubmed/20060062	http://colonet.informatik.hu-berlin.de/geneview/view/abstract/20060062	Taken together, these results show an evident imbalance between TNF-alpha and IFN-gamma that is unfavorable to amastigote replication control.	IFN-gamma|15978@10090	TNF-alpha|21926@10090	157335
PMID.dPMID8980289.s6.p0	http://www.ncbi.nlm.nih.gov/pubmed/8980289	http://colonet.informatik.hu-berlin.de/geneview/view/abstract/8980289	There was a synergistic effect between IFNgamma and TNFalpha.	TNFalpha|7124@9606	IFNgamma|3458@9606	156342
PMID.dPMID9439159.s10.p0	http://www.ncbi.nlm.nih.gov/pubmed/9439159	http://colonet.informatik.hu-berlin.de/geneview/view/abstract/9439159	There was a good correlation between IFN-gamma and TNF-alpha.	TNF-alpha|7124@9606	IFN-gamma|3458@9606	150613
PMID.dPMID11431420.s9.p0	http://www.ncbi.nlm.nih.gov/pubmed/11431420	http://colonet.informatik.hu-berlin.de/geneview/view/abstract/11431420	We further demonstrate synergy between IL-12 and the proinflammatory cytokine TNF-alpha in driving IFN-gamma production.	IFN-gamma|15978@10090	TNF-alpha|21926@10090	144935
PMID.dPMID12388374.s5.p0	http://www.ncbi.nlm.nih.gov/pubmed/12388374	http://colonet.informatik.hu-berlin.de/geneview/view/abstract/12388374	Our results indicate that TNF-alpha and IFN-gamma synergistically induce RANTES protein secretion and mRNA expression.	IFN-gamma|3458@9606	TNF-alpha|7124@9606	14274
PMID.dPMID17964857.s4.p0	http://www.ncbi.nlm.nih.gov/pubmed/17964857	http://colonet.informatik.hu-berlin.de/geneview/view/abstract/17964857	IFN-gamma and TNF-alpha have been implicated in intestinal barrier dysfunction.	TNF-alpha|7124@9606	IFN-gamma|3458@9606	136776
PMID.dPMID12162877.s8.p0	http://www.ncbi.nlm.nih.gov/pubmed/12162877	http://colonet.informatik.hu-berlin.de/geneview/view/abstract/12162877	These results suggest that TNF-alpha and IFN-gamma play a protective role in acute infection with HSV-1.	IFN-gamma|15978@10090	TNF-alpha|21926@10090	13104
PMID.dPMID12162877.s1.p0	http://www.ncbi.nlm.nih.gov/pubmed/12162877	http://colonet.informatik.hu-berlin.de/geneview/view/abstract/12162877	Role of IFN-gamma and tumor necrosis factor-alpha in herpes simplex virus type 1 infection.	tumor necrosis factor-alpha|21926@10090	IFN-gamma|15978@10090	12853
Sentences between IL1B and TNF
PMID.dPMID12794819.s11.p0	http://www.ncbi.nlm.nih.gov/pubmed/12794819	http://colonet.informatik.hu-berlin.de/geneview/view/abstract/12794819	There was no synergistic effect between IL-1beta and TNFalpha.	TNFalpha|7124@9606	IL-1beta|3553@9606	162784
PMID.dPMID12150702.s7.p0	http://www.ncbi.nlm.nih.gov/pubmed/12150702	http://colonet.informatik.hu-berlin.de/geneview/view/abstract/12150702	Among the most important pro-inflammatory cytokines are TNF-alpha and IL-1beta.	IL-1beta|3553@9606	TNF-alpha|7124@9606	148379
PMID.dPMID18583302.s14.p0	http://www.ncbi.nlm.nih.gov/pubmed/18583302	http://colonet.informatik.hu-berlin.de/geneview/view/abstract/18583302	TNF-alpha and IL-1beta significantly increase p38 expression.	IL-1beta|3553@9606	TNF-alpha|7124@9606	142712
PMC.dPMC16171525.s98.p0	http://www.ncbi.nlm.nih.gov/pubmed/16171525	http://colonet.informatik.hu-berlin.de/geneview/view/abstract/16171525	IL-1b and TNF-alpha are involved in liver fibrogenesis [].	TNF-alpha|7124@9606	IL-1b|3553@9606	140432
PMID.dPMID12550106.s13.p0	http://www.ncbi.nlm.nih.gov/pubmed/12550106	http://colonet.informatik.hu-berlin.de/geneview/view/abstract/12550106	PGE inhibit lipopolysaccharide-stimulated TNF-alpha and IL-1beta production in human whole blood cultures.	IL-1beta|3553@9606	TNF-alpha|7124@9606	140016
PMID.dPMID14552679.s13.p0	http://www.ncbi.nlm.nih.gov/pubmed/14552679	http://colonet.informatik.hu-berlin.de/geneview/view/abstract/14552679	IL-1beta and TNF-alpha are involved in infectious brain edema by IBE.	TNF-alpha|24835@10116	IL-1beta|24494@10116	134932
PMID.dPMID16636588.s10.p0	http://www.ncbi.nlm.nih.gov/pubmed/16636588	http://colonet.informatik.hu-berlin.de/geneview/view/abstract/16636588	Intracellular calcium was increased by TNF-alpha and IL-1beta.	IL-1beta|3553@9606	TNF-alpha|7124@9606	134246
PMID.dPMID20026360.s10.p0	http://www.ncbi.nlm.nih.gov/pubmed/20026360	http://colonet.informatik.hu-berlin.de/geneview/view/abstract/20026360	Our results show that LPS-induced IL-1beta and TNF-alpha production by PBMCs was significantly reversed by meprin-alpha specific siRNA.	TNF-alpha|7124@9606	IL-1beta|3553@9606	133132
PMID.dPMID22428219.s9.p0	http://www.ncbi.nlm.nih.gov/pubmed/22428219	http://colonet.informatik.hu-berlin.de/geneview/view/abstract/22428219	No significant association between HA and TNF-alpha or IL-1beta was found.	IL-1beta|3553@9606	TNF-alpha|7124@9606	129167
PMID.dPMID11956032.s6.p0	http://www.ncbi.nlm.nih.gov/pubmed/11956032	http://colonet.informatik.hu-berlin.de/geneview/view/abstract/11956032	We hypothesized that IL-1beta and TNF-alpha would increase GM-CSF mRNA and protein production in NT2 cells.	TNF-alpha|7124@9606	IL-1beta|3553@9606	128938
Sentences between IL10 and TNF
PMID.dPMID12496396.s1.p0	http://www.ncbi.nlm.nih.gov/pubmed/12496396	http://colonet.informatik.hu-berlin.de/geneview/view/abstract/12496396	Critical paracrine interactions between TNF-alpha and IL-10 regulate lipopolysaccharide-stimulated human choriodecidual cytokine and prostaglandin E2 production.	IL-10|3586@9606	TNF-alpha|7124@9606	15753
PMID.dPMID7547677.s8.p0	http://www.ncbi.nlm.nih.gov/pubmed/7547677	http://colonet.informatik.hu-berlin.de/geneview/view/abstract/7547677	On the basis of these results, we conclude that TNF-alpha is involved in the up-regulation of its antagonist IL-10.	IL-10|3586@9606	TNF-alpha|7124@9606	143693
PMID.dPMID12217215.s9.p0	http://www.ncbi.nlm.nih.gov/pubmed/12217215	http://colonet.informatik.hu-berlin.de/geneview/view/abstract/12217215	TNF-alpha and IL-10 secretion by AM paralleled mRNA expression.	IL-10|16153@10090	TNF-alpha|21926@10090	141039
PMID.dPMID19744138.s9.p0	http://www.ncbi.nlm.nih.gov/pubmed/19744138	http://colonet.informatik.hu-berlin.de/geneview/view/abstract/19744138	Our results suggest that TNFalpha and IL-10 promoter polymorphism might be a risk factor for AD.	IL-10|3586@9606	TNFalpha|7124@9606	140764
PMID.dPMID11176172.s10.p0	http://www.ncbi.nlm.nih.gov/pubmed/11176172	http://colonet.informatik.hu-berlin.de/geneview/view/abstract/11176172	Normal monocytes increased TNF-alpha and IL-10 release in response to endotoxin.	IL-10|3586@9606	TNF-alpha|7124@9606	140689
PMID.dPMID19673019.s1.p0	http://www.ncbi.nlm.nih.gov/pubmed/19673019	http://colonet.informatik.hu-berlin.de/geneview/view/abstract/19673019	IL-10 and TNF-alpha promoter haplotypes are associated with childhood Crohn's disease location.	TNF-alpha|7124@9606	IL-10|3586@9606	139726
PMID.dPMID20576226.s5.p0	http://www.ncbi.nlm.nih.gov/pubmed/20576226	http://colonet.informatik.hu-berlin.de/geneview/view/abstract/20576226	Our results indicate that IL-10 A/T/A-A/T/A genotype was associated with Taiwanese SLE, whereas no significance was observed between TNF-alpha genotype and SLE.	TNF-alpha|7124@9606	IL-10|3586@9606	139158
PMID.dPMID11469886.s5.p0	http://www.ncbi.nlm.nih.gov/pubmed/11469886	http://colonet.informatik.hu-berlin.de/geneview/view/abstract/11469886	Exogenous IL-10 inhibits NF-kappaB in monocytes and thus attenuates TNF-alpha production.	TNF-alpha|7124@9606	IL-10|3586@9606	13448
PMID.dPMID20576226.s1.p0	http://www.ncbi.nlm.nih.gov/pubmed/20576226	http://colonet.informatik.hu-berlin.de/geneview/view/abstract/20576226	IL-10 and TNF-alpha promoter polymorphisms in susceptibility to systemic lupus erythematosus in Taiwan.	TNF-alpha|7124@9606	IL-10|3586@9606	134365
PMID.dPMID11493622.s1.p0	http://www.ncbi.nlm.nih.gov/pubmed/11493622	http://colonet.informatik.hu-berlin.de/geneview/view/abstract/11493622	Augmented TNF-alpha and IL-10 production by primed human monocytes following interaction with oxidatively modified autologous erythrocytes.	IL-10|3586@9606	TNF-alpha|7124@9606	13063
Sentences between TNF and IL8
PMID.dPMID7880976.s1.p0	http://www.ncbi.nlm.nih.gov/pubmed/7880976	http://colonet.informatik.hu-berlin.de/geneview/view/abstract/7880976	Synergism between interleukin-8 and tumor necrosis factor-alpha for neutrophil-mediated platelet activation.	tumor necrosis factor-alpha|7124@9606	interleukin-8|3576@9606	187235
PMID.dPMID16427093.s5.p0	http://www.ncbi.nlm.nih.gov/pubmed/16427093	http://colonet.informatik.hu-berlin.de/geneview/view/abstract/16427093	The alveolar macrophage-derived TNF-alpha initiates lung inflammation through its ability to stimulate IL-8 synthesis in airway epithelial cells.	IL-8|3576@9606	TNF-alpha|7124@9606	136816
PMID.dPMID7639556.s1.p0	http://www.ncbi.nlm.nih.gov/pubmed/7639556	http://colonet.informatik.hu-berlin.de/geneview/view/abstract/7639556	Faecal interleukin-8 and tumour necrosis factor-alpha concentrations in cystic fibrosis.	tumour necrosis factor-alpha|7124@9606	interleukin-8|3576@9606	132547
PMID.dPMID16134994.s1.p0	http://www.ncbi.nlm.nih.gov/pubmed/16134994	http://colonet.informatik.hu-berlin.de/geneview/view/abstract/16134994	In vivo relationship between collagenase-2 and interleukin-8 but not tumour necrosis factor-alpha in chronic rhinosinusitis with nasal polyposis.	tumour necrosis factor-alpha|7124@9606	interleukin-8|3576@9606	130684
PMID.dPMID15106406.s12.p0	http://www.ncbi.nlm.nih.gov/pubmed/15106406	http://colonet.informatik.hu-berlin.de/geneview/view/abstract/15106406	Proinflammatory cytokines TNF-alpha and IL-8 promote development of CRP.	IL-8|3576@9606	TNF-alpha|7124@9606	128388
PMID.dPMID10412778.s9.p0	http://www.ncbi.nlm.nih.gov/pubmed/10412778	http://colonet.informatik.hu-berlin.de/geneview/view/abstract/10412778	After LDL-A, IL-8 and TNF-alpha tended to decrease.	TNF-alpha|7124@9606	IL-8|3576@9606	126648
PMID.dPMID14760780.s1.p0	http://www.ncbi.nlm.nih.gov/pubmed/14760780	http://colonet.informatik.hu-berlin.de/geneview/view/abstract/14760780	Probiotics inhibit TNF-alpha-induced interleukin-8 secretion of HT29 cells.	interleukin-8|3576@9606	TNF-alpha|7124@9606	124556
PMID.dPMID10926336.s8.p0	http://www.ncbi.nlm.nih.gov/pubmed/10926336	http://colonet.informatik.hu-berlin.de/geneview/view/abstract/10926336	IL-8 and TNFalpha in supernatant was measured by ELISA method.	TNFalpha|7124@9606	IL-8|3576@9606	118248
PMID.dPMID12736467.s1.p0	http://www.ncbi.nlm.nih.gov/pubmed/12736467	http://colonet.informatik.hu-berlin.de/geneview/view/abstract/12736467	Inhibitory effect of TNF-alpha and IL-8 secretion by pimarane-type diterpenoids from Acanthopanax koreanum.	IL-8|3576@9606	TNF-alpha|7124@9606	11799
PMID.dPMID15562785.s1.p0	http://www.ncbi.nlm.nih.gov/pubmed/15562785	http://colonet.informatik.hu-berlin.de/geneview/view/abstract/15562785	[IL-8 and TNF-alpha in prostatic secretions as indications in evaluating chronic prostatitis].	TNF-alpha|7124@9606	IL-8|3576@9606	116438
Sentences between IL4 and TNF
PMID.dPMID10795524.s1.p0	http://www.ncbi.nlm.nih.gov/pubmed/10795524	http://colonet.informatik.hu-berlin.de/geneview/view/abstract/10795524	Herpes simplex virus type 2 infection of macrophages impairs IL-4-mediated inhibition of NO production through TNF-alpha-induced activation of NF-kappaB.	TNF-alpha|21926@10090	IL-4|16189@10090	12999
PMID.dPMID18992018.s1.p0	http://www.ncbi.nlm.nih.gov/pubmed/18992018	http://colonet.informatik.hu-berlin.de/geneview/view/abstract/18992018	TNF-alpha and IL-4 levels in generalized aggressive periodontitis subjects.	IL-4|3565@9606	TNF-alpha|7124@9606	124999
PMID.dPMID8132222.s9.p0	http://www.ncbi.nlm.nih.gov/pubmed/8132222	http://colonet.informatik.hu-berlin.de/geneview/view/abstract/8132222	Our results indicate that TNF-alpha can act as a differential signal for JCS cells and that its effects are modulated by IL-4.	IL-4|3565@9606	TNF-alpha|7124@9606	106565
PMID.dPMID1498097.s9.p3	http://www.ncbi.nlm.nih.gov/pubmed/1498097	http://colonet.informatik.hu-berlin.de/geneview/view/abstract/1498097	There was significant positive correlation between IL-4 and IL-2 production, and between IFN-gamma and TNF-alpha production.	TNF-alpha|7124@9606	IL-4|3565@9606	105855
PMID.dPMID8496391.s7.p0	http://www.ncbi.nlm.nih.gov/pubmed/8496391	http://colonet.informatik.hu-berlin.de/geneview/view/abstract/8496391	There seemed to be a reciprocal relation between TNF-alpha and IL-4.	IL-4|3565@9606	TNF-alpha|7124@9606	103061
PMID.dPMID12915769.s9.p0	http://www.ncbi.nlm.nih.gov/pubmed/12915769	http://colonet.informatik.hu-berlin.de/geneview/view/abstract/12915769	TNF-alpha synergized with IL-4, and to a lesser extent with IFN-gamma and IL-13, to release RANTES, IL-8 and gro-alpha.	IL-4|3565@9606	TNF-alpha|7124@9606	102377
PMID.dPMID15832052.s10.p0	http://www.ncbi.nlm.nih.gov/pubmed/15832052	http://colonet.informatik.hu-berlin.de/geneview/view/abstract/15832052	A significant correlation was found between IL-4 and TNF-alpha in EBC (rho = 0.374, p = 0.010).	TNF-alpha|7124@9606	IL-4|3565@9606	101996
PMID.dPMID9218595.s1.p0	http://www.ncbi.nlm.nih.gov/pubmed/9218595	http://colonet.informatik.hu-berlin.de/geneview/view/abstract/9218595	IL-4 protects against TNF-alpha-mediated cachexia and death during acute schistosomiasis.	TNF-alpha|21926@10090	IL-4|16189@10090	0.990332
PMID.dPMID7687617.s10.p0	http://www.ncbi.nlm.nih.gov/pubmed/7687617	http://colonet.informatik.hu-berlin.de/geneview/view/abstract/7687617	These results indicate that IL-4, but not TNF-alpha, uses a cAMP-dependent pathway to increase PBL adhesion.	TNF-alpha|7124@9606	IL-4|3565@9606	0.984727
PMID.dPMID15935300.s10.p0	http://www.ncbi.nlm.nih.gov/pubmed/15935300	http://colonet.informatik.hu-berlin.de/geneview/view/abstract/15935300	IL-4 and TNF-alpha patterns clearly differentiated between rejectors and non-rejectors.	TNF-alpha|7124@9606	IL-4|3565@9606	0.977182
Sentences between IL2 and TNF
PMID.dPMID18624934.s11.p0	http://www.ncbi.nlm.nih.gov/pubmed/18624934	http://colonet.informatik.hu-berlin.de/geneview/view/abstract/18624934	IL-2 and TNF-alpha might play a role in burning mouth syndrome.	TNF-alpha|7124@9606	IL-2|3558@9606	149319
PMID.dPMID8097322.s6.p0	http://www.ncbi.nlm.nih.gov/pubmed/8097322	http://colonet.informatik.hu-berlin.de/geneview/view/abstract/8097322	TNF-alpha and IL-2 act synergistically with IL-12 to augment IFN-gamma production.	IL-2|16183@10090	TNF-alpha|21926@10090	14411
PMID.dPMID11427636.s10.p0	http://www.ncbi.nlm.nih.gov/pubmed/11427636	http://colonet.informatik.hu-berlin.de/geneview/view/abstract/11427636	These findings support the hypothesis that the interaction between the TNF-alpha and IL-2 cytokine systems is disturbed.	IL-2|3558@9606	TNF-alpha|7124@9606	132546
PMID.dPMID8621780.s11.p0	http://www.ncbi.nlm.nih.gov/pubmed/8621780	http://colonet.informatik.hu-berlin.de/geneview/view/abstract/8621780	IL-2 increased TNF-alpha mRNA and protein expression in the liver.	TNF-alpha|21926@10090	IL-2|16183@10090	117788
PMID.dPMID10900602.s6.p0	http://www.ncbi.nlm.nih.gov/pubmed/10900602	http://colonet.informatik.hu-berlin.de/geneview/view/abstract/10900602	The non-stimulated PBMC from HIV-infected children produced more TNF-alpha and less IL-2 that C-group.	IL-2|3558@9606	TNF-alpha|7124@9606	111783
PMID.dPMID10647875.s8.p0	http://www.ncbi.nlm.nih.gov/pubmed/10647875	http://colonet.informatik.hu-berlin.de/geneview/view/abstract/10647875	After 18 h, the culture supernatant was assayed for IL-2 and TNF-alpha.	TNF-alpha|7124@9606	IL-2|3558@9606	108172
PMID.dPMID7511637.s10.p0	http://www.ncbi.nlm.nih.gov/pubmed/7511637	http://colonet.informatik.hu-berlin.de/geneview/view/abstract/7511637	All of the clones from the two groups released TNF-alpha and IL-2.	IL-2|3558@9606	TNF-alpha|7124@9606	103837
PMID.dPMID11701253.s8.p0	http://www.ncbi.nlm.nih.gov/pubmed/11701253	http://colonet.informatik.hu-berlin.de/geneview/view/abstract/11701253	There was a positive correlation between IL-2 and TNF-alpha in both cryptogenic and symptomatic WS groups.	TNF-alpha|7124@9606	IL-2|3558@9606	103189
PMID.dPMID1735193.s1.p0	http://www.ncbi.nlm.nih.gov/pubmed/1735193	http://colonet.informatik.hu-berlin.de/geneview/view/abstract/1735193	Soluble IL-2 receptor and tumour necrosis factor-alpha in plasma of haemophilia patients infected with HIV.	tumour necrosis factor-alpha|7124@9606	IL-2|3558@9606	102374
PMID.dPMID11591402.s8.p0	http://www.ncbi.nlm.nih.gov/pubmed/11591402	http://colonet.informatik.hu-berlin.de/geneview/view/abstract/11591402	TNF-alpha and IL-2 receptor levels.	IL-2|3558@9606	TNF-alpha|7124@9606	101817
Sentences between TNF and TGFB1
PMID.dPMID17554369.s9.p0	http://www.ncbi.nlm.nih.gov/pubmed/17554369	http://colonet.informatik.hu-berlin.de/geneview/view/abstract/17554369	TNF-alpha suppresses TGF-beta1-induced gene expression by affecting its mRNA stability.	TGF-beta1|7040@9606	TNF-alpha|7124@9606	147409
PMID.dPMID18307974.s4.p0	http://www.ncbi.nlm.nih.gov/pubmed/18307974	http://colonet.informatik.hu-berlin.de/geneview/view/abstract/18307974	However, molecular interactions between the TGF-beta and TNF-alpha signaling pathways have yet to be elucidated.	TNF-alpha|24835@10116	TGF-beta|59086@10116	127475
PMID.dPMID11747628.s6.p0	http://www.ncbi.nlm.nih.gov/pubmed/11747628	http://colonet.informatik.hu-berlin.de/geneview/view/abstract/11747628	Our results showed TGF-beta1 significantly increased TNF-alpha secretion by monocytes.	TNF-alpha|7124@9606	TGF-beta1|7040@9606	123418
PMID.dPMID19533439.s1.p0	http://www.ncbi.nlm.nih.gov/pubmed/19533439	http://colonet.informatik.hu-berlin.de/geneview/view/abstract/19533439	[TGF-Beta1-915G/C and TNF-alpha-308G/A polymorphisms in children with asthma].	TNF-alpha|7124@9606	TGF-Beta1|7040@9606	122415
PMID.dPMID18840428.s3.p0	http://www.ncbi.nlm.nih.gov/pubmed/18840428	http://colonet.informatik.hu-berlin.de/geneview/view/abstract/18840428	TNF-alpha and TGF-beta1 have a complementary relationship in fibrogenesis.	TGF-beta1|21803@10090	TNF-alpha|21926@10090	119596
PMID.dPMID11297541.s11.p0	http://www.ncbi.nlm.nih.gov/pubmed/11297541	http://colonet.informatik.hu-berlin.de/geneview/view/abstract/11297541	The results demonstrated that TNF-alpha and TGF-beta could independently stimulate the 5'-flanking 670-base pair promoter.	TGF-beta|7040@9606	TNF-alpha|7124@9606	116869
PMID.dPMID14688418.s12.p0	http://www.ncbi.nlm.nih.gov/pubmed/14688418	http://colonet.informatik.hu-berlin.de/geneview/view/abstract/14688418	TNF-alpha and TGF-beta1 have been implicated in the fibrogenic process.	TGF-beta1|7040@9606	TNF-alpha|7124@9606	1157
PMC.dPMC20700413.s102.p0	http://www.ncbi.nlm.nih.gov/pubmed/20700413	http://colonet.informatik.hu-berlin.de/geneview/view/abstract/20700413	The interrelation between TGF-beta and TNF-alpha expression was further tested in vitro in cultured rat proximal tubular cells (IRPTC) [].	TNF-alpha|24835@10116	TGF-beta|59086@10116	112533
PMID.dPMID2153423.s1.p0	http://www.ncbi.nlm.nih.gov/pubmed/2153423	http://colonet.informatik.hu-berlin.de/geneview/view/abstract/2153423	Synergy between transforming growth factor-beta and tumor necrosis factor-alpha in the induction of monocytic differentiation of human leukemic cell lines.	tumor necrosis factor-alpha|7124@9606	transforming growth factor-beta|7040@9606	110123
PMID.dPMID11834353.s7.p1	http://www.ncbi.nlm.nih.gov/pubmed/11834353	http://colonet.informatik.hu-berlin.de/geneview/view/abstract/11834353	We hypothesize that TGF-beta1, prevents bcl-2 cleavage and increased TNF-alpha production.	TNF-alpha|24835@10116	TGF-beta1|59086@10116	110027
Sentences between ICAM1 and TNF
PMID.dPMID17294835.s11.p0	http://www.ncbi.nlm.nih.gov/pubmed/17294835	http://colonet.informatik.hu-berlin.de/geneview/view/abstract/17294835	We conclude that TNF-alpha and ICAM-1 play important roles in I/R.	ICAM-1|25464@10116	TNF-alpha|24835@10116	13809
PMID.dPMID8102141.s1.p0	http://www.ncbi.nlm.nih.gov/pubmed/8102141	http://colonet.informatik.hu-berlin.de/geneview/view/abstract/8102141	Histamine and cis-urocanic acid augment tumor necrosis factor-alpha mediated induction of keratinocyte intercellular adhesion molecule-1 expression.	intercellular adhesion molecule-1|3383@9606	tumor necrosis factor-alpha|7124@9606	12427
PMID.dPMID9369372.s12.p0	http://www.ncbi.nlm.nih.gov/pubmed/9369372	http://colonet.informatik.hu-berlin.de/geneview/view/abstract/9369372	Our results suggest that 17beta-oestradiol, by inhibiting TNF-alpha production, limits the deleterious ICAM-1-mediated binding of leukocytes to injured myocardium and protects against myocardial ischaemia-reperfusion injury.	ICAM-1|25464@10116	TNF-alpha|24835@10116	117056
PMID.dPMID9521860.s1.p0	http://www.ncbi.nlm.nih.gov/pubmed/9521860	http://colonet.informatik.hu-berlin.de/geneview/view/abstract/9521860	TNF-alpha and 9-cis-retinoic acid synergistically induce ICAM-1 expression: evidence for interaction of retinoid receptors with NF-kappa B.	ICAM-1|3383@9606	TNF-alpha|7124@9606	113891
PMID.dPMID10407627.s8.p0	http://www.ncbi.nlm.nih.gov/pubmed/10407627	http://colonet.informatik.hu-berlin.de/geneview/view/abstract/10407627	Alternatively, endogenous TNF-alpha might upregulate M phi ICAM-1 expression even at very low concentrations.	ICAM-1|15894@10090	TNF-alpha|21926@10090	108477
PMID.dPMID1352532.s8.p0	http://www.ncbi.nlm.nih.gov/pubmed/1352532	http://colonet.informatik.hu-berlin.de/geneview/view/abstract/1352532	TNF-alpha alone induced only ICAM-1.	ICAM-1|3383@9606	TNF-alpha|7124@9606	107871
PMID.dPMID9274840.s1.p0	http://www.ncbi.nlm.nih.gov/pubmed/9274840	http://colonet.informatik.hu-berlin.de/geneview/view/abstract/9274840	Glomerular ICAM-1 expression related to circulating TNF-alpha in human glomerulonephritis.	TNF-alpha|7124@9606	ICAM-1|3383@9606	106504
PMID.dPMID9830008.s6.p0	http://www.ncbi.nlm.nih.gov/pubmed/9830008	http://colonet.informatik.hu-berlin.de/geneview/view/abstract/9830008	Unlike H2O2, the proinflammatory cytokine TNFalpha induced IL-8 and ICAM-1 in both cell types.	ICAM-1|3383@9606	TNFalpha|7124@9606	103027
PMID.dPMID7556590.s10.p0	http://www.ncbi.nlm.nih.gov/pubmed/7556590	http://colonet.informatik.hu-berlin.de/geneview/view/abstract/7556590	The association between ICAM-1 upregulation and endotoxin and TNF-alpha mRNA suggests a role for these mediators in the inflammatory process in alcoholic liver injury.	TNF-alpha|24835@10116	ICAM-1|25464@10116	101224
PMID.dPMID16714332.s12.p0	http://www.ncbi.nlm.nih.gov/pubmed/16714332	http://colonet.informatik.hu-berlin.de/geneview/view/abstract/16714332	We observed that TNF-alpha challenge resulted in increased ICAM-1 expression in endothelial cells freshly isolated from lungs.	ICAM-1|15894@10090	TNF-alpha|21926@10090	10067
Sentences between TNF and NFKB1
PMID.dPMID11259437.s11.p0	http://www.ncbi.nlm.nih.gov/pubmed/11259437	http://colonet.informatik.hu-berlin.de/geneview/view/abstract/11259437	Together, these results strongly suggest that NF-kappaB is involved in signal transduction of 1-->3-beta-glucans-induced TNF-alpha expression.	TNF-alpha|21926@10090	NF-kappaB|18033@10090	166121
PMID.dPMID11059688.s6.p0	http://www.ncbi.nlm.nih.gov/pubmed/11059688	http://colonet.informatik.hu-berlin.de/geneview/view/abstract/11059688	We demonstrate that both TNFalpha and adriamycin activate NFkappaB in hepatoma cells.	NFkappaB|4790@9606	TNFalpha|7124@9606	138993
PMID.dPMID14766535.s1.p0	http://www.ncbi.nlm.nih.gov/pubmed/14766535	http://colonet.informatik.hu-berlin.de/geneview/view/abstract/14766535	TNF-alpha-induced increase in intestinal epithelial tight junction permeability requires NF-kappa B activation.	NF-kappa B|4790@9606	TNF-alpha|7124@9606	123907
PMID.dPMID11831701.s9.p0	http://www.ncbi.nlm.nih.gov/pubmed/11831701	http://colonet.informatik.hu-berlin.de/geneview/view/abstract/11831701	Furthermore, it is suggested that protein kinases like PK-C are involved in the TNFalpha signal transduction pathway which leads to the activation of NF-kappaB and its binding to the HCMV IE enhancer in HL-60 cells.	NF-kappaB|4790@9606	TNFalpha|7124@9606	11705
PMID.dPMID19854828.s13.p0	http://www.ncbi.nlm.nih.gov/pubmed/19854828	http://colonet.informatik.hu-berlin.de/geneview/view/abstract/19854828	These results suggest that TNFalpha inhibits BMP signaling by interfering with the DNA binding of Smads through the activation of NF-kappaB.	NF-kappaB|18033@10090	TNFalpha|21926@10090	11208
PMID.dPMID12133965.s1.p0	http://www.ncbi.nlm.nih.gov/pubmed/12133965	http://colonet.informatik.hu-berlin.de/geneview/view/abstract/12133965	Mitogen-activated protein kinases and NF-kappa B are involved in TNF-alpha responses to group B streptococci.	TNF-alpha|7124@9606	NF-kappa B|4790@9606	110504
PMID.dPMID12135878.s10.p0	http://www.ncbi.nlm.nih.gov/pubmed/12135878	http://colonet.informatik.hu-berlin.de/geneview/view/abstract/12135878	TNFalpha induced IkappaB phosphorylation and NFkappaB activation.	NFkappaB|81736@10116	TNFalpha|24835@10116	110253
PMID.dPMID14563845.s1.p0	http://www.ncbi.nlm.nih.gov/pubmed/14563845	http://colonet.informatik.hu-berlin.de/geneview/view/abstract/14563845	Tumor necrosis factor-alpha activates NFkappaB to inhibit renin transcription by targeting cAMP-responsive element.	NFkappaB|18033@10090	Tumor necrosis factor-alpha|21926@10090	109996
PMID.dPMID14563845.s10.p0	http://www.ncbi.nlm.nih.gov/pubmed/14563845	http://colonet.informatik.hu-berlin.de/geneview/view/abstract/14563845	Our results strongly suggest that NFkappaB mediates the effect of TNFalpha on renin transcription targeting a CRE in the mouse renin promoter.	TNFalpha|21926@10090	NFkappaB|18033@10090	108793
PMID.dPMID11289659.s16.p0	http://www.ncbi.nlm.nih.gov/pubmed/11289659	http://colonet.informatik.hu-berlin.de/geneview/view/abstract/11289659	Neutrophils possess NFkappaB activity that is increased by stimulation with TNFalpha.	TNFalpha|7124@9606	NFkappaB|4790@9606	103422
Sentences between TNF and TNFRSF1A
PMID.dPMID11943805.s4.p0	http://www.ncbi.nlm.nih.gov/pubmed/11943805	http://colonet.informatik.hu-berlin.de/geneview/view/abstract/11943805	Here we present a novel interaction between TNFR subtypes and TNF-alpha in the brain.	TNF-alpha|21926@10090	TNFR|21937@10090	146843
PMID.dPMID12753742.s4.p0	http://www.ncbi.nlm.nih.gov/pubmed/12753742	http://colonet.informatik.hu-berlin.de/geneview/view/abstract/12753742	Here we show that upon TNFalpha binding, TNFR1 translocates to cholesterol- and sphingolipid-enriched membrane microdomains, termed lipid rafts, where it associates with the Ser/Thr kinase RIP and the adaptor proteins TRADD and TRAF2, forming a signaling complex.	TNFR1|7132@9606	TNFalpha|7124@9606	144703
PMID.dPMID20156456.s12.p0	http://www.ncbi.nlm.nih.gov/pubmed/20156456	http://colonet.informatik.hu-berlin.de/geneview/view/abstract/20156456	Our results suggest that HBx-induced NF-kappaB activation was mediated by direct interaction with TNFR1 and thereby induced TNF-alpha production.	TNF-alpha|21926@10090	TNFR1|7132@9606	138426
PMID.dPMID7743333.s5.p0	http://www.ncbi.nlm.nih.gov/pubmed/7743333	http://colonet.informatik.hu-berlin.de/geneview/view/abstract/7743333	In fatal meningococcal infections, TNFR shedding fails to pace TNF alpha production.	TNF alpha|7124@9606	TNFR|7132@9606	122568
PMID.dPMID10209503.s14.p0	http://www.ncbi.nlm.nih.gov/pubmed/10209503	http://colonet.informatik.hu-berlin.de/geneview/view/abstract/10209503	These results indicate that the interaction between TNF-alpha and TNF-RI alone generated a sufficient signal to activate a caspase II subfamily-dependent apoptosis in human cholangiocarcinoma cell lines.	TNF-RI|7132@9606	TNF-alpha|7124@9606	12042
PMID.dPMID18258792.s11.p0	http://www.ncbi.nlm.nih.gov/pubmed/18258792	http://colonet.informatik.hu-berlin.de/geneview/view/abstract/18258792	Our data are consistent with the hypothesis that TNF-alpha is involved in early TJ rearrangement and that its effects are mediated through TNFR-1.	TNFR|21937@10090	TNF-alpha|21926@10090	112672
PMID.dPMID15138204.s15.p0	http://www.ncbi.nlm.nih.gov/pubmed/15138204	http://colonet.informatik.hu-berlin.de/geneview/view/abstract/15138204	TNF-alpha, acting via TNF-R1, is involved in indomethacin induced gastric damage and granulocyte infiltration.	TNF-R1|21937@10090	TNF-alpha|21926@10090	11199
PMID.dPMID15614439.s10.p0	http://www.ncbi.nlm.nih.gov/pubmed/15614439	http://colonet.informatik.hu-berlin.de/geneview/view/abstract/15614439	Thus we conclude that TNFalpha, acting through TNFRI, appears important for the protective effects of hyperoxia.	TNFRI|21937@10090	TNFalpha|21926@10090	110695
PMID.dPMID10975909.s10.p0	http://www.ncbi.nlm.nih.gov/pubmed/10975909	http://colonet.informatik.hu-berlin.de/geneview/view/abstract/10975909	In vitro astrocytes constitutively express TNF-R1 and TNF-alpha stimulation induces expression of NOS-2.	TNF-alpha|7124@9606	TNF-R1|7132@9606	108683
PMID.dPMID18289527.s9.p0	http://www.ncbi.nlm.nih.gov/pubmed/18289527	http://colonet.informatik.hu-berlin.de/geneview/view/abstract/18289527	Thus, our results indicate that ectodomain shedding of TNF-R1 induced by protein synthesis inhibitors regulates TNF-alpha-mediated activation of NF-kappaB and caspase-8.	TNF-alpha|7124@9606	TNF-R1|7132@9606	10685
Sentences between TNF and NOS2
PMID.dPMID17166679.s8.p0	http://www.ncbi.nlm.nih.gov/pubmed/17166679	http://colonet.informatik.hu-berlin.de/geneview/view/abstract/17166679	These results suggest that KBV has anti-inflammatory properties that inhibit iNOS and TNF-alpha expression.	TNF-alpha|21926@10090	iNOS|18126@10090	135107
PMID.dPMID17567463.s7.p0	http://www.ncbi.nlm.nih.gov/pubmed/17567463	http://colonet.informatik.hu-berlin.de/geneview/view/abstract/17567463	The TNF-alpha and Jo2 induced iNOS through NF-kappaB.	iNOS|18126@10090	TNF-alpha|21926@10090	134328
PMID.dPMID16133968.s4.p0	http://www.ncbi.nlm.nih.gov/pubmed/16133968	http://colonet.informatik.hu-berlin.de/geneview/view/abstract/16133968	We evaluated the relationship between TNF-alpha and iNOS expression in indomethacin-induced jejunoileitis in male Sprague-Dawley rats.	iNOS|24599@10116	TNF-alpha|24835@10116	129546
PMID.dPMID9803463.s1.p0	http://www.ncbi.nlm.nih.gov/pubmed/9803463	http://colonet.informatik.hu-berlin.de/geneview/view/abstract/9803463	Genital mycoplasmas stimulate tumor necrosis factor-alpha and inducible nitric oxide synthase production from a murine macrophage cell line.	inducible nitric oxide synthase|18126@10090	tumor necrosis factor-alpha|21926@10090	121825
PMID.dPMID12527339.s9.p0	http://www.ncbi.nlm.nih.gov/pubmed/12527339	http://colonet.informatik.hu-berlin.de/geneview/view/abstract/12527339	Collectively, these results strongly suggest that THI 52 suppresses both TNF-alpha and iNOS gene expression by inhibiting NF-kappaB.	iNOS|18126@10090	TNF-alpha|24835@10116	12058
PMID.dPMID19802525.s1.p0	http://www.ncbi.nlm.nih.gov/pubmed/19802525	http://colonet.informatik.hu-berlin.de/geneview/view/abstract/19802525	TNF-alpha modulates iNOS expression in an experimental rat model of indomethacin-induced jejunoileitis.	iNOS|24599@10116	TNF-alpha|24835@10116	119005
PMID.dPMID16981459.s14.p0	http://www.ncbi.nlm.nih.gov/pubmed/16981459	http://colonet.informatik.hu-berlin.de/geneview/view/abstract/16981459	HSP 70, iNOS, TNF-alpha and IL-1beta are involved in contusion cerebral edema.	TNF-alpha|24835@10116	iNOS|24599@10116	112863
PMID.dPMID16133968.s12.p0	http://www.ncbi.nlm.nih.gov/pubmed/16133968	http://colonet.informatik.hu-berlin.de/geneview/view/abstract/16133968	The downregulation of nitrate/nitrite by these inhibitors suggests that TNF-alpha modulates iNOS expression.	iNOS|24599@10116	TNF-alpha|24835@10116	107623
PMID.dPMID17588258.s6.p0	http://www.ncbi.nlm.nih.gov/pubmed/17588258	http://colonet.informatik.hu-berlin.de/geneview/view/abstract/17588258	Furthermore, TNF-alpha and LPS significantly induced NOS2 expression.	NOS2|18126@10090	TNF-alpha|21926@10090	0.979362
PMID.dPMID20135642.s12.p0	http://www.ncbi.nlm.nih.gov/pubmed/20135642	http://colonet.informatik.hu-berlin.de/geneview/view/abstract/20135642	Our results suggest that TNF-alpha increased iNOS expression and NO production in myoblasts via the ILK/Akt/mTOR and NF-kappaB signaling pathway.	iNOS|18126@10090	TNF-alpha|21926@10090	0.968047
Sentences between TNF and LTA
PMID.dPMID20092780.s15.p0	http://www.ncbi.nlm.nih.gov/pubmed/20092780	http://colonet.informatik.hu-berlin.de/geneview/view/abstract/20092780	The TNFR can regulate the TNF-alpha and the TNF-beta in dynamic balancing.	TNF-beta|25008@10116	TNF-alpha|24835@10116	128577
PMC.dPMC19018300.s41.p0	http://www.ncbi.nlm.nih.gov/pubmed/19018300	http://colonet.informatik.hu-berlin.de/geneview/view/abstract/19018300	TNF-alpha and TNF-beta have both been previously associated with migraine.	TNF-beta|4049@9606	TNF-alpha|7124@9606	118528
PMID.dPMID14593215.s11.p0	http://www.ncbi.nlm.nih.gov/pubmed/14593215	http://colonet.informatik.hu-berlin.de/geneview/view/abstract/14593215	These results show that the TNF-alpha -308 and TNF-beta +252 locus plays an important role in the etiopathogenesis of CI.	TNF-beta|4049@9606	TNF-alpha|7124@9606	111803
PMID.dPMID2788794.s10.p0	http://www.ncbi.nlm.nih.gov/pubmed/2788794	http://colonet.informatik.hu-berlin.de/geneview/view/abstract/2788794	These results indicate that the major DIF activity derived from MT-2 is LT.	LT|16992@10090	DIF|21926@10090	108861
PMID.dPMID10600011.s1.p0	http://www.ncbi.nlm.nih.gov/pubmed/10600011	http://colonet.informatik.hu-berlin.de/geneview/view/abstract/10600011	TNF-alpha and TNF-beta gene polymorphisms in systemic sclerosis.	TNF-beta|4049@9606	TNF-alpha|7124@9606	106848
PMID.dPMID1756230.s3.p0	http://www.ncbi.nlm.nih.gov/pubmed/1756230	http://colonet.informatik.hu-berlin.de/geneview/view/abstract/1756230	TNF-alpha and TNF-beta are both involved in inflammation which regulates homeostasis in adults.	TNF-beta|4049@9606	TNF-alpha|21926@10090	106569
PMID.dPMID10199335.s1.p0	http://www.ncbi.nlm.nih.gov/pubmed/10199335	http://colonet.informatik.hu-berlin.de/geneview/view/abstract/10199335	TNFA and TNFB polymorphisms in myasthenia gravis.	TNFB|4049@9606	TNFA|7124@9606	105901
PMID.dPMID2200173.s16.p0	http://www.ncbi.nlm.nih.gov/pubmed/2200173	http://colonet.informatik.hu-berlin.de/geneview/view/abstract/2200173	These data suggest that TNF-alpha and LT may play a role in the pathogenesis of acute allograft rejection.	LT|25008@10116	TNF-alpha|24835@10116	104204
PMID.dPMID14593215.s1.p0	http://www.ncbi.nlm.nih.gov/pubmed/14593215	http://colonet.informatik.hu-berlin.de/geneview/view/abstract/14593215	TNF-alpha and TNF-beta gene polymorphisms in cerebral infarction.	TNF-beta|4049@9606	TNF-alpha|7124@9606	10251
PMC.dPMC19018300.s109.p0	http://www.ncbi.nlm.nih.gov/pubmed/19018300	http://colonet.informatik.hu-berlin.de/geneview/view/abstract/19018300	TNF-alpha and TNF-beta have both been previously associated with migraine [,].	TNF-beta|4049@9606	TNF-alpha|7124@9606	0.997829
Sentences between LEP and TNF
PMID.dPMID10490793.s17.p0	http://www.ncbi.nlm.nih.gov/pubmed/10490793	http://colonet.informatik.hu-berlin.de/geneview/view/abstract/10490793	Therefore, TNF-alpha appears to induce a dissociation between adipocyte glucose metabolism and leptin production.	leptin|25608@10116	TNF-alpha|24835@10116	1334
PMID.dPMID16635406.s17.p0	http://www.ncbi.nlm.nih.gov/pubmed/16635406	http://colonet.informatik.hu-berlin.de/geneview/view/abstract/16635406	There was no significant correlation between leptin and TNF-alpha in any group.	TNF-alpha|7124@9606	leptin|3952@9606	127526
PMID.dPMID19662887.s4.p1	http://www.ncbi.nlm.nih.gov/pubmed/19662887	http://colonet.informatik.hu-berlin.de/geneview/view/abstract/19662887	Such hormones are adipocytokines--leptin, adiponectin, TNF-alpha, IL-6, resistin and visfatin.	TNF-alpha|7124@9606	leptin|3952@9606	124771
PMID.dPMID10510538.s12.p0	http://www.ncbi.nlm.nih.gov/pubmed/10510538	http://colonet.informatik.hu-berlin.de/geneview/view/abstract/10510538	TNF-alpha and leptin plasma levels.	leptin|3952@9606	TNF-alpha|7124@9606	11902
PMID.dPMID16378116.s15.p0	http://www.ncbi.nlm.nih.gov/pubmed/16378116	http://colonet.informatik.hu-berlin.de/geneview/view/abstract/16378116	(3) There was no significant correlation between leptin and TNF-alpha in any group.	TNF-alpha|7124@9606	leptin|3952@9606	118965
PMID.dPMID11888838.s14.p0	http://www.ncbi.nlm.nih.gov/pubmed/11888838	http://colonet.informatik.hu-berlin.de/geneview/view/abstract/11888838	The independent association between plasma TNFalpha receptors and leptin levels in obese patients is consistent with the hypothesis that these proteins could be involved in the same pathway that regulates body adiposity.	leptin|3952@9606	TNFalpha|7124@9606	117517
PMID.dPMID10687854.s5.p0	http://www.ncbi.nlm.nih.gov/pubmed/10687854	http://colonet.informatik.hu-berlin.de/geneview/view/abstract/10687854	TNF-alpha blocked leptin synthesis during differentiation.	leptin|3952@9606	TNF-alpha|7124@9606	116828
PMID.dPMID10340812.s1.p0	http://www.ncbi.nlm.nih.gov/pubmed/10340812	http://colonet.informatik.hu-berlin.de/geneview/view/abstract/10340812	Relationship between plasma leptin levels and the tumor necrosis factor-alpha system in obese subjects.	tumor necrosis factor-alpha|7124@9606	leptin|3952@9606	116269
PMID.dPMID10340812.s20.p0	http://www.ncbi.nlm.nih.gov/pubmed/10340812	http://colonet.informatik.hu-berlin.de/geneview/view/abstract/10340812	Our results are consistent with the hypothesis that the TNFalpha system could be involved in the regulation of plasma leptin concentrations in obese subjects.	leptin|3952@9606	TNFalpha|7124@9606	112843
PMID.dPMID16249288.s16.p0	http://www.ncbi.nlm.nih.gov/pubmed/16249288	http://colonet.informatik.hu-berlin.de/geneview/view/abstract/16249288	We propose that the generation of placental lipid mediators through TNF-alpha and leptin stimulation represents a key mechanism to favor excess fetal fat accretion.	leptin|3952@9606	TNF-alpha|7124@9606	10152
Sentences between TNF and MAPK8
PMID.dPMID16516830.s3.p0	http://www.ncbi.nlm.nih.gov/pubmed/16516830	http://colonet.informatik.hu-berlin.de/geneview/view/abstract/16516830	The intricate interplay between NF-kappaB and JNK determines TNF-alpha cytotoxicity.	TNF-alpha|21926@10090	JNK|26419@10090	159188
PMID.dPMID19043087.s1.p1	http://www.ncbi.nlm.nih.gov/pubmed/19043087	http://colonet.informatik.hu-berlin.de/geneview/view/abstract/19043087	JNK1/c-fos inhibits cardiomyocyte TNF-alpha expression via a negative crosstalk with ERK and p38 MAPK in endotoxaemia.	TNF-alpha|21926@10090	JNK1|26419@10090	126374
PMID.dPMID15304089.s11.p0	http://www.ncbi.nlm.nih.gov/pubmed/15304089	http://colonet.informatik.hu-berlin.de/geneview/view/abstract/15304089	Both p38 MAPK and JNK participated to TNF-alpha production induced by DNCB.	TNF-alpha|7124@9606	JNK|5599@9606	108254
PMID.dPMID11713531.s8.p0	http://www.ncbi.nlm.nih.gov/pubmed/11713531	http://colonet.informatik.hu-berlin.de/geneview/view/abstract/11713531	It is unknown whether any crosstalk occurs between IKK and JNK, and, if so, how it affects TNF-alpha-induced apoptosis.	TNF-alpha|21926@10090	JNK|26419@10090	0.989643
PMID.dPMID19918265.s11.p2	http://www.ncbi.nlm.nih.gov/pubmed/19918265	http://colonet.informatik.hu-berlin.de/geneview/view/abstract/19918265	Hence, our data show that the direct interaction between TRAF2 and MLK3 is required for TNF-alpha-induced activation of MLK3 and its downstream target, JNK.	JNK|26419@10090	TNF-alpha|21926@10090	0.949379
PMC.dPMC21492465.s22.p2	http://www.ncbi.nlm.nih.gov/pubmed/21492465	http://colonet.informatik.hu-berlin.de/geneview/view/abstract/21492465	TRAF1 and TRAF2 form a heterodimeric complex, which is required for TNF-alpha-mediated activation of MAPK8/JNK and NF-kappaB.	JNK|5599@9606	TNF-alpha|7124@9606	0.923423
PMID.dPMID16469705.s6.p0	http://www.ncbi.nlm.nih.gov/pubmed/16469705	http://colonet.informatik.hu-berlin.de/geneview/view/abstract/16469705	Here we show that TNFalpha-mediated JNK activation accelerates turnover of the NF-kappaB-induced antiapoptotic protein c-FLIP, an inhibitor of caspase-8.	JNK|26419@10090	TNFalpha|21926@10090	0.915185
PMID.dPMID16150837.s12.p0	http://www.ncbi.nlm.nih.gov/pubmed/16150837	http://colonet.informatik.hu-berlin.de/geneview/view/abstract/16150837	Activated JNK and TNF-alpha increased in PC- but were diminished in PC+500 animals.	TNF-alpha|24835@10116	JNK|116554@10116	0.900931
PMID.dPMID9461593.s1.p0	http://www.ncbi.nlm.nih.gov/pubmed/9461593	http://colonet.informatik.hu-berlin.de/geneview/view/abstract/9461593	Correlation between sustained c-Jun N-terminal protein kinase activation and apoptosis induced by tumor necrosis factor-alpha in rat mesangial cells.	tumor necrosis factor-alpha|24835@10116	c-Jun N-terminal protein kinase|116554@10116	0.900046
PMID.dPMID15766528.s1.p0	http://www.ncbi.nlm.nih.gov/pubmed/15766528	http://colonet.informatik.hu-berlin.de/geneview/view/abstract/15766528	Reactive oxygen species promote TNFalpha-induced death and sustained JNK activation by inhibiting MAP kinase phosphatases.	JNK|26419@10090	TNFalpha|21926@10090	0.898353
Sentences between IL1A and TNF
PMID.dPMID9453616.s13.p0	http://www.ncbi.nlm.nih.gov/pubmed/9453616	http://colonet.informatik.hu-berlin.de/geneview/view/abstract/9453616	IL-1alpha and TNF-alpha alone upregulate IL-6 production in a dose- and time-dependent fashion.	TNF-alpha|7124@9606	IL-1alpha|3552@9606	118034
PMID.dPMID14708617.s8.p0	http://www.ncbi.nlm.nih.gov/pubmed/14708617	http://colonet.informatik.hu-berlin.de/geneview/view/abstract/14708617	IL-1alpha and TNF-alpha immunohistochemical protein staining increased with iontophoresis at low calcium.	TNF-alpha|21926@10090	IL-1alpha|16175@10090	117036
PMID.dPMID12930304.s1.p0	http://www.ncbi.nlm.nih.gov/pubmed/12930304	http://colonet.informatik.hu-berlin.de/geneview/view/abstract/12930304	Urokinase plasminogen activator mRNA is induced by IL-1alpha and TNF-alpha in in vitro acantholysis.	TNF-alpha|7124@9606	IL-1alpha|3552@9606	113442
PMID.dPMID11943808.s9.p0	http://www.ncbi.nlm.nih.gov/pubmed/11943808	http://colonet.informatik.hu-berlin.de/geneview/view/abstract/11943808	Observations suggest that TNFalpha and IL-1alpha are the first cytokines with protein production that is upregulated during rapid-WD.	IL-1alpha|16175@10090	TNFalpha|21926@10090	113417
PMID.dPMID12356823.s1.p0	http://www.ncbi.nlm.nih.gov/pubmed/12356823	http://colonet.informatik.hu-berlin.de/geneview/view/abstract/12356823	Suppression of the TNFalpha-induced increase in IL-1alpha expression by hypochlorite in human corneal epithelial cells.	IL-1alpha|3552@9606	TNFalpha|7124@9606	111195
PMID.dPMID10515840.s8.p0	http://www.ncbi.nlm.nih.gov/pubmed/10515840	http://colonet.informatik.hu-berlin.de/geneview/view/abstract/10515840	These data suggest that TNF-alpha and IL-1alpha may play a role in cutaneous host defense by impeding streptococcal adherence and decreasing its ability to form a nidus of infection in the skin.	IL-1alpha|3552@9606	TNF-alpha|7124@9606	107188
PMID.dPMID11079623.s10.p0	http://www.ncbi.nlm.nih.gov/pubmed/11079623	http://colonet.informatik.hu-berlin.de/geneview/view/abstract/11079623	The whole process may play an important role in the immunopathogenesis of syphilis and it is likely that TNF-alpha and IL-1alpha are involved.	IL-1alpha|3552@9606	TNF-alpha|7124@9606	104918
PMID.dPMID12237882.s8.p0	http://www.ncbi.nlm.nih.gov/pubmed/12237882	http://colonet.informatik.hu-berlin.de/geneview/view/abstract/12237882	IL-1alpha stimulated TNFalpha-induced lacunar resorption two- to four-fold.	TNFalpha|7124@9606	IL-1alpha|3552@9606	104632
PMID.dPMID10634607.s10.p0	http://www.ncbi.nlm.nih.gov/pubmed/10634607	http://colonet.informatik.hu-berlin.de/geneview/view/abstract/10634607	IL-1alpha and TNF-alpha are upregulated in corneas in mice experiencing recurrent HSK.	TNF-alpha|21926@10090	IL-1alpha|16175@10090	103902
PMID.dPMID10082594.s7.p0	http://www.ncbi.nlm.nih.gov/pubmed/10082594	http://colonet.informatik.hu-berlin.de/geneview/view/abstract/10082594	We previously had shown that IL-1alpha and TNF-alpha are expressed in PV in vivo and in vitro.	TNF-alpha|7124@9606	IL-1alpha|3552@9606	101132
Sentences between TNF and MMP9
PMID.dPMID18222174.s7.p0	http://www.ncbi.nlm.nih.gov/pubmed/18222174	http://colonet.informatik.hu-berlin.de/geneview/view/abstract/18222174	TNF-alpha induced MMP-9 expression by NF-kappaB-dependent pathway.	MMP-9|4318@9606	TNF-alpha|7124@9606	155562
PMID.dPMID17897957.s14.p0	http://www.ncbi.nlm.nih.gov/pubmed/17897957	http://colonet.informatik.hu-berlin.de/geneview/view/abstract/17897957	We conclude that TAK1-mediated pathways are involved in TNF-alpha-induced MMP-9 production in skeletal muscle cells.	MMP-9|17395@10090	TNF-alpha|21926@10090	134703
PMID.dPMID11073115.s1.p0	http://www.ncbi.nlm.nih.gov/pubmed/11073115	http://colonet.informatik.hu-berlin.de/geneview/view/abstract/11073115	Fibronectin-bound TNF-alpha stimulates monocyte matrix metalloproteinase-9 expression and regulates chemotaxis.	matrix metalloproteinase-9|4318@9606	TNF-alpha|7124@9606	130765
PMID.dPMID17988825.s7.p0	http://www.ncbi.nlm.nih.gov/pubmed/17988825	http://colonet.informatik.hu-berlin.de/geneview/view/abstract/17988825	TNF-alpha induced the MMP-9 expression in HepG2 cells.	MMP-9|4318@9606	TNF-alpha|7124@9606	110965
PMID.dPMID16720051.s5.p0	http://www.ncbi.nlm.nih.gov/pubmed/16720051	http://colonet.informatik.hu-berlin.de/geneview/view/abstract/16720051	Endogenous TNF-alpha stimulates MMP-9 gene transcription in monocytes through NF-kappaB activation.	MMP-9|4318@9606	TNF-alpha|7124@9606	110892
PMID.dPMID22053594.s10.p0	http://www.ncbi.nlm.nih.gov/pubmed/22053594	http://colonet.informatik.hu-berlin.de/geneview/view/abstract/22053594	This result suggested that there might be an association between TNF-alpha and MMP-9 production that could account for the specific virulent nature of Nonthaburi strains.	MMP-9|4318@9606	TNF-alpha|7124@9606	110242
PMID.dPMID10550743.s1.p0	http://www.ncbi.nlm.nih.gov/pubmed/10550743	http://colonet.informatik.hu-berlin.de/geneview/view/abstract/10550743	Human eosinophils release matrix metalloproteinase-9 on stimulation with TNF-alpha.	TNF-alpha|7124@9606	matrix metalloproteinase-9|4318@9606	109132
PMID.dPMID18801463.s6.p0	http://www.ncbi.nlm.nih.gov/pubmed/18801463	http://colonet.informatik.hu-berlin.de/geneview/view/abstract/18801463	Our results also demonstrated that TNF-alpha stimulates MMP-9 expression via the p38 MAP kinase signaling pathway in 5637 cells.	MMP-9|4318@9606	TNF-alpha|7124@9606	103919
PMID.dPMID11704541.s4.p0	http://www.ncbi.nlm.nih.gov/pubmed/11704541	http://colonet.informatik.hu-berlin.de/geneview/view/abstract/11704541	We demonstrated that TNF-alpha induced MMP-9 at both the protein and mRNA levels in human bronchial epithelial cells and that interleukin-1 beta did not.	MMP-9|4318@9606	TNF-alpha|7124@9606	102028
PMID.dPMID10943866.s14.p0	http://www.ncbi.nlm.nih.gov/pubmed/10943866	http://colonet.informatik.hu-berlin.de/geneview/view/abstract/10943866	These observations indicate that suppression of TNFalpha-induced MMP-9 production by the introduction of srIkappaBalpha cDNA corrected the aberrant in vitro morphogenesis of acinar cells grown on type IV collagen.	MMP-9|4318@9606	TNFalpha|7124@9606	0.968517
Sentences between TNF and CCL2
PMID.dPMID16436659.s10.p0	http://www.ncbi.nlm.nih.gov/pubmed/16436659	http://colonet.informatik.hu-berlin.de/geneview/view/abstract/16436659	The current study demonstrates that TNF-alpha and IL-1beta enhance MCP-1 in first trimester decidua.	MCP-1|6347@9606	TNF-alpha|7124@9606	112851
PMID.dPMID8587246.s13.p0	http://www.ncbi.nlm.nih.gov/pubmed/8587246	http://colonet.informatik.hu-berlin.de/geneview/view/abstract/8587246	MCP-1 protein was detected in untreated GEN and increased by exposure to TNF-alpha.	TNF-alpha|7124@9606	MCP-1|6347@9606	105819
PMID.dPMID17221363.s1.p0	http://www.ncbi.nlm.nih.gov/pubmed/17221363	http://colonet.informatik.hu-berlin.de/geneview/view/abstract/17221363	Elevated plasma levels of interleukin 1 beta, tumour necrosis factor alpha and monocyte chemotactic protein 1 are associated with pregnancy toxaemia in ewes.	monocyte chemotactic protein 1|6347@9606	tumour necrosis factor alpha|7124@9606	0.915228
PMID.dPMID19458908.s9.p0	http://www.ncbi.nlm.nih.gov/pubmed/19458908	http://colonet.informatik.hu-berlin.de/geneview/view/abstract/19458908	TNF-alpha induced MCP-1, RANTES, and granzyme B production in cultured synovial cells from RA patients.	MCP-1|6347@9606	TNF-alpha|7124@9606	0.8969
PMID.dPMID11016686.s8.p1	http://www.ncbi.nlm.nih.gov/pubmed/11016686	http://colonet.informatik.hu-berlin.de/geneview/view/abstract/11016686	Together, TNF-alpha and IFN-gamma acted synergistically to increase MCP-1 production.	MCP-1|6347@9606	TNF-alpha|7124@9606	0.894604
PMID.dPMID19910630.s10.p0	http://www.ncbi.nlm.nih.gov/pubmed/19910630	http://colonet.informatik.hu-berlin.de/geneview/view/abstract/19910630	MCP-1 expression was doubled upon TNF-alpha exposure.	TNF-alpha|7124@9606	MCP-1|6347@9606	0.852241
PMID.dPMID10690939.s12.p0	http://www.ncbi.nlm.nih.gov/pubmed/10690939	http://colonet.informatik.hu-berlin.de/geneview/view/abstract/10690939	We demonstrated that alpha-tocopherol also inhibited TNF-alpha-induced MCP-1 production in HMCs, although its effects were not as strong as troglitazone.	MCP-1|6347@9606	TNF-alpha|7124@9606	0.851782
PMID.dPMID14736953.s15.p0	http://www.ncbi.nlm.nih.gov/pubmed/14736953	http://colonet.informatik.hu-berlin.de/geneview/view/abstract/14736953	These data demonstrate that while TNF-alpha induced MCP-1 production is mediated by the cooperative action of NF-kappa B and AP-1 in HGEC, dexamethasone represses TNF-alpha induced MCP-1 production via suppression of AP-1 binding activity.	MCP-1|6347@9606	TNF-alpha|7124@9606	0.843755
PMID.dPMID9407069.s12.p3	http://www.ncbi.nlm.nih.gov/pubmed/9407069	http://colonet.informatik.hu-berlin.de/geneview/view/abstract/9407069	While TNFalpha induced both RANTES and MCP-1, H2O2 induced only MCP-1.	MCP-1|6347@9606	TNFalpha|7124@9606	0.824538
PMID.dPMID9620670.s7.p0	http://www.ncbi.nlm.nih.gov/pubmed/9620670	http://colonet.informatik.hu-berlin.de/geneview/view/abstract/9620670	Hypoxia down-regulated TNF-alpha-induced MCP-1 mRNA and protein production by ovarian cancer cells.	MCP-1|6347@9606	TNF-alpha|7124@9606	0.814283
Sentences between FAS and TNF
PMID.dPMID18946736.s8.p0	http://www.ncbi.nlm.nih.gov/pubmed/18946736	http://colonet.informatik.hu-berlin.de/geneview/view/abstract/18946736	Our data provide evidence for a direct link between TNFalpha and Fas/FasL in mediating hepatocyte apoptosis.	Fas|14102@10090	TNFalpha|21926@10090	160928
PMID.dPMID19062280.s5.p0	http://www.ncbi.nlm.nih.gov/pubmed/19062280	http://colonet.informatik.hu-berlin.de/geneview/view/abstract/19062280	Here we report that Fas and TNF-alpha receptor stimulation activates human NDR1/2 by promoting phosphorylation at the hydrophobic motif (Thr444/442).	TNF-alpha|7124@9606	Fas|355@9606	119318
PMID.dPMID15189947.s12.p1	http://www.ncbi.nlm.nih.gov/pubmed/15189947	http://colonet.informatik.hu-berlin.de/geneview/view/abstract/15189947	These results suggest that the TNF-alpha/TNFRI and FasL/Fas systems may be involved in the pathogenesis of sepsis.	Fas|355@9606	TNF-alpha|7124@9606	109865
PMID.dPMID17605860.s5.p0	http://www.ncbi.nlm.nih.gov/pubmed/17605860	http://colonet.informatik.hu-berlin.de/geneview/view/abstract/17605860	Apoptosis induced by IgM type anti-Fas and TNF-alpha was detected by API method.	TNF-alpha|7124@9606	Fas|355@9606	106937
PMID.dPMID9558119.s1.p0	http://www.ncbi.nlm.nih.gov/pubmed/9558119	http://colonet.informatik.hu-berlin.de/geneview/view/abstract/9558119	Disparate roles for TNF-alpha and Fas ligand in concanavalin A-induced hepatitis.	Fas|14102@10090	TNF-alpha|21926@10090	0.984647
PMC.dPMC19401142.s164.p0	http://www.ncbi.nlm.nih.gov/pubmed/19401142	http://colonet.informatik.hu-berlin.de/geneview/view/abstract/19401142	To our knowledge, this is the first time that this relationship has been reported, although a known association exists between Fas and TNF-alpha with glial and neuronal vacuolisation in other brainstem neurodegenerative models [].	TNF-alpha|7124@9606	Fas|355@9606	0.954636
PMID.dPMID10722700.s10.p0	http://www.ncbi.nlm.nih.gov/pubmed/10722700	http://colonet.informatik.hu-berlin.de/geneview/view/abstract/10722700	Anti-Fas antibody, like TNF-alpha also activated serine proteases that contributed to cell death.	TNF-alpha|7124@9606	Fas|355@9606	0.945727
PMID.dPMID19932975.s10.p0	http://www.ncbi.nlm.nih.gov/pubmed/19932975	http://colonet.informatik.hu-berlin.de/geneview/view/abstract/19932975	Further, simvastatin increased LSEC-apoptosis induced by Fas and TNF-alpha.	TNF-alpha|21926@10090	Fas|14102@10090	0.9021
PMID.dPMID11518677.s4.p0	http://www.ncbi.nlm.nih.gov/pubmed/11518677	http://colonet.informatik.hu-berlin.de/geneview/view/abstract/11518677	Nitric oxide (NO) protects from apoptosis induced by Fas and TNF-alpha.	TNF-alpha|7124@9606	Fas|355@9606	0.852111
PMID.dPMID11266388.s12.p0	http://www.ncbi.nlm.nih.gov/pubmed/11266388	http://colonet.informatik.hu-berlin.de/geneview/view/abstract/11266388	NO protects hepatocytes from TNF-alpha- and Fas-mediated apoptosis.	Fas|14102@10090	TNF-alpha|21926@10090	0.827901
Sentences between TNF and VEGFA
PMID.dPMID19233472.s11.p0	http://www.ncbi.nlm.nih.gov/pubmed/19233472	http://colonet.informatik.hu-berlin.de/geneview/view/abstract/19233472	The interval between VEGF and TNF-alpha is 12.31Mb.	TNF-alpha|7124@9606	VEGF|7422@9606	155353
PMID.dPMID18683887.s4.p0	http://www.ncbi.nlm.nih.gov/pubmed/18683887	http://colonet.informatik.hu-berlin.de/geneview/view/abstract/18683887	TNF-alpha induced VEGF, resulting in neovascularization of disc tissues in a model of HD.	VEGF|7422@9606	TNF-alpha|7124@9606	120879
PMID.dPMID17725275.s11.p0	http://www.ncbi.nlm.nih.gov/pubmed/17725275	http://colonet.informatik.hu-berlin.de/geneview/view/abstract/17725275	Our results suggest that VEGF, TNF-alpha and IL-12 are engaged in neoangiogenesis regulation of diabetic retinopathy children.	TNF-alpha|7124@9606	VEGF|7422@9606	119163
PMID.dPMID18036640.s15.p0	http://www.ncbi.nlm.nih.gov/pubmed/18036640	http://colonet.informatik.hu-berlin.de/geneview/view/abstract/18036640	VEGF and TNFalpha ascites levels are associated with prognosis in advanced ovarian cancer.	TNFalpha|7124@9606	VEGF|7422@9606	118018
PMID.dPMID15781283.s9.p0	http://www.ncbi.nlm.nih.gov/pubmed/15781283	http://colonet.informatik.hu-berlin.de/geneview/view/abstract/15781283	TNF-alpha and INF-gamma did not increase VEGF concentration.	VEGF|7422@9606	TNF-alpha|7124@9606	11441
PMID.dPMID16040218.s1.p0	http://www.ncbi.nlm.nih.gov/pubmed/16040218	http://colonet.informatik.hu-berlin.de/geneview/view/abstract/16040218	TNF-alpha and endotoxin increase hypoxia-induced VEGF production by cultured human nasal fibroblasts in synergistic fashion.	VEGF|7422@9606	TNF-alpha|7124@9606	114352
PMID.dPMID20429787.s16.p0	http://www.ncbi.nlm.nih.gov/pubmed/20429787	http://colonet.informatik.hu-berlin.de/geneview/view/abstract/20429787	TNF-alpha released from papain-treated lung cells induces MSC to secret VEGF-A.	VEGF-A|83785@10116	TNF-alpha|24835@10116	109121
PMID.dPMID10477396.s13.p0	http://www.ncbi.nlm.nih.gov/pubmed/10477396	http://colonet.informatik.hu-berlin.de/geneview/view/abstract/10477396	The data also suggest that TNF-alpha via protein kinase C modulates the production of VEGF.	VEGF|7422@9606	TNF-alpha|7124@9606	105428
PMID.dPMID17854531.s8.p0	http://www.ncbi.nlm.nih.gov/pubmed/17854531	http://colonet.informatik.hu-berlin.de/geneview/view/abstract/17854531	No relationship was found between VEGF and TNFalpha concentrations and ICSI outcome.	TNFalpha|7124@9606	VEGF|7422@9606	105354
PMID.dPMID18683887.s9.p0	http://www.ncbi.nlm.nih.gov/pubmed/18683887	http://colonet.informatik.hu-berlin.de/geneview/view/abstract/18683887	Thus, TNF-alpha induced VEGF expression in disc cells primarily through the NF-kappaB pathway.	VEGF|22339@10090	TNF-alpha|21926@10090	102347
Sentences between TNF and VCAM1
PMID.dPMID10820282.s13.p0	http://www.ncbi.nlm.nih.gov/pubmed/10820282	http://colonet.informatik.hu-berlin.de/geneview/view/abstract/10820282	These results indicate that NF-kappa B mediates TNF-alpha-induced VCAM-1 expression on mFLS.	VCAM-1|22329@10090	TNF-alpha|21926@10090	116497
PMID.dPMID7529998.s6.p0	http://www.ncbi.nlm.nih.gov/pubmed/7529998	http://colonet.informatik.hu-berlin.de/geneview/view/abstract/7529998	Here, we demonstrate that TNF-alpha and IL-1 beta transiently induced VCAM-1 mRNA expression in a time dependent manner.	VCAM-1|25361@10116	TNF-alpha|24835@10116	108438
PMID.dPMID16934424.s3.p0	http://www.ncbi.nlm.nih.gov/pubmed/16934424	http://colonet.informatik.hu-berlin.de/geneview/view/abstract/16934424	Lung and synovial fibroblasts produce VCAM-1 in response to TNF-alpha.	TNF-alpha|7124@9606	VCAM-1|7412@9606	105476
PMID.dPMID17434475.s11.p0	http://www.ncbi.nlm.nih.gov/pubmed/17434475	http://colonet.informatik.hu-berlin.de/geneview/view/abstract/17434475	The result of the enzyme immunoassay demonstrated that Gypenoside XLIX inhibited TNF-alpha-induced increase in cell surface VCAM-1 protein levels in HUVECs.	VCAM-1|7412@9606	TNF-alpha|7124@9606	103121
PMID.dPMID7678355.s12.p0	http://www.ncbi.nlm.nih.gov/pubmed/7678355	http://colonet.informatik.hu-berlin.de/geneview/view/abstract/7678355	The TNF-alpha induced increase in VCAM-1 mRNA levels is blocked with STS and ACT D, but is superinduced with CHX.	VCAM-1|22329@10090	TNF-alpha|21926@10090	0.995694
PMID.dPMID9354685.s9.p0	http://www.ncbi.nlm.nih.gov/pubmed/9354685	http://colonet.informatik.hu-berlin.de/geneview/view/abstract/9354685	These results show that TNFalpha is an effective inducer of eosinophil accumulation in vivo, with this response being dependent on an interaction between alpha4 integrins and VCAM-1.	VCAM-1|25361@10116	TNFalpha|24835@10116	0.990784
PMID.dPMID20039412.s12.p0	http://www.ncbi.nlm.nih.gov/pubmed/20039412	http://colonet.informatik.hu-berlin.de/geneview/view/abstract/20039412	In RASFs, TNFalpha-induced VCAM-1 expression is mediated through activation of the p42/p44 MAPK, p38 MAPK, JNK, and NF-kappaB pathways.	VCAM-1|7412@9606	TNFalpha|7124@9606	0.990627
PMID.dPMID11359843.s9.p0	http://www.ncbi.nlm.nih.gov/pubmed/11359843	http://colonet.informatik.hu-berlin.de/geneview/view/abstract/11359843	Moreover, dominant negative versions of IKK inhibit TNF-alpha activation of a VCAM1 promoter reporter.	VCAM1|22329@10090	TNF-alpha|21926@10090	0.948279
PMID.dPMID15265939.s8.p0	http://www.ncbi.nlm.nih.gov/pubmed/15265939	http://colonet.informatik.hu-berlin.de/geneview/view/abstract/15265939	Combined, the results indicate that phenyl methimazole can reduce TNF-alpha-induced VCAM-1 expression in an IFN regulatory factor-1-dependent manner and that this contributes significantly to reduced monocytic cell adhesion to TNF-alpha-activated HAEC.	VCAM-1|7412@9606	TNF-alpha|7124@9606	0.93852
PMID.dPMID7541294.s6.p0	http://www.ncbi.nlm.nih.gov/pubmed/7541294	http://colonet.informatik.hu-berlin.de/geneview/view/abstract/7541294	TNF-alpha-stimulated human VSMCs demonstrate increased binding of T lymphocytes that is totally VCAM-1 mediated.	VCAM-1|7412@9606	TNF-alpha|7124@9606	0.926544
Sentences between TNF and ADIPOQ
PMID.dPMID19348241.s7.p0	http://www.ncbi.nlm.nih.gov/pubmed/19348241	http://colonet.informatik.hu-berlin.de/geneview/view/abstract/19348241	Large sized adipocytes increase TNF-alpha and decrease adiponectin.	adiponectin|9370@9606	TNF-alpha|7124@9606	165996
PMID.dPMID15826474.s12.p0	http://www.ncbi.nlm.nih.gov/pubmed/15826474	http://colonet.informatik.hu-berlin.de/geneview/view/abstract/15826474	No relationship was observed between adiponectin and TNFalpha subcutaneous adipose tissue expression.	TNFalpha|7124@9606	adiponectin|9370@9606	134828
PMID.dPMID18487876.s10.p0	http://www.ncbi.nlm.nih.gov/pubmed/18487876	http://colonet.informatik.hu-berlin.de/geneview/view/abstract/18487876	In addition, there was a significant negative correlation between plasma TNF-alpha and adiponectin levels in theOSAS group.	adiponectin|9370@9606	TNF-alpha|7124@9606	127014
PMID.dPMID19149923.s22.p0	http://www.ncbi.nlm.nih.gov/pubmed/19149923	http://colonet.informatik.hu-berlin.de/geneview/view/abstract/19149923	There was an interaction between ADPN and TNF-alpha, suggesting that they both participate in the development of childhood obesity.	TNF-alpha|7124@9606	ADPN|9370@9606	124625
PMID.dPMID16170395.s22.p0	http://www.ncbi.nlm.nih.gov/pubmed/16170395	http://colonet.informatik.hu-berlin.de/geneview/view/abstract/16170395	This suggests that alcohol may modulate the inhibitory effect of TNF-alpha on AN production, and thus, increase its plasma concentrations.	AN|9370@9606	TNF-alpha|7124@9606	122622
PMID.dPMID19149923.s20.p0	http://www.ncbi.nlm.nih.gov/pubmed/19149923	http://colonet.informatik.hu-berlin.de/geneview/view/abstract/19149923	There was a significant interaction between ADPN and TNF-alpha (p<0.05).	TNF-alpha|7124@9606	ADPN|9370@9606	116733
PMID.dPMID17454170.s1.p0	http://www.ncbi.nlm.nih.gov/pubmed/17454170	http://colonet.informatik.hu-berlin.de/geneview/view/abstract/17454170	Circulating concentrations of adiponectin and tumor necrosis factor-alpha in gestational diabetes mellitus.	tumor necrosis factor-alpha|7124@9606	adiponectin|9370@9606	108975
PMID.dPMID16170395.s1.p0	http://www.ncbi.nlm.nih.gov/pubmed/16170395	http://colonet.informatik.hu-berlin.de/geneview/view/abstract/16170395	High adiponectin and TNF-alpha levels in moderate drinkers suffering from liver steatosis: comparison with non drinkers suffering from similar hepatopathy.	TNF-alpha|7124@9606	adiponectin|9370@9606	10831
PMID.dPMID17454170.s13.p0	http://www.ncbi.nlm.nih.gov/pubmed/17454170	http://colonet.informatik.hu-berlin.de/geneview/view/abstract/17454170	In conclusion, these data suggest that reduced adiponectin and increased TNF-alpha may be involved in the pathogenesis of GDM.	TNF-alpha|7124@9606	adiponectin|9370@9606	101738
PMID.dPMID19662887.s4.p2	http://www.ncbi.nlm.nih.gov/pubmed/19662887	http://colonet.informatik.hu-berlin.de/geneview/view/abstract/19662887	Such hormones are adipocytokines--leptin, adiponectin, TNF-alpha, IL-6, resistin and visfatin.	TNF-alpha|7124@9606	adiponectin|9370@9606	0.952905
Sentences between TNF and TLR4
PMID.dPMID15520404.s1.p0	http://www.ncbi.nlm.nih.gov/pubmed/15520404	http://colonet.informatik.hu-berlin.de/geneview/view/abstract/15520404	TLR4 and TNF-alpha polymorphisms are associated with an increased risk for severe sepsis following burn injury.	TNF-alpha|7124@9606	TLR4|7099@9606	130995
PMID.dPMID20519843.s14.p0	http://www.ncbi.nlm.nih.gov/pubmed/20519843	http://colonet.informatik.hu-berlin.de/geneview/view/abstract/20519843	These findings strongly suggest that LPS exerts its protective action against HD toxicity through the generation of TNF-alpha and may provide better understanding of the mechanism of cytoprotection.	TNF-alpha|21926@10090	LPS|21898@10090	108932
PMID.dPMID19106809.s5.p0	http://www.ncbi.nlm.nih.gov/pubmed/19106809	http://colonet.informatik.hu-berlin.de/geneview/view/abstract/19106809	We speculate that the changing of TNF-alpha level during CPB may be involved in monocytic TLR4 expression.	TLR4|7099@9606	TNF-alpha|7124@9606	10338
PMID.dPMID2272660.s2.p0	http://www.ncbi.nlm.nih.gov/pubmed/2272660	http://colonet.informatik.hu-berlin.de/geneview/view/abstract/2272660	Evidence that polymorphism at the Tnfa and Lps loci governs susceptibility.	Lps|21898@10090	Tnfa|21926@10090	0.932154
PMID.dPMID17219951.s10.p0	http://www.ncbi.nlm.nih.gov/pubmed/17219951	http://colonet.informatik.hu-berlin.de/geneview/view/abstract/17219951	It was concluded that shRNA targeting TLR4 gene could inhibit the TNF-alpha release by RAW264.7 cells evoked by LPS.	TNF-alpha|7124@9606	TLR4|7099@9606	0.927345
PMID.dPMID18060704.s7.p0	http://www.ncbi.nlm.nih.gov/pubmed/18060704	http://colonet.informatik.hu-berlin.de/geneview/view/abstract/18060704	As expected, TNF-alpha was obviously increased in maternal serum and amniotic fluid in response to LPS.	LPS|21898@10090	TNF-alpha|21926@10090	0.865056
PMID.dPMID15334694.s10.p0	http://www.ncbi.nlm.nih.gov/pubmed/15334694	http://colonet.informatik.hu-berlin.de/geneview/view/abstract/15334694	Anti TLR4 antibody can inhibit the production of TNF-alpha induced by LPS.	TNF-alpha|24835@10116	TLR4|29260@10116	0.846398
PMID.dPMID17339471.s1.p0	http://www.ncbi.nlm.nih.gov/pubmed/17339471	http://colonet.informatik.hu-berlin.de/geneview/view/abstract/17339471	TLR4-mediated survival of macrophages is MyD88 dependent and requires TNF-alpha autocrine signalling.	TNF-alpha|21926@10090	TLR4|21898@10090	0.815844
PMID.dPMID12577379.s6.p0	http://www.ncbi.nlm.nih.gov/pubmed/12577379	http://colonet.informatik.hu-berlin.de/geneview/view/abstract/12577379	LPS could induce endotoxemia and high serum level of TNF alpha, decrease the rectal temperature and WBC, reduce blood glucose and increase serum triglyceride and cholesterol levels.	TNF alpha|21926@10090	LPS|21898@10090	0.787197
PMID.dPMID12368220.s7.p0	http://www.ncbi.nlm.nih.gov/pubmed/12368220	http://colonet.informatik.hu-berlin.de/geneview/view/abstract/12368220	LPS also induced the expression of TNF-alpha in biliary epithelial cells and its secretion into the culture medium.	TNF-alpha|21926@10090	LPS|21898@10090	0.769532
Sentences between TNF and ADAM17
PMID.dPMID15603556.s11.p0	http://www.ncbi.nlm.nih.gov/pubmed/15603556	http://colonet.informatik.hu-berlin.de/geneview/view/abstract/15603556	There was a positive correlation between TACE and TNF-alpha levels in AMI.	TNF-alpha|7124@9606	TACE|6868@9606	135864
PMID.dPMID15603556.s8.p0	http://www.ncbi.nlm.nih.gov/pubmed/15603556	http://colonet.informatik.hu-berlin.de/geneview/view/abstract/15603556	TACE-mediated TNF-alpha production was evaluated in cultured PBMCs with PMA, which is known to activate TACE.	TNF-alpha|7124@9606	TACE|6868@9606	133697
PMID.dPMID10669637.s12.p0	http://www.ncbi.nlm.nih.gov/pubmed/10669637	http://colonet.informatik.hu-berlin.de/geneview/view/abstract/10669637	These results suggest that HUVEC produce TNF-alpha and have TACE activity.	TACE|6868@9606	TNF-alpha|7124@9606	127326
PMID.dPMID17999917.s4.p0	http://www.ncbi.nlm.nih.gov/pubmed/17999917	http://colonet.informatik.hu-berlin.de/geneview/view/abstract/17999917	TNFalpha induced the conversion from the proform of ADAM-17 to its mature form time-dependently.	ADAM-17|6868@9606	TNFalpha|7124@9606	117585
PMID.dPMID18226043.s11.p0	http://www.ncbi.nlm.nih.gov/pubmed/18226043	http://colonet.informatik.hu-berlin.de/geneview/view/abstract/18226043	A positive correlation was seen between local TACE and TNF-alpha levels in AMI patients.	TNF-alpha|7124@9606	TACE|6868@9606	116357
PMID.dPMID15135989.s8.p0	http://www.ncbi.nlm.nih.gov/pubmed/15135989	http://colonet.informatik.hu-berlin.de/geneview/view/abstract/15135989	These results suggest that equine TNF-alpha, like its human homologue, is released from its membrane-bound position by TACE.	TACE|6868@9606	TNF-alpha|7124@9606	106429
PMID.dPMID17264149.s1.p0	http://www.ncbi.nlm.nih.gov/pubmed/17264149	http://colonet.informatik.hu-berlin.de/geneview/view/abstract/17264149	TACE release of TNF-alpha mediates mechanotransduction-induced activation of p38 MAPK and myogenesis.	TNF-alpha|21926@10090	TACE|11491@10090	103834
PMID.dPMID16926839.s10.p1	http://www.ncbi.nlm.nih.gov/pubmed/16926839	http://colonet.informatik.hu-berlin.de/geneview/view/abstract/16926839	Furthermore, primary culture SVZ neurospheres from ischemic brain overexpress TACE and its substrates APP and TNF-alpha.	TNF-alpha|24835@10116	TACE|57027@10116	10147
PMID.dPMID10419777.s5.p0	http://www.ncbi.nlm.nih.gov/pubmed/10419777	http://colonet.informatik.hu-berlin.de/geneview/view/abstract/10419777	The OA-affected cartilage has upregulated mRNA for TNFalpha and TACE as compared to normal cartilage.	TACE|6868@9606	TNFalpha|7124@9606	10098
PMID.dPMID15556048.s8.p0	http://www.ncbi.nlm.nih.gov/pubmed/15556048	http://colonet.informatik.hu-berlin.de/geneview/view/abstract/15556048	There was a positive correlation between TACE and TNF-alpha levels in CHF patients (mRNA: r=0.60,	TNF-alpha|7124@9606	TACE|6868@9606	100635
Sentences between TNF and IGF1
PMID.dPMID12810554.s5.p0	http://www.ncbi.nlm.nih.gov/pubmed/12810554	http://colonet.informatik.hu-berlin.de/geneview/view/abstract/12810554	We establish that TNFalpha inhibits IGF-I-stimulated protein synthesis in primary porcine myoblasts.	IGF-I|16000@10090	TNFalpha|21926@10090	132303
PMID.dPMID16569464.s8.p0	http://www.ncbi.nlm.nih.gov/pubmed/16569464	http://colonet.informatik.hu-berlin.de/geneview/view/abstract/16569464	The present results suggest that increased TNF-alpha levels are involved in the pathogenesis of AD and MCI, and might antagonize the neurotrophic activity of IGF-I in these medical conditions.	IGF-I|3479@9606	TNF-alpha|7124@9606	130776
PMID.dPMID12388149.s11.p0	http://www.ncbi.nlm.nih.gov/pubmed/12388149	http://colonet.informatik.hu-berlin.de/geneview/view/abstract/12388149	Taken together, our data suggest that TNF-alpha induced in muscle after LPS injection can locally inhibit IGF-I expression.	IGF-I|24482@10116	TNF-alpha|24835@10116	120116
PMID.dPMID10449788.s4.p0	http://www.ncbi.nlm.nih.gov/pubmed/10449788	http://colonet.informatik.hu-berlin.de/geneview/view/abstract/10449788	Conventional roles for these two proteins are neuroprotection by IGF-I and neurotoxicity by TNF-alpha.	TNF-alpha|21926@10090	IGF-I|16000@10090	113276
PMID.dPMID16141211.s16.p0	http://www.ncbi.nlm.nih.gov/pubmed/16141211	http://colonet.informatik.hu-berlin.de/geneview/view/abstract/16141211	We conclude that TNFalpha and IGF-I may additively contribute to fibrosis during intestinal inflammation.	IGF-I|16000@10090	TNFalpha|21926@10090	108801
PMID.dPMID17279553.s13.p0	http://www.ncbi.nlm.nih.gov/pubmed/17279553	http://colonet.informatik.hu-berlin.de/geneview/view/abstract/17279553	Our results indicate that IGF-I is capable of protecting myelin and oligodendrocytes from TNF-alpha-induced damage in vivo.	TNF-alpha|21926@10090	IGF-I|16000@10090	105535
PMID.dPMID7503312.s6.p0	http://www.ncbi.nlm.nih.gov/pubmed/7503312	http://colonet.informatik.hu-berlin.de/geneview/view/abstract/7503312	In contrast, TNF-alpha increased IGF-I content in kidney and brain.	IGF-I|24482@10116	TNF-alpha|21926@10090	0.991318
PMID.dPMID10510538.s8.p0	http://www.ncbi.nlm.nih.gov/pubmed/10510538	http://colonet.informatik.hu-berlin.de/geneview/view/abstract/10510538	In women a correlation was found between IGF-I and TNF-alpha concentrations (r = 0.65, p < 0.01).	TNF-alpha|7124@9606	IGF-I|3479@9606	0.944752
PMID.dPMID16569464.s1.p0	http://www.ncbi.nlm.nih.gov/pubmed/16569464	http://colonet.informatik.hu-berlin.de/geneview/view/abstract/16569464	Serum TNF-alpha levels are increased and correlate negatively with free IGF-I in Alzheimer disease.	IGF-I|3479@9606	TNF-alpha|7124@9606	0.894987
PMID.dPMID9735418.s9.p0	http://www.ncbi.nlm.nih.gov/pubmed/9735418	http://colonet.informatik.hu-berlin.de/geneview/view/abstract/9735418	TNF-alpha also decreases IGF-I receptor levels in MCF-7 cells.	IGF-I|3479@9606	TNF-alpha|7124@9606	0.837642
Sentences between TNF and CCL5
PMID.dPMID10604552.s7.p0	http://www.ncbi.nlm.nih.gov/pubmed/10604552	http://colonet.informatik.hu-berlin.de/geneview/view/abstract/10604552	The results showed that TNF-alpha induced RANTES production and p38 MAP kinase activity in human pulmonary vascular endothelial cells.	RANTES|6352@9606	TNF-alpha|7124@9606	114032
PMID.dPMID10888363.s9.p0	http://www.ncbi.nlm.nih.gov/pubmed/10888363	http://colonet.informatik.hu-berlin.de/geneview/view/abstract/10888363	RANTES secretion by HUVEC could be induced only with TNF-alpha/IFN-gamma.	TNF-alpha|7124@9606	RANTES|6352@9606	0.982897
PMID.dPMID11466387.s13.p0	http://www.ncbi.nlm.nih.gov/pubmed/11466387	http://colonet.informatik.hu-berlin.de/geneview/view/abstract/11466387	TNF-alpha-treated DC lose responsiveness to RANTES.	RANTES|20304@10090	TNF-alpha|21926@10090	0.965976
PMID.dPMID10604552.s8.p0	http://www.ncbi.nlm.nih.gov/pubmed/10604552	http://colonet.informatik.hu-berlin.de/geneview/view/abstract/10604552	Abrogation of p38 MAP kinase activity by SB 203580 repressed TNF-alpha-induced p38 MAP kinase activity and RANTES production.	RANTES|6352@9606	TNF-alpha|7124@9606	0.958912
PMID.dPMID11167962.s10.p0	http://www.ncbi.nlm.nih.gov/pubmed/11167962	http://colonet.informatik.hu-berlin.de/geneview/view/abstract/11167962	These results indicate that cellular redox regulated by GSH is critical for TNF-alpha-induced p38 MAP kinase activation and p38 MAP kinase-mediated RANTES production by human BECs.	RANTES|6352@9606	TNF-alpha|7124@9606	0.866435
PMID.dPMID10946305.s7.p1	http://www.ncbi.nlm.nih.gov/pubmed/10946305	http://colonet.informatik.hu-berlin.de/geneview/view/abstract/10946305	We found that TNF-alpha, which binds the ECM protein fibronectin and lacks adhesion- and migration-promoting effects of its own, can act as a proadhesive cytokine on T cells exposed to RANTES and SDF-1alpha.	RANTES|6352@9606	TNF-alpha|7124@9606	0.848088
PMID.dPMID10843427.s7.p27	http://www.ncbi.nlm.nih.gov/pubmed/10843427	http://colonet.informatik.hu-berlin.de/geneview/view/abstract/10843427	The results showed that 1) NAC attenuated TNF-alpha-induced p38MAP kinase activation and RANTES production 2) SB 203580 as the specific inhibitor of p38 MAP kinase activity attenuated TNF-alpha-induced RANTES production 3) BSO facilitated TNF-alpha-induced p38 MAP kinase activation and RANTES production 4) SB 203580 attenuated BSO-mediated facilitation of TNF-alpha-induced RANTES production.	RANTES|6352@9606	TNF-alpha|7124@9606	0.842673
PMC.dPMC9610617.s7.p0	http://www.ncbi.nlm.nih.gov/pubmed/9610617	http://colonet.informatik.hu-berlin.de/geneview/view/abstract/9610617	TNF-alpha also induced RANTES gene expression but LPS did not.	RANTES|81780@10116	TNF-alpha|24835@10116	0.822781
PMID.dPMID9610617.s7.p0	http://www.ncbi.nlm.nih.gov/pubmed/9610617	http://colonet.informatik.hu-berlin.de/geneview/view/abstract/9610617	TNF-alpha also induced RANTES gene expression but LPS did not.	RANTES|81780@10116	TNF-alpha|24835@10116	0.822781
PMID.dPMID12663241.s11.p0	http://www.ncbi.nlm.nih.gov/pubmed/12663241	http://colonet.informatik.hu-berlin.de/geneview/view/abstract/12663241	Moreover, TNF-alpha-induced RANTES expression was completely inhibited by SB203580, but not calphostin C and wortmannin.	RANTES|6352@9606	TNF-alpha|7124@9606	0.816162
Sentences between TNF and IL18
PMID.dPMID14640907.s9.p0	http://www.ncbi.nlm.nih.gov/pubmed/14640907	http://colonet.informatik.hu-berlin.de/geneview/view/abstract/14640907	These may implicate the positive circuit between IL-18 and TNF-alpha for development of RA.	TNF-alpha|21926@10090	IL-18|16173@10090	14932
PMID.dPMID20111957.s15.p0	http://www.ncbi.nlm.nih.gov/pubmed/20111957	http://colonet.informatik.hu-berlin.de/geneview/view/abstract/20111957	The present results suggest that IL-18 may inhibit TNF-alpha-mediated osteoclastogenesis in vivo via a T cell-independent mechanism.	TNF-alpha|21926@10090	IL-18|16173@10090	119511
PMID.dPMID20111957.s9.p0	http://www.ncbi.nlm.nih.gov/pubmed/20111957	http://colonet.informatik.hu-berlin.de/geneview/view/abstract/20111957	We previously showed that IL-12 and IL-18 synergistically inhibit TNF-alpha-mediated osteoclastogenesis in vitro.	TNF-alpha|21926@10090	IL-18|16173@10090	111668
PMID.dPMID19581111.s4.p0	http://www.ncbi.nlm.nih.gov/pubmed/19581111	http://colonet.informatik.hu-berlin.de/geneview/view/abstract/19581111	We measured TNFalpha and IL-18 in plasma from 446 MI cases and 477 age- and sex-matched controls from North Glasgow.	IL-18|3606@9606	TNFalpha|7124@9606	10636
PMID.dPMID21586238.s7.p9	http://www.ncbi.nlm.nih.gov/pubmed/21586238	http://colonet.informatik.hu-berlin.de/geneview/view/abstract/21586238	The correlation between Gc globulin and IL-10, IL-4, IL-18, TNFa, endotoxin, NO, sVCAM-1and sICAM-1were analyzed by Pearson correlation analysis.	TNFa|7124@9606	IL-18|3606@9606	0.976761
PMID.dPMID16514436.s8.p0	http://www.ncbi.nlm.nih.gov/pubmed/16514436	http://colonet.informatik.hu-berlin.de/geneview/view/abstract/16514436	In vitro, IL-18 primed superoxide production by ANCA-activated neutrophils comparably to TNFalpha.	TNFalpha|7124@9606	IL-18|3606@9606	0.924886
PMID.dPMID14640907.s7.p0	http://www.ncbi.nlm.nih.gov/pubmed/14640907	http://colonet.informatik.hu-berlin.de/geneview/view/abstract/14640907	TNF-alpha, in turn, increases IL-18 expression in RA synovial cells.	IL-18|16173@10090	TNF-alpha|21926@10090	0.909641
PMID.dPMID15072171.s8.p5	http://www.ncbi.nlm.nih.gov/pubmed/15072171	http://colonet.informatik.hu-berlin.de/geneview/view/abstract/15072171	IL-15, IL-17, IL-18 and TNF-alpha could be detected also in blood plasma.	TNF-alpha|7124@9606	IL-18|3606@9606	0.901408
PMC.dPMC19823581.s200.p2	http://www.ncbi.nlm.nih.gov/pubmed/19823581	http://colonet.informatik.hu-berlin.de/geneview/view/abstract/19823581	The right panels show the negative correlation between miR-150 and IL-10, IL-18 and TNF-alpha, respectively.	TNF-alpha|7124@9606	IL-18|3606@9606	0.892011
PMID.dPMID12124212.s9.p0	http://www.ncbi.nlm.nih.gov/pubmed/12124212	http://colonet.informatik.hu-berlin.de/geneview/view/abstract/12124212	However, myocardial TNF-alpha levels were not influenced by neutralization of IL-18.	IL-18|16173@10090	TNF-alpha|21926@10090	0.87726
Sentences between Il1 and TNF
PMID.dPMID11015350.s13.p0	http://www.ncbi.nlm.nih.gov/pubmed/11015350	http://colonet.informatik.hu-berlin.de/geneview/view/abstract/11015350	These results directly demonstrate that TNF-alpha and IL-1 modulate NIH induced by low shear stress.	IL-1|111343@10090	TNF-alpha|21926@10090	154239
PMID.dPMID15353364.s4.p0	http://www.ncbi.nlm.nih.gov/pubmed/15353364	http://colonet.informatik.hu-berlin.de/geneview/view/abstract/15353364	Typical pro-inflammatory cytokines include TNFalpha, IL1 and IL6.	IL1|111343@10090	TNFalpha|21926@10090	136305
PMID.dPMID10449438.s6.p0	http://www.ncbi.nlm.nih.gov/pubmed/10449438	http://colonet.informatik.hu-berlin.de/geneview/view/abstract/10449438	TNF-alpha and IL-1 production in response to LPS was increased in BMT recipients after Cy/TBI conditioning.	IL-1|111343@10090	TNF-alpha|21926@10090	134926
PMID.dPMID9558117.s4.p0	http://www.ncbi.nlm.nih.gov/pubmed/9558117	http://colonet.informatik.hu-berlin.de/geneview/view/abstract/9558117	IL-1, TNF-alpha, and LPS mobilize LC from epidermis and presumably attenuate LC-keratinocyte adhesion.	TNF-alpha|21926@10090	IL-1|111343@10090	114932
PMID.dPMID8249628.s7.p0	http://www.ncbi.nlm.nih.gov/pubmed/8249628	http://colonet.informatik.hu-berlin.de/geneview/view/abstract/8249628	Studies on IL-1 and TNF-alpha production induced by ABP (200 micrograms.ml-1)	TNF-alpha|21926@10090	IL-1|111343@10090	0.972043
PMID.dPMID9762667.s6.p0	http://www.ncbi.nlm.nih.gov/pubmed/9762667	http://colonet.informatik.hu-berlin.de/geneview/view/abstract/9762667	During clinical activity monocyte activation markers increase and IL-1 and TNF-alpha levels are elevated.	TNF-alpha|21926@10090	IL-1|111343@10090	0.9587
PMID.dPMID15591249.s10.p0	http://www.ncbi.nlm.nih.gov/pubmed/15591249	http://colonet.informatik.hu-berlin.de/geneview/view/abstract/15591249	The data suggest that compensatory production of TNF-alpha in IL-1 KO mice contributes to the host defence against K. pneumoniae infection.	IL-1|111343@10090	TNF-alpha|21926@10090	0.941409
PMID.dPMID19216058.s5.p0	http://www.ncbi.nlm.nih.gov/pubmed/19216058	http://colonet.informatik.hu-berlin.de/geneview/view/abstract/19216058	We determined whether IL-1 and TNFalpha also regulate fetal barrier development.	TNFalpha|21926@10090	IL-1|111343@10090	0.897777
PMID.dPMID17123788.s1.p0	http://www.ncbi.nlm.nih.gov/pubmed/17123788	http://colonet.informatik.hu-berlin.de/geneview/view/abstract/17123788	Roles for IL-1 and TNFalpha in dynamic behavioral responses of Langerhans cells to topical hapten application.	TNFalpha|21926@10090	IL-1|111343@10090	0.79267
PMID.dPMID9770330.s16.p0	http://www.ncbi.nlm.nih.gov/pubmed/9770330	http://colonet.informatik.hu-berlin.de/geneview/view/abstract/9770330	It can be concluded that both TNF-alpha and IL-1 exert specific activities in SCW arthritis.	IL-1|111343@10090	TNF-alpha|21926@10090	0.785619
Sentences between TNF and JUN
PMID.dPMID20141610.s11.p0	http://www.ncbi.nlm.nih.gov/pubmed/20141610	http://colonet.informatik.hu-berlin.de/geneview/view/abstract/20141610	Together, these results suggest that TNF-alpha induces expression and DNA binding of AP-1 resulting in increased transcription of the TGF-beta(1) gene.	AP-1|16476@10090	TNF-alpha|21926@10090	123633
PMID.dPMID9988757.s8.p0	http://www.ncbi.nlm.nih.gov/pubmed/9988757	http://colonet.informatik.hu-berlin.de/geneview/view/abstract/9988757	Gel shift and supershift analysis showed that TNF-alpha increased AP-1 DNA binding which was predominantly formed by dimers of c-Jun.	AP-1|3725@9606	TNF-alpha|7124@9606	108147
PMID.dPMID19052522.s9.p0	http://www.ncbi.nlm.nih.gov/pubmed/19052522	http://colonet.informatik.hu-berlin.de/geneview/view/abstract/19052522	Our data showed that TNF-alpha-induced AP-1 DNA binding activity was inhibited by BBR.	AP-1|3725@9606	TNF-alpha|7124@9606	106461
PMID.dPMID8321230.s1.p1	http://www.ncbi.nlm.nih.gov/pubmed/8321230	http://colonet.informatik.hu-berlin.de/geneview/view/abstract/8321230	The mitogenic response to tumor necrosis factor alpha requires c-Jun/AP-1.	AP-1|3725@9606	tumor necrosis factor alpha|7124@9606	0.972981
PMID.dPMID8321230.s1.p0	http://www.ncbi.nlm.nih.gov/pubmed/8321230	http://colonet.informatik.hu-berlin.de/geneview/view/abstract/8321230	The mitogenic response to tumor necrosis factor alpha requires c-Jun/AP-1.	c-Jun|3725@9606	tumor necrosis factor alpha|7124@9606	0.972981
PMID.dPMID19933155.s1.p0	http://www.ncbi.nlm.nih.gov/pubmed/19933155	http://colonet.informatik.hu-berlin.de/geneview/view/abstract/19933155	TNFalpha shedding and epidermal inflammation are controlled by Jun proteins.	Jun|16476@10090	TNFalpha|21926@10090	0.864716
PMID.dPMID10754326.s7.p5	http://www.ncbi.nlm.nih.gov/pubmed/10754326	http://colonet.informatik.hu-berlin.de/geneview/view/abstract/10754326	Following LPS stimulation, NF-kappa B p50/p65 heterodimers bound to the kappa B3 site and c-Jun to the -103 AP-1 site of the TNF-alpha promoter.	TNF-alpha|7124@9606	c-Jun|3725@9606	0.862891
PMID.dPMID17082637.s3.p0	http://www.ncbi.nlm.nih.gov/pubmed/17082637	http://colonet.informatik.hu-berlin.de/geneview/view/abstract/17082637	Among the several effectors that mediate TNF-alpha action is AP-1, which consists of transcription factors belonging to the JUN and FOS families.	AP-1|3725@9606	TNF-alpha|7124@9606	0.855796
PMID.dPMID14661063.s3.p0	http://www.ncbi.nlm.nih.gov/pubmed/14661063	http://colonet.informatik.hu-berlin.de/geneview/view/abstract/14661063	Keratinocyte-derived TNF-alpha acts as an endogenous tumour promoter and can also regulate AP-1 activity in mouse epidermis.	AP-1|16476@10090	TNF-alpha|21926@10090	0.85241
PMID.dPMID17914058.s8.p0	http://www.ncbi.nlm.nih.gov/pubmed/17914058	http://colonet.informatik.hu-berlin.de/geneview/view/abstract/17914058	Furthermore, AP-1 depletion leads to increased surface levels of TNF-alpha, a cargo known to traffic through the endosomes to the plasma membrane upon stimulation of the macrophages.	TNF-alpha|21926@10090	AP-1|16476@10090	0.841856
Sentences between SELE and TNF
PMID.dPMID9848873.s15.p0	http://www.ncbi.nlm.nih.gov/pubmed/9848873	http://colonet.informatik.hu-berlin.de/geneview/view/abstract/9848873	are involved in the IL-1- and TNF-alpha-mediated induction of E-selectin.	E-selectin|6401@9606	TNF-alpha|7124@9606	115229
PMID.dPMID11716764.s6.p0	http://www.ncbi.nlm.nih.gov/pubmed/11716764	http://colonet.informatik.hu-berlin.de/geneview/view/abstract/11716764	In contrast, TNF-alpha-induced E-selectin protein expression was augmented after mevastatin treatment.	E-selectin|6401@9606	TNF-alpha|7124@9606	108367
PMID.dPMID12031586.s9.p0	http://www.ncbi.nlm.nih.gov/pubmed/12031586	http://colonet.informatik.hu-berlin.de/geneview/view/abstract/12031586	Co-stimulation with TNF-alpha and a second cytokine reduces its influence on E-selectin.	E-selectin|20339@10090	TNF-alpha|21926@10090	0.96053
PMID.dPMID14630701.s5.p2	http://www.ncbi.nlm.nih.gov/pubmed/14630701	http://colonet.informatik.hu-berlin.de/geneview/view/abstract/14630701	As shown by ELISA and FACS analyses, HMG-CoA reductase inhibitors (e.g., lovastatin) impair the TNF-alpha stimulated increase in E-selectin protein expression.	E-selectin|6401@9606	TNF-alpha|7124@9606	0.918239
PMID.dPMID17126899.s7.p0	http://www.ncbi.nlm.nih.gov/pubmed/17126899	http://colonet.informatik.hu-berlin.de/geneview/view/abstract/17126899	The results show that pre-treating ECs with NACOS inhibited the TNF-alpha-induced E-selectin expression in a dose- and time-dependent manner.	E-selectin|6401@9606	TNF-alpha|7124@9606	0.891542
PMID.dPMID20465310.s10.p0	http://www.ncbi.nlm.nih.gov/pubmed/20465310	http://colonet.informatik.hu-berlin.de/geneview/view/abstract/20465310	TNF-alpha markedly induced protein expression of cell adhesion molecule and E-selectin with increasing mRNA levels in HUVEC.	E-selectin|6401@9606	TNF-alpha|7124@9606	0.881504
PMID.dPMID15583752.s9.p0	http://www.ncbi.nlm.nih.gov/pubmed/15583752	http://colonet.informatik.hu-berlin.de/geneview/view/abstract/15583752	These observations suggested that AT inhibited the TNF-alpha-induced increase in E-selectin expression in HUVECs by inhibiting the interaction of NF-kappaB with CBP/p300 through cAMP-dependent protein kinase A-induced CREB activation.	E-selectin|6401@9606	TNF-alpha|7124@9606	0.878751
PMID.dPMID11403206.s7.p0	http://www.ncbi.nlm.nih.gov/pubmed/11403206	http://colonet.informatik.hu-berlin.de/geneview/view/abstract/11403206	Blocking PARP via GPI 6150 only affected TNF-alpha induced E-selectin expression at 4 hours.	E-selectin|6401@9606	TNF-alpha|7124@9606	0.827423
PMID.dPMID21876235.s13.p0	http://www.ncbi.nlm.nih.gov/pubmed/21876235	http://colonet.informatik.hu-berlin.de/geneview/view/abstract/21876235	On the contrary, the induction of E-selectin by TNF-alpha in ECs exposed to non-uniform shear stress was not affected by telmisartan.	TNF-alpha|7124@9606	E-selectin|6401@9606	0.788138
PMID.dPMID12208465.s1.p0	http://www.ncbi.nlm.nih.gov/pubmed/12208465	http://colonet.informatik.hu-berlin.de/geneview/view/abstract/12208465	Increased intracellular calcium transients by calmodulin antagonists differentially modulate tumor necrosis factor-alpha-induced E-selectin and ICAM-1 expression.	E-selectin|6401@9606	tumor necrosis factor-alpha|7124@9606	0.774583
Sentences between TNF and TNFRSF1B
PMID.dPMID19212208.s4.p1	http://www.ncbi.nlm.nih.gov/pubmed/19212208	http://colonet.informatik.hu-berlin.de/geneview/view/abstract/19212208	TNF-alpha exerts its effects by binding to specific receptors (TNFR); the polymorphism of TNFRII T587G has been associated with increased TNF apoptotic response and its presence may increase the risk to develop liver disease.	TNFRII|7133@9606	TNF-alpha|7124@9606	109322
PMID.dPMID19811435.s8.p0	http://www.ncbi.nlm.nih.gov/pubmed/19811435	http://colonet.informatik.hu-berlin.de/geneview/view/abstract/19811435	The TNF-alpha and TNFR2 genotype and allele frequencies of Asian Indians stand closer to other Asian populations but distant from Caucasians.	TNFR2|7133@9606	TNF-alpha|7124@9606	0.975679
PMID.dPMID12714259.s6.p1	http://www.ncbi.nlm.nih.gov/pubmed/12714259	http://colonet.informatik.hu-berlin.de/geneview/view/abstract/12714259	TNF-alpha exerts its biological effects via TNFR-I and TNFR-II.	TNFR-II|7133@9606	TNF-alpha|7124@9606	0.921936
PMID.dPMID19400895.s10.p3	http://www.ncbi.nlm.nih.gov/pubmed/19400895	http://colonet.informatik.hu-berlin.de/geneview/view/abstract/19400895	TNF-alpha up-regulated TRAILR1 and TRAILR2; sFasL up-regulated TNFR2.	TNFR2|7133@9606	TNF-alpha|7124@9606	0.876194
PMID.dPMID12880679.s8.p0	http://www.ncbi.nlm.nih.gov/pubmed/12880679	http://colonet.informatik.hu-berlin.de/geneview/view/abstract/12880679	A significant imbalance between TNFalpha and sTNFR p75 was found in the patients group.	p75|7133@9606	TNFalpha|7124@9606	0.866209
PMID.dPMID9032102.s7.p0	http://www.ncbi.nlm.nih.gov/pubmed/9032102	http://colonet.informatik.hu-berlin.de/geneview/view/abstract/9032102	These results suggest that TNFR2 might play a role in human obesity by modulating the actions of TNF-alpha.	TNF-alpha|7124@9606	TNFR2|7133@9606	0.827917
PMID.dPMID7664431.s4.p1	http://www.ncbi.nlm.nih.gov/pubmed/7664431	http://colonet.informatik.hu-berlin.de/geneview/view/abstract/7664431	TNF-alpha acts by binding to two specific receptors: TNFR1 and TNFR2.	TNFR2|7133@9606	TNF-alpha|7124@9606	0.82562
PMID.dPMID8381414.s4.p0	http://www.ncbi.nlm.nih.gov/pubmed/8381414	http://colonet.informatik.hu-berlin.de/geneview/view/abstract/8381414	Here we show that cells treated with TNF-alpha up-regulate the TNF-R-75 mRNA and protein levels.	TNF-R-75|7133@9606	TNF-alpha|7124@9606	0.798687
PMID.dPMID16125053.s1.p0	http://www.ncbi.nlm.nih.gov/pubmed/16125053	http://colonet.informatik.hu-berlin.de/geneview/view/abstract/16125053	IFN-gamma prevents TNF-alpha-induced apoptosis in C2C12 myotubes through down-regulation of TNF-R2 and increased NF-kappaB activity.	TNF-R2|21938@10090	TNF-alpha|21926@10090	0.788776
PMID.dPMID16859822.s4.p1	http://www.ncbi.nlm.nih.gov/pubmed/16859822	http://colonet.informatik.hu-berlin.de/geneview/view/abstract/16859822	TNFalpha acts through the binding of two types of transmembrane receptors called TNFR1 and TNFR2.	TNFR2|7133@9606	TNFalpha|7124@9606	0.764968
Sentences between TNF and AKT1
PMID.dPMID17158207.s5.p0	http://www.ncbi.nlm.nih.gov/pubmed/17158207	http://colonet.informatik.hu-berlin.de/geneview/view/abstract/17158207	We hypothesized that TNFalpha attenuated insulin signaling by dephosphorylating Akt and its targets via ceramide-activated protein phosphatase.	Akt|24185@10116	TNFalpha|24835@10116	121305
PMID.dPMID20229019.s1.p0	http://www.ncbi.nlm.nih.gov/pubmed/20229019	http://colonet.informatik.hu-berlin.de/geneview/view/abstract/20229019	Contraction-induced changes in TNFalpha and Akt-mediated signalling are associated with increased myofibrillar protein in rat skeletal muscle.	Akt|24185@10116	TNFalpha|24835@10116	115333
PMID.dPMID19836430.s13.p0	http://www.ncbi.nlm.nih.gov/pubmed/19836430	http://colonet.informatik.hu-berlin.de/geneview/view/abstract/19836430	Together, these results suggest that TNFalpha induced oxidative stress affects Akt activation to regulate actin organization and growth of glioma cells.	Akt|207@9606	TNFalpha|7124@9606	115255
PMID.dPMID20333651.s10.p0	http://www.ncbi.nlm.nih.gov/pubmed/20333651	http://colonet.informatik.hu-berlin.de/geneview/view/abstract/20333651	We also showed that TNF-alpha induced Akt translocation and the formation of an Akt/p65/p300 complex.	Akt|207@9606	TNF-alpha|7124@9606	107592
PMID.dPMID12682234.s10.p0	http://www.ncbi.nlm.nih.gov/pubmed/12682234	http://colonet.informatik.hu-berlin.de/geneview/view/abstract/12682234	Moreover, the reciprocal cross-talk between IEX-1S and PI3K/Akt may closely be involved in the regulation of TNF-alpha-induced hepatocyte apoptosis.	TNF-alpha|7124@9606	Akt|207@9606	103682
PMID.dPMID10669636.s11.p0	http://www.ncbi.nlm.nih.gov/pubmed/10669636	http://colonet.informatik.hu-berlin.de/geneview/view/abstract/10669636	Insulin counteracted this TNF-alpha-induced dephosphorylation of Akt.	Akt|207@9606	TNF-alpha|7124@9606	100835
PMID.dPMID11247802.s8.p2	http://www.ncbi.nlm.nih.gov/pubmed/11247802	http://colonet.informatik.hu-berlin.de/geneview/view/abstract/11247802	These results indicate that activation of the PI3-kinase-Akt/PKB pathway plays an essential role in protein synthesis induced by TNF-alpha in cardiac myocytes.	TNF-alpha|24835@10116	Akt|24185@10116	0.868767
PMID.dPMID20333651.s10.p1	http://www.ncbi.nlm.nih.gov/pubmed/20333651	http://colonet.informatik.hu-berlin.de/geneview/view/abstract/20333651	We also showed that TNF-alpha induced Akt translocation and the formation of an Akt/p65/p300 complex.	Akt|207@9606	TNF-alpha|7124@9606	0.853135
PMID.dPMID18094051.s12.p0	http://www.ncbi.nlm.nih.gov/pubmed/18094051	http://colonet.informatik.hu-berlin.de/geneview/view/abstract/18094051	Thus, NGF and NGF-induced TNF-alpha cooperate to activate Akt, promoting survival of normal neural cells.	Akt|24185@10116	TNF-alpha|24835@10116	0.851543
PMID.dPMID11705740.s4.p0	http://www.ncbi.nlm.nih.gov/pubmed/11705740	http://colonet.informatik.hu-berlin.de/geneview/view/abstract/11705740	Jo2 and, to a lesser extent, TNF-alpha phosphorylate Akt.	Akt|11651@10090	TNF-alpha|21926@10090	0.834303
Sentences between TNF and MAPK14
PMID.dPMID18314537.s4.p0	http://www.ncbi.nlm.nih.gov/pubmed/18314537	http://colonet.informatik.hu-berlin.de/geneview/view/abstract/18314537	We have demonstrated that the p38 mitogen-activated protein (MAP) kinase regulates TNF-alpha expression in monocytes exposed to asbestos.	TNF-alpha|7124@9606	p38|1432@9606	118067
PMID.dPMID9749946.s10.p0	http://www.ncbi.nlm.nih.gov/pubmed/9749946	http://colonet.informatik.hu-berlin.de/geneview/view/abstract/9749946	The results show that the p38 MAP-kinase pathway is not involved in TNFalpha-induced TN-C expression in cultured keratinocytes.	TNFalpha|7124@9606	p38 MAP-kinase|1432@9606	11226
PMID.dPMID18255061.s9.p0	http://www.ncbi.nlm.nih.gov/pubmed/18255061	http://colonet.informatik.hu-berlin.de/geneview/view/abstract/18255061	Our data indicate that LPS induced p38 MAPK activation was enhanced by hypoxia and consequently increased TNF-alpha secretion.	TNF-alpha|21926@10090	p38|26416@10090	10401
PMID.dPMID14998552.s12.p0	http://www.ncbi.nlm.nih.gov/pubmed/14998552	http://colonet.informatik.hu-berlin.de/geneview/view/abstract/14998552	p38 signaling pathway is involved in LPS-induced ROS, TNF-alpha and IL-12 production.	TNF-alpha|21926@10090	p38|26416@10090	10025
PMID.dPMID15746179.s11.p0	http://www.ncbi.nlm.nih.gov/pubmed/15746179	http://colonet.informatik.hu-berlin.de/geneview/view/abstract/15746179	These data suggest that TNF-alpha acts via p38 to increase atrogin1/MAFbx gene expression in skeletal muscle.	p38|26416@10090	TNF-alpha|21926@10090	0.900731
PMID.dPMID15242860.s17.p3	http://www.ncbi.nlm.nih.gov/pubmed/15242860	http://colonet.informatik.hu-berlin.de/geneview/view/abstract/15242860	These results suggest p38-MAPK/CREB/Rac1 pathway mediates TNF-alpha-induced VSMC migration.	TNF-alpha|7124@9606	p38|1432@9606	0.900534
PMID.dPMID17202326.s11.p0	http://www.ncbi.nlm.nih.gov/pubmed/17202326	http://colonet.informatik.hu-berlin.de/geneview/view/abstract/17202326	Taken together, these data indicate that augmented TNF-alpha production induced by LPS in macrophages during diabetes is due to hyperglycemia and increased LPS-dependent activation of p38 kinase.	p38|26416@10090	TNF-alpha|21926@10090	0.89532
PMID.dPMID18390808.s17.p0	http://www.ncbi.nlm.nih.gov/pubmed/18390808	http://colonet.informatik.hu-berlin.de/geneview/view/abstract/18390808	In summary, RAN enhanced TNF-alpha production after LPS treatment through augmented p38 activation, and this seems to occur through TACE.	p38|81649@10116	TNF-alpha|24835@10116	0.850221
PMID.dPMID12565927.s5.p0	http://www.ncbi.nlm.nih.gov/pubmed/12565927	http://colonet.informatik.hu-berlin.de/geneview/view/abstract/12565927	A novel series of imidazopyrimidines have been discovered that potently inhibit p38 and suppress the production of TNF-alpha in vivo.	TNF-alpha|7124@9606	p38|1432@9606	0.824049
PMID.dPMID17240354.s8.p0	http://www.ncbi.nlm.nih.gov/pubmed/17240354	http://colonet.informatik.hu-berlin.de/geneview/view/abstract/17240354	These results suggest that p38 MAPK and TNF-alpha are involved in the VEGF expression induced by HKLM in RAW264.7 cells.	TNF-alpha|21926@10090	p38|26416@10090	0.780708
Sentences between TNF and NFKBIA
PMID.dPMID17828497.s9.p0	http://www.ncbi.nlm.nih.gov/pubmed/17828497	http://colonet.informatik.hu-berlin.de/geneview/view/abstract/17828497	The inhibition of NF-kappaB activation by mutant IkappaBalpha can attenuate the resistance of HSC-T6 cells and increase its sensitivity to TNF-alpha.	TNF-alpha|24835@10116	IkappaBalpha|25493@10116	109897
PMID.dPMID12356823.s11.p0	http://www.ncbi.nlm.nih.gov/pubmed/12356823	http://colonet.informatik.hu-berlin.de/geneview/view/abstract/12356823	Modified IkappaBalpha became resistant to TNFalpha-induced proteolysis.	TNFalpha|7124@9606	IkappaBalpha|4792@9606	0.895637
PMID.dPMID8871646.s10.p0	http://www.ncbi.nlm.nih.gov/pubmed/8871646	http://colonet.informatik.hu-berlin.de/geneview/view/abstract/8871646	Endogenous IkappaBalpha is readily detected in the nucleus of HeLa cells, and its nuclear localization is increased following removal of TNF-alpha.	TNF-alpha|7124@9606	IkappaBalpha|4792@9606	0.894772
PMID.dPMID19273470.s11.p1	http://www.ncbi.nlm.nih.gov/pubmed/19273470	http://colonet.informatik.hu-berlin.de/geneview/view/abstract/19273470	IkappaBalpha, IL-8 and TNFalpha mRNA expression is increased in EEpC by a NOD2 ligand.	TNFalpha|7124@9606	IkappaBalpha|4792@9606	0.894489
PMID.dPMID10455908.s10.p0	http://www.ncbi.nlm.nih.gov/pubmed/10455908	http://colonet.informatik.hu-berlin.de/geneview/view/abstract/10455908	TNF-a-induced degradation of IkB-a was inhibited by PSI.	IkB-a|4792@9606	TNF-a|7124@9606	0.887328
PMID.dPMID10384135.s11.p0	http://www.ncbi.nlm.nih.gov/pubmed/10384135	http://colonet.informatik.hu-berlin.de/geneview/view/abstract/10384135	Consistent with these findings, the IkappaBalpha phosphorylation at Ser32 and its subsequent degradation in response to TNF-alpha was facilitated by TRX.	TNF-alpha|7124@9606	IkappaBalpha|4792@9606	0.858992
PMID.dPMID9873017.s14.p0	http://www.ncbi.nlm.nih.gov/pubmed/9873017	http://colonet.informatik.hu-berlin.de/geneview/view/abstract/9873017	Our results demonstrate that TNF-alpha activates cytosolic calpains, a parallel pathway that degrades IkappaBalpha and activates NF-kappaB activation independently of the ubiquitin-proteasome pathway.	IkappaBalpha|4792@9606	TNF-alpha|7124@9606	0.745493
PMID.dPMID12411051.s7.p0	http://www.ncbi.nlm.nih.gov/pubmed/12411051	http://colonet.informatik.hu-berlin.de/geneview/view/abstract/12411051	(3) The downregulation of IkappaB-alpha protein levels in TNF-alpha induced apoptosis was partially inhibited by TPCK.	TNF-alpha|7124@9606	IkappaB-alpha|4792@9606	0.745027
PMID.dPMID10455908.s11.p0	http://www.ncbi.nlm.nih.gov/pubmed/10455908	http://colonet.informatik.hu-berlin.de/geneview/view/abstract/10455908	Phospho-IkB-a accumulation was observed 20 minutes after TNF-a stimulation.	TNF-a|7124@9606	IkB-a|4792@9606	0.740151
PMID.dPMID18436431.s6.p0	http://www.ncbi.nlm.nih.gov/pubmed/18436431	http://colonet.informatik.hu-berlin.de/geneview/view/abstract/18436431	Compared with TNFalpha, PMA weakly induces NF-kappaB DNA binding and this effect was not associated with serine 32/36 phosphorylation of IkappaBalpha.	IkappaBalpha|4792@9606	TNFalpha|7124@9606	0.737588
Sentences between TNF and IFNA13
PMID.dPMID16542137.s1.p0	http://www.ncbi.nlm.nih.gov/pubmed/16542137	http://colonet.informatik.hu-berlin.de/geneview/view/abstract/16542137	Ingested (oral) IFN-alpha represses TNF-alpha mRNA in relapsing-remitting multiple sclerosis.	TNF-alpha|7124@9606	IFN-alpha|3439@9606	11135
PMID.dPMID1906289.s9.p0	http://www.ncbi.nlm.nih.gov/pubmed/1906289	http://colonet.informatik.hu-berlin.de/geneview/view/abstract/1906289	These results suggest that IFN-alpha and TNF-alpha are induced by different agents during HIV-1 infection.	TNF-alpha|7124@9606	IFN-alpha|3439@9606	110195
PMID.dPMID1552742.s8.p0	http://www.ncbi.nlm.nih.gov/pubmed/1552742	http://colonet.informatik.hu-berlin.de/geneview/view/abstract/1552742	These results contradict the hypothesis that IFN alpha exerts its therapeutic action in HCL by inhibition of autocrine TNF alpha production.	TNF alpha|7124@9606	IFN alpha|3439@9606	105946
PMID.dPMID12445524.s5.p0	http://www.ncbi.nlm.nih.gov/pubmed/12445524	http://colonet.informatik.hu-berlin.de/geneview/view/abstract/12445524	In 1989 we proposed also treating AD including AIDS by removing TNF-alpha and IFN-alpha.	IFN-alpha|3439@9606	TNF-alpha|7124@9606	0.989494
PMID.dPMID16270532.s5.p0	http://www.ncbi.nlm.nih.gov/pubmed/16270532	http://colonet.informatik.hu-berlin.de/geneview/view/abstract/16270532	IFN-alpha enhanced TNF-alpha-induced apoptosis.	TNF-alpha|7124@9606	IFN-alpha|3439@9606	0.957092
PMID.dPMID12949243.s8.p0	http://www.ncbi.nlm.nih.gov/pubmed/12949243	http://colonet.informatik.hu-berlin.de/geneview/view/abstract/12949243	Synergy between IFN-alpha and TNF-alpha was also seen for CXCL9 and CXCL10 mRNA expression.	TNF-alpha|7124@9606	IFN-alpha|3439@9606	0.947191
PMID.dPMID18535206.s10.p2	http://www.ncbi.nlm.nih.gov/pubmed/18535206	http://colonet.informatik.hu-berlin.de/geneview/view/abstract/18535206	CD300a/c triggering by cross-linking antibody reduced TNF-alpha and increased IFN-alpha secretion by pDCs.	IFN-alpha|3439@9606	TNF-alpha|7124@9606	0.946369
PMID.dPMID11449369.s8.p0	http://www.ncbi.nlm.nih.gov/pubmed/11449369	http://colonet.informatik.hu-berlin.de/geneview/view/abstract/11449369	Unlike IFN-alpha, TNF-alpha is up-regulated in PDC by all CpG ODN tested.	TNF-alpha|7124@9606	IFN-alpha|3439@9606	0.890594
PMID.dPMID8572582.s8.p0	http://www.ncbi.nlm.nih.gov/pubmed/8572582	http://colonet.informatik.hu-berlin.de/geneview/view/abstract/8572582	These findings demonstrate that IFN-alpha, TNF-alpha and FUra have a distinct antitumor effect in combination.	TNF-alpha|7124@9606	IFN-alpha|3439@9606	0.880615
PMC.dPMC21603192.s110.p0	http://www.ncbi.nlm.nih.gov/pubmed/21603192	http://colonet.informatik.hu-berlin.de/geneview/view/abstract/21603192	In particular, a cross-regulation between IFN-alpha and TNF-alpha has been recently proposed, where both cytokines may interact each other to affect the inflammatory responses [].	TNF-alpha|7124@9606	IFN-alpha|3439@9606	0.843425
Sentences between CD14 and TNF
PMID.dPMID10865171.s1.p0	http://www.ncbi.nlm.nih.gov/pubmed/10865171	http://colonet.informatik.hu-berlin.de/geneview/view/abstract/10865171	Ornithine-containing lipids stimulate CD14-dependent TNF-alpha production from murine macrophage-like J774.1 and RAW 264.7 cells.	TNF-alpha|21926@10090	CD14|12475@10090	132546
PMID.dPMID17641010.s1.p0	http://www.ncbi.nlm.nih.gov/pubmed/17641010	http://colonet.informatik.hu-berlin.de/geneview/view/abstract/17641010	TNF-alpha drives human CD14+ monocytes to differentiate into CD70+ dendritic cells evoking Th1 and Th17 responses.	CD14|929@9606	TNF-alpha|7124@9606	101943
PMID.dPMID10024601.s5.p0	http://www.ncbi.nlm.nih.gov/pubmed/10024601	http://colonet.informatik.hu-berlin.de/geneview/view/abstract/10024601	The LPS-stimulated TNF-alpha production from monocytes was found to be CD14 dependent.	CD14|929@9606	TNF-alpha|7124@9606	0.953994
PMID.dPMID11829837.s10.p0	http://www.ncbi.nlm.nih.gov/pubmed/11829837	http://colonet.informatik.hu-berlin.de/geneview/view/abstract/11829837	Positive correlation was found between CD14 mRNA and TNF-alpha mRNA in liver, lung, and kidney tissues.	TNF-alpha|24835@10116	CD14|60350@10116	0.926246
PMID.dPMID12067299.s1.p0	http://www.ncbi.nlm.nih.gov/pubmed/12067299	http://colonet.informatik.hu-berlin.de/geneview/view/abstract/12067299	Human proteinase 3 can inhibits LPS-mediated TNF-alpha production through CD14 degradation: lack of influence of antineutrophil cytoplasmic antibodies.	CD14|929@9606	TNF-alpha|7124@9606	0.847271
PMID.dPMID9353071.s1.p0	http://www.ncbi.nlm.nih.gov/pubmed/9353071	http://colonet.informatik.hu-berlin.de/geneview/view/abstract/9353071	Role of tumor necrosis factor alpha in induction of murine CD14 gene expression by lipopolysaccharide.	CD14|12475@10090	tumor necrosis factor alpha|21926@10090	0.837818
PMID.dPMID15269840.s12.p0	http://www.ncbi.nlm.nih.gov/pubmed/15269840	http://colonet.informatik.hu-berlin.de/geneview/view/abstract/15269840	Our study showed that increased numbers of CD14+CD16+ monocytes are associated with coronary atherosclerosis and TNF-alpha.	TNF-alpha|7124@9606	CD14|929@9606	0.828011
PMID.dPMID7526573.s5.p0	http://www.ncbi.nlm.nih.gov/pubmed/7526573	http://colonet.informatik.hu-berlin.de/geneview/view/abstract/7526573	Monoclonal antibodies against CD14 inhibited TNF-alpha production from monocytes stimulated with neutral-soluble chitosans.	TNF-alpha|7124@9606	CD14|929@9606	0.8194
PMID.dPMID11829837.s12.p5	http://www.ncbi.nlm.nih.gov/pubmed/11829837	http://colonet.informatik.hu-berlin.de/geneview/view/abstract/11829837	Excessive CD14 mRNA expression may enhance synthesis and release of TNF-alpha stimulated by endotoxin translocation, and the interaction between CD14 and TNF-alpha may play an important role in mediating multiple organ damage secondary to major burns.	TNF-alpha|24835@10116	CD14|60350@10116	0.809596
PMID.dPMID7529289.s12.p0	http://www.ncbi.nlm.nih.gov/pubmed/7529289	http://colonet.informatik.hu-berlin.de/geneview/view/abstract/7529289	Additional studies have shown that hMBP that recognizes RGPs prevents, unlike the LPS binding protein, TNF-alpha release by inhibiting the binding of RGPs to CD14 Ag.	CD14|929@9606	TNF-alpha|7124@9606	0.802757
Sentences between TNF and IL17A
PMID.dPMID16275389.s17.p0	http://www.ncbi.nlm.nih.gov/pubmed/16275389	http://colonet.informatik.hu-berlin.de/geneview/view/abstract/16275389	IL-17 might suppress TNF-alpha-induced CCL27 production by inhibiting NF-kappaB through induction of COX-2.	TNF-alpha|7124@9606	IL-17|3605@9606	114189
PMID.dPMID15325020.s8.p0	http://www.ncbi.nlm.nih.gov/pubmed/15325020	http://colonet.informatik.hu-berlin.de/geneview/view/abstract/15325020	We propose that increased vascular IL-17 and TNFalpha levels can act synergistically to create a pro-inflammatory microenvironment promoting the development of atherosclerotic vascular disease.	TNFalpha|7124@9606	IL-17|3605@9606	112609
PMID.dPMID16572447.s11.p0	http://www.ncbi.nlm.nih.gov/pubmed/16572447	http://colonet.informatik.hu-berlin.de/geneview/view/abstract/16572447	IL-17 was synergistic with TNFalpha.	TNFalpha|7124@9606	IL-17|3605@9606	109672
PMID.dPMID12228154.s1.p0	http://www.ncbi.nlm.nih.gov/pubmed/12228154	http://colonet.informatik.hu-berlin.de/geneview/view/abstract/12228154	Interleukin 17 synergises with tumour necrosis factor alpha to induce cartilage destruction in vitro.	tumour necrosis factor alpha|21926@10090	Interleukin 17|16171@10090	101635
PMID.dPMID16311048.s12.p0	http://www.ncbi.nlm.nih.gov/pubmed/16311048	http://colonet.informatik.hu-berlin.de/geneview/view/abstract/16311048	These results suggest that IL-17 is an in vitro stimulator of angiogenic factor release, both by its own action and by cooperating with TNF-alpha.	TNF-alpha|7124@9606	IL-17|3605@9606	0.996837
PMID.dPMID17785852.s12.p0	http://www.ncbi.nlm.nih.gov/pubmed/17785852	http://colonet.informatik.hu-berlin.de/geneview/view/abstract/17785852	Thus, the synergy between TNF-alpha and IL-17 reflects their independent actions on KC gene expression; TNF-alpha serves as a stimulus to initiate transcription through activation of NF-kappaB, whereas IL-17 drives mRNA stabilization through an Act1-dependent pathway.	IL-17|16171@10090	TNF-alpha|21926@10090	0.893244
PMID.dPMID16275389.s1.p0	http://www.ncbi.nlm.nih.gov/pubmed/16275389	http://colonet.informatik.hu-berlin.de/geneview/view/abstract/16275389	IL-17 suppresses TNF-alpha-induced CCL27 production through induction of COX-2 in human keratinocytes.	TNF-alpha|7124@9606	IL-17|3605@9606	0.866432
PMID.dPMID15480342.s1.p0	http://www.ncbi.nlm.nih.gov/pubmed/15480342	http://colonet.informatik.hu-berlin.de/geneview/view/abstract/15480342	IL-17A augments TNF-alpha-induced IL-6 expression in airway smooth muscle by enhancing mRNA stability.	TNF-alpha|7124@9606	IL-17A|3605@9606	0.839902
PMID.dPMID19505724.s1.p0	http://www.ncbi.nlm.nih.gov/pubmed/19505724	http://colonet.informatik.hu-berlin.de/geneview/view/abstract/19505724	Protease-resistant human GAD-derived altered peptide ligands decrease TNF-alpha and IL-17 production in peripheral blood cells from patients with type 1 diabetes mellitus.	IL-17|3605@9606	TNF-alpha|7124@9606	0.827143
PMID.dPMID15325633.s1.p1	http://www.ncbi.nlm.nih.gov/pubmed/15325633	http://colonet.informatik.hu-berlin.de/geneview/view/abstract/15325633	IL-17, IL-1beta and TNF-alpha stimulate VEGF production by dedifferentiated chondrocytes.	TNF-alpha|7124@9606	IL-17|3605@9606	0.813549
Sentences between TNF and EDN1
PMID.dPMID7938900.s8.p0	http://www.ncbi.nlm.nih.gov/pubmed/7938900	http://colonet.informatik.hu-berlin.de/geneview/view/abstract/7938900	Results suggest that TNF-alpha is involved in the production of ET-1 and TM.	ET-1|1906@9606	TNF-alpha|7124@9606	142123
PMID.dPMID15144886.s9.p0	http://www.ncbi.nlm.nih.gov/pubmed/15144886	http://colonet.informatik.hu-berlin.de/geneview/view/abstract/15144886	These results demonstrate for the first time that hONAs secrete ET-1 and that TNF-alpha and hypoxia can regulate its levels.	TNF-alpha|7124@9606	ET-1|1906@9606	118469
PMID.dPMID17074116.s11.p0	http://www.ncbi.nlm.nih.gov/pubmed/17074116	http://colonet.informatik.hu-berlin.de/geneview/view/abstract/17074116	TNFalpha and ET may be involved in the pathogenesis of bee sting poisoning.	ET|1906@9606	TNFalpha|7124@9606	117404
PMID.dPMID12241541.s6.p0	http://www.ncbi.nlm.nih.gov/pubmed/12241541	http://colonet.informatik.hu-berlin.de/geneview/view/abstract/12241541	The details of the interaction between ET-1 and TNF-alpha and the predominant resulting haemodynamic effect in healthy humans are unclear.	TNF-alpha|7124@9606	ET-1|1906@9606	112292
PMID.dPMID12241541.s17.p0	http://www.ncbi.nlm.nih.gov/pubmed/12241541	http://colonet.informatik.hu-berlin.de/geneview/view/abstract/12241541	We thus demonstrate for the first time that local TNF-alpha increases ET-1 spillover from the human forearm and impairs endothelium-dependent vasodilatation.	ET-1|1906@9606	TNF-alpha|7124@9606	0.979044
PMID.dPMID11918129.s8.p0	http://www.ncbi.nlm.nih.gov/pubmed/11918129	http://colonet.informatik.hu-berlin.de/geneview/view/abstract/11918129	ET-1 and TNF-alpha may play pathophysiological roles in the progression of AHF.	TNF-alpha|7124@9606	ET-1|1906@9606	0.93445
PMID.dPMID15928030.s14.p0	http://www.ncbi.nlm.nih.gov/pubmed/15928030	http://colonet.informatik.hu-berlin.de/geneview/view/abstract/15928030	These results suggest an important role for endothelin in mediating TNF-alpha-induced hypertension in pregnant rats.	TNF-alpha|24835@10116	endothelin|24323@10116	0.882381
PMID.dPMID20015663.s13.p0	http://www.ncbi.nlm.nih.gov/pubmed/20015663	http://colonet.informatik.hu-berlin.de/geneview/view/abstract/20015663	The relationship between the increase in vitreous ET-1, TNF-alpha concentrations and HbA(1)c concentration is a important confirmation of the necessity to optimise diabetes treatment.	TNF-alpha|7124@9606	ET-1|1906@9606	0.823803
PMID.dPMID16596276.s7.p0	http://www.ncbi.nlm.nih.gov/pubmed/16596276	http://colonet.informatik.hu-berlin.de/geneview/view/abstract/16596276	We suggested that TNF-alpha can induce ET-1 mRNA expression in NSCLC, similarly to IL-8 expression.	ET-1|1906@9606	TNF-alpha|7124@9606	0.792412
PMID.dPMID7943398.s8.p0	http://www.ncbi.nlm.nih.gov/pubmed/7943398	http://colonet.informatik.hu-berlin.de/geneview/view/abstract/7943398	Our data suggest that endogenous ET-1 may partly contribute to TNF-alpha-induced increases in SVRI and PVRI, against which ET-3, NO, and prostacyclin may function as compensatory vasodilators.	TNF-alpha|7124@9606	ET-1|1906@9606	0.791306
Sentences between TNF and IL13
PMID.dPMID11498676.s9.p0	http://www.ncbi.nlm.nih.gov/pubmed/11498676	http://colonet.informatik.hu-berlin.de/geneview/view/abstract/11498676	Agents that target IL-13 and TNF-alpha remain to be evaluated in asthmatic inflammation.	TNF-alpha|7124@9606	IL-13|3596@9606	146261
PMID.dPMID12775866.s18.p0	http://www.ncbi.nlm.nih.gov/pubmed/12775866	http://colonet.informatik.hu-berlin.de/geneview/view/abstract/12775866	These data suggest that IL-13 might have an anti-inflammatory effect by acting on TNFalpha.	TNFalpha|7124@9606	IL-13|3596@9606	0.965868
PMID.dPMID18341619.s11.p0	http://www.ncbi.nlm.nih.gov/pubmed/18341619	http://colonet.informatik.hu-berlin.de/geneview/view/abstract/18341619	In addition, there appears to be a synergistic effect between the TNF-alpha promoter polymorphism and an IL-13 coding region polymorphism in terms of asthma susceptibility and BHR in this population.	IL-13|3596@9606	TNF-alpha|7124@9606	0.854275
PMID.dPMID10091607.s9.p0	http://www.ncbi.nlm.nih.gov/pubmed/10091607	http://colonet.informatik.hu-berlin.de/geneview/view/abstract/10091607	IL-13 inhibited IL-1 beta/TNF-alpha-elicited PGE2 production, as well as COX-2 protein and mRNA expression in a concentration-dependent fashion.	TNF-alpha|7124@9606	IL-13|3596@9606	0.852606
PMID.dPMID15898987.s6.p0	http://www.ncbi.nlm.nih.gov/pubmed/15898987	http://colonet.informatik.hu-berlin.de/geneview/view/abstract/15898987	We investigated the molecular mechanisms responsible for LPS-induced TNF-alpha and IL-13 production in mast cells.	IL-13|116553@10116	TNF-alpha|24835@10116	0.830412
PMID.dPMID17455319.s6.p0	http://www.ncbi.nlm.nih.gov/pubmed/17455319	http://colonet.informatik.hu-berlin.de/geneview/view/abstract/17455319	In vitro studies further demonstrate that both exogenous and T cell-derived IL-13 can regulate TNFalpha production by macrophages following lipopolysaccharide stimulation.	TNFalpha|21926@10090	IL-13|16163@10090	0.795993
PMID.dPMID15463872.s12.p0	http://www.ncbi.nlm.nih.gov/pubmed/15463872	http://colonet.informatik.hu-berlin.de/geneview/view/abstract/15463872	IL-13 might also compromise host defence by decreasing TNFalpha production.	TNFalpha|7124@9606	IL-13|3596@9606	0.780991
PMID.dPMID11880312.s11.p0	http://www.ncbi.nlm.nih.gov/pubmed/11880312	http://colonet.informatik.hu-berlin.de/geneview/view/abstract/11880312	U-0126 also inhibited IL-13, and TNF-alpha induced mRNA expression.	TNF-alpha|7124@9606	IL-13|3596@9606	0.772139
PMID.dPMID14524254.s6.p9	http://www.ncbi.nlm.nih.gov/pubmed/14524254	http://colonet.informatik.hu-berlin.de/geneview/view/abstract/14524254	The most important cytokines and chemokines are IL-4, IL-5, IL-3, IL-13, GM-CSF and TNF-alpha.	TNF-alpha|7124@9606	IL-13|3596@9606	0.769016
PMID.dPMID15463872.s10.p0	http://www.ncbi.nlm.nih.gov/pubmed/15463872	http://colonet.informatik.hu-berlin.de/geneview/view/abstract/15463872	Addition of IL-13 decreased TNFalpha in PBM culture supernatants.	TNFalpha|7124@9606	IL-13|3596@9606	0.768058
Sentences between TNF and MAPK3
PMID.dPMID9439626.s7.p0	http://www.ncbi.nlm.nih.gov/pubmed/9439626	http://colonet.informatik.hu-berlin.de/geneview/view/abstract/9439626	TNF-alpha increased ERK1 and ERK2 MAPK phosphorylation.	ERK1|50689@10116	TNF-alpha|24835@10116	125732
PMID.dPMID11489936.s10.p0	http://www.ncbi.nlm.nih.gov/pubmed/11489936	http://colonet.informatik.hu-berlin.de/geneview/view/abstract/11489936	Late Erk1/2 activation was involved in TNF-alpha-stimulated NF-kappa B activation and cytokine induction.	TNF-alpha|21926@10090	Erk1|26417@10090	114711
PMC.dPMC18822184.s1.p0	http://www.ncbi.nlm.nih.gov/pubmed/18822184	http://colonet.informatik.hu-berlin.de/geneview/view/abstract/18822184	Hantaviruses and TNF-alpha act synergistically to induce ERK1/2 inactivation in Vero E6 cells	ERK1|5595@9606	TNF-alpha|7124@9606	109663
PMID.dPMID18822184.s1.p0	http://www.ncbi.nlm.nih.gov/pubmed/18822184	http://colonet.informatik.hu-berlin.de/geneview/view/abstract/18822184	Hantaviruses and TNF-alpha act synergistically to induce ERK1/2 inactivation in Vero E6 cells	ERK1|5595@9606	TNF-alpha|7124@9606	109663
PMID.dPMID17575006.s11.p6	http://www.ncbi.nlm.nih.gov/pubmed/17575006	http://colonet.informatik.hu-berlin.de/geneview/view/abstract/17575006	We conclude that TNF-alpha induces MUC1 gene transcription through a TNFR1 --> MEK1/2 --> ERK1 --> Sp1 pathway.	ERK1|5595@9606	TNF-alpha|7124@9606	105724
PMID.dPMID14667793.s9.p0	http://www.ncbi.nlm.nih.gov/pubmed/14667793	http://colonet.informatik.hu-berlin.de/geneview/view/abstract/14667793	These results suggest that ERK1/2 and p38 kinases differentially regulate the M. bovis BCG-mediated induction of TNF-alpha and NOS2 in human monocytes.	TNF-alpha|7124@9606	ERK1|5595@9606	0.893357
PMID.dPMID16141211.s11.p0	http://www.ncbi.nlm.nih.gov/pubmed/16141211	http://colonet.informatik.hu-berlin.de/geneview/view/abstract/16141211	TNFalpha also activated ERK1/2.	ERK1|26417@10090	TNFalpha|21926@10090	0.882052
PMID.dPMID11930247.s13.p0	http://www.ncbi.nlm.nih.gov/pubmed/11930247	http://colonet.informatik.hu-berlin.de/geneview/view/abstract/11930247	It is suggested that rhIL-10 can inhibit TNF-alpha induced VSMC proliferation and phosphorylation of p44/42 MAPK.	p44|50689@10116	TNF-alpha|24835@10116	0.861981
PMID.dPMID16497166.s12.p0	http://www.ncbi.nlm.nih.gov/pubmed/16497166	http://colonet.informatik.hu-berlin.de/geneview/view/abstract/16497166	Taken together, our results indicate that ERK1/2 activity plays a pivotal role in TNF-alpha-induced MMP-9 production and demonstrate its negative modulation by p38 and JNK activity.	TNF-alpha|7124@9606	ERK1|5595@9606	0.835604
PMID.dPMID20564184.s8.p0	http://www.ncbi.nlm.nih.gov/pubmed/20564184	http://colonet.informatik.hu-berlin.de/geneview/view/abstract/20564184	Our results show that TNFalpha was able to induce LIF transcription through ERK1/2 activation in a non-tumorigenic mouse mammary epithelial cell line, SCp2.	ERK1|26417@10090	TNFalpha|21926@10090	0.818309
Sentences between TNF and CCL13
PMID.dPMID19513120.s10.p0	http://www.ncbi.nlm.nih.gov/pubmed/19513120	http://colonet.informatik.hu-berlin.de/geneview/view/abstract/19513120	Moreover, cultured fat pads isolated from ob/ob mice displayed increased Tnf and Ccl2 expression upon exposure to JWH-133.	Ccl2|20296@10090	Tnf|21926@10090	11844
PMC.dPMC19513120.s10.p0	http://www.ncbi.nlm.nih.gov/pubmed/19513120	http://colonet.informatik.hu-berlin.de/geneview/view/abstract/19513120	Moreover, cultured fat pads isolated from ob/ob mice displayed increased Tnf and Ccl2 expression upon exposure to JWH-133.	Ccl2|20296@10090	Tnf|21926@10090	11844
PMID.dPMID16512637.s9.p0	http://www.ncbi.nlm.nih.gov/pubmed/16512637	http://colonet.informatik.hu-berlin.de/geneview/view/abstract/16512637	TNF-alpha and MCP-1 are cytokines which are activated in early stage of sepsis.	MCP-1|24770@10116	TNF-alpha|24835@10116	104386
PMC.dPMC16504008.s119.p0	http://www.ncbi.nlm.nih.gov/pubmed/16504008	http://colonet.informatik.hu-berlin.de/geneview/view/abstract/16504008	Recently, it was reported that primary embryonic fibroblasts from Tnf-/- mice had intact LPS induction of Mcp-1 expression levels [].	Mcp-1|24770@10116	Tnf|21926@10090	0.941187
PMID.dPMID21302491.s1.p0	http://www.ncbi.nlm.nih.gov/pubmed/21302491	http://colonet.informatik.hu-berlin.de/geneview/view/abstract/21302491	[Effects of xiongshao capsule combined with ischemic postconditioning on monocyte chemoattractant protein-1 and tumor necrosis factor-alpha in rat myocardium with ischemic reperfusion injury].	tumor necrosis factor-alpha|24835@10116	monocyte chemoattractant protein-1|24770@10116	0.902659
PMID.dPMID8498530.s1.p0	http://www.ncbi.nlm.nih.gov/pubmed/8498530	http://colonet.informatik.hu-berlin.de/geneview/view/abstract/8498530	LPS-induced MCP-1, IL-1 beta, and TNF-alpha mRNA expression in isolated erythrocyte-perfused rat kidney.	TNF-alpha|24835@10116	MCP-1|24770@10116	0.875608
PMID.dPMID14728822.s7.p0	http://www.ncbi.nlm.nih.gov/pubmed/14728822	http://colonet.informatik.hu-berlin.de/geneview/view/abstract/14728822	MCP-1 and TNF-alpha expression was detected by Western blot and immunohistochemical staining.	TNF-alpha|21926@10090	MCP-1|20296@10090	0.829354
PMID.dPMID14728822.s9.p0	http://www.ncbi.nlm.nih.gov/pubmed/14728822	http://colonet.informatik.hu-berlin.de/geneview/view/abstract/14728822	Cuff placement also induced MCP-1 and TNF-alpha expression in the media and neointima that the VSMCs specifically existed.	TNF-alpha|21926@10090	MCP-1|20296@10090	0.8065
PMID.dPMID19190953.s13.p2	http://www.ncbi.nlm.nih.gov/pubmed/19190953	http://colonet.informatik.hu-berlin.de/geneview/view/abstract/19190953	Indeed, we propose a role for IFN-gamma, TNF-alpha and MCP-1/CCL2 in the mechanical heart remodeling during experimental Chagas' disease.	CCL2|20296@10090	TNF-alpha|21926@10090	0.792574
PMID.dPMID18291098.s1.p0	http://www.ncbi.nlm.nih.gov/pubmed/18291098	http://colonet.informatik.hu-berlin.de/geneview/view/abstract/18291098	Anti-inflammatory effect of resveratrol on TNF-alpha-induced MCP-1 expression in adipocytes.	MCP|20296@10090	TNF-alpha|21926@10090	0.784398
Sentences between TNF and CXCL3
PMC.dPMC16504008.s116.p0	http://www.ncbi.nlm.nih.gov/pubmed/16504008	http://colonet.informatik.hu-berlin.de/geneview/view/abstract/16504008	Our results show that both Mip-2 and Kc are increased in the absence of Tnf.	Tnf|21926@10090	Mip-2|114105@10116	12528
PMID.dPMID10720729.s1.p0	http://www.ncbi.nlm.nih.gov/pubmed/10720729	http://colonet.informatik.hu-berlin.de/geneview/view/abstract/10720729	TNFalpha and MIP-2: role in particle-induced inflammation and regulation by oxidative stress.	MIP-2|114105@10116	TNFalpha|24835@10116	107122
PMID.dPMID11798689.s13.p0	http://www.ncbi.nlm.nih.gov/pubmed/11798689	http://colonet.informatik.hu-berlin.de/geneview/view/abstract/11798689	TNFalpha and MIP-2 may be involved in the process of chemotaxis and activation in airway inflammation in chronic bronchitis.	MIP-2|114105@10116	TNFalpha|24835@10116	104145
PMID.dPMID10502561.s9.p0	http://www.ncbi.nlm.nih.gov/pubmed/10502561	http://colonet.informatik.hu-berlin.de/geneview/view/abstract/10502561	TNF-alpha also induced MIP-2 production from alveolar epithelial cells.	MIP-2|114105@10116	TNF-alpha|24835@10116	0.95624
PMID.dPMID15826373.s7.p0	http://www.ncbi.nlm.nih.gov/pubmed/15826373	http://colonet.informatik.hu-berlin.de/geneview/view/abstract/15826373	When injected into connective tissue of the scalp, purified FimA protein induced TNF-alpha and MIP-2 expression confirming that it is pro-inflammatory.	MIP-2|20310@10090	TNF-alpha|21926@10090	0.939476
PMID.dPMID15937521.s14.p0	http://www.ncbi.nlm.nih.gov/pubmed/15937521	http://colonet.informatik.hu-berlin.de/geneview/view/abstract/15937521	Taken together, our results suggest that MIP-2-induced neutrophil recruitment is mediated by TNF-alpha released from local mast cells.	TNF-alpha|21926@10090	MIP-2|20310@10090	0.938865
PMID.dPMID9277411.s8.p0	http://www.ncbi.nlm.nih.gov/pubmed/9277411	http://colonet.informatik.hu-berlin.de/geneview/view/abstract/9277411	Rats treated with rhIL-11 also showed reduced RMCP II, TNF-alpha, and MIP-2 release in response to toxin A.	MIP-2|114105@10116	TNF-alpha|24835@10116	0.839538
PMID.dPMID18374909.s3.p3	http://www.ncbi.nlm.nih.gov/pubmed/18374909	http://colonet.informatik.hu-berlin.de/geneview/view/abstract/18374909	TNF-alpha, IFN-gamma, IL-4, and MIP-2 are known to be involved in Con A-induced hepatitis.	MIP-2|20310@10090	TNF-alpha|21926@10090	0.784855
PMID.dPMID12807894.s12.p0	http://www.ncbi.nlm.nih.gov/pubmed/12807894	http://colonet.informatik.hu-berlin.de/geneview/view/abstract/12807894	These results demonstrate that high-Vt ventilation in the absence of underlying injury induces intrapulmonary TNF-alpha and MIP-2 expression in mice.	MIP-2|20310@10090	TNF-alpha|21926@10090	0.76443
PMID.dPMID17888421.s1.p0	http://www.ncbi.nlm.nih.gov/pubmed/17888421	http://colonet.informatik.hu-berlin.de/geneview/view/abstract/17888421	Ursodeoxycholic acid protects concanavalin A-induced mouse liver injury through inhibition of intrahepatic tumor necrosis factor-alpha and macrophage inflammatory protein-2 production.	macrophage inflammatory protein-2|20310@10090	tumor necrosis factor-alpha|21926@10090	0.725196
Sentences between TNF and CRP
PMID.dPMID16385373.s19.p0	http://www.ncbi.nlm.nih.gov/pubmed/16385373	http://colonet.informatik.hu-berlin.de/geneview/view/abstract/16385373	Our results indicate that CRP and TNF-alpha might be used as prognostic markers of SARS.	TNF-alpha|7124@9606	CRP|1401@9606	131089
PMID.dPMID16370555.s1.p0	http://www.ncbi.nlm.nih.gov/pubmed/16370555	http://colonet.informatik.hu-berlin.de/geneview/view/abstract/16370555	C-reactive protein and tumor necrosis factor-alpha in gestational hyperglycemia.	tumor necrosis factor-alpha|7124@9606	C-reactive protein|1401@9606	128209
PMID.dPMID19378424.s1.p0	http://www.ncbi.nlm.nih.gov/pubmed/19378424	http://colonet.informatik.hu-berlin.de/geneview/view/abstract/19378424	C-reactive protein and tumor necrosis factor-alpha in relation to insulin-mediated glucose uptake, smoking and atherosclerosis.	tumor necrosis factor-alpha|7124@9606	C-reactive protein|1401@9606	11253
PMID.dPMID17383891.s12.p0	http://www.ncbi.nlm.nih.gov/pubmed/17383891	http://colonet.informatik.hu-berlin.de/geneview/view/abstract/17383891	Resistin levels correlate with CRP and TNF-alpha, even with BMI as a covariate.	TNF-alpha|7124@9606	CRP|1401@9606	0.946021
PMID.dPMID18653160.s1.p1	http://www.ncbi.nlm.nih.gov/pubmed/18653160	http://colonet.informatik.hu-berlin.de/geneview/view/abstract/18653160	Correlations between C-reactive protein, interleukin-6, tumor necrosis factor-alpha and body mass index during senile osteoporosis.	tumor necrosis factor-alpha|7124@9606	C-reactive protein|1401@9606	0.824945
PMID.dPMID14514239.s11.p0	http://www.ncbi.nlm.nih.gov/pubmed/14514239	http://colonet.informatik.hu-berlin.de/geneview/view/abstract/14514239	Elevated levels of CRP and TNF-alpha may be associated with increased risk for future development of atherosclerosis in periodontitis patients.	TNF-alpha|7124@9606	CRP|1401@9606	0.746558
PMID.dPMID15798948.s17.p0	http://www.ncbi.nlm.nih.gov/pubmed/15798948	http://colonet.informatik.hu-berlin.de/geneview/view/abstract/15798948	C-reactive protein levels were related to TNF-alpha and obesity.	TNF-alpha|7124@9606	C-reactive protein|1401@9606	0.715827
PMID.dPMID17448181.s11.p0	http://www.ncbi.nlm.nih.gov/pubmed/17448181	http://colonet.informatik.hu-berlin.de/geneview/view/abstract/17448181	Likewise, recent studies have shown a possible correlation between CRP, TNF-alpha and IL-6 and migraine attacks.	TNF-alpha|7124@9606	CRP|1401@9606	0.705883
PMID.dPMID15589561.s6.p0	http://www.ncbi.nlm.nih.gov/pubmed/15589561	http://colonet.informatik.hu-berlin.de/geneview/view/abstract/15589561	In patients with MI, increased inflammatory markers, such as CRP and TNF-alpha, have been associated with increased cardiovascular events.	TNF-alpha|7124@9606	CRP|1401@9606	0.646078
PMID.dPMID17505829.s12.p0	http://www.ncbi.nlm.nih.gov/pubmed/17505829	http://colonet.informatik.hu-berlin.de/geneview/view/abstract/17505829	Given the close correlation between inflammation and disease progression and the relation between inflammation and CRP, the latter, if used effectively in clinical practice, may be means to identify patients likely to progress rapidly and who require intensive anti-TNFalpha therapy.	TNFalpha|7124@9606	CRP|1401@9606	0.64587
Sentences between TNF and TNFSF11
PMID.dPMID18305398.s4.p0	http://www.ncbi.nlm.nih.gov/pubmed/18305398	http://colonet.informatik.hu-berlin.de/geneview/view/abstract/18305398	It reduces reactive oxygen species produced by RANKL and its inhibitory effect results from reduced levels of TNF-alpha.	TNF-alpha|21926@10090	RANKL|21943@10090	120213
PMID.dPMID15389596.s13.p0	http://www.ncbi.nlm.nih.gov/pubmed/15389596	http://colonet.informatik.hu-berlin.de/geneview/view/abstract/15389596	Gliotoxin, known for its ability to inhibit NF-kappaB activation blocked RANKL-induced TNF-alpha expression.	TNF-alpha|21926@10090	RANKL|21943@10090	119839
PMID.dPMID17467668.s9.p0	http://www.ncbi.nlm.nih.gov/pubmed/17467668	http://colonet.informatik.hu-berlin.de/geneview/view/abstract/17467668	These results indicate that TNFalpha is induced by RANKL in pOCs and serves as an autocrine factor promoting osteoclastogenesis through c-Fos and NFATc1 activation.	RANKL|21943@10090	TNFalpha|21926@10090	116667
PMID.dPMID17467668.s1.p0	http://www.ncbi.nlm.nih.gov/pubmed/17467668	http://colonet.informatik.hu-berlin.de/geneview/view/abstract/17467668	RANKL-stimulated TNFalpha production in osteoclast precursor cells promotes osteoclastogenesis by modulating RANK signaling pathways.	TNFalpha|21926@10090	RANKL|21943@10090	110535
PMID.dPMID16734568.s9.p0	http://www.ncbi.nlm.nih.gov/pubmed/16734568	http://colonet.informatik.hu-berlin.de/geneview/view/abstract/16734568	TNF-alpha upregulated M-CSF and RANKL in HPDL cells.	RANKL|8600@9606	TNF-alpha|7124@9606	107434
PMID.dPMID15935726.s9.p0	http://www.ncbi.nlm.nih.gov/pubmed/15935726	http://colonet.informatik.hu-berlin.de/geneview/view/abstract/15935726	These results suggested that ameloblastoma by secreting RANKL and TNFalpha could induce osteoclastogenesis.	TNFalpha|7124@9606	RANKL|8600@9606	106807
PMID.dPMID19728295.s14.p0	http://www.ncbi.nlm.nih.gov/pubmed/19728295	http://colonet.informatik.hu-berlin.de/geneview/view/abstract/19728295	TNF-alpha and RANKL synergistically induced osteoclastogenesis.	RANKL|8600@9606	TNF-alpha|7124@9606	105076
PMID.dPMID15823554.s8.p0	http://www.ncbi.nlm.nih.gov/pubmed/15823554	http://colonet.informatik.hu-berlin.de/geneview/view/abstract/15823554	The osteoclast differentiation induced by TNF-alpha was independent of RANKL binding to its receptor RANK on PBMCs.	RANKL|8600@9606	TNF-alpha|7124@9606	0.974784
PMID.dPMID11861538.s6.p0	http://www.ncbi.nlm.nih.gov/pubmed/11861538	http://colonet.informatik.hu-berlin.de/geneview/view/abstract/11861538	TNFalpha was equipotent with RANKL for this action.	RANKL|117516@10116	TNFalpha|24835@10116	0.961738
PMID.dPMID17370327.s1.p0	http://www.ncbi.nlm.nih.gov/pubmed/17370327	http://colonet.informatik.hu-berlin.de/geneview/view/abstract/17370327	Lymphocytes and synovial fluid fibroblasts support osteoclastogenesis through RANKL, TNFalpha, and IL-7 in an in vitro model derived from human psoriatic arthritis.	TNFalpha|7124@9606	RANKL|8600@9606	0.890367
Sentences between TNF and IL5
PMID.dPMID20460123.s8.p0	http://www.ncbi.nlm.nih.gov/pubmed/20460123	http://colonet.informatik.hu-berlin.de/geneview/view/abstract/20460123	IL-5 and TNF-alpha were increased in both significantly.	TNF-alpha|21926@10090	IL-5|16191@10090	109143
PMID.dPMID11428741.s15.p0	http://www.ncbi.nlm.nih.gov/pubmed/11428741	http://colonet.informatik.hu-berlin.de/geneview/view/abstract/11428741	Antigen stimulation increased TNF-alpha and IL-5 protein production and mRNA expression.	IL-5|3567@9606	TNF-alpha|7124@9606	105571
PMID.dPMID18782324.s12.p0	http://www.ncbi.nlm.nih.gov/pubmed/18782324	http://colonet.informatik.hu-berlin.de/geneview/view/abstract/18782324	Taken together, the present results suggest that T cells bearing these TCRs are involved in the pathogenesis of OLP, and that IL-5 and TNF-alpha may participate in its inflammatory process.	TNF-alpha|7124@9606	IL-5|3567@9606	0.94595
PMID.dPMID9482700.s13.p0	http://www.ncbi.nlm.nih.gov/pubmed/9482700	http://colonet.informatik.hu-berlin.de/geneview/view/abstract/9482700	As for IL-5, TNF-alpha changes eosinophil phenotype from a resting to an activated state.	TNF-alpha|7124@9606	IL-5|3567@9606	0.845025
PMID.dPMID11575456.s1.p0	http://www.ncbi.nlm.nih.gov/pubmed/11575456	http://colonet.informatik.hu-berlin.de/geneview/view/abstract/11575456	IL-5 and TNF-alpha participate in recruitment of eosinophils to intestinal mucosa in ulcerative colitis.	TNF-alpha|7124@9606	IL-5|3567@9606	0.842137
PMID.dPMID10979216.s10.p0	http://www.ncbi.nlm.nih.gov/pubmed/10979216	http://colonet.informatik.hu-berlin.de/geneview/view/abstract/10979216	An association of acute GVHD was less prominent with TNF-alpha than with IL-5 in our study.	IL-5|3567@9606	TNF-alpha|7124@9606	0.811931
PMID.dPMID15230810.s9.p28	http://www.ncbi.nlm.nih.gov/pubmed/15230810	http://colonet.informatik.hu-berlin.de/geneview/view/abstract/15230810	Some of the most important eosinophil chemoattractant cytokines are IL-5, IL-8, RANTES, eotaxin, eotaxin-2, eotaxin-3, MCP-3, MCP-4 and TNF-alpha.	TNF-alpha|7124@9606	IL-5|3567@9606	0.729373
PMID.dPMID17013434.s7.p0	http://www.ncbi.nlm.nih.gov/pubmed/17013434	http://colonet.informatik.hu-berlin.de/geneview/view/abstract/17013434	It has been demonstrated that thalidomide inhibits TNFalpha, IL-5, IL-6, IL-8, IL-12 production and increases production of IL-2, IL-10 and INFgamma.	IL-5|3567@9606	TNFalpha|7124@9606	0.720866
PMID.dPMID9498780.s1.p4	http://www.ncbi.nlm.nih.gov/pubmed/9498780	http://colonet.informatik.hu-berlin.de/geneview/view/abstract/9498780	Type 1- and type 2-like lesional skin-derived Mycobacterium leprae-responsive T cell clones are characterized by coexpression of IFN-gamma/TNF-alpha and IL-4/IL-5/IL-13, respectively.	IL-5|3567@9606	TNF-alpha|7124@9606	0.703815
PMID.dPMID9551981.s1.p0	http://www.ncbi.nlm.nih.gov/pubmed/9551981	http://colonet.informatik.hu-berlin.de/geneview/view/abstract/9551981	Common and distinct signaling pathways mediate the induction of TNF-alpha and IL-5 in IgE plus antigen-stimulated mast cells.	IL-5|16191@10090	TNF-alpha|21926@10090	0.682814
Sentences between TNF and PTGS2
PMID.dPMID14769925.s6.p0	http://www.ncbi.nlm.nih.gov/pubmed/14769925	http://colonet.informatik.hu-berlin.de/geneview/view/abstract/14769925	Peritoneal macrophages derived from all three genotypes overexpress cyclooxygenase 2 and TNF-alpha.	TNF-alpha|21926@10090	cyclooxygenase 2|19225@10090	116067
PMID.dPMID10736244.s13.p0	http://www.ncbi.nlm.nih.gov/pubmed/10736244	http://colonet.informatik.hu-berlin.de/geneview/view/abstract/10736244	TNF-alpha increased PG output and PGHS-2 expression independent of cell type.	PGHS-2|5743@9606	TNF-alpha|7124@9606	109176
PMID.dPMID17963953.s10.p0	http://www.ncbi.nlm.nih.gov/pubmed/17963953	http://colonet.informatik.hu-berlin.de/geneview/view/abstract/17963953	In conclusion, there appears to be a positive feedback regulation between TNF-alpha and COX-2-dependent PGE2 during LPS-induced inflammatory reactions.	COX-2|19225@10090	TNF-alpha|21926@10090	0.934809
PMID.dPMID9576062.s5.p2	http://www.ncbi.nlm.nih.gov/pubmed/9576062	http://colonet.informatik.hu-berlin.de/geneview/view/abstract/9576062	TNF-alpha-induced PGE2 production was evident after 12 h and was associated with a significant TNF-alpha-mediated increase in PGHS-2 immunoreactive protein.	PGHS-2|19225@10090	TNF-alpha|21926@10090	0.909864
PMID.dPMID18067784.s8.p0	http://www.ncbi.nlm.nih.gov/pubmed/18067784	http://colonet.informatik.hu-berlin.de/geneview/view/abstract/18067784	The petroleum ether fraction, ethyl acetate fraction and n-butanol fraction of ethanol extract could inhibit the production of TNF-alpha mRNA, COX-2 mRNA and NF-kappaB to some extent.	COX-2|19225@10090	TNF-alpha|21926@10090	0.873114
PMID.dPMID19126304.s1.p0	http://www.ncbi.nlm.nih.gov/pubmed/19126304	http://colonet.informatik.hu-berlin.de/geneview/view/abstract/19126304	Effect of natsudaidain isolated from Citrus plants on TNF-alpha and cyclooxygenase-2 expression in RBL-2H3 cells.	cyclooxygenase-2|29527@10116	TNF-alpha|24835@10116	0.862056
PMID.dPMID11162356.s7.p0	http://www.ncbi.nlm.nih.gov/pubmed/11162356	http://colonet.informatik.hu-berlin.de/geneview/view/abstract/11162356	We demonstrated that challenge of ED(27)cells with TNF-alpha caused binding of the NF-kappaB complex to its kappaB site followed by increased accumulation of COX-2 transcripts.	COX-2|5743@9606	TNF-alpha|7124@9606	0.857235
PMID.dPMID15022726.s15.p0	http://www.ncbi.nlm.nih.gov/pubmed/15022726	http://colonet.informatik.hu-berlin.de/geneview/view/abstract/15022726	The mRNA levels for COX-2 and TNF-alpha significantly increased in I/R group and Trolox also attenuated this increase.	TNF-alpha|24835@10116	COX-2|29527@10116	0.823671
PMID.dPMID20122965.s10.p0	http://www.ncbi.nlm.nih.gov/pubmed/20122965	http://colonet.informatik.hu-berlin.de/geneview/view/abstract/20122965	Pharmacological studies revealed that COX-2 is involved in the cognitive impairment mediated by TNF-alpha.	TNF-alpha|21926@10090	COX-2|19225@10090	0.82322
PMID.dPMID19140872.s1.p0	http://www.ncbi.nlm.nih.gov/pubmed/19140872	http://colonet.informatik.hu-berlin.de/geneview/view/abstract/19140872	Inhibition of TNF-alpha-induced cyclooxygenase-2 expression by Mycobacterium bovis BCG in human alveolar epithelial A549 cells.	cyclooxygenase-2|5743@9606	TNF-alpha|7124@9606	0.802799
Sentences between TNF and KIAA0101
PMID.dPMID8536380.s14.p0	http://www.ncbi.nlm.nih.gov/pubmed/8536380	http://colonet.informatik.hu-berlin.de/geneview/view/abstract/8536380	Our results indicate that PAF and TNF-alpha could be implicated in the pathogenesis of nephrosis through the inhibition of proteoglycan synthesis by glomerular epithelial cells.	TNF-alpha|24835@10116	PAF|300795@10116	132581
PMID.dPMID7930608.s9.p0	http://www.ncbi.nlm.nih.gov/pubmed/7930608	http://colonet.informatik.hu-berlin.de/geneview/view/abstract/7930608	We hypothesize that PAF acts at the transcriptional level to increase TNF-alpha RNA, but a post-transcriptional block acts to regulate protein production.	TNF-alpha|7124@9606	PAF|9768@9606	118251
PMID.dPMID7648718.s4.p0	http://www.ncbi.nlm.nih.gov/pubmed/7648718	http://colonet.informatik.hu-berlin.de/geneview/view/abstract/7648718	Glomerular PAF, TNF-alpha and FN production were increased in rats with nephritis.	TNF-alpha|24835@10116	PAF|300795@10116	103408
PMID.dPMID7930608.s10.p0	http://www.ncbi.nlm.nih.gov/pubmed/7930608	http://colonet.informatik.hu-berlin.de/geneview/view/abstract/7930608	We also report that PAF enhances PMA-induced TNF-alpha production from human peripheral B cells.	TNF-alpha|7124@9606	PAF|9768@9606	100055
PMID.dPMID1932101.s12.p0	http://www.ncbi.nlm.nih.gov/pubmed/1932101	http://colonet.informatik.hu-berlin.de/geneview/view/abstract/1932101	It is concluded that PAF and TNF-alpha can increase hepatic lipogenesis in vivo in the absence of adrenal hormones and in the presence of a low plasma insulin.	TNF-alpha|24835@10116	PAF|300795@10116	0.952816
PMID.dPMID8315901.s8.p0	http://www.ncbi.nlm.nih.gov/pubmed/8315901	http://colonet.informatik.hu-berlin.de/geneview/view/abstract/8315901	However the existence of PAF and TNF-alpha in the BALF of some ARDS patients suggests that they might play a role in the pathogenesis of ARDS.	TNF-alpha|7124@9606	PAF|9768@9606	0.869525
PMID.dPMID9746596.s15.p0	http://www.ncbi.nlm.nih.gov/pubmed/9746596	http://colonet.informatik.hu-berlin.de/geneview/view/abstract/9746596	In addition, prostaglandins, PAF, and TNF-alpha are involved in the release of the ISF.	TNF-alpha|7124@9606	PAF|9768@9606	0.8182
PMID.dPMID9157962.s12.p0	http://www.ncbi.nlm.nih.gov/pubmed/9157962	http://colonet.informatik.hu-berlin.de/geneview/view/abstract/9157962	These findings indicate that both PAF and oxLDL have the capacity to induce TNF-alpha, which may increase atherogenesis due to its pleiotropic proinflammatory effects.	TNF-alpha|7124@9606	PAF|9768@9606	0.807169
PMID.dPMID8799203.s1.p0	http://www.ncbi.nlm.nih.gov/pubmed/8799203	http://colonet.informatik.hu-berlin.de/geneview/view/abstract/8799203	Toxicity of TNF alpha and platelet activating factor for human NT2N neurons: a tissue culture model for human immunodeficiency virus dementia.	platelet activating factor|9768@9606	TNF alpha|7124@9606	0.776792
PMID.dPMID11056009.s11.p0	http://www.ncbi.nlm.nih.gov/pubmed/11056009	http://colonet.informatik.hu-berlin.de/geneview/view/abstract/11056009	The direct comparison between the two different protocols showed a slower decrease of PAF responsiveness induced by TNFalpha than by LPS.	TNFalpha|7124@9606	PAF|9768@9606	0.77471
Sentences between TNF and TLR2
PMC.dPMC22162948.s206.p0	http://www.ncbi.nlm.nih.gov/pubmed/22162948	http://colonet.informatik.hu-berlin.de/geneview/view/abstract/22162948	These results indicate that TLR2 is involved in the second wave of TNFalpha expression after LPS and that there is an elegant cooperation between TLR2 and TLR4 .	TNFalpha|21926@10090	TLR2|24088@10090	133913
PMID.dPMID14634135.s6.p0	http://www.ncbi.nlm.nih.gov/pubmed/14634135	http://colonet.informatik.hu-berlin.de/geneview/view/abstract/14634135	Macrophages lacking TLR2 produced significantly less TNF-alpha and IL6 in response to active infection.	TNF-alpha|21926@10090	TLR2|24088@10090	105403
PMID.dPMID11868369.s8.p0	http://www.ncbi.nlm.nih.gov/pubmed/11868369	http://colonet.informatik.hu-berlin.de/geneview/view/abstract/11868369	In addition, this protein has been revealed to function as a negative regulator against PGN-induced TNF-alpha secretion from macrophages through direct interaction with TLR2.	TLR2|24088@10090	TNF-alpha|21926@10090	0.994848
PMID.dPMID12817025.s14.p10	http://www.ncbi.nlm.nih.gov/pubmed/12817025	http://colonet.informatik.hu-berlin.de/geneview/view/abstract/12817025	From these results, we conclude that 1) TLR2 directly binds zymosan, 2) SP-A can alter zymosan-TLR2 interaction, and 3) SP-A down-regulates TLR2-mediated signaling and TNF-alpha secretion stimulated by zymosan.	TNF-alpha|7124@9606	TLR2|7097@9606	0.974633
PMID.dPMID10865188.s14.p0	http://www.ncbi.nlm.nih.gov/pubmed/10865188	http://colonet.informatik.hu-berlin.de/geneview/view/abstract/10865188	TLR-2 mRNA was up-regulated by TNF-alpha.	TNF-alpha|7124@9606	TLR-2|7097@9606	0.964167
PMID.dPMID17266936.s9.p1	http://www.ncbi.nlm.nih.gov/pubmed/17266936	http://colonet.informatik.hu-berlin.de/geneview/view/abstract/17266936	These results indicate that TLR2/TNFalpha-adipocytes possibly cause the induction of TNFalpha expression in visceral fat tissues, being associated with the development of high fat-induced insulin resistance.	TNFalpha|21926@10090	TLR2|24088@10090	0.904796
PMID.dPMID12817025.s14.p14	http://www.ncbi.nlm.nih.gov/pubmed/12817025	http://colonet.informatik.hu-berlin.de/geneview/view/abstract/12817025	From these results, we conclude that 1) TLR2 directly binds zymosan, 2) SP-A can alter zymosan-TLR2 interaction, and 3) SP-A down-regulates TLR2-mediated signaling and TNF-alpha secretion stimulated by zymosan.	TNF-alpha|7124@9606	TLR2|7097@9606	0.854139
PMID.dPMID18768838.s10.p0	http://www.ncbi.nlm.nih.gov/pubmed/18768838	http://colonet.informatik.hu-berlin.de/geneview/view/abstract/18768838	In addition, NF-kappaB inhibitors attenuated TNF-alpha-induced TLR2 expression in astrocytes.	TLR2|24088@10090	TNF-alpha|21926@10090	0.842982
PMID.dPMID19541650.s11.p0	http://www.ncbi.nlm.nih.gov/pubmed/19541650	http://colonet.informatik.hu-berlin.de/geneview/view/abstract/19541650	However, in BMMPhi from DIO mice, TLR2 can no longer inhibit the TNF-alpha-induced increase in CTMP caused by P. gingivalis challenge.	TNF-alpha|21926@10090	TLR2|24088@10090	0.797255
PMID.dPMID17266936.s8.p0	http://www.ncbi.nlm.nih.gov/pubmed/17266936	http://colonet.informatik.hu-berlin.de/geneview/view/abstract/17266936	Free fatty acids increased TNFalpha expression in 3T3-L1 adipocytes through TLR2 signals.	TLR2|24088@10090	TNFalpha|21926@10090	0.780944
Sentences between TNF and FASLG
PMID.dPMID9499803.s8.p0	http://www.ncbi.nlm.nih.gov/pubmed/9499803	http://colonet.informatik.hu-berlin.de/geneview/view/abstract/9499803	Finally, our data suggest that FasL and TNF alpha could both participate in the killing process.	TNF alpha|7124@9606	FasL|356@9606	121301
PMID.dPMID12242079.s9.p0	http://www.ncbi.nlm.nih.gov/pubmed/12242079	http://colonet.informatik.hu-berlin.de/geneview/view/abstract/12242079	Semi-quantitative RT-PCR demonstrated that IL-12 was able to up-regulate TNF-alpha and FasL mRNA expression.	FasL|356@9606	TNF-alpha|7124@9606	108318
PMID.dPMID10841072.s4.p0	http://www.ncbi.nlm.nih.gov/pubmed/10841072	http://colonet.informatik.hu-berlin.de/geneview/view/abstract/10841072	TNF-alpha and FasL induce their respective receptors and then activate caspase enzymes that are critically involved in the apoptotic process.	FasL|14103@10090	TNF-alpha|21926@10090	0.958203
PMID.dPMID10689104.s5.p0	http://www.ncbi.nlm.nih.gov/pubmed/10689104	http://colonet.informatik.hu-berlin.de/geneview/view/abstract/10689104	It was observed that the interaction of FasL and TNFalpha with their respective receptors could trigger apoptosis in thymocytes.	TNFalpha|21926@10090	FasL|14103@10090	0.930968
PMID.dPMID17240413.s8.p2	http://www.ncbi.nlm.nih.gov/pubmed/17240413	http://colonet.informatik.hu-berlin.de/geneview/view/abstract/17240413	Thus, TRAIL has clearly distinguished itself from the other family members including TNF-alpha and FasL both of which could not make it to the clinic due to their toxic nature.	FasL|356@9606	TNF-alpha|7124@9606	0.856957
PMID.dPMID17258890.s9.p0	http://www.ncbi.nlm.nih.gov/pubmed/17258890	http://colonet.informatik.hu-berlin.de/geneview/view/abstract/17258890	Altogether, our results suggest that TNFalpha- and FasL-stimulated AML cell lytic induction is regulated by a signalling pathway involving sequentially, ROS generation, Trx oxidation, ASK1 activation, p38MAPK stimulation and GrB induction at mRNA and protein levels.	FasL|14103@10090	TNFalpha|21926@10090	0.839581
PMID.dPMID11549697.s1.p0	http://www.ncbi.nlm.nih.gov/pubmed/11549697	http://colonet.informatik.hu-berlin.de/geneview/view/abstract/11549697	TNFalpha down-regulates the Fas ligand and inhibits germ cell apoptosis in the human testis.	Fas ligand|356@9606	TNFalpha|7124@9606	0.829583
PMID.dPMID11261545.s14.p0	http://www.ncbi.nlm.nih.gov/pubmed/11261545	http://colonet.informatik.hu-berlin.de/geneview/view/abstract/11261545	Our results suggest that CD95L, similarly to TNF-alpha, is able to reveal its cytotoxic activity in a receptor-independent manner and this activity strongly depends on pH of the environment.	TNF-alpha|7124@9606	CD95L|356@9606	0.824091
PMID.dPMID10858244.s9.p1	http://www.ncbi.nlm.nih.gov/pubmed/10858244	http://colonet.informatik.hu-berlin.de/geneview/view/abstract/10858244	Together, these results suggest that TNF-alpha and Fas-FasL interactions play a role in the activation-induced cell death (AICD) process associated with a defect in T-cell proliferation of the susceptible C57BL/6 mice.	FasL|14103@10090	TNF-alpha|21926@10090	0.799333
PMID.dPMID10792950.s18.p0	http://www.ncbi.nlm.nih.gov/pubmed/10792950	http://colonet.informatik.hu-berlin.de/geneview/view/abstract/10792950	Chang hepatocytes grown in the coculture conditioned media have an increase in TNF-alpha and Fas ligand.	Fas ligand|356@9606	TNF-alpha|7124@9606	0.798386
Sentences between TP53 and TNF
PMID.dPMID10773886.s13.p0	http://www.ncbi.nlm.nih.gov/pubmed/10773886	http://colonet.informatik.hu-berlin.de/geneview/view/abstract/10773886	In summary, these results indicate that p53 is involved in TNF-alpha-mediated apoptosis in LNCaP.	TNF-alpha|21926@10090	p53|22059@10090	136219
PMID.dPMID15681814.s8.p0	http://www.ncbi.nlm.nih.gov/pubmed/15681814	http://colonet.informatik.hu-berlin.de/geneview/view/abstract/15681814	Such targets include TNF-alpha, p53, and GLP-1 receptor.	p53|7157@9606	TNF-alpha|7124@9606	121185
PMID.dPMID10773886.s5.p0	http://www.ncbi.nlm.nih.gov/pubmed/10773886	http://colonet.informatik.hu-berlin.de/geneview/view/abstract/10773886	P53 inactivation in LN-56 was associated with an increased resistance to apoptosis induced by TNF-alpha.	TNF-alpha|7124@9606	P53|7157@9606	0.879465
PMID.dPMID12165799.s1.p0	http://www.ncbi.nlm.nih.gov/pubmed/12165799	http://colonet.informatik.hu-berlin.de/geneview/view/abstract/12165799	TNFalpha induces acetylation of p53 but attenuates its transcriptional activation in rheumatoid synoviocytes.	p53|7157@9606	TNFalpha|7124@9606	0.8787
PMID.dPMID19136059.s6.p0	http://www.ncbi.nlm.nih.gov/pubmed/19136059	http://colonet.informatik.hu-berlin.de/geneview/view/abstract/19136059	However, TNF-alpha/CHX-mediated apoptosis was independent of p53 protein levels and phosphorylation.	p53|24842@10116	TNF-alpha|24835@10116	0.865793
PMID.dPMID12189181.s12.p0	http://www.ncbi.nlm.nih.gov/pubmed/12189181	http://colonet.informatik.hu-berlin.de/geneview/view/abstract/12189181	Taken together, these results suggest that TNF-alpha and TRAIL potentiate the cadmium-mediated cell death via distinct p53 expression patterns.	p53|22059@10090	TNF-alpha|21926@10090	0.847414
PMID.dPMID17599062.s8.p1	http://www.ncbi.nlm.nih.gov/pubmed/17599062	http://colonet.informatik.hu-berlin.de/geneview/view/abstract/17599062	We also demonstrate that TNF-alpha is upregulated in response to p53 and p53 inducing genotoxic stress, in a CDIP-dependent manner.	p53|7157@9606	TNF-alpha|7124@9606	0.813142
PMID.dPMID17599062.s8.p0	http://www.ncbi.nlm.nih.gov/pubmed/17599062	http://colonet.informatik.hu-berlin.de/geneview/view/abstract/17599062	We also demonstrate that TNF-alpha is upregulated in response to p53 and p53 inducing genotoxic stress, in a CDIP-dependent manner.	p53|7157@9606	TNF-alpha|7124@9606	0.81052
PMID.dPMID18796294.s9.p0	http://www.ncbi.nlm.nih.gov/pubmed/18796294	http://colonet.informatik.hu-berlin.de/geneview/view/abstract/18796294	In conclusion, these results demonstrate that TNFalpha-induced MAPKs mediate p53 activation in apoptotic and autophagic cell death, as well as autophagy may amplify apoptosis when associated with a death signaling pathway.	p53|22059@10090	TNFalpha|21926@10090	0.768188
PMID.dPMID21541574.s14.p0	http://www.ncbi.nlm.nih.gov/pubmed/21541574	http://colonet.informatik.hu-berlin.de/geneview/view/abstract/21541574	We conclude that TNF-alpha can activate human wild-type p53 in NSCLC cells by a post-translational mechanism.	p53|7157@9606	TNF-alpha|7124@9606	0.751964
Interactions for RORB(6096)
Sentences between RORB and RORA
PMC.dPMC19909500.s154.p0	http://www.ncbi.nlm.nih.gov/pubmed/19909500	http://colonet.informatik.hu-berlin.de/geneview/view/abstract/19909500	This table contains the results of the quantitative trait association analyses of RORA and RORB SNPs with age-at-onset of bipolar disorder.	RORB|225998@10090	RORA|19883@10090	0.771526
PMC.dPMC18454201.s65.p0	http://www.ncbi.nlm.nih.gov/pubmed/18454201	http://colonet.informatik.hu-berlin.de/geneview/view/abstract/18454201	RorcÔêÆ/ÔêÆ Mice Display Normal Circadian Rhythms Rora and Rorb have been characterized as clock components, functioning to regulate Bmal1 expression in the SCN () ,,,.	Rorb|225998@10090	Rora|19883@10090	0.69585
PMC.dPMC19909500.s151.p0	http://www.ncbi.nlm.nih.gov/pubmed/19909500	http://colonet.informatik.hu-berlin.de/geneview/view/abstract/19909500	Supplementary Material Additional file 2 Association results for all analyzed RORA and RORB SNPs.	RORB|225998@10090	RORA|19883@10090	0.667201
PMC.dPMC19909500.s152.p0	http://www.ncbi.nlm.nih.gov/pubmed/19909500	http://colonet.informatik.hu-berlin.de/geneview/view/abstract/19909500	This table details the association results for all RORA and RORB SNPs analyzed and includes results from both case-control and family-based samples.	RORB|225998@10090	RORA|19883@10090	0.656273
PMC.dPMC20195522.s92.p2	http://www.ncbi.nlm.nih.gov/pubmed/20195522	http://colonet.informatik.hu-berlin.de/geneview/view/abstract/20195522	Moreover, ARNTL, RORA, RORB and RXRG were associated with bipolar disorder in a meta-analysis integrating data from genome-wide association studies and human and animal model expression studies .	RORB|6096@9606	RORA|6095@9606	0.449091
PMC.dPMC20856823.s97.p2	http://www.ncbi.nlm.nih.gov/pubmed/20856823	http://colonet.informatik.hu-berlin.de/geneview/view/abstract/20856823	Moreover, ARNTL, RORA, RORB and RXRG were associated with bipolar disorder in a meta-analysis integrating data from genome-wide association studies and human and animal model expression studies , .	RORB|6096@9606	RORA|6095@9606	0.410614
PMC.dPMC19909500.s34.p0	http://www.ncbi.nlm.nih.gov/pubmed/19909500	http://colonet.informatik.hu-berlin.de/geneview/view/abstract/19909500	Like RORA, RORB expression is known to change as a function of circadian rhythm in some tissues, and RORB -/- mice exhibit circadian rhythm abnormalities.	RORB|225998@10090	RORA|19883@10090	0.332788
PMC.dPMC19909500.s28.p0	http://www.ncbi.nlm.nih.gov/pubmed/19909500	http://colonet.informatik.hu-berlin.de/geneview/view/abstract/19909500	Both RORA and RORB expression was increased in the amygdala and decreased in the pre-frontal cortex in DBP KO non-stressed, depressed-like mice.	RORB|225998@10090	RORA|19883@10090	0.31981
PMC.dPMC18454201.s40.p2	http://www.ncbi.nlm.nih.gov/pubmed/18454201	http://colonet.informatik.hu-berlin.de/geneview/view/abstract/18454201	As deletion of Rev-erb╬▒, Rora or Rorb results in a broader distribution of circadian period lengths, it was suggested that the ROR/REV/Bmal1 loop serves as a stabilizing mechanism ÔÇô,.	Rorb|225998@10090	Rora|19883@10090	0.247328
PMC.dPMC18846204.s183.p5	http://www.ncbi.nlm.nih.gov/pubmed/18846204	http://colonet.informatik.hu-berlin.de/geneview/view/abstract/18846204	Among the seven DBOX controlled genes identified by Ueda et al., Nr1d1, Nr1d2, Rora, Rorb, Per1, Per2, and Per3, we only identified Per3.	Rorb|225998@10090	Rora|19883@10090	0.179589
Sentences between GRM2 and RORB
PMC.dPMC16184189.s162.p0	http://www.ncbi.nlm.nih.gov/pubmed/16184189	http://colonet.informatik.hu-berlin.de/geneview/view/abstract/16184189	Rorb and Grm2 analysis.	Grm2|108068@10090	Rorb|225998@10090	135905
PMC.dPMC16184189.s215.p0	http://www.ncbi.nlm.nih.gov/pubmed/16184189	http://colonet.informatik.hu-berlin.de/geneview/view/abstract/16184189	Rorb and Grm2 were two of the top matches returned.	Grm2|108068@10090	Rorb|225998@10090	0.665061
PMC.dPMC16184189.s221.p0	http://www.ncbi.nlm.nih.gov/pubmed/16184189	http://colonet.informatik.hu-berlin.de/geneview/view/abstract/16184189	(C) Quantification of Grm2 expression in somatosensory cortex layer IV as described for Rorb showed no difference in expression strength distribution between control and brl.	Rorb|225998@10090	Grm2|108068@10090	0.323069
PMC.dPMC16184189.s82.p5	http://www.ncbi.nlm.nih.gov/pubmed/16184189	http://colonet.informatik.hu-berlin.de/geneview/view/abstract/16184189	Three pairs of P7 brains from brl mutants and their heterozygous littermate controls (possessing intact barrel maps) were subjected simultaneously to robotic ISH using Rorb and Grm2 riboprobes.	Grm2|108068@10090	Rorb|225998@10090	0.189847
PMC.dPMC16184189.s223.p0	http://www.ncbi.nlm.nih.gov/pubmed/16184189	http://colonet.informatik.hu-berlin.de/geneview/view/abstract/16184189	However, a significant decrease in the percentage of strongly expressing cells was found for Rorb in brl (p = 0.02), but not for Grm2 (p = 0.8). (E) The somatosensory cortex containing the barrel region was dissected as indicated (highlighted and boxed) and used for quantitative real-time PCR analysis.	Grm2|108068@10090	Rorb|225998@10090	0.014127
Sentences between ARNTL and RORB
PMC.dPMC20195522.s92.p1	http://www.ncbi.nlm.nih.gov/pubmed/20195522	http://colonet.informatik.hu-berlin.de/geneview/view/abstract/20195522	Moreover, ARNTL, RORA, RORB and RXRG were associated with bipolar disorder in a meta-analysis integrating data from genome-wide association studies and human and animal model expression studies .	RORB|6096@9606	ARNTL|406@9606	0.458627
PMC.dPMC20856823.s97.p1	http://www.ncbi.nlm.nih.gov/pubmed/20856823	http://colonet.informatik.hu-berlin.de/geneview/view/abstract/20856823	Moreover, ARNTL, RORA, RORB and RXRG were associated with bipolar disorder in a meta-analysis integrating data from genome-wide association studies and human and animal model expression studies , .	RORB|6096@9606	ARNTL|406@9606	0.419773
PMC.dPMC18454201.s65.p2	http://www.ncbi.nlm.nih.gov/pubmed/18454201	http://colonet.informatik.hu-berlin.de/geneview/view/abstract/18454201	RorcÔêÆ/ÔêÆ Mice Display Normal Circadian Rhythms Rora and Rorb have been characterized as clock components, functioning to regulate Bmal1 expression in the SCN () ,,,.	Bmal1|11865@10090	Rorb|225998@10090	0.257977
PMC.dPMC22384149.s180.p0	http://www.ncbi.nlm.nih.gov/pubmed/22384149	http://colonet.informatik.hu-berlin.de/geneview/view/abstract/22384149	Like another recent finding that implicated the clock genes ARNTL and RORB in BD , our results demonstrate the value of strategies that integrate disparate sources of biological and genetic data.	RORB|225998@10090	ARNTL|11865@10090	0.245585
Sentences between NEFM and RORB
PMC.dPMC19087254.s212.p43	http://www.ncbi.nlm.nih.gov/pubmed/19087254	http://colonet.informatik.hu-berlin.de/geneview/view/abstract/19087254	2D-DIGE: two-dimensional differential in-gel electrophoresis; A╬▓: ╬▓-amyloid peptides; AD: Alzheimer's disease; AICD: APP intracellular domain; ANOVA: analysis of variance; APP: amyloid precursor protein; C99: C-terminal fragment of APP; CRABP1: cellular retinoic acid binding protein 1; FBS: fetal bovine serum; INA: internexin neuronal intermediate filament protein alpha; MALDI-TOF-MS: matrix as…	RORB|6096@9606	NEF3|4741@9606	0.261903
PMC.dPMC19087254.s212.p44	http://www.ncbi.nlm.nih.gov/pubmed/19087254	http://colonet.informatik.hu-berlin.de/geneview/view/abstract/19087254	2D-DIGE: two-dimensional differential in-gel electrophoresis; A╬▓: ╬▓-amyloid peptides; AD: Alzheimer's disease; AICD: APP intracellular domain; ANOVA: analysis of variance; APP: amyloid precursor protein; C99: C-terminal fragment of APP; CRABP1: cellular retinoic acid binding protein 1; FBS: fetal bovine serum; INA: internexin neuronal intermediate filament protein alpha; MALDI-TOF-MS: matrix as…	RORB|6096@9606	neurofilament 3|4741@9606	0.261903
PMC.dPMC19087254.s212.p52	http://www.ncbi.nlm.nih.gov/pubmed/19087254	http://colonet.informatik.hu-berlin.de/geneview/view/abstract/19087254	2D-DIGE: two-dimensional differential in-gel electrophoresis; A╬▓: ╬▓-amyloid peptides; AD: Alzheimer's disease; AICD: APP intracellular domain; ANOVA: analysis of variance; APP: amyloid precursor protein; C99: C-terminal fragment of APP; CRABP1: cellular retinoic acid binding protein 1; FBS: fetal bovine serum; INA: internexin neuronal intermediate filament protein alpha; MALDI-TOF-MS: matrix as…	receptor B|6096@9606	NEF3|4741@9606	0.261903
PMC.dPMC19087254.s212.p53	http://www.ncbi.nlm.nih.gov/pubmed/19087254	http://colonet.informatik.hu-berlin.de/geneview/view/abstract/19087254	2D-DIGE: two-dimensional differential in-gel electrophoresis; A╬▓: ╬▓-amyloid peptides; AD: Alzheimer's disease; AICD: APP intracellular domain; ANOVA: analysis of variance; APP: amyloid precursor protein; C99: C-terminal fragment of APP; CRABP1: cellular retinoic acid binding protein 1; FBS: fetal bovine serum; INA: internexin neuronal intermediate filament protein alpha; MALDI-TOF-MS: matrix as…	receptor B|6096@9606	neurofilament 3|4741@9606	0.261903
Sentences between NRL and RORB
PMID.dPMID19805139.s10.p0	http://www.ncbi.nlm.nih.gov/pubmed/19805139	http://colonet.informatik.hu-berlin.de/geneview/view/abstract/19805139	Thus, Rorb directs rod development and does so at least in part by inducing the Nrl-mediated pathway of rod differentiation.	Nrl|18185@10090	Rorb|225998@10090	0.30794
PMID.dPMID19805139.s9.p0	http://www.ncbi.nlm.nih.gov/pubmed/19805139	http://colonet.informatik.hu-berlin.de/geneview/view/abstract/19805139	Rorb(-/-) mice lack Nrl expression and reexpression of Nrl in Rorb(-/-) mice converts cones to rod-like cells.	Nrl|18185@10090	Rorb|225998@10090	0.13508
PMID.dPMID19805139.s9.p5	http://www.ncbi.nlm.nih.gov/pubmed/19805139	http://colonet.informatik.hu-berlin.de/geneview/view/abstract/19805139	Rorb(-/-) mice lack Nrl expression and reexpression of Nrl in Rorb(-/-) mice converts cones to rod-like cells.	Rorb|225998@10090	Nrl|18185@10090	0.00273199
Sentences between RORB and REV3L
PMC.dPMC18454201.s40.p8	http://www.ncbi.nlm.nih.gov/pubmed/18454201	http://colonet.informatik.hu-berlin.de/geneview/view/abstract/18454201	As deletion of Rev-erb╬▒, Rora or Rorb results in a broader distribution of circadian period lengths, it was suggested that the ROR/REV/Bmal1 loop serves as a stabilizing mechanism ÔÇô,.	REV|19714@10090	Rorb|225998@10090	0.552216
PMC.dPMC18454201.s233.p0	http://www.ncbi.nlm.nih.gov/pubmed/18454201	http://colonet.informatik.hu-berlin.de/geneview/view/abstract/18454201	In line with this notion, behavioral studies have implicated Rev-erb╬▒ and Rorb in photic responses ,.	Rorb|225998@10090	Rev|19714@10090	0.536207
PMC.dPMC18454201.s40.p1	http://www.ncbi.nlm.nih.gov/pubmed/18454201	http://colonet.informatik.hu-berlin.de/geneview/view/abstract/18454201	As deletion of Rev-erb╬▒, Rora or Rorb results in a broader distribution of circadian period lengths, it was suggested that the ROR/REV/Bmal1 loop serves as a stabilizing mechanism ÔÇô,.	Rorb|225998@10090	Rev|19714@10090	0.169265
Sentences between PER3 and RORB
PMC.dPMC18846204.s183.p24	http://www.ncbi.nlm.nih.gov/pubmed/18846204	http://colonet.informatik.hu-berlin.de/geneview/view/abstract/18846204	Among the seven DBOX controlled genes identified by Ueda et al., Nr1d1, Nr1d2, Rora, Rorb, Per1, Per2, and Per3, we only identified Per3.	Per3|18628@10090	Rorb|225998@10090	0.246732
PMC.dPMC18846204.s183.p18	http://www.ncbi.nlm.nih.gov/pubmed/18846204	http://colonet.informatik.hu-berlin.de/geneview/view/abstract/18846204	Among the seven DBOX controlled genes identified by Ueda et al., Nr1d1, Nr1d2, Rora, Rorb, Per1, Per2, and Per3, we only identified Per3.	Per3|18628@10090	Rorb|225998@10090	0.021496
Sentences between RXRG and RORB
PMC.dPMC20195522.s92.p5	http://www.ncbi.nlm.nih.gov/pubmed/20195522	http://colonet.informatik.hu-berlin.de/geneview/view/abstract/20195522	Moreover, ARNTL, RORA, RORB and RXRG were associated with bipolar disorder in a meta-analysis integrating data from genome-wide association studies and human and animal model expression studies .	RXRG|6258@9606	RORB|6096@9606	0.630158
PMC.dPMC20856823.s97.p5	http://www.ncbi.nlm.nih.gov/pubmed/20856823	http://colonet.informatik.hu-berlin.de/geneview/view/abstract/20856823	Moreover, ARNTL, RORA, RORB and RXRG were associated with bipolar disorder in a meta-analysis integrating data from genome-wide association studies and human and animal model expression studies , .	RXRG|6258@9606	RORB|6096@9606	0.588575
Sentences between RORB and ANTXR2
PMC.dPMC16184189.s224.p0	http://www.ncbi.nlm.nih.gov/pubmed/16184189	http://colonet.informatik.hu-berlin.de/geneview/view/abstract/16184189	(F) Consistent with the ISH data, a statistically significant decrease in Rorb expression was found in brl by quantitative real-time PCR (p = 0.008).	Rorb|225998@10090	ISH|118429@9606	0.58819
PMC.dPMC16184189.s82.p2	http://www.ncbi.nlm.nih.gov/pubmed/16184189	http://colonet.informatik.hu-berlin.de/geneview/view/abstract/16184189	Three pairs of P7 brains from brl mutants and their heterozygous littermate controls (possessing intact barrel maps) were subjected simultaneously to robotic ISH using Rorb and Grm2 riboprobes.	Rorb|225998@10090	ISH|118429@9606	0.056293
Sentences between RORC and RORB
PMC.dPMC18454201.s325.p0	http://www.ncbi.nlm.nih.gov/pubmed/18454201	http://colonet.informatik.hu-berlin.de/geneview/view/abstract/18454201	Note that in fibroblasts, Rorb and Rorc are not detected, and Rora expression does not display a distinct mRNA rhythm.	Rorc|19885@10090	Rorb|225998@10090	0.118425
PMC.dPMC18454201.s98.p0	http://www.ncbi.nlm.nih.gov/pubmed/18454201	http://colonet.informatik.hu-berlin.de/geneview/view/abstract/18454201	Because Rorb and Rorc are also not expressed in Rorasg/sg fibroblasts as determined by Q-PCR (data not shown), thus excluding the possibility of a compensation mechanism, the positive arm of the ROR/REV/Bmal1 loop is essentially missing in cells lacking Rora function.	Rorc|19885@10090	Rorb|225998@10090	0.052937
Sentences between CRABP1 and RORB
PMC.dPMC19087254.s212.p40	http://www.ncbi.nlm.nih.gov/pubmed/19087254	http://colonet.informatik.hu-berlin.de/geneview/view/abstract/19087254	2D-DIGE: two-dimensional differential in-gel electrophoresis; A╬▓: ╬▓-amyloid peptides; AD: Alzheimer's disease; AICD: APP intracellular domain; ANOVA: analysis of variance; APP: amyloid precursor protein; C99: C-terminal fragment of APP; CRABP1: cellular retinoic acid binding protein 1; FBS: fetal bovine serum; INA: internexin neuronal intermediate filament protein alpha; MALDI-TOF-MS: matrix as…	RORB|6096@9606	cellular retinoic acid binding protein 1|1381@9606	0.261903
PMC.dPMC19087254.s212.p49	http://www.ncbi.nlm.nih.gov/pubmed/19087254	http://colonet.informatik.hu-berlin.de/geneview/view/abstract/19087254	2D-DIGE: two-dimensional differential in-gel electrophoresis; A╬▓: ╬▓-amyloid peptides; AD: Alzheimer's disease; AICD: APP intracellular domain; ANOVA: analysis of variance; APP: amyloid precursor protein; C99: C-terminal fragment of APP; CRABP1: cellular retinoic acid binding protein 1; FBS: fetal bovine serum; INA: internexin neuronal intermediate filament protein alpha; MALDI-TOF-MS: matrix as…	receptor B|6096@9606	cellular retinoic acid binding protein 1|1381@9606	0.261903
Sentences between NR1D1 and RORB
PMC.dPMC18846204.s183.p3	http://www.ncbi.nlm.nih.gov/pubmed/18846204	http://colonet.informatik.hu-berlin.de/geneview/view/abstract/18846204	Among the seven DBOX controlled genes identified by Ueda et al., Nr1d1, Nr1d2, Rora, Rorb, Per1, Per2, and Per3, we only identified Per3.	Rorb|225998@10090	Nr1d1|217166@10090	0.270524
PMC.dPMC18846204.s29.p9	http://www.ncbi.nlm.nih.gov/pubmed/18846204	http://colonet.informatik.hu-berlin.de/geneview/view/abstract/18846204	Other key circadian genes such as Dbp and Nfil3 controlling the D-box element and Rora/Rorb/Rorc and Nr1d1/Nr1d2 controlling the RRE (Rev-erb/Ror element) have also been shown to be important to the mammalian circadian rhythm.	Nr1d1|217166@10090	Rorb|225998@10090	0.05635
Sentences between LXN and RORB
PMC.dPMC21269499.s151.p0	http://www.ncbi.nlm.nih.gov/pubmed/21269499	http://colonet.informatik.hu-berlin.de/geneview/view/abstract/21269499	In situ images from the Allen Brain Atlas suggest this situation for at least Lxn and Rorb.	Rorb|225998@10090	Lxn|59073@10116	0.985139
PMC.dPMC21269499.s143.p0	http://www.ncbi.nlm.nih.gov/pubmed/21269499	http://colonet.informatik.hu-berlin.de/geneview/view/abstract/21269499	In support of our findings, several of the identified regionally enriched genes have previously been described to display patterned expression in developing or adult cortex, e.g. Lxn, Rorb, Nr2f1, Lmo4 and Odz3 (see below) [,,-].	Rorb|225998@10090	Lxn|59073@10116	0.091194
Sentences between OTX2 and RORB
PMID.dPMID20648062.s4.p0	http://www.ncbi.nlm.nih.gov/pubmed/20648062	http://colonet.informatik.hu-berlin.de/geneview/view/abstract/20648062	Recent progress in mammalian photoreceptor development has identified a complex relationship between six key transcription-regulatory factors (RORbeta, OTX2, NRL, CRX, NR2E3 and TRbeta2) that determine rod versus M cone or S cone cell fate.	OTX2|5015@9606	RORbeta|6096@9606	0.333114
PMC.dPMC21267068.s340.p19	http://www.ncbi.nlm.nih.gov/pubmed/21267068	http://colonet.informatik.hu-berlin.de/geneview/view/abstract/21267068	These patterns are representative of other genes expressed in alar derivatives including the TM and AH regions: Lhx6, Lhx9, Dlx1, Dlx2, Dlx5, Unc4, Cited, Rorb, Arx, Foxa2, and Otx2.	Otx2|18424@10090	Rorb|225998@10090	0.098995
Sentences between PER1 and RORB
PMC.dPMC18846204.s183.p9	http://www.ncbi.nlm.nih.gov/pubmed/18846204	http://colonet.informatik.hu-berlin.de/geneview/view/abstract/18846204	Among the seven DBOX controlled genes identified by Ueda et al., Nr1d1, Nr1d2, Rora, Rorb, Per1, Per2, and Per3, we only identified Per3.	Per1|18626@10090	Rorb|225998@10090	0.16882
PMC.dPMC22347798.s224.p0	http://www.ncbi.nlm.nih.gov/pubmed/22347798	http://colonet.informatik.hu-berlin.de/geneview/view/abstract/22347798	The first probably occurs through 5-HT(3) and 5-HT(2C) receptor interactions, while the second seems related to direct modulation of clock genes, possibly through 5-HT(1A) receptors, ie, downregulation of Per1 and Ror-beta expression and upregulation of Rev-erb-alfa, correlated with daytime behavioral phase advance, while night-time photic resetting attenuation is associated with altered expressi…	Ror-beta|6096@9606	Per1|287422@10116	0.033571
Sentences between HMI and RORB
PMC.dPMC21542937.s86.p1	http://www.ncbi.nlm.nih.gov/pubmed/21542937	http://colonet.informatik.hu-berlin.de/geneview/view/abstract/21542937	ACC: anterior cingulate cortex; AChE: acetylcholinesterase; BA: basal amygdala; BA9: Brodman area 9; BA47: Brodman area 47; BLA: basolateral amygdala; ETC: electron transport chain; IPA: Ingenuity Pathways Analysis; LA: lateral amygdala; qPCR: Real-time Quantitative PCR; RORB: retinoic acid orphan receptor ╬▓; SIRT: sirtuin; THRA: thyroid hormone receptor ╬▒.	RORB|6096@9606	IPA|3160@9606	0.261903
PMC.dPMC21542937.s86.p2	http://www.ncbi.nlm.nih.gov/pubmed/21542937	http://colonet.informatik.hu-berlin.de/geneview/view/abstract/21542937	ACC: anterior cingulate cortex; AChE: acetylcholinesterase; BA: basal amygdala; BA9: Brodman area 9; BA47: Brodman area 47; BLA: basolateral amygdala; ETC: electron transport chain; IPA: Ingenuity Pathways Analysis; LA: lateral amygdala; qPCR: Real-time Quantitative PCR; RORB: retinoic acid orphan receptor ╬▓; SIRT: sirtuin; THRA: thyroid hormone receptor ╬▒.	RORB|6096@9606	Ingenuity Pathways Analysis|3160@9606	0.261903
Sentences between ETV1 and RORB
PMC.dPMC22427329.s52.p0	http://www.ncbi.nlm.nih.gov/pubmed/22427329	http://colonet.informatik.hu-berlin.de/geneview/view/abstract/22427329	Examples include Ror-beta (in 50% of layer IV neurons), Er81 (in 31% of layer V neurons) and Nurr1 in layer VI (; ).	Er81|2115@9606	Ror-beta|6096@9606	0.233189
Sentences between EPAS1 and RORB
PMC.dPMC18846204.s50.p6	http://www.ncbi.nlm.nih.gov/pubmed/18846204	http://colonet.informatik.hu-berlin.de/geneview/view/abstract/18846204	Other known key circadian genes: Rorb, Cry2, Rora, Npas2, and Hlf were found to be circadian oscillating in one, three, three, four, and five tissues, respectively.	Hlf|13819@10090	Rorb|225998@10090	0.041581
Sentences between RASD1 and RORB
PMC.dPMC22662235.s232.p9	http://www.ncbi.nlm.nih.gov/pubmed/22662235	http://colonet.informatik.hu-berlin.de/geneview/view/abstract/22662235	Clock genes per2, cry1, rora, rorb, and rasd1 are also highly SCN-enriched, supporting the specific role of SCN as the master clock.	rasd1|19416@10090	rorb|225998@10090	0.095548
Sentences between THRA and RORB
PMC.dPMC21542937.s86.p5	http://www.ncbi.nlm.nih.gov/pubmed/21542937	http://colonet.informatik.hu-berlin.de/geneview/view/abstract/21542937	ACC: anterior cingulate cortex; AChE: acetylcholinesterase; BA: basal amygdala; BA9: Brodman area 9; BA47: Brodman area 47; BLA: basolateral amygdala; ETC: electron transport chain; IPA: Ingenuity Pathways Analysis; LA: lateral amygdala; qPCR: Real-time Quantitative PCR; RORB: retinoic acid orphan receptor ╬▓; SIRT: sirtuin; THRA: thyroid hormone receptor ╬▒.	THRA|7067@9606	RORB|6096@9606	0.261903
Sentences between RORB and ADCY1
PMC.dPMC16184189.s104.p0	http://www.ncbi.nlm.nih.gov/pubmed/16184189	http://colonet.informatik.hu-berlin.de/geneview/view/abstract/16184189	The subsequent detection of down-regulation of the transcription factor gene Rorb in brl cortex (D) raises the possibility that activity-controlled signaling, mediated by adenylate cyclase 1 in cortical map formation, converges on gene transcription.	adenylate cyclase 1|432530@10090	Rorb|225998@10090	0.122798
Sentences between GRIN2C and RORB
PMC.dPMC22662235.s115.p0	http://www.ncbi.nlm.nih.gov/pubmed/22662235	http://colonet.informatik.hu-berlin.de/geneview/view/abstract/22662235	Of the 25 shell-enriched genes, three (grin2c, rorb, and btg2) are more highly expressed in shell at both time points.	rorb|225998@10090	grin2c|14813@10090	0.07727
Sentences between RORB and NR2E3
PMID.dPMID20648062.s4.p1	http://www.ncbi.nlm.nih.gov/pubmed/20648062	http://colonet.informatik.hu-berlin.de/geneview/view/abstract/20648062	Recent progress in mammalian photoreceptor development has identified a complex relationship between six key transcription-regulatory factors (RORbeta, OTX2, NRL, CRX, NR2E3 and TRbeta2) that determine rod versus M cone or S cone cell fate.	NR2E3|10002@9606	RORbeta|6096@9606	0.042815
Sentences between RORB and CRY2
PMC.dPMC18846204.s50.p0	http://www.ncbi.nlm.nih.gov/pubmed/18846204	http://colonet.informatik.hu-berlin.de/geneview/view/abstract/18846204	Other known key circadian genes: Rorb, Cry2, Rora, Npas2, and Hlf were found to be circadian oscillating in one, three, three, four, and five tissues, respectively.	Cry2|12953@10090	Rorb|225998@10090	0.20804
Sentences between SOX4 and RORB
PMC.dPMC19799774.s297.p0	http://www.ncbi.nlm.nih.gov/pubmed/19799774	http://colonet.informatik.hu-berlin.de/geneview/view/abstract/19799774	By E17.5, Sox4 expression becomes obvious at the rostral cortical plate, which is similar to Rorb.	Rorb|225998@10090	Sox4|6659@9606	0.416958
Sentences between RORB and NIN
PMC.dPMC21267068.s134.p5	http://www.ncbi.nlm.nih.gov/pubmed/21267068	http://colonet.informatik.hu-berlin.de/geneview/view/abstract/21267068	2610306H15Rik and Hist1h1d are localized at different apico-basal levels of the ventricular epithelium, Nhlh1 is expressed in the subventricular and intermediate zones, and Nin and Rorb are expressed in cells localized at different radial levels of the mantle layer.	Rorb|225998@10090	Nin|18080@10090	0.00612299
Sentences between AFF1 and RORB
PMC.dPMC16184189.s82.p1	http://www.ncbi.nlm.nih.gov/pubmed/16184189	http://colonet.informatik.hu-berlin.de/geneview/view/abstract/16184189	Three pairs of P7 brains from brl mutants and their heterozygous littermate controls (possessing intact barrel maps) were subjected simultaneously to robotic ISH using Rorb and Grm2 riboprobes.	Rorb|225998@10090	robotic|17355@10090	0.044518
Sentences between DLX1 and RORB
PMC.dPMC21267068.s340.p6	http://www.ncbi.nlm.nih.gov/pubmed/21267068	http://colonet.informatik.hu-berlin.de/geneview/view/abstract/21267068	These patterns are representative of other genes expressed in alar derivatives including the TM and AH regions: Lhx6, Lhx9, Dlx1, Dlx2, Dlx5, Unc4, Cited, Rorb, Arx, Foxa2, and Otx2.	Rorb|225998@10090	Dlx1|13390@10090	0.033504
Sentences between OPN1SW and RORB
PMC.dPMC17653270.s208.p0	http://www.ncbi.nlm.nih.gov/pubmed/17653270	http://colonet.informatik.hu-berlin.de/geneview/view/abstract/17653270	Lastly, a recent paper showed that the orphan nuclear receptor TF, RORbeta, is required for the activation of Opn1sw.	Opn1sw|12057@10090	RORbeta|6096@9606	0.081667
Sentences between FOXA2 and RORB
PMC.dPMC21267068.s340.p14	http://www.ncbi.nlm.nih.gov/pubmed/21267068	http://colonet.informatik.hu-berlin.de/geneview/view/abstract/21267068	These patterns are representative of other genes expressed in alar derivatives including the TM and AH regions: Lhx6, Lhx9, Dlx1, Dlx2, Dlx5, Unc4, Cited, Rorb, Arx, Foxa2, and Otx2.	Foxa2|15376@10090	Rorb|225998@10090	0.108131
Interactions for PRKCA(5578)
Sentences between PRKCG and PRKCA
PMID.dPMID10021296.s10.p0	http://www.ncbi.nlm.nih.gov/pubmed/10021296	http://colonet.informatik.hu-berlin.de/geneview/view/abstract/10021296	Only PKC-alpha and PKC-gamma expression increased with increasing indices of paclitaxel resistance.	PKC-gamma|5582@9606	PKC-alpha|5578@9606	143452
PMID.dPMID11950841.s8.p0	http://www.ncbi.nlm.nih.gov/pubmed/11950841	http://colonet.informatik.hu-berlin.de/geneview/view/abstract/11950841	Here we show that PKC-alpha and PKC-epsilon become associated with 14-3-3 zeta when the cells are neuronally differentiated by nerve growth factor.	PKC|24681@10116	PKC-alpha|24680@10116	108463
PMID.dPMID14670076.s7.p1	http://www.ncbi.nlm.nih.gov/pubmed/14670076	http://colonet.informatik.hu-berlin.de/geneview/view/abstract/14670076	Furthermore, the activation of PKC increased the extent of interaction between syndecan-4 and PKC-alpha.	PKC-alpha|24680@10116	PKC|24681@10116	0.799403
PMID.dPMID11054691.s5.p0	http://www.ncbi.nlm.nih.gov/pubmed/11054691	http://colonet.informatik.hu-berlin.de/geneview/view/abstract/11054691	PKC-alpha, PKC-beta, PKC-gamma, PKC-delta, and PKC-epsilon are found within the cerebellum.	PKC|24681@10116	PKC-alpha|24680@10116	0.751626
PMID.dPMID1953788.s4.p0	http://www.ncbi.nlm.nih.gov/pubmed/1953788	http://colonet.informatik.hu-berlin.de/geneview/view/abstract/1953788	Upon long-term treatment with phorbol ester PKC-alpha is depleted faster than PKC-epsilon.	PKC|24681@10116	PKC-alpha|24680@10116	0.750426
PMID.dPMID8076696.s8.p0	http://www.ncbi.nlm.nih.gov/pubmed/8076696	http://colonet.informatik.hu-berlin.de/geneview/view/abstract/8076696	We conclude that PKC-alpha and -epsilon, but not PKC-delta, are implicated in cholinergic agonist-induced protein secretion in rat lacrimal gland.	PKC|24681@10116	PKC-alpha|24680@10116	0.736422
PMID.dPMID12859346.s11.p0	http://www.ncbi.nlm.nih.gov/pubmed/12859346	http://colonet.informatik.hu-berlin.de/geneview/view/abstract/12859346	These results suggest that PKCgamma has a modulatory role in determining retinal slip dependency, and other PKC subtypes, e.g. PKCalpha, may play a crucial role in the adaptation of the HOKR.	PKCalpha|18750@10090	PKCgamma|18752@10090	0.736146
PMID.dPMID1426252.s5.p0	http://www.ncbi.nlm.nih.gov/pubmed/1426252	http://colonet.informatik.hu-berlin.de/geneview/view/abstract/1426252	PKC-eta expressed in COS cells, was solubilized by 1% Triton X-100 and purified away from the endogenous PKC-alpha by ammonium sulphate fractionation.	PKC-alpha|24680@10116	PKC|24681@10116	0.722807
PMID.dPMID12673781.s13.p0	http://www.ncbi.nlm.nih.gov/pubmed/12673781	http://colonet.informatik.hu-berlin.de/geneview/view/abstract/12673781	These results suggest that PKC, especially PKC-alpha activity, is decreased in Schwann cells exposed to high glucose and that this deficit is mediated through polyol pathway hyperactivity.	PKC-alpha|24680@10116	PKC|24681@10116	0.721617
PMID.dPMID19657079.s10.p0	http://www.ncbi.nlm.nih.gov/pubmed/19657079	http://colonet.informatik.hu-berlin.de/geneview/view/abstract/19657079	These data indicate that activation of PKC, most likely PKCalpha, increases the neuronal excitability of striatal cholinergic interneurons by down-regulating I(A).	PKCalpha|24680@10116	PKC|24681@10116	0.683884
Sentences between DYT10 and PRKCA
PMID.dPMID2013316.s12.p0	http://www.ncbi.nlm.nih.gov/pubmed/2013316	http://colonet.informatik.hu-berlin.de/geneview/view/abstract/2013316	These preliminary results suggest that PKC suppression of PKC-alpha mRNA is associated with reversion of the malignant phenotype.	PKC-alpha|5578@9606	PKC|50818@9606	12414
PMID.dPMID9920929.s7.p0	http://www.ncbi.nlm.nih.gov/pubmed/9920929	http://colonet.informatik.hu-berlin.de/geneview/view/abstract/9920929	The conventional PKC group includes PKCalpha, PKCbetaI, PKCbetaII, and PKCgamma.	PKCalpha|5578@9606	PKC|50818@9606	0.921534
PMID.dPMID11309397.s11.p0	http://www.ncbi.nlm.nih.gov/pubmed/11309397	http://colonet.informatik.hu-berlin.de/geneview/view/abstract/11309397	Activated PKC-alpha but not PKC-epsilon induced marked phosphorylation of GDI in vitro.	PKC|50818@9606	PKC-alpha|5578@9606	0.693358
PMID.dPMID17724468.s8.p0	http://www.ncbi.nlm.nih.gov/pubmed/17724468	http://colonet.informatik.hu-berlin.de/geneview/view/abstract/17724468	These results suggest that PKCalpha, rather than PKC isoforms in other PKC classes, participates in LPA-induced NF-kappaB activation and uPA upregulation in ovarian cancer cells.	PKC|50818@9606	PKCalpha|5578@9606	0.651637
PMID.dPMID7730364.s7.p0	http://www.ncbi.nlm.nih.gov/pubmed/7730364	http://colonet.informatik.hu-berlin.de/geneview/view/abstract/7730364	The data indicate that PKC-epsilon and, to a lesser extent PKC-alpha but not -zeta, can regulate the transcription factors AP-1 and nuclear factor of activated T cells (NF-AT-1).	PKC-alpha|5578@9606	PKC|50818@9606	0.644539
PMID.dPMID7500380.s11.p0	http://www.ncbi.nlm.nih.gov/pubmed/7500380	http://colonet.informatik.hu-berlin.de/geneview/view/abstract/7500380	Growth cones isolated from such cells are also enriched in PKC-alpha and PKC-epsilon, but not in PKC-zeta.	PKC|50818@9606	PKC-alpha|5578@9606	0.620064
PMID.dPMID9506439.s18.p0	http://www.ncbi.nlm.nih.gov/pubmed/9506439	http://colonet.informatik.hu-berlin.de/geneview/view/abstract/9506439	These results indicate that PKC, specifically PKC-alpha and PKC-eta, mediates the TPA-dependent activation of involucrin gene expression of SVHK cells.	PKC-alpha|5578@9606	PKC|50818@9606	0.564211
PMID.dPMID14709334.s1.p0	http://www.ncbi.nlm.nih.gov/pubmed/14709334	http://colonet.informatik.hu-berlin.de/geneview/view/abstract/14709334	Cooperation between PKC-alpha and PKC-epsilon in the regulation of JNK activation in human lung cancer cells.	PKC|50818@9606	PKC-alpha|5578@9606	0.563347
PMID.dPMID7500380.s5.p0	http://www.ncbi.nlm.nih.gov/pubmed/7500380	http://colonet.informatik.hu-berlin.de/geneview/view/abstract/7500380	In growth cones prepared from differentiating cells PKC-alpha and PKC-epsilon were enriched.	PKC|50818@9606	PKC-alpha|5578@9606	0.537461
PMID.dPMID10510401.s14.p0	http://www.ncbi.nlm.nih.gov/pubmed/10510401	http://colonet.informatik.hu-berlin.de/geneview/view/abstract/10510401	We conclude that conventional PKC isoforms (PKC-alpha and/or PKC-betaII) may regulate PMA-stimulated cytoskeletal association and activation of NADPH oxidase.	PKC-alpha|5578@9606	PKC|50818@9606	0.53253
Sentences between PRKCA and PRKCB
PMID.dPMID19887445.s5.p0	http://www.ncbi.nlm.nih.gov/pubmed/19887445	http://colonet.informatik.hu-berlin.de/geneview/view/abstract/19887445	Immunoblotting demonstrated that multiple PKC isoforms, including PKCalpha, PKCbeta, PKCepsilon, and PKC, translocated from the cytosol to a membrane-bound fraction at these PMA concentrations.	PKCbeta|5579@9606	PKCalpha|5578@9606	0.762068
PMID.dPMID10376789.s6.p0	http://www.ncbi.nlm.nih.gov/pubmed/10376789	http://colonet.informatik.hu-berlin.de/geneview/view/abstract/10376789	In WY-induced hepatocellular adenomas, PKCalpha was increased, and PKCbeta was further decreased in membrane fractions.	PKCbeta|25023@10116	PKCalpha|24680@10116	0.759779
PMID.dPMID19403597.s8.p0	http://www.ncbi.nlm.nih.gov/pubmed/19403597	http://colonet.informatik.hu-berlin.de/geneview/view/abstract/19403597	Inhibition of PKCalpha and PKCbeta with G├Â6976 had no effect.	PKCbeta|18751@10090	PKCalpha|18750@10090	0.609806
PMID.dPMID10822170.s13.p0	http://www.ncbi.nlm.nih.gov/pubmed/10822170	http://colonet.informatik.hu-berlin.de/geneview/view/abstract/10822170	PKC-alpha promotes the differentiation process of THP-1 cells, PKC-beta retards the differentiation of THP-1 cells into macrophage-like cells.	PKC-beta|5579@9606	PKC-alpha|5578@9606	0.588433
PMID.dPMID17261275.s12.p0	http://www.ncbi.nlm.nih.gov/pubmed/17261275	http://colonet.informatik.hu-berlin.de/geneview/view/abstract/17261275	We show that PKCalpha and PKCbeta are critical for PLA-LDL-induced Akt phosphorylation and survival in THP-1 monocytic cells.	PKCbeta|5579@9606	PKCalpha|5578@9606	0.559368
PMID.dPMID9843156.s11.p0	http://www.ncbi.nlm.nih.gov/pubmed/9843156	http://colonet.informatik.hu-berlin.de/geneview/view/abstract/9843156	The cell membranes showed stronger immunoreactivities than did the cytoplasms for both PKCalpha and PKCbeta.	PKCbeta|25023@10116	PKCalpha|24680@10116	0.554
PMID.dPMID1822247.s6.p0	http://www.ncbi.nlm.nih.gov/pubmed/1822247	http://colonet.informatik.hu-berlin.de/geneview/view/abstract/1822247	These results suggest that: (i) PKC-alpha and PKC-beta isozymes can be specifically downregulated in rat adipocytes by antisense oligodeoxynucleotides, and (ii) insulin-stimulated glucose transport requires PKC.	PKC-beta|25023@10116	PKC-alpha|24680@10116	0.523717
PMID.dPMID15009987.s14.p0	http://www.ncbi.nlm.nih.gov/pubmed/15009987	http://colonet.informatik.hu-berlin.de/geneview/view/abstract/15009987	The increases of PI and PC and PKC-alpha/PKC-beta II ratio change are related with colorectal cancer genesis.	PKC-beta|5579@9606	PKC-alpha|5578@9606	0.512167
PMID.dPMID19556521.s13.p0	http://www.ncbi.nlm.nih.gov/pubmed/19556521	http://colonet.informatik.hu-berlin.de/geneview/view/abstract/19556521	In conclusion, PKCalpha functions distinctly from PKCbeta and PKCgamma in regulating cardiac contractility and heart failure, and broad-acting PKC inhibitors such as ruboxistaurin could represent a novel therapeutic approach in treating human heart failure.	PKCbeta|5579@9606	PKCalpha|5578@9606	0.462054
PMID.dPMID16963226.s8.p0	http://www.ncbi.nlm.nih.gov/pubmed/16963226	http://colonet.informatik.hu-berlin.de/geneview/view/abstract/16963226	To distinguish between PKCalpha and PKCbeta isoenzymes in regulating cPLA(2) protein phosphorylation and enzymatic activity, we employed our previously characterized PKCalpha or PKCbeta isoenzyme-specific antisense ODN [Li Q., Subbulakshmi V., Fields A.P., Murray, N.R., Cathcart M.K., J. Biol. Chem. 274 (6) (1999) 3764-3771].	PKCbeta|5579@9606	PKCalpha|5578@9606	0.439023
Sentences between PRKCA and PRKCD
PMID.dPMID8223588.s13.p0	http://www.ncbi.nlm.nih.gov/pubmed/8223588	http://colonet.informatik.hu-berlin.de/geneview/view/abstract/8223588	These data indicate that PKC-alpha and PKC-delta isoenzymes are candidates for regulating prostaglandin and leukotriene production.	PKC-delta|18753@10090	PKC-alpha|18750@10090	108628
PMID.dPMID9407126.s9.p0	http://www.ncbi.nlm.nih.gov/pubmed/9407126	http://colonet.informatik.hu-berlin.de/geneview/view/abstract/9407126	Bryo at high concentrations also inhibited the down-regulation of PKCdelta/delta and PKCalpha/delta induced by 1 microM PMA when co-applied.	PKCalpha|18750@10090	PKCdelta|18753@10090	0.658176
PMID.dPMID19417139.s6.p0	http://www.ncbi.nlm.nih.gov/pubmed/19417139	http://colonet.informatik.hu-berlin.de/geneview/view/abstract/19417139	No PKCalpha or PKCdelta mutation was detected in Colo205-S and Colo205-R cells.	PKCdelta|18753@10090	PKCalpha|5578@9606	0.593139
PMID.dPMID8010956.s6.p0	http://www.ncbi.nlm.nih.gov/pubmed/8010956	http://colonet.informatik.hu-berlin.de/geneview/view/abstract/8010956	Of the remaining three isoenzymes identified, carcinogens alone had no effect on the cellular status of PKC-alpha and PKC-delta, although they appeared to promote slightly PMA-induced membrane translocation of the cytosolic forms of these isoenzymes in exponentially growing cells.	PKC-delta|18753@10090	PKC-alpha|18750@10090	0.521125
PMID.dPMID8942657.s7.p0	http://www.ncbi.nlm.nih.gov/pubmed/8942657	http://colonet.informatik.hu-berlin.de/geneview/view/abstract/8942657	Unlike PKC-alpha, PKC-delta favorably phosphorylated the PKA-preferred site Ser-23/Ser-24 and hence, like PKA, reduced the Ca2+ sensitivity of the reconstituted actomyosin S-1 MgATPase.	PKC-delta|18753@10090	PKC-alpha|18750@10090	0.481505
PMID.dPMID7870033.s6.p0	http://www.ncbi.nlm.nih.gov/pubmed/7870033	http://colonet.informatik.hu-berlin.de/geneview/view/abstract/7870033	PKC-delta and -epsilon were translocated with 2 orders of magnitude higher potency than was PKC-alpha.	PKC-alpha|18750@10090	PKC-delta|18753@10090	0.475698
PMID.dPMID8223588.s14.p0	http://www.ncbi.nlm.nih.gov/pubmed/8223588	http://colonet.informatik.hu-berlin.de/geneview/view/abstract/8223588	From the potent inhibitory activities of K-252a and CGP41251, two compounds that reportedly display a higher selectivity for PKC-alpha compared to PKC-delta, it is suggested that PKC-alpha triggers arachidonic acid mobilization and eicosanoid synthesis in peritoneal macrophages.	PKC-delta|18753@10090	PKC-alpha|18750@10090	0.402577
PMID.dPMID9548940.s1.p9	http://www.ncbi.nlm.nih.gov/pubmed/9548940	http://colonet.informatik.hu-berlin.de/geneview/view/abstract/9548940	Cross-talk between protein kinase C-alpha (PKC-alpha) and -delta (PKC-delta): PKC-alpha elevates the PKC-delta protein level, altering its mRNA transcription and degradation.	PKC-delta|18753@10090	PKC-alpha|18750@10090	0.398947
PMID.dPMID10471775.s8.p0	http://www.ncbi.nlm.nih.gov/pubmed/10471775	http://colonet.informatik.hu-berlin.de/geneview/view/abstract/10471775	SPP increased membrane association of PKCalpha, PKCdelta and PKClambda, however, only PKCalpha and PKCdelta played a role in PLD activation since low concentrations of GF109203X and rottlerin, a selective inhibitor of PKCdelta, prevented PLD stimulation.	PKCdelta|18753@10090	PKCalpha|18750@10090	0.395982
PMID.dPMID18523985.s9.p0	http://www.ncbi.nlm.nih.gov/pubmed/18523985	http://colonet.informatik.hu-berlin.de/geneview/view/abstract/18523985	We show for the first time distinct involvement of PKC isoforms PKCdelta and PKCalpha in photoaging versus cellular senescence.	PKCalpha|18750@10090	PKCdelta|18753@10090	0.387162
Sentences between PRKCA and MAPK3
PMID.dPMID20430034.s7.p0	http://www.ncbi.nlm.nih.gov/pubmed/20430034	http://colonet.informatik.hu-berlin.de/geneview/view/abstract/20430034	PKCalpha-dependent stimulation of arginine transport requires the activation of MEK/ERK1/2 cascade, which leads to the stimulation of AP-1 and to the consequent induction of CAT2 expression.	ERK1|5595@9606	PKCalpha|5578@9606	0.84472
PMID.dPMID15365248.s1.p0	http://www.ncbi.nlm.nih.gov/pubmed/15365248	http://colonet.informatik.hu-berlin.de/geneview/view/abstract/15365248	PKCalpha induces differentiation through ERK1/2 phosphorylation in mouse keratinocytes.	ERK1|26417@10090	PKCalpha|18750@10090	0.788953
PMID.dPMID19825989.s19.p0	http://www.ncbi.nlm.nih.gov/pubmed/19825989	http://colonet.informatik.hu-berlin.de/geneview/view/abstract/19825989	RAMH inhibits cholangiocarcinoma growth by PKCalpha-dependent ERK1/2 dephosphorylation.	ERK1|26417@10090	PKCalpha|18750@10090	0.735427
PMID.dPMID14638727.s17.p1	http://www.ncbi.nlm.nih.gov/pubmed/14638727	http://colonet.informatik.hu-berlin.de/geneview/view/abstract/14638727	ERK1, p38 kinase, and PKCalpha can be used as molecular markers for aging.	PKCalpha|24680@10116	ERK1|50689@10116	0.702843
PMID.dPMID16697745.s12.p0	http://www.ncbi.nlm.nih.gov/pubmed/16697745	http://colonet.informatik.hu-berlin.de/geneview/view/abstract/16697745	The deltaOR signal is mediated by the IP3/CamKIIalpha/PKCalpha pathway, which inhibits the cAMP/PKA/ERK1/2/AKT cascade.	ERK1|50689@10116	PKCalpha|24680@10116	0.67654
PMID.dPMID16697745.s13.p1	http://www.ncbi.nlm.nih.gov/pubmed/16697745	http://colonet.informatik.hu-berlin.de/geneview/view/abstract/16697745	In contrast, muOR activation stimulates the cAMP/PKA/ERK1/2/AKT cascade but does not affect the IP3/CamKIIalpha/PKCalpha pathway.	PKCalpha|24680@10116	ERK1|50689@10116	0.636007
PMID.dPMID16436473.s8.p0	http://www.ncbi.nlm.nih.gov/pubmed/16436473	http://colonet.informatik.hu-berlin.de/geneview/view/abstract/16436473	Pharmacological studies using isoform-specific PKC inhibitors and adenoviral overexpression of constitutively active PKC-delta indicated that ERK1/2 activation was PKC-alpha independent and PKC-delta dependent.	PKC-alpha|24680@10116	ERK1|50689@10116	0.540589
PMID.dPMID19318349.s10.p0	http://www.ncbi.nlm.nih.gov/pubmed/19318349	http://colonet.informatik.hu-berlin.de/geneview/view/abstract/19318349	In summary, PKCalpha, which was activated in senescent cells by ROS strongly activated Erk1/2, and the SA-pErk1/2 in turn phosphorylated Sp1 on Ser(59).	Erk1|5595@9606	PKCalpha|5578@9606	0.492897
PMID.dPMID21302808.s5.p0	http://www.ncbi.nlm.nih.gov/pubmed/21302808	http://colonet.informatik.hu-berlin.de/geneview/view/abstract/21302808	Besides, we confirmed PKCalpha played an antiapoptotic role through its effects on ERK1/2 and Akt, while its downregulation was attributed to caspase-3 and PP2Ac under the regulation of ROS.	ERK1|5595@9606	PKCalpha|5578@9606	0.482216
PMID.dPMID16014375.s8.p2	http://www.ncbi.nlm.nih.gov/pubmed/16014375	http://colonet.informatik.hu-berlin.de/geneview/view/abstract/16014375	The alphaVbeta3/PKCalpha complex formation was fully dependent upon the intracellular calcium concentration ([Ca2+]i), and the use of the intracellular Ca2+ chelator 1,2-bis(o-amino-phenoxy)ethane-N,N,N',N'-tetraaceticacidtetra (acetoxymethyl) ester (BAPTA-AM) also inhibited PKCalpha translocation and ERK1/2 phosphorylation.	ERK1|26417@10090	PKCalpha|18750@10090	0.442687
Sentences between AKT1 and PRKCA
PMC.dPMC21317450.s81.p0	http://www.ncbi.nlm.nih.gov/pubmed/21317450	http://colonet.informatik.hu-berlin.de/geneview/view/abstract/21317450	PHLPPs are predicted to have more substrates other than Akt and PKCa.	PKCa|5578@9606	Akt|207@9606	122317
PMID.dPMID16979586.s9.p0	http://www.ncbi.nlm.nih.gov/pubmed/16979586	http://colonet.informatik.hu-berlin.de/geneview/view/abstract/16979586	Our results show that IP6 inhibits phosphorylation of Akt and PKCalpha.	PKCalpha|18750@10090	Akt|207@9606	113619
PMID.dPMID10597260.s11.p0	http://www.ncbi.nlm.nih.gov/pubmed/10597260	http://colonet.informatik.hu-berlin.de/geneview/view/abstract/10597260	Together, our results demonstrate that suppression of apoptosis by PKC-alpha correlates with its ability of activating endogenous Akt.	Akt|11651@10090	PKC-alpha|18750@10090	0.944775
PMID.dPMID22532149.s11.p0	http://www.ncbi.nlm.nih.gov/pubmed/22532149	http://colonet.informatik.hu-berlin.de/geneview/view/abstract/22532149	The results indicated that Akt and PKCa were involved in OA progression, along with the increase of cell apoptosis.	PKCa|5578@9606	Akt|207@9606	0.743142
PMID.dPMID20064931.s10.p0	http://www.ncbi.nlm.nih.gov/pubmed/20064931	http://colonet.informatik.hu-berlin.de/geneview/view/abstract/20064931	Moreover, the effects of PKCalpha were caused by its inhibition of Akt, which stabilizes USP8.	Akt|207@9606	PKCalpha|5578@9606	0.681631
PMID.dPMID16697745.s12.p1	http://www.ncbi.nlm.nih.gov/pubmed/16697745	http://colonet.informatik.hu-berlin.de/geneview/view/abstract/16697745	The deltaOR signal is mediated by the IP3/CamKIIalpha/PKCalpha pathway, which inhibits the cAMP/PKA/ERK1/2/AKT cascade.	AKT|24185@10116	PKCalpha|24680@10116	0.67654
PMID.dPMID20691662.s9.p0	http://www.ncbi.nlm.nih.gov/pubmed/20691662	http://colonet.informatik.hu-berlin.de/geneview/view/abstract/20691662	PKC-alpha purified from T cells can phosphorylate Akt at Ser(473) in vitro upon TCR stimulation.	Akt|207@9606	PKC-alpha|5578@9606	0.662611
PMID.dPMID18851840.s7.p1	http://www.ncbi.nlm.nih.gov/pubmed/18851840	http://colonet.informatik.hu-berlin.de/geneview/view/abstract/18851840	PKCalpha knockdown mimics the effect of S4 deletion on mTORC2 localization and Akt activation.	Akt|11651@10090	PKCalpha|18750@10090	0.649387
PMID.dPMID10597260.s6.p0	http://www.ncbi.nlm.nih.gov/pubmed/10597260	http://colonet.informatik.hu-berlin.de/geneview/view/abstract/10597260	Correlating with the inhibition of apoptosis, PKC-alpha transfectants exhibited increased activity of the endogenous Akt serine/threonine kinase.	Akt|11651@10090	PKC-alpha|18750@10090	0.641992
PMID.dPMID16697745.s13.p2	http://www.ncbi.nlm.nih.gov/pubmed/16697745	http://colonet.informatik.hu-berlin.de/geneview/view/abstract/16697745	In contrast, muOR activation stimulates the cAMP/PKA/ERK1/2/AKT cascade but does not affect the IP3/CamKIIalpha/PKCalpha pathway.	PKCalpha|24680@10116	AKT|24185@10116	0.636007
Sentences between SDC4 and PRKCA
PMID.dPMID14670076.s7.p2	http://www.ncbi.nlm.nih.gov/pubmed/14670076	http://colonet.informatik.hu-berlin.de/geneview/view/abstract/14670076	Furthermore, the activation of PKC increased the extent of interaction between syndecan-4 and PKC-alpha.	PKC-alpha|24680@10116	syndecan-4|24771@10116	134196
PMID.dPMID16787950.s4.p0	http://www.ncbi.nlm.nih.gov/pubmed/16787950	http://colonet.informatik.hu-berlin.de/geneview/view/abstract/16787950	Signalling events studied thus far suggest the formation of a ternary complex between syndecan-4, phosphatidylinositol 4,5-bisphosphate and protein kinase C alpha (PKCalpha).	protein kinase C alpha|24680@10116	syndecan-4|24771@10116	122677
PMID.dPMID14670076.s11.p0	http://www.ncbi.nlm.nih.gov/pubmed/14670076	http://colonet.informatik.hu-berlin.de/geneview/view/abstract/14670076	Taken together, these results suggest that syndecan-4 interacts with PKC-alpha in vivo and regulates its localization, activity and stability.	PKC-alpha|24680@10116	syndecan-4|24771@10116	119105
PMID.dPMID16787950.s4.p1	http://www.ncbi.nlm.nih.gov/pubmed/16787950	http://colonet.informatik.hu-berlin.de/geneview/view/abstract/16787950	Signalling events studied thus far suggest the formation of a ternary complex between syndecan-4, phosphatidylinositol 4,5-bisphosphate and protein kinase C alpha (PKCalpha).	PKCalpha|24680@10116	syndecan-4|24771@10116	118686
PMID.dPMID9748216.s1.p0	http://www.ncbi.nlm.nih.gov/pubmed/9748216	http://colonet.informatik.hu-berlin.de/geneview/view/abstract/9748216	Phosphorylation of the cytoplasmic tail of syndecan-4 regulates activation of protein kinase Calpha.	protein kinase Calpha|24680@10116	syndecan-4|24771@10116	103137
PMID.dPMID11916978.s11.p0	http://www.ncbi.nlm.nih.gov/pubmed/11916978	http://colonet.informatik.hu-berlin.de/geneview/view/abstract/11916978	We conclude that PKCdelta regulates PKCalpha activity in a syndecan-4-dependent manner.	syndecan-4|24771@10116	PKCalpha|24680@10116	0.757985
PMID.dPMID9079625.s8.p0	http://www.ncbi.nlm.nih.gov/pubmed/9079625	http://colonet.informatik.hu-berlin.de/geneview/view/abstract/9079625	The core protein of syndecan-4 can directly bind the catalytic domain of PKCalpha and potentiate its activation by phospholipid mediators.	PKCalpha|24680@10116	syndecan-4|24771@10116	0.741893
PMID.dPMID16310216.s4.p1	http://www.ncbi.nlm.nih.gov/pubmed/16310216	http://colonet.informatik.hu-berlin.de/geneview/view/abstract/16310216	We have shown that the syndecan-4 cytoplasmic domain (4L) forms oligomeric complexes that bind to and stimulate PKCalpha activity in the presence of PtdIns(4,5)P2, emphasizing the importance of multimerization in the regulation of PKCalpha activation.	PKCalpha|24680@10116	syndecan-4|24771@10116	0.723255
PMID.dPMID14670076.s6.p0	http://www.ncbi.nlm.nih.gov/pubmed/14670076	http://colonet.informatik.hu-berlin.de/geneview/view/abstract/14670076	Using mammalian two-hybrid assays, we showed that syndecan-4 interacted with PKC-alpha in vivo and that this interaction was mediated through syndecan-4 cytoplasmic domain.	PKC-alpha|24680@10116	syndecan-4|24771@10116	0.714099
PMID.dPMID18851840.s7.p0	http://www.ncbi.nlm.nih.gov/pubmed/18851840	http://colonet.informatik.hu-berlin.de/geneview/view/abstract/18851840	PKCalpha knockdown mimics the effect of S4 deletion on mTORC2 localization and Akt activation.	S4|20971@10090	PKCalpha|18750@10090	0.699334
Sentences between PRKCE and PRKCA
PMID.dPMID9891065.s15.p0	http://www.ncbi.nlm.nih.gov/pubmed/9891065	http://colonet.informatik.hu-berlin.de/geneview/view/abstract/9891065	Taken together, these findings indicate that PKC-alpha and PKC-epsilon can enhance the activities of at least three signaling pathways that converge on the SRE: c-Raf-MEK1-ERK-TCF, MEKK1-SEK1-JNK-TCF, and rhoA-SRF.	PKC-epsilon|18754@10090	PKC-alpha|18750@10090	0.87562
PMID.dPMID19591813.s3.p0	http://www.ncbi.nlm.nih.gov/pubmed/19591813	http://colonet.informatik.hu-berlin.de/geneview/view/abstract/19591813	During neonatal hippocampal development, serotonin 1A receptor-mediated signaling initially employs PKCepsilon to boost neuronal proliferation and then uses PKCalpha to promote synaptogenesis.	PKCalpha|18750@10090	PKCepsilon|18754@10090	0.825669
PMID.dPMID8106444.s7.p0	http://www.ncbi.nlm.nih.gov/pubmed/8106444	http://colonet.informatik.hu-berlin.de/geneview/view/abstract/8106444	In contrast, the predominant localization of cytosolic PKC-alpha and of membrane-associated PKC-epsilon was not influenced by Mg2+.	PKC-epsilon|18754@10090	PKC-alpha|18750@10090	0.6368
PMID.dPMID12794082.s12.p0	http://www.ncbi.nlm.nih.gov/pubmed/12794082	http://colonet.informatik.hu-berlin.de/geneview/view/abstract/12794082	These results provide evidence that the activation of PKC-alpha or PKC-epsilon in mouse fibroblasts can play an important role in enhancing cell cycle progression and cell proliferation.	PKC-epsilon|18754@10090	PKC-alpha|18750@10090	0.598503
PMID.dPMID16783412.s10.p0	http://www.ncbi.nlm.nih.gov/pubmed/16783412	http://colonet.informatik.hu-berlin.de/geneview/view/abstract/16783412	These results indicate that activation of MLCK is required for the positive inotropic effect of alpha(1)-adrenergic stimulation, that the Ca(2+)-independent PKCepsilon negatively modulates this effect, and that PKCalpha and IP(3) receptor activation is not involved.	PKCalpha|18750@10090	PKCepsilon|18754@10090	0.546541
PMID.dPMID2185243.s8.p0	http://www.ncbi.nlm.nih.gov/pubmed/2185243	http://colonet.informatik.hu-berlin.de/geneview/view/abstract/2185243	However, unlike PKC-alpha, -beta, and -gamma, PKC-epsilon shows no dependence upon Ca2+.	PKC-epsilon|18754@10090	PKC-alpha|18750@10090	0.544471
PMID.dPMID7730383.s9.p0	http://www.ncbi.nlm.nih.gov/pubmed/7730383	http://colonet.informatik.hu-berlin.de/geneview/view/abstract/7730383	In addition, PKC-alpha accumulates in the endoplasmic reticulum, PKC-beta II associates with actin-rich microfilaments of the cytoskeleton, PKC-gamma accumulates in Golgi organelles, and PKC-epsilon associates with nuclear membranes.	PKC-epsilon|18754@10090	PKC-alpha|18750@10090	0.498262
PMID.dPMID19591813.s8.p0	http://www.ncbi.nlm.nih.gov/pubmed/19591813	http://colonet.informatik.hu-berlin.de/geneview/view/abstract/19591813	Therefore, at P6, PKCepsilon was about 11-fold more abundant than PKCalpha.	PKCalpha|18750@10090	PKCepsilon|18754@10090	0.481321
PMID.dPMID19591813.s7.p0	http://www.ncbi.nlm.nih.gov/pubmed/19591813	http://colonet.informatik.hu-berlin.de/geneview/view/abstract/19591813	Comparison with purified proteins confirmed that the PKCepsilon levels at P6 and P15 were respectively 1.75 and 7.36 ng per 60 microg of protein, whereas PKCalpha levels at P6 and P15 were respectively 160 pg and 1.186 ng per 60 microg of protein.	PKCalpha|18750@10090	PKCepsilon|18754@10090	0.460618
PMID.dPMID10718623.s4.p0	http://www.ncbi.nlm.nih.gov/pubmed/10718623	http://colonet.informatik.hu-berlin.de/geneview/view/abstract/10718623	Protein ubiquitination PLCgamma , PKCepsilon and PKCalpha levels in murine liver and brain were also studied.	PKCalpha|18750@10090	PKCepsilon|18754@10090	0.454485
Sentences between PICK1 and PRKCA
PMID.dPMID12826667.s10.p2	http://www.ncbi.nlm.nih.gov/pubmed/12826667	http://colonet.informatik.hu-berlin.de/geneview/view/abstract/12826667	The C terminal-deleted PKCalpha fails to translocate and remains a diffuse cytoplasmic distribution, indicating that a direct interaction between PICK1 and PKCalpha is required for PKCalpha anchoring to mitochondria.	PKCalpha|18750@10090	PICK1|18693@10090	0.990156
PMID.dPMID12826667.s10.p4	http://www.ncbi.nlm.nih.gov/pubmed/12826667	http://colonet.informatik.hu-berlin.de/geneview/view/abstract/12826667	The C terminal-deleted PKCalpha fails to translocate and remains a diffuse cytoplasmic distribution, indicating that a direct interaction between PICK1 and PKCalpha is required for PKCalpha anchoring to mitochondria.	PKCalpha|18750@10090	PICK1|18693@10090	0.863471
PMID.dPMID17610064.s7.p0	http://www.ncbi.nlm.nih.gov/pubmed/17610064	http://colonet.informatik.hu-berlin.de/geneview/view/abstract/17610064	Disruption of PICK1/PKCalpha interactions by inhibitory peptides significantly increases cellular susceptibility to etoposide.	PKCalpha|18750@10090	PICK1|18693@10090	0.82981
PMID.dPMID12826667.s10.p0	http://www.ncbi.nlm.nih.gov/pubmed/12826667	http://colonet.informatik.hu-berlin.de/geneview/view/abstract/12826667	The C terminal-deleted PKCalpha fails to translocate and remains a diffuse cytoplasmic distribution, indicating that a direct interaction between PICK1 and PKCalpha is required for PKCalpha anchoring to mitochondria.	PICK1|18693@10090	PKCalpha|18750@10090	0.742833
PMID.dPMID15247289.s12.p0	http://www.ncbi.nlm.nih.gov/pubmed/15247289	http://colonet.informatik.hu-berlin.de/geneview/view/abstract/15247289	These results suggest that the PDZ domain of PICK1 has distinct PKCalpha and GluR2 binding subsite(s).	PKCalpha|5578@9606	PICK1|9463@9606	0.694345
PMID.dPMID12826667.s1.p0	http://www.ncbi.nlm.nih.gov/pubmed/12826667	http://colonet.informatik.hu-berlin.de/geneview/view/abstract/12826667	PICK1, an anchoring protein that specifically targets protein kinase Calpha to mitochondria selectively upon serum stimulation in NIH 3T3 cells.	protein kinase Calpha|18750@10090	PICK1|18693@10090	0.656301
PMID.dPMID11237868.s10.p0	http://www.ncbi.nlm.nih.gov/pubmed/11237868	http://colonet.informatik.hu-berlin.de/geneview/view/abstract/11237868	A putative carboxylate-binding loop required for PICK1 to bind PKCalpha [Staudinger, Lu and Olson (1997) J. Biol. Chem 272, 32019-32024] is within this deleted region.	PKCalpha|18750@10090	PICK1|18693@10090	0.616935
PMID.dPMID15247289.s1.p0	http://www.ncbi.nlm.nih.gov/pubmed/15247289	http://colonet.informatik.hu-berlin.de/geneview/view/abstract/15247289	The PDZ domain of PICK1 differentially accepts protein kinase C-alpha and GluR2 as interacting ligands.	protein kinase C-alpha|5578@9606	PICK1|9463@9606	0.58919
PMID.dPMID15247289.s11.p0	http://www.ncbi.nlm.nih.gov/pubmed/15247289	http://colonet.informatik.hu-berlin.de/geneview/view/abstract/15247289	Taken together, it appears that the PDZ domain of PICK1 is less sensitive to mutations for PKCalpha when compared with GluR2 binding.	PKCalpha|5578@9606	PICK1|9463@9606	0.588979
PMID.dPMID19644508.s7.p5	http://www.ncbi.nlm.nih.gov/pubmed/19644508	http://colonet.informatik.hu-berlin.de/geneview/view/abstract/19644508	The contributing cell signaling mechanisms involved enhanced binding between PKCalpha (the kinase that phosphorylates GluR2) and PICK1 (its PDZ-binding partner), and a novel protein interaction between PKCalpha and the NMDA receptor scaffolding protein PSD-95.	PKCalpha|24680@10116	PICK1|84591@10116	0.580362
Sentences between PRKCA and PRKCZ
PMID.dPMID16916948.s15.p0	http://www.ncbi.nlm.nih.gov/pubmed/16916948	http://colonet.informatik.hu-berlin.de/geneview/view/abstract/16916948	Activated PKCalpha, PKCzeta, and to a lesser extent, PKCdelta, phosphorylated the glucagon receptor in vitro.	PKCzeta|5590@9606	PKCalpha|5578@9606	0.777388
PMID.dPMID8973580.s9.p0	http://www.ncbi.nlm.nih.gov/pubmed/8973580	http://colonet.informatik.hu-berlin.de/geneview/view/abstract/8973580	Immunoelectron microscopy of ultrathin cryosections of HepG2 cells showed that PKC-zeta predominantly attaches to the trans-Golgi region, whereas PKC-alpha binds to the cis- and trans-Golgi area.	PKC-alpha|5578@9606	PKC-zeta|5590@9606	0.640974
PMID.dPMID11179745.s14.p0	http://www.ncbi.nlm.nih.gov/pubmed/11179745	http://colonet.informatik.hu-berlin.de/geneview/view/abstract/11179745	One consequence of this is production of new matrix vesicles containing PKCalpha and PKCzeta and an increase in PKC activity.	PKCzeta|5590@9606	PKCalpha|5578@9606	0.599785
PMID.dPMID11375323.s13.p0	http://www.ncbi.nlm.nih.gov/pubmed/11375323	http://colonet.informatik.hu-berlin.de/geneview/view/abstract/11375323	We conclude that activation of classic PKCs, mainly PKC-alpha, inhibits PKC-zeta and may mediate the action of PED on glucose uptake in L6 skeletal muscle cells.	PKC-zeta|5590@9606	PKC-alpha|5578@9606	0.497267
PMID.dPMID10323681.s16.p0	http://www.ncbi.nlm.nih.gov/pubmed/10323681	http://colonet.informatik.hu-berlin.de/geneview/view/abstract/10323681	In contrast, when isolated matrix vesicles (MVs) are incubated with 1,25, PKCzeta is inhibited and PKCalpha is unaffected.	PKCalpha|5578@9606	PKCzeta|5590@9606	0.474006
PMID.dPMID17786270.s7.p0	http://www.ncbi.nlm.nih.gov/pubmed/17786270	http://colonet.informatik.hu-berlin.de/geneview/view/abstract/17786270	Hb significantly modified both calcium-dependent PKCalpha and calcium-independent PKCzeta expression in HUVECs and A7r5 smooth-muscle rat cells.	PKCzeta|5590@9606	PKCalpha|24680@10116	0.462367
PMID.dPMID9930731.s14.p0	http://www.ncbi.nlm.nih.gov/pubmed/9930731	http://colonet.informatik.hu-berlin.de/geneview/view/abstract/9930731	PKC-zeta translocates from the cytosol to the membrane with kinetics similar to those of PKC-alpha and epsilon in response to DAMGO but does not undergo reverse translocation after longer exposure times.	PKC-alpha|5578@9606	PKC-zeta|5590@9606	0.417877
PMID.dPMID8375396.s11.p5	http://www.ncbi.nlm.nih.gov/pubmed/8375396	http://colonet.informatik.hu-berlin.de/geneview/view/abstract/8375396	However, arachidonic acid greatly diminishes PKC-alpha activity towards the epidermal-growth-factor-receptor-derived peptide, histone III-S and myelin basic protein, but enhances PKC-zeta activity towards the PKC-alpha-derived peptide.	PKC-alpha|5578@9606	PKC-zeta|5590@9606	0.368777
PMID.dPMID11375323.s10.p0	http://www.ncbi.nlm.nih.gov/pubmed/11375323	http://colonet.informatik.hu-berlin.de/geneview/view/abstract/11375323	In these cells, overexpression of PKC-alpha blocks insulin induction of PKC-zeta activity.	PKC-zeta|5590@9606	PKC-alpha|5578@9606	0.368194
PMID.dPMID18166155.s5.p0	http://www.ncbi.nlm.nih.gov/pubmed/18166155	http://colonet.informatik.hu-berlin.de/geneview/view/abstract/18166155	With cell lines engineered to express various PKC isoforms, we demonstrate that PKC zeta, but not PKCalpha, positively regulates Casp-2S mRNA assembly triggered by topoisomerase inhibitors.	PKCalpha|5578@9606	PKC zeta|5590@9606	0.330618
Sentences between PRKCA and PLD1
PMID.dPMID10090765.s10.p5	http://www.ncbi.nlm.nih.gov/pubmed/10090765	http://colonet.informatik.hu-berlin.de/geneview/view/abstract/10090765	The peptide also inhibited PKCalpha-stimulated PLD1 activity and the interaction between PLD1 and PKCalpha with an IC50 of 0.5 microM.	PKCalpha|24680@10116	PLD1|25096@10116	106609
PMID.dPMID16339153.s7.p0	http://www.ncbi.nlm.nih.gov/pubmed/16339153	http://colonet.informatik.hu-berlin.de/geneview/view/abstract/16339153	PKCalpha activation of PLD1 involves N- and C-terminal PLD domains.	PLD1|25096@10116	PKCalpha|24680@10116	0.91548
PMID.dPMID12431982.s15.p0	http://www.ncbi.nlm.nih.gov/pubmed/12431982	http://colonet.informatik.hu-berlin.de/geneview/view/abstract/12431982	Although PKCalpha can phosphorylate PLD1, this is a relatively slow process and is associated with inactivation of the enzyme.	PLD1|25096@10116	PKCalpha|24680@10116	0.797307
PMID.dPMID10090765.s13.p2	http://www.ncbi.nlm.nih.gov/pubmed/10090765	http://colonet.informatik.hu-berlin.de/geneview/view/abstract/10090765	Taken together, our results suggest a new mechanism for the regulation of the PKCalpha-dependent PLD activity through the molecular interaction between PLD1, PKCalpha, and caveolin-1 in caveolae.	PKCalpha|24680@10116	PLD1|25096@10116	0.745272
PMID.dPMID9920915.s7.p0	http://www.ncbi.nlm.nih.gov/pubmed/9920915	http://colonet.informatik.hu-berlin.de/geneview/view/abstract/9920915	We show that the amino-terminal 325 amino acids are required for PKC-alpha activation of PLD1 but not for activation by ARF1 and RhoA.	PLD1|5337@9606	PKC-alpha|5578@9606	0.724588
PMID.dPMID8626786.s15.p1	http://www.ncbi.nlm.nih.gov/pubmed/8626786	http://colonet.informatik.hu-berlin.de/geneview/view/abstract/8626786	The results obtained here indicate that PKCalpha and RhoA (GTP form) exert a synergistic action in the membrane-bound PLD activation in HL60 cells.	PLD|5337@9606	PKCalpha|5578@9606	0.675876
PMID.dPMID10090765.s13.p0	http://www.ncbi.nlm.nih.gov/pubmed/10090765	http://colonet.informatik.hu-berlin.de/geneview/view/abstract/10090765	Taken together, our results suggest a new mechanism for the regulation of the PKCalpha-dependent PLD activity through the molecular interaction between PLD1, PKCalpha, and caveolin-1 in caveolae.	PLD1|25096@10116	PKCalpha|24680@10116	0.672343
PMID.dPMID9507013.s12.p0	http://www.ncbi.nlm.nih.gov/pubmed/9507013	http://colonet.informatik.hu-berlin.de/geneview/view/abstract/9507013	Recombinant PKC-alpha and -betaII phosphorylated purified rPLD1 to high stoichiometry in vitro, and the phosphorylated PLD exhibited a mobility shift upon electrophoresis.	rPLD1|25096@10116	PKC-alpha|5578@9606	0.665302
PMID.dPMID11950936.s10.p3	http://www.ncbi.nlm.nih.gov/pubmed/11950936	http://colonet.informatik.hu-berlin.de/geneview/view/abstract/11950936	Therefore, because inactive, dominant negative GTPases do not activate PLD1b, we propose that activation results from phosphatidylinositol 3-kinase-dependent stimulation of Rac1, ARF6, and PKCalpha.	PKCalpha|24680@10116	PLD1b|25096@10116	0.618349
PMID.dPMID8626786.s9.p0	http://www.ncbi.nlm.nih.gov/pubmed/8626786	http://colonet.informatik.hu-berlin.de/geneview/view/abstract/8626786	PKCalpha was much more effective than PKCbeta for PLD activation.	PLD|5337@9606	PKCalpha|24680@10116	0.519455
Sentences between TGFB1 and PRKCA
PMID.dPMID12939231.s16.p0	http://www.ncbi.nlm.nih.gov/pubmed/12939231	http://colonet.informatik.hu-berlin.de/geneview/view/abstract/12939231	We propose that high glucose-induced TGF-beta1 and TGF-beta-R1 expression is mediated by PKC-alpha.	PKC-alpha|18750@10090	TGF-beta1|21803@10090	114351
PMID.dPMID12939231.s14.p0	http://www.ncbi.nlm.nih.gov/pubmed/12939231	http://colonet.informatik.hu-berlin.de/geneview/view/abstract/12939231	PKC-alpha microinjection into individual VSMCs also increased TGF-beta1 and TGF-beta-R immunofluorescence.	TGF-beta1|21803@10090	PKC-alpha|18750@10090	108328
PMID.dPMID12967633.s11.p0	http://www.ncbi.nlm.nih.gov/pubmed/12967633	http://colonet.informatik.hu-berlin.de/geneview/view/abstract/12967633	Our results demonstrate that TGFbeta1 induces adventitial myofibroblast differentiation via a PKCalpha-dependent process.	PKCalpha|24680@10116	TGFbeta1|59086@10116	1021
PMID.dPMID12939231.s13.p0	http://www.ncbi.nlm.nih.gov/pubmed/12939231	http://colonet.informatik.hu-berlin.de/geneview/view/abstract/12939231	PKC-alpha overexpression increased TGF-beta1 and TGF-beta-R1 expression but not TGF-beta-R2 expression.	TGF-beta1|21803@10090	PKC-alpha|18750@10090	0.924365
PMID.dPMID18239055.s11.p0	http://www.ncbi.nlm.nih.gov/pubmed/18239055	http://colonet.informatik.hu-berlin.de/geneview/view/abstract/18239055	The TGF-beta-induced increase in cell migration was blocked by knockdown of PKC-alpha.	PKC-alpha|5578@9606	TGF-beta|7040@9606	0.919081
PMID.dPMID19910703.s1.p0	http://www.ncbi.nlm.nih.gov/pubmed/19910703	http://colonet.informatik.hu-berlin.de/geneview/view/abstract/19910703	PKC-alpha modulates TGF-beta signaling and impairs podocyte survival.	TGF-beta|21803@10090	PKC-alpha|18750@10090	0.904781
PMID.dPMID17654516.s10.p0	http://www.ncbi.nlm.nih.gov/pubmed/17654516	http://colonet.informatik.hu-berlin.de/geneview/view/abstract/17654516	Confocal microscopy demonstrated that TGF-beta-induced nuclear accumulation of PKC-alpha was abolished in the presence of TPA at the same time points.	PKC-alpha|5578@9606	TGF-beta|7040@9606	0.628718
PMID.dPMID18239055.s10.p0	http://www.ncbi.nlm.nih.gov/pubmed/18239055	http://colonet.informatik.hu-berlin.de/geneview/view/abstract/18239055	In parallel, TGF-beta rapidly induced an increase in cytoplasmic free calcium from intracellular stores, consistent with subsequent PKC-alpha activation.	PKC-alpha|5578@9606	TGF-beta|7040@9606	0.609008
PMID.dPMID18239055.s9.p5	http://www.ncbi.nlm.nih.gov/pubmed/18239055	http://colonet.informatik.hu-berlin.de/geneview/view/abstract/18239055	In BxPc-3 cells, only two PKC isoforms were activated by TGF-beta, and PTEN downregulation by TGF-beta was specifically mediated by PKC-alpha.	PKC-alpha|5578@9606	TGF-beta|7040@9606	0.604939
PMID.dPMID10484520.s12.p0	http://www.ncbi.nlm.nih.gov/pubmed/10484520	http://colonet.informatik.hu-berlin.de/geneview/view/abstract/10484520	These results suggest that in HMC, LDL stimulates collagen mRNA expression through the rapid activation of PKC-alpha and -delta and transcriptional upregulation of TGF-beta.	TGF-beta|7040@9606	PKC-alpha|5578@9606	0.558012
Sentences between CAV1 and PRKCA
PMID.dPMID12386163.s1.p0	http://www.ncbi.nlm.nih.gov/pubmed/12386163	http://colonet.informatik.hu-berlin.de/geneview/view/abstract/12386163	Escherichia coli K1 internalization via caveolae requires caveolin-1 and protein kinase Calpha interaction in human brain microvascular endothelial cells.	protein kinase Calpha|5578@9606	caveolin-1|857@9606	0.942131
PMID.dPMID10090765.s13.p5	http://www.ncbi.nlm.nih.gov/pubmed/10090765	http://colonet.informatik.hu-berlin.de/geneview/view/abstract/10090765	Taken together, our results suggest a new mechanism for the regulation of the PKCalpha-dependent PLD activity through the molecular interaction between PLD1, PKCalpha, and caveolin-1 in caveolae.	caveolin-1|25404@10116	PKCalpha|24680@10116	0.723368
PMID.dPMID10090765.s13.p3	http://www.ncbi.nlm.nih.gov/pubmed/10090765	http://colonet.informatik.hu-berlin.de/geneview/view/abstract/10090765	Taken together, our results suggest a new mechanism for the regulation of the PKCalpha-dependent PLD activity through the molecular interaction between PLD1, PKCalpha, and caveolin-1 in caveolae.	caveolin-1|25404@10116	PKCalpha|24680@10116	0.586611
PMID.dPMID12386163.s11.p0	http://www.ncbi.nlm.nih.gov/pubmed/12386163	http://colonet.informatik.hu-berlin.de/geneview/view/abstract/12386163	The interaction of caveolin-1 with phospho-PKCalpha was completely abrogated in HBMEC overexpressing dominant-negative forms of either focal adhesion kinase or PKCalpha.	PKCalpha|5578@9606	caveolin-1|857@9606	0.571171
PMID.dPMID10090765.s1.p0	http://www.ncbi.nlm.nih.gov/pubmed/10090765	http://colonet.informatik.hu-berlin.de/geneview/view/abstract/10090765	Phospholipase D1 in caveolae: regulation by protein kinase Calpha and caveolin-1.	caveolin-1|25404@10116	protein kinase Calpha|24680@10116	0.558214
PMID.dPMID17942932.s8.p7	http://www.ncbi.nlm.nih.gov/pubmed/17942932	http://colonet.informatik.hu-berlin.de/geneview/view/abstract/17942932	Disruption of the membrane with methyl-beta-cyclodextrin dissociates the EGFR/GM3/caveolin-1/CD82/PKC-alpha complex and prevents the inhibitory effect of PKC-alpha on EGFR phosphorylation, suggesting that caveolin-1, CD82, and ganglioside interact with EGFR and PKC-alpha within intact cholesterol-enriched membrane microdomains.	PKC-alpha|5578@9606	caveolin-1|857@9606	0.457894
PMC.dPMC21471610.s72.p5	http://www.ncbi.nlm.nih.gov/pubmed/21471610	http://colonet.informatik.hu-berlin.de/geneview/view/abstract/21471610	These results were recapitulated by PKCalpha knockdown and re-expression in ESFT cells in which CAV1 was previously knocked down, thus demonstrating that phospho-PKCalpha acts downstream of CAV1 to determine the sensitivity of ESFT cells to chemotherapeutic drugs.	CAV1|857@9606	PKCalpha|18750@10090	0.342967
PMID.dPMID17942932.s8.p19	http://www.ncbi.nlm.nih.gov/pubmed/17942932	http://colonet.informatik.hu-berlin.de/geneview/view/abstract/17942932	Disruption of the membrane with methyl-beta-cyclodextrin dissociates the EGFR/GM3/caveolin-1/CD82/PKC-alpha complex and prevents the inhibitory effect of PKC-alpha on EGFR phosphorylation, suggesting that caveolin-1, CD82, and ganglioside interact with EGFR and PKC-alpha within intact cholesterol-enriched membrane microdomains.	caveolin-1|857@9606	PKC-alpha|5578@9606	0.327125
PMID.dPMID17942932.s8.p18	http://www.ncbi.nlm.nih.gov/pubmed/17942932	http://colonet.informatik.hu-berlin.de/geneview/view/abstract/17942932	Disruption of the membrane with methyl-beta-cyclodextrin dissociates the EGFR/GM3/caveolin-1/CD82/PKC-alpha complex and prevents the inhibitory effect of PKC-alpha on EGFR phosphorylation, suggesting that caveolin-1, CD82, and ganglioside interact with EGFR and PKC-alpha within intact cholesterol-enriched membrane microdomains.	caveolin-1|857@9606	PKC-alpha|5578@9606	0.315721
PMID.dPMID12386163.s12.p0	http://www.ncbi.nlm.nih.gov/pubmed/12386163	http://colonet.informatik.hu-berlin.de/geneview/view/abstract/12386163	Treatment of HBMEC with a cell-permeable peptide that represents the scaffolding domain, which was coupled to an antennapedia motif of a Drosophila transcription factor significantly blocked the interaction of caveolin-1 with phospho-PKCalpha and E. coli invasion.	PKCalpha|5578@9606	caveolin-1|857@9606	0.30381
Sentences between PRKCA and EGFR
PMID.dPMID17942932.s4.p0	http://www.ncbi.nlm.nih.gov/pubmed/17942932	http://colonet.informatik.hu-berlin.de/geneview/view/abstract/17942932	The molecular interactions upstream to PKC-alpha that influence its suppression of EGFR, however, are poorly understood.	EGFR|1956@9606	PKC-alpha|5578@9606	0.766937
PMID.dPMID17942932.s8.p14	http://www.ncbi.nlm.nih.gov/pubmed/17942932	http://colonet.informatik.hu-berlin.de/geneview/view/abstract/17942932	Disruption of the membrane with methyl-beta-cyclodextrin dissociates the EGFR/GM3/caveolin-1/CD82/PKC-alpha complex and prevents the inhibitory effect of PKC-alpha on EGFR phosphorylation, suggesting that caveolin-1, CD82, and ganglioside interact with EGFR and PKC-alpha within intact cholesterol-enriched membrane microdomains.	EGFR|1956@9606	PKC-alpha|5578@9606	0.59161
PMID.dPMID17558679.s6.p0	http://www.ncbi.nlm.nih.gov/pubmed/17558679	http://colonet.informatik.hu-berlin.de/geneview/view/abstract/17558679	PKCalpha immunolocalization in d17, d19, and d21 fetal lung fibroblasts was similar to EGFR.	EGFR|24329@10116	PKCalpha|24680@10116	0.544479
PMID.dPMID17942932.s8.p44	http://www.ncbi.nlm.nih.gov/pubmed/17942932	http://colonet.informatik.hu-berlin.de/geneview/view/abstract/17942932	Disruption of the membrane with methyl-beta-cyclodextrin dissociates the EGFR/GM3/caveolin-1/CD82/PKC-alpha complex and prevents the inhibitory effect of PKC-alpha on EGFR phosphorylation, suggesting that caveolin-1, CD82, and ganglioside interact with EGFR and PKC-alpha within intact cholesterol-enriched membrane microdomains.	PKC-alpha|5578@9606	EGFR|1956@9606	0.51012
PMID.dPMID17307332.s9.p0	http://www.ncbi.nlm.nih.gov/pubmed/17307332	http://colonet.informatik.hu-berlin.de/geneview/view/abstract/17307332	Thus, multiple lines of evidence support the hypothesis that conventional PKC isoforms, especially PKCalpha, mediate feedback inhibition of GPCR-induced EGFR transactivation.	EGFR|1956@9606	PKCalpha|5578@9606	0.504243
PMID.dPMID17942932.s8.p6	http://www.ncbi.nlm.nih.gov/pubmed/17942932	http://colonet.informatik.hu-berlin.de/geneview/view/abstract/17942932	Disruption of the membrane with methyl-beta-cyclodextrin dissociates the EGFR/GM3/caveolin-1/CD82/PKC-alpha complex and prevents the inhibitory effect of PKC-alpha on EGFR phosphorylation, suggesting that caveolin-1, CD82, and ganglioside interact with EGFR and PKC-alpha within intact cholesterol-enriched membrane microdomains.	PKC-alpha|5578@9606	EGFR|1956@9606	0.457894
PMID.dPMID17942932.s8.p13	http://www.ncbi.nlm.nih.gov/pubmed/17942932	http://colonet.informatik.hu-berlin.de/geneview/view/abstract/17942932	Disruption of the membrane with methyl-beta-cyclodextrin dissociates the EGFR/GM3/caveolin-1/CD82/PKC-alpha complex and prevents the inhibitory effect of PKC-alpha on EGFR phosphorylation, suggesting that caveolin-1, CD82, and ganglioside interact with EGFR and PKC-alpha within intact cholesterol-enriched membrane microdomains.	EGFR|1956@9606	PKC-alpha|5578@9606	0.442558
[truncated: 14,152 more rows]
