# Supplementary material for: Assembly of a Comprehensive Regulatory Network for the Mammalian Circadian Clock: A Bioinformatics Approach
Source: PLoS One. 2015 May 6;10(5):e0126283. doi: 10.1371/journal.pone.0126283 (PMC4422523; doi:10.1371/journal.pone.0126283)
Supplement: S3 Table — The table provides the term ids (“GO.ID”), the corresponding “Term”, as well as the overrepresentation p-value after false discovery rate correction after Benjamini-Hochberg (“pval”). In addition, the total number of genes annotated with the respective term is provided (“Annotated”), the number of significant annotations (“Significant”), along with the number of annotations expected by chance in the gene set (“Expected”). (XLSX) [file pone.0126283.s012.xlsx]

## Sheet: SI_Table4_textmining_pred_ECCNt
GO.ID	Term	Annotated	Significant	Expected	pval	ontology
GO:0045944	positive regulation of transcription from RNA polymerase II promoter	594	147	37.37	< 1e-30	bp
GO:0042493	response to drug	329	96	41840	2.6e-25	bp
GO:0001666	response to hypoxia	215	69	13.53	1.1e-19	bp
GO:0000122	negative regulation of transcription from RNA polymerase II promoter	422	88	26.55	7.6e-18	bp
GO:0032496	response to lipopolysaccharide	203	75	28460	1.6e-15	bp
GO:0014070	response to organic cyclic compound	207	72	41683	2.0e-13	bp
GO:0006916	anti-apoptosis	258	64	16.23	7.5e-13	bp
GO:0045471	response to ethanol	94	35	33359	1.1e-12	bp
GO:0007173	epidermal growth factor receptor signaling pathway	160	45	41830	1.1e-11	bp
GO:0030168	platelet activation	216	53	13.59	1.1e-11	bp
GO:0008285	negative regulation of cell proliferation	480	104	30.2	1.5e-10	bp
GO:0048011	nerve growth factor receptor signaling pathway	221	48	13.91	2.3e-10	bp
GO:0043066	negative regulation of apoptotic process	566	135	35.61	7.2e-10	bp
GO:0032355	response to estradiol stimulus	89	29	41795	1.7e-09	bp
GO:0008633	activation of pro-apoptotic gene produts	31	17	34700	4.3e-09	bp
GO:0032570	response to progesterone stimulus	26	16	23377	1.7e-08	bp
GO:0042593	glucose homeostasis	94	35	33359	1.9e-08	bp
GO:0044419	interspecies interaction between organisms	381	82	23.97	2.8e-08	bp
GO:0043065	positive regulation of apoptotic process	559	123	35.17	3.1e-08	bp
GO:0031663	lipopolysaccharide-mediated signaling pathway	34	16	41671	3.9e-08	bp
GO:0051384	response to glucocorticoid stimulus	132	42	11536	7.0e-08	bp
GO:0010332	response to gamma radiation	34	18	41671	7.9e-08	bp
GO:0008543	fibroblast growth factor receptor signaling pathway	137	36	22859	1.0e-07	bp
GO:0031100	organ regeneration	51	20	44256	1.0e-07	bp
GO:0034097	response to cytokine stimulus	476	115	29.95	2.1e-07	bp
GO:0071222	cellular response to lipopolysaccharide	82	35	42491	2.2e-07	bp
GO:0051091	positive regulation of sequence-specific DNA binding transcription factor activity	164	50	11963	2.6e-07	bp
GO:0043627	response to estrogen stimulus	149	49	13759	7.0e-07	bp
GO:0008063	Toll signaling pathway	76	24	28581	1.0e-06	bp
GO:0048661	positive regulation of smooth muscle cell proliferation	36	16	46419	1.3e-06	bp
GO:0032757	positive regulation of interleukin-8 production	19	12	41671	1.4e-06	bp
GO:0071260	cellular response to mechanical stimulus	52	19	46447	1.5e-06	bp
GO:0006919	activation of cysteine-type endopeptidase activity involved in apoptotic process	81	25	41644	2.0e-06	bp
GO:0009408	response to heat	68	23	46844	2.6e-06	bp
GO:0042738	exogenous drug catabolic process	8	8	0.5	2.7e-06	bp
GO:0045892	negative regulation of transcription, DNA-templated	723	137	45.49	3.3e-06	bp
GO:0035666	TRIF-dependent toll-like receptor signaling pathway	62	20	41885	6.4e-06	bp
GO:0006367	transcription initiation from RNA polymerase II promoter	155	35	27638	6.6e-06	bp
GO:0051092	positive regulation of NF-kappaB transcription factor activity	89	24	41795	7.8e-06	bp
GO:0050731	positive regulation of peptidyl-tyrosine phosphorylation	115	39	45474	1.2e-05	bp
GO:0009749	response to glucose stimulus	104	33	19876	1.3e-05	bp
GO:0055093	response to hyperoxia	20	13	46023	1.3e-05	bp
GO:0032760	positive regulation of tumor necrosis factor production	31	14	34700	1.5e-05	bp
GO:0007050	cell cycle arrest	372	70	23.41	1.7e-05	bp
GO:0007584	response to nutrient	228	66	14.35	2.2e-05	bp
GO:0050728	negative regulation of inflammatory response	61	21	30742	2.3e-05	bp
GO:0034142	toll-like receptor 4 signaling pathway	82	24	42491	2.4e-05	bp
GO:0007219	Notch signaling pathway	130	30	43313	3.0e-05	bp
GO:0007568	aging	194	55	44531	3.3e-05	bp
GO:0034138	toll-like receptor 3 signaling pathway	68	20	46844	4.0e-05	bp
GO:0006974	response to DNA damage stimulus	566	94	35.61	4.0e-05	bp
GO:0008284	positive regulation of cell proliferation	583	124	36.68	4.9e-05	bp
GO:0043524	negative regulation of neuron apoptotic process	79	22	35521	5.5e-05	bp
GO:0008286	insulin receptor signaling pathway	159	40	10	7.3e-05	bp
GO:0043123	positive regulation of I-kappaB kinase/NF-kappaB signaling	138	29	25051	7.7e-05	bp
GO:0006805	xenobiotic metabolic process	132	29	11536	0.00013	bp
GO:0044281	small molecule metabolic process	2223	246	139.87	0.00013	bp
GO:0002576	platelet degranulation	83	22	44682	0.00015	bp
GO:0071347	cellular response to interleukin-1	44	16	28157	0.00017	bp
GO:0033138	positive regulation of peptidyl-serine phosphorylation	33	14	41853	0.00018	bp
GO:0034130	toll-like receptor 1 signaling pathway	67	19	44652	0.00019	bp
GO:0007267	cell-cell signaling	1019	151	64.11	0.00019	bp
GO:0032722	positive regulation of chemokine production	26	15	23377	0.00023	bp
GO:0045429	positive regulation of nitric oxide biosynthetic process	27	12	41821	0.00029	bp
GO:0006917	induction of apoptosis	382	79	41753	0.00034	bp
GO:0006921	cellular component disassembly involved in execution phase of apoptosis	72	18	19450	0.00035	bp
GO:0030335	positive regulation of cell migration	202	55	26268	0.00039	bp
GO:0043200	response to amino acid stimulus	64	21	41702	0.00044	bp
GO:0046677	response to antibiotic	37	14	12086	0.00047	bp
GO:0032755	positive regulation of interleukin-6 production	28	12	27760	0.00048	bp
GO:0034134	toll-like receptor 2 signaling pathway	71	19	17258	0.00054	bp
GO:0032735	positive regulation of interleukin-12 production	19	10	41671	0.00057	bp
GO:0018105	peptidyl-serine phosphorylation	99	33	45078	0.00058	bp
GO:0032868	response to insulin stimulus	247	66	15.54	0.00059	bp
GO:0045672	positive regulation of osteoclast differtiation	15	9	0.94	0.00060	bp
GO:0002755	MyD88-dependent toll-like receptor signaling pathway	75	21	26390	0.00066	bp
GO:0030324	lung development	133	30	13728	0.00072	bp
GO:0030890	positive regulation of B cell proliferation	35	13	41672	0.00101	bp
GO:0071456	cellular response to hypoxia	51	17	44256	0.00105	bp
GO:0044255	cellular lipid metabolic process	740	102	46.56	0.00110	bp
GO:0009612	response to mechanical stimulus	117	38	13332	0.00118	bp
GO:0043433	negative regulation of sequence-specific DNA binding transcription factor activity	110	25	33756	0.00119	bp
GO:0042346	positive regulation of NF-kappaB import into nucleus	20	10	46023	0.00127	bp
GO:0035162	embryonic hemopoiesis	22	10	13881	0.00128	bp
GO:0050829	defense response to Gram-negative bacterium	16	9	41640	0.00128	bp
GO:0031018	endocrine pancreas development	51	16	44256	0.00180	bp
GO:0007507	heart development	338	63	21.27	0.00183	bp
GO:0051591	response to cAMP	69	18	12510	0.00196	bp
GO:0050729	positive regulation of inflammatory response	64	22	41702	0.00196	bp
GO:0045740	positive regulation of DNA replication	40	14	19025	0.00214	bp
GO:0014068	positive regulation of phosphatidylinositol 3-kinase signaling	37	13	12086	0.00217	bp
GO:0001889	liver development	84	23	47239	0.00218	bp
GO:0008629	intrinsic apoptotic signaling pathway	90	31	24228	0.00255	bp
GO:0002053	positive regulation of mesenchymal cell proliferation	33	13	41853	0.00278	bp
GO:0071407	cellular response to organic cyclic compound	50	16	42064	0.00295	bp
GO:0090263	positive regulation of canonical Wnt signaling pathway	44	14	28157	0.00302	bp
GO:0001892	embryonic placenta development	66	22	42095	0.00305	bp
GO:0046627	negative regulation of insulin receptor signaling pathway	22	10	13881	0.00337	bp
GO:0045766	positive regulation of angiogenesis	78	21	33329	0.00354	bp
GO:0045893	positive regulation of transcription, DNA-templated	902	191	56.75	0.00359	bp
GO:0006954	inflammatory response	440	98	27.68	0.00383	bp
GO:0008203	cholesterol metabolic process	112	27	41766	0.00422	bp
GO:0010870	positive regulation of receptor biosynthetic process	11	7	0.69	0.00454	bp
GO:0051897	positive regulation of protein kinase B signaling	52	15	46447	0.00477	bp
GO:0032728	positive regulation of interferon-beta production	18	9	41275	0.00485	bp
GO:0071346	cellular response to interferon-gamma	80	26	41703	0.00507	bp
GO:0001975	response to amphetamine	23	10	16438	0.00562	bp
GO:0044130	negative regulation of growth of symbiont in host	14	8	0.88	0.00573	bp
GO:0006468	protein phosphorylation	1073	195	67.51	0.00740	bp
GO:0005515	protein binding	6831	675	414.63	4.2e-15	mf
GO:0008134	transcription factor binding	380	94	41843	4.7e-12	mf
GO:0019901	protein kinase binding	333	68	20.21	1.8e-11	mf
GO:0019899	enzyme binding	1011	177	61.37	2.4e-11	mf
GO:0020037	heme binding	121	34	12601	7.0e-11	mf
GO:0043565	sequence-specific DNA binding	640	111	38.85	9.8e-11	mf
GO:0044212	transcription regulatory region DNA binding	302	78	18.33	1.4e-10	mf
GO:0003705	RNA polymerase II distal enhancer sequence-specific DNA binding transcription factor activity	99	29	41645	8.9e-09	mf
GO:0042803	protein homodimerization activity	515	74	31.26	1.0e-08	mf
GO:0046982	protein heterodimerization activity	261	48	15.84	1.4e-08	mf
GO:0003707	steroid hormone receptor activity	52	20	42430	1.4e-06	mf
GO:0042802	identical protein binding	783	116	47.53	1.0e-05	mf
GO:0005125	cytokine activity	194	40	28795	2.4e-05	mf
GO:0019825	oxygen binding	33	13	2	9.7e-05	mf
GO:0003690	double-stranded DNA binding	139	32	16285	0.00012	mf
GO:0003700	sequence-specific DNA binding transcription factor activity	951	141	57.72	0.00015	mf
GO:0003682	chromatin binding	235	43	14.26	0.00021	mf
GO:0042826	histone deacetylase binding	61	17	41823	0.00028	mf
GO:0008083	growth factor activity	161	29	28369	0.00043	mf
GO:0031625	ubiquitin protein ligase binding	135	26	43678	0.00049	mf
GO:0004715	non-membrane spanning protein tyrosine kinase activity	44	14	24504	0.00065	mf
GO:0070330	aromatase activity	24	10	16803	0.00218	mf
GO:0003713	transcription coactivator activity	259	51	15.72	0.00328	mf
GO:0001102	RNA polymerase II activating transcription factor binding	25	10	18994	0.00344	mf
GO:0004871	signal transducer activity	1548	133	93.96	0.00467	mf
GO:0035035	histone acetyltransferase binding	16	8	0.97	0.00558	mf
GO:0001077	RNA polymerase II core promoter proximal region sequence-specific DNA binding transcription factor activity involved in positive regulation of transcription	45	13	26696	0.00620	mf
GO:0070412	R-SMAD binding	17	8	41699	0.00998	mf
GO:0005654	nucleoplasm	1401	205	77.03	2.4e-26	cc
GO:0005829	cytosol	2217	244	121.9	1.9e-24	cc
GO:0005615	extracellular space	805	114	44.26	2.8e-15	cc
GO:0016363	nuclear matrix	78	21	47209	9.8e-07	cc
GO:0009986	cell surface	454	70	24.96	1.2e-06	cc
GO:0005667	transcription factor complex	263	42	14.46	2.3e-06	cc
GO:0005741	mitochondrial outer membrane	115	24	11841	4.4e-06	cc
GO:0048471	perinuclear region of cytoplasm	444	56	24.41	6.4e-06	cc
GO:0005901	caveola	56	16	41854	4.1e-05	cc
GO:0000790	nuclear chromatin	133	29	11505	9.7e-05	cc
GO:0005938	cell cortex	170	26	13028	0.00034	cc
GO:0005737	cytoplasm	8573	611	471.38	0.00077	cc
GO:0031093	platelet alpha granule lumen	47	13	21217	0.00120	cc
GO:0045121	membrane raft	177	37	26908	0.00252	cc
GO:0009897	external side of plasma membrane	178	28	29099	0.00382	cc
GO:0043025	neuronal cell body	245	38	13.47	0.00435	cc
